# Supplementary material for: Close Related Drug-Resistance Beijing Isolates of Mycobacterium tuberculosis Reveal a Different Transcriptomic Signature in a Murine Disease Progression Model
Source: MDPI journal article supplement (doi:10.3390/ijms23095157), 2022-05-05
Supplement: s1 [file s1]

**Supplementary Figure S3. Venn diagram of DEG in strain BC-391 vs BL-323 along days post-infection**

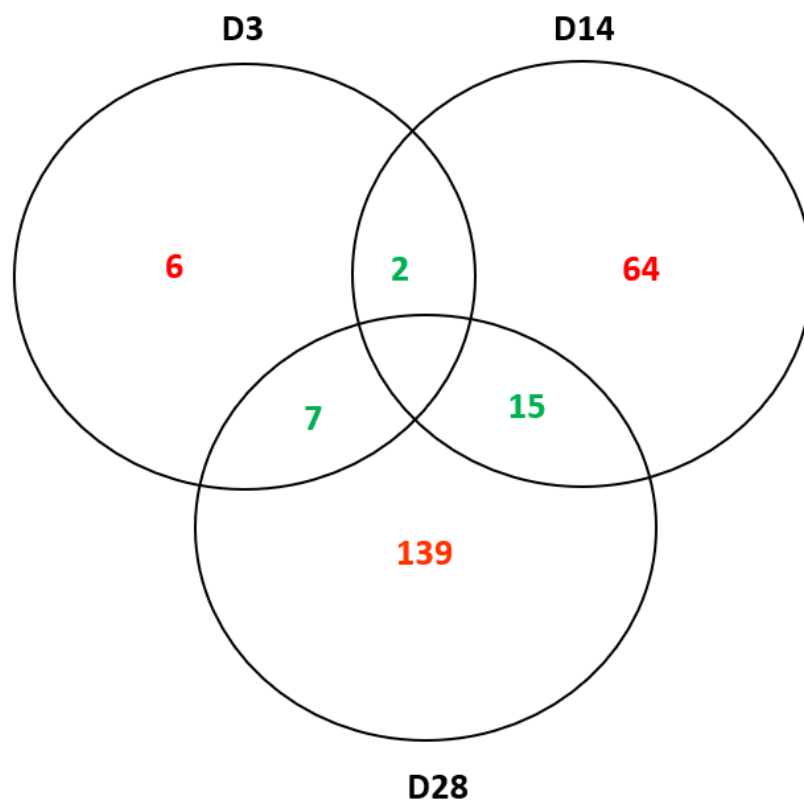

Comparison of DEG between strain BL-391 and strain BL-323 at the day post-infection (PI). Each circle represents a day PI. Red numbers indicate DEG between strains at specific day PI. Green numbers indicate DEG shares between days PI.
