# Supplementary material for: Close Related Drug-Resistance Beijing Isolates of Mycobacterium tuberculosis Reveal a Different Transcriptomic Signature in a Murine Disease Progression Model
Source: MDPI journal article supplement (doi:10.3390/ijms23095157), 2022-05-05
Supplement: s1 [file s1]

**Supplementary Figure S2. Venn diagram of DEG in strain BC-391 along days PI.**

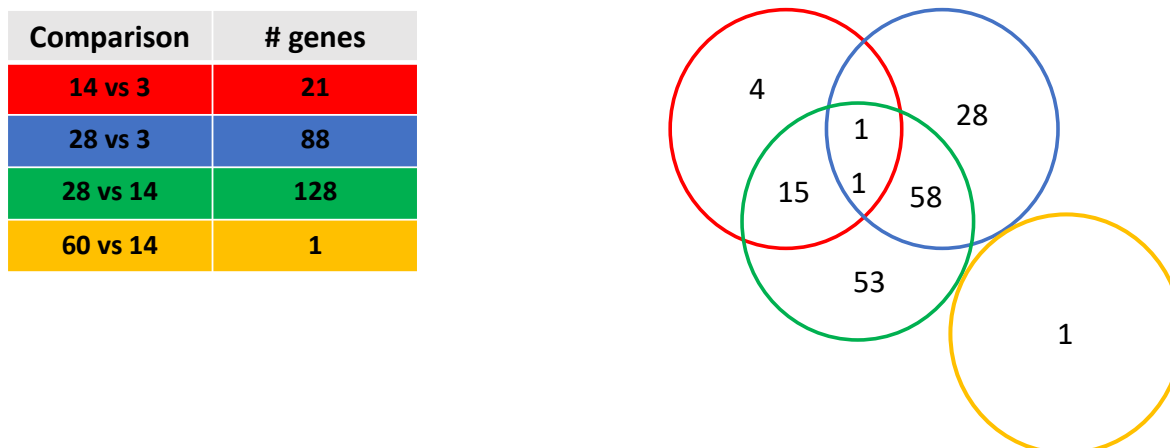

Comparison of DEG in the BL-391 strain at the day post-infection (PI). Twenty-one genes were differentially expressed at D14 vs D3 PI; 88 genes were differentially expressed at D28 vs D3 PI, 128 genes were differentially expressed at D28 vs D14 PI, and 1 gene was differentially expressed at D60 vs 14. The colours of rows in the table and circles indicate the comparison made.
