# Supplementary material for: Close Related Drug-Resistance Beijing Isolates of Mycobacterium tuberculosis Reveal a Different Transcriptomic Signature in a Murine Disease Progression Model
Source: MDPI journal article supplement (doi:10.3390/ijms23095157), 2022-05-05
Supplement: s1 [file s1]

**Supplementary Figure S1. Venn diagram of Differentially Expressed Genes (DEG) in strain BL-323 during the infection process.**

| Comparison | # genes |
|------------|---------|
| 14 vs 3    | 15      |
| 28 vs 3    | 43      |
| 28 vs 14   | 9       |

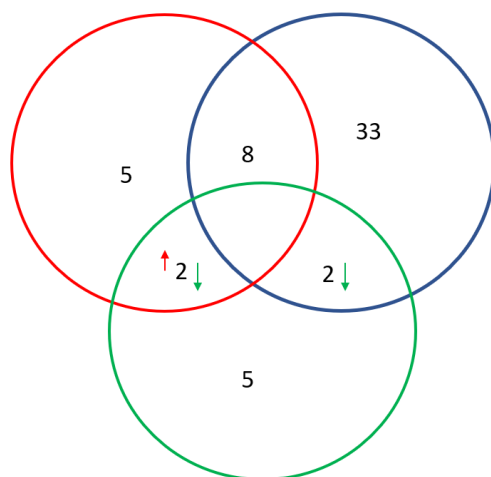

Comparison of DEG in the BL-323 strain at the day post-infection (PI). Fifteen genes were differentially expressed at D14 vs 3D PI; 43 genes were differentially expressed at D28 vs D3 PI, and 9 genes were differentially expressed at D28 vs D14 PI. Up arrows indicate over-expression, and down arrows indicate repression. Colours of circles and arrows indicate the comparison made.
