# Supplementary material for: Close Related Drug-Resistance Beijing Isolates of Mycobacterium tuberculosis Reveal a Different Transcriptomic Signature in a Murine Disease Progression Model
Source: Int J Mol Sci. 2022 May 5;23(9):5157. doi: 10.3390/ijms23095157 (PMC9100210; doi:10.3390/ijms23095157)
Supplement: Supplementary file 1 [file ijms-23-05157-s001.zip]

Archive with 6 entries (6 files):
- Supplementary Figure S1.pdf
- Supplementary Figure S2.pdf
- Supplementary Figure S3.pdf
- TABLE  S1. TOTAL READS.xlsx
- TABLE S2. INTRA-STRAIN ANALYSIS.ods
- TABLE S3. INTER-STRAIN ANALYSIS.ods
