# Supplementary material for: Close Related Drug-Resistance Beijing Isolates of Mycobacterium tuberculosis Reveal a Different Transcriptomic Signature in a Murine Disease Progression Model
Source: Int J Mol Sci. 2022 May 5;23(9):5157. doi: 10.3390/ijms23095157 (PMC9100210; doi:10.3390/ijms23095157)
Supplement: Supplementary file 1 [file ijms-23-05157-s001.zip › TABLE S1. TOTAL READS.xlsx]

## Sheet: CP010873_counts (BL-323)
SUPPLEMENATRY TABLE 1. TOTAL READ COUNTS OF THE BL-323 AND BC-391 STRAINS
Gene_id	323D3R1.1	323D3R1.2	323D3R1.3	323D3R1.4	323D3R2.1	323D3R2.2	323D3R2.3	323D3R2.4	323D3R3.1	323D3R3.2	323D3R3.3	323D3R3.4	323D14R6.1	323D14R6.2	323D14R6.3	323D14R6.4	323D14R7.1	323D14R7.2	323D14R7.3	323D14R7.4	323D14R8.1	323D14R8.2	323D14R8.3	323D14R8.4	323D28R6.1	323D28R6.2	323D28R6.3	323D28R6.4	323D28R7.1	323D28R7.2	323D28R7.3	323D28R7.4	323D28R8.1	323D28R8.2	323D28R8.3	323D28R8.4
*|AJW47722.1|UB21_00010 |*|*|transposase	0	0	0	0	0	0	0	0	0	0	0	0	0	0	0	0	0	0	0	0	0	0	0	0	0	0	0	0	0	0	0	0	0	0	0	0
*|AJW47723.1|UB21_00015 |*|*|transposase	0	0	0	0	0	0	0	0	0	0	0	0	0	0	0	0	0	0	0	0	0	0	0	0	2	0	0	0	0	0	0	0	0	0	0	0
*|AJW47729.1|UB21_00060|ARN04753.1|BJM02_00060|hypothetical protein	0	0	0	0	0	0	0	0	0	0	0	0	0	0	0	0	0	0	0	0	0	0	0	0	0	0	0	0	0	0	0	0	0	0	0	0
*|AJW47771.1|UB21_00335|ARN04800.1|BJM02_00335|hypothetical protein	0	0	0	0	0	0	0	0	0	0	2	0	0	0	0	0	0	0	0	0	0	0	0	0	0	0	0	0	0	0	1	0	0	0	0	0
*|AJW47772.1|UB21_00340|ARN04801.1|BJM02_00340|hypothetical protein	0	0	0	0	0	0	0	0	2	0	0	0	0	0	0	0	0	0	0	0	0	0	1	0	1	0	0	0	0	0	0	0	0	0	0	0
*|AJW47807.1|UB21_00560|ARN04836.1|BJM02_00560|hypothetical protein	0	0	0	0	0	0	0	0	0	0	0	0	0	0	0	0	0	0	0	0	0	0	0	0	0	0	0	0	0	0	0	0	0	0	0	0
*|AJW47811.1|UB21_00585 |*|*|hypothetical protein	0	0	0	0	0	0	1	0	0	0	0	0	0	1	0	0	0	0	1	1	0	0	1	1	2	1	0	0	0	0	0	1	0	0	0	0
*|AJW47815.1|UB21_00620|ARN04845.1|BJM02_00620|hypothetical protein	0	0	0	0	0	0	0	0	0	0	0	0	0	0	0	0	0	0	0	0	0	0	0	0	0	0	0	0	0	0	0	0	0	0	0	0
*|AJW47843.1|UB21_00830 |*|*|histidine kinase	0	0	0	0	0	0	0	0	0	0	0	0	0	0	0	0	0	0	0	0	0	0	0	0	0	0	0	0	0	0	0	0	0	0	0	0
*|AJW47915.1|UB21_01290 |*|*|3-ketoacyl-ACP reductase	0	2	0	0	0	0	0	0	0	0	0	0	0	0	2	0	0	0	2	0	0	0	0	0	0	0	0	0	0	0	0	0	0	0	0	0
*|AJW47921.1|UB21_01320 |*|*|succinate dehydrogenase	4	0	0	0	0	0	0	0	2	0	2	2	0	0	0	0	0	0	2	0	0	0	1	0	2	0	1	0	0	0	0	0	0	0	0	0
*|AJW47949.1|UB21_01470|ARN04983.1|BJM02_01455|antitoxin	0	1	0	0	0	0	0	0	0	0	0	0	0	0	0	0	0	0	0	0	0	0	0	0	0	0	0	0	0	0	0	0	0	0	0	0
*|AJW47950.1|UB21_01480 |*|*|hypothetical protein	0	0	0	0	1	0	0	0	0	0	0	0	0	1	0	0	1	1	1	0	1	1	0	0	0	2	1	1	0	0	0	0	0	0	0	0
*|AJW47951.1|UB21_01485 |*|*|hypothetical protein	1	1	0	2	0	0	0	1	0	0	1	0	0	0	0	0	0	0	1	0	0	0	0	0	0	0	0	1	1	1	0	0	0	0	0	0
*|AJW47967.1|UB21_01580 |*|*|PE-PGRS family protein	0	0	1	1	0	0	0	0	0	0	0	0	0	0	0	0	0	0	0	0	2	0	0	0	0	0	1	1	0	0	0	0	0	0	0	0
*|AJW48012.1|UB21_01840 |*|*|molecular chaperone DnaK	3	0	2	0	0	2	0	0	2	1	0	2	0	2	0	0	2	1	0	0	0	4	0	2	0	2	4	0	0	0	2	0	0	2	2	0
*|AJW48028.1|UB21_01925 |*|*|hypothetical protein	0	0	0	0	0	0	0	0	0	0	0	0	0	0	0	0	0	0	0	0	0	0	1	0	0	0	0	0	0	0	0	0	0	0	0	0
*|AJW48068.1|UB21_02175 |*|*|thiazole synthase	0	0	0	0	0	0	0	0	0	0	0	0	0	0	0	0	0	0	0	0	0	0	0	0	0	0	0	0	0	0	2	0	0	0	0	0
*|AJW48084.1|UB21_02265 |*|*|XRE family transcriptional regulator	0	0	0	0	0	0	0	0	0	0	0	0	0	0	0	0	0	0	0	0	0	0	0	0	0	0	0	0	0	0	0	0	0	0	0	0
*|AJW48089.1|UB21_02295 |*|*|molecular chaperone GroEL	4	0	2	3	4	2	4	2	4	3	0	8	0	0	2	2	8	2	6	12	20	12	10	20	0	2	0	0	0	0	4	0	1	2	0	0
*|AJW48103.1|UB21_02365|ARN05138.1|BJM02_02340|hypothetical protein	0	0	0	0	0	0	0	0	0	0	0	0	0	0	0	0	0	0	0	0	0	0	0	0	0	2	0	0	0	0	0	0	0	0	0	0
*|AJW48132.1|UB21_02520 |*|*|UDP-N-acetylenolpyruvoylglucosamine reductase	0	0	0	0	0	0	0	0	0	0	0	0	0	0	0	0	0	0	0	0	2	0	0	0	0	0	0	0	0	0	0	0	0	0	0	0
*|AJW48136.1|UB21_02555 |*|*|phosphoglyceromutase	0	0	0	0	0	0	0	0	0	0	0	0	0	0	0	0	0	2	0	0	0	0	0	2	0	0	0	0	0	0	0	0	0	0	0	0
*|AJW48237.1|UB21_03190|ARN05277.1|BJM02_03165|hypothetical protein	0	0	0	0	0	0	0	0	0	0	0	0	0	0	0	0	0	0	0	0	0	0	0	0	0	0	0	0	0	0	0	0	0	0	0	0
*|AJW48292.1|UB21_03520|ARN08283.1|BJM02_03495|hypothetical protein	0	0	0	0	0	0	0	0	0	0	0	0	0	0	0	0	0	0	0	0	0	0	0	0	0	0	0	0	0	0	0	0	0	0	0	0
*|AJW48305.1|UB21_03600 |*|*|elongation factor G	2	1	1	2	2	0	0	1	4	0	4	0	0	3	4	4	2	3	0	0	0	0	2	0	2	0	0	4	2	0	2	0	0	0	0	2
*|AJW48313.1|UB21_03640|ARN05353.1|BJM02_03615|mycofactocin precursor	0	0	0	0	1	0	0	0	0	0	0	0	0	0	0	0	0	0	0	0	0	0	0	0	0	0	0	0	0	0	0	0	0	0	0	0
*|AJW48322.1|UB21_03685|ARN05361.1|BJM02_03660|hypothetical protein	0	0	0	0	0	0	0	0	0	0	0	0	0	0	0	0	0	0	2	0	0	0	0	2	0	0	1	0	0	1	0	0	0	0	0	0
*|AJW48339.1|UB21_03775 |*|*|30S ribosomal protein S14	0	0	0	0	0	0	0	0	0	0	0	2	0	0	0	0	0	0	0	0	0	0	2	2	2	0	0	0	0	2	0	0	0	0	0	0
*|AJW48362.1|UB21_03915|ARN05403.1|BJM02_03890|3-hydroxyisobutyryl-CoA hydrolase	0	0	0	0	0	0	0	0	0	0	0	0	0	0	0	0	0	0	0	0	0	0	0	0	0	0	0	0	0	0	0	0	0	0	0	0
*|AJW48364.1|UB21_03940 |*|*|PE-PGRS family protein	0	0	0	0	0	0	0	0	0	0	0	0	0	0	0	0	0	0	0	0	0	0	0	0	0	0	0	0	0	0	0	0	0	0	0	0
*|AJW48400.1|UB21_04130|ARN05441.1|BJM02_04105|transcriptional regulator	0	0	0	0	0	0	0	0	0	0	0	0	0	0	0	0	0	0	0	0	0	0	0	0	0	0	0	0	0	0	0	0	0	0	0	0
*|AJW48413.1|UB21_04200 |*|*|transposase	0	0	0	0	0	0	0	0	0	0	0	0	0	0	0	0	0	0	0	0	0	0	0	0	0	0	0	0	0	0	0	0	0	0	0	0
*|AJW48414.1|UB21_04205 |*|*|transposase	0	0	0	0	0	0	0	0	0	0	0	0	0	0	0	0	0	0	0	0	0	0	0	0	0	0	0	0	0	0	0	0	0	0	0	0
*|AJW48415.1|UB21_04210|ARN08292.1|BJM02_04185|transposase	0	0	0	0	0	0	0	0	0	0	0	0	0	0	0	0	0	0	0	0	0	0	0	0	0	0	0	0	0	0	0	0	0	0	0	0
*|AJW48431.1|UB21_04300 |*|*|membrane protein	0	0	0	0	0	0	0	0	0	0	0	0	0	0	0	1	0	0	0	0	0	0	0	0	0	0	0	0	0	0	0	0	0	0	0	0
*|AJW48436.1|UB21_04335 |*|*|phosphate ABC transporter ATP-binding protein	0	0	0	0	0	0	0	0	0	0	0	0	0	0	0	0	1	0	0	0	0	0	0	0	0	0	0	0	0	1	2	0	0	0	0	0
*|AJW48451.1|UB21_04470 |*|*|hypothetical protein	0	0	0	0	0	0	0	0	0	0	0	0	0	0	0	0	0	0	0	0	0	0	0	0	0	0	0	0	0	0	0	0	0	0	0	0
*|AJW48476.1|UB21_04625 |*|*|hypothetical protein	0	0	0	0	0	0	0	0	0	0	0	0	0	0	0	0	0	0	0	0	0	0	0	0	0	0	0	0	0	0	0	0	0	0	0	0
*|AJW48477.1|UB21_04630 |*|*|PE family protein	0	0	0	0	0	0	0	0	0	0	0	0	0	0	0	0	0	0	0	0	0	0	0	0	0	0	3	0	0	0	0	0	0	0	0	0
*|AJW48493.1|UB21_04730|ARN05531.1|BJM02_04695|hypothetical protein	0	0	0	0	0	0	0	0	0	0	0	0	0	0	0	0	0	0	0	0	0	0	0	0	0	0	0	0	0	0	0	0	0	0	0	0
*|AJW48509.1|UB21_04840|ARN05549.1|BJM02_04805|hypothetical protein	0	0	0	2	0	0	0	0	0	0	0	0	0	0	0	0	0	0	0	0	0	0	0	0	0	0	0	0	0	0	0	0	0	0	0	0
*|AJW48514.1|UB21_04870|ARN05555.1|BJM02_04835|hypothetical protein	0	0	0	0	0	0	0	0	0	0	0	0	0	0	0	0	0	0	0	0	0	0	0	0	0	0	0	0	0	0	0	0	0	0	0	0
*|AJW48536.1|UB21_05025|ARN05577.1|BJM02_04990|mycolyltransferase	0	0	0	0	0	0	0	0	0	0	0	0	0	0	0	0	0	0	0	0	0	0	0	0	0	0	0	0	0	0	0	0	0	0	0	0
*|AJW48576.1|UB21_05295|ARN05618.1|BJM02_05260|hypothetical protein	0	0	0	0	0	0	0	0	0	0	0	0	0	0	0	0	0	0	0	0	0	0	0	0	0	0	0	0	2	0	0	0	0	0	0	0
*|AJW48577.1|UB21_05300|ARN05619.1|BJM02_05265|methyltransferase	0	0	0	0	0	0	0	0	0	0	0	0	0	0	0	0	0	0	0	0	0	0	0	0	0	0	0	0	0	0	0	0	0	0	0	0
*|AJW48578.1|UB21_05305|ARN05620.1|BJM02_05270|methyltransferase	0	0	0	0	0	0	0	0	0	0	0	0	0	0	0	1	0	0	0	0	0	0	0	0	0	0	0	0	0	0	0	0	0	0	0	0
*|AJW48602.1|UB21_05470|ARN05648.1|BJM02_05435|potassium transporter Trk	0	0	0	0	0	0	0	0	0	0	0	1	0	0	0	0	0	0	0	0	0	0	0	0	0	0	0	0	0	0	0	0	0	0	0	0
*|AJW48615.1|UB21_05540|ARN05661.1|BJM02_05505|hypothetical protein	0	0	0	0	0	0	0	0	0	0	0	0	0	0	0	0	0	0	0	0	0	0	0	0	0	0	0	0	0	0	0	0	0	0	0	0
*|AJW48619.1|UB21_05565|ARN05665.1|BJM02_05530|hypothetical protein	0	0	0	0	0	0	0	0	0	0	0	0	0	0	0	0	0	0	0	0	0	0	0	0	0	0	0	0	0	0	0	0	0	0	0	0
*|AJW48624.1|UB21_05590|ARN05670.1|BJM02_05555|hypothetical protein	0	0	0	0	0	0	0	0	0	0	0	0	0	0	0	0	0	0	0	0	0	0	0	0	0	0	0	0	0	0	0	0	0	0	0	0
*|AJW48627.1|UB21_05610|ARN05673.1|BJM02_05575|hypothetical protein	0	0	0	0	0	0	0	0	0	0	0	0	0	0	0	0	0	0	0	0	0	0	0	0	0	0	0	0	0	0	0	0	0	0	0	0
*|AJW48630.1|UB21_05625|ARN05676.1|BJM02_05590|hypothetical protein	0	0	0	0	0	0	0	0	2	0	1	0	0	0	0	0	0	0	0	0	0	0	0	0	0	0	0	0	0	0	0	0	0	0	0	0
*|AJW48655.1|UB21_05815|ARN05705.1|BJM02_05780|PE family protein	0	0	0	0	0	0	0	0	0	0	0	0	0	0	0	0	0	0	0	0	0	0	0	0	0	0	0	0	0	0	0	0	0	0	0	0
*|AJW48656.1|UB21_05820|ARN05706.1|BJM02_05785|1,4-beta-glucanase	0	0	0	0	0	0	0	0	0	0	0	0	0	0	0	0	0	0	0	0	0	0	0	0	0	0	0	0	0	0	0	0	0	0	0	0
*|AJW48665.1|UB21_05870 |*|*|aspartate ammonia-lyase	0	0	0	0	0	0	0	0	0	0	0	0	0	0	0	0	0	0	0	0	0	0	0	0	0	0	0	0	0	0	0	0	0	0	0	0
*|AJW48694.1|UB21_06065 |*|*|transposase	0	0	0	0	0	0	0	0	0	0	0	0	0	0	0	0	0	0	0	0	1	0	0	0	0	0	0	0	0	0	1	0	0	0	2	0
*|AJW48695.1|UB21_06070 |*|*|transposase	0	0	0	0	0	0	0	0	0	0	0	0	0	0	0	0	0	0	0	0	0	0	0	0	0	0	0	0	0	0	0	0	0	0	0	0
*|AJW48696.1|UB21_06075|ARN05747.1|BJM02_06040|hypothetical protein	0	0	0	0	0	0	0	0	0	0	0	0	0	0	0	0	0	0	0	0	0	0	0	0	0	0	0	0	0	0	0	0	0	0	0	0
*|AJW48699.1|UB21_06090|ARN05750.1|BJM02_06055|enoyl-CoA hydratase	0	0	0	0	0	0	0	0	0	0	0	0	0	0	0	0	0	0	0	0	0	0	0	0	0	0	0	0	0	0	0	0	0	0	0	0
*|AJW48707.1|UB21_06140|ARN05758.1|BJM02_06105|hypothetical protein	0	0	0	0	0	0	0	0	0	0	0	0	0	0	0	0	0	0	0	0	0	0	0	0	0	0	0	0	0	0	0	0	0	0	0	0
*|AJW48708.1|UB21_06145|ARN05759.1|BJM02_06110|hypothetical protein	0	0	0	0	0	0	0	0	0	0	0	0	0	0	0	0	0	0	0	0	0	0	0	0	0	0	0	2	0	0	0	0	0	0	0	0
*|AJW48710.1|UB21_06155 |*|*|transposase	0	0	0	0	0	0	0	0	0	0	1	0	0	0	0	0	0	0	0	0	0	0	0	0	0	0	1	0	0	0	2	0	0	0	0	0
*|AJW48711.1|UB21_06160 |*|*|transposase	0	0	0	0	0	0	0	0	0	0	0	0	0	0	0	0	0	0	0	0	0	0	0	0	0	0	0	0	0	0	0	0	0	0	0	0
*|AJW48720.1|UB21_06210 |*|*|mannosyltransferase	2	0	0	0	0	0	0	0	0	0	0	0	2	0	0	0	1	0	0	0	0	0	0	0	2	0	0	0	0	0	0	0	0	0	0	0
*|AJW48724.1|UB21_06230 |*|*|nitrate reductase	0	0	0	0	1	0	0	0	0	0	0	0	0	0	0	0	0	0	0	0	0	1	0	0	0	0	0	0	0	2	0	0	0	2	0	0
*|AJW48743.1|UB21_06360 |*|*|RNA polymerase sigma factor SigI	0	0	0	0	0	0	0	0	0	0	0	0	0	0	0	0	0	0	0	0	0	0	0	0	0	0	0	0	0	0	0	0	0	0	0	0
*|AJW48749.1|UB21_06400 |*|*|peptidase M22	0	1	0	0	0	0	0	0	1	1	1	0	0	1	0	0	1	0	0	0	0	0	0	0	0	0	0	0	0	0	0	2	1	0	0	1
*|AJW48750.1|UB21_06405 |*|*|type VII secretion protein EsxI	2	0	4	0	2	2	0	0	0	0	0	0	0	1	0	0	0	0	0	0	0	0	0	0	0	0	0	0	0	0	0	0	0	0	1	0
*|AJW48779.1|UB21_06580 |*|*|membrane protein	0	0	0	0	0	0	0	0	0	0	0	0	0	0	0	0	0	0	0	0	0	0	0	0	0	0	0	0	0	0	0	0	0	0	0	0
*|AJW48792.1|UB21_06660 |*|*|alpha-ketoglutarate decarboxylase	2	0	0	0	0	0	2	0	0	2	2	2	0	0	0	0	0	0	0	0	0	0	2	4	0	0	0	0	0	1	0	0	0	2	0	0
*|AJW48802.1|UB21_06710|ARN05852.1|BJM02_06680|MFS transporter	0	0	0	0	0	0	0	0	0	0	0	0	0	0	0	0	0	0	0	0	0	0	0	0	0	0	0	0	0	0	0	0	0	0	0	0
*|AJW48803.1|UB21_06715|ARN05853.1|BJM02_06685|MFS transporter	2	0	0	0	0	0	0	0	0	0	0	0	0	0	0	0	0	0	0	0	0	0	0	0	0	0	0	0	0	0	0	0	0	0	0	0
*|AJW48835.1|UB21_06915|ARN05887.1|BJM02_06885|transcription termination factor Rho	0	0	0	0	0	0	0	0	0	0	0	0	0	0	0	0	0	0	0	0	0	0	0	0	0	1	0	0	0	0	0	0	0	0	0	0
*|AJW48849.1|UB21_07005 |*|*|hypothetical protein	0	0	0	1	0	0	0	0	0	0	0	0	0	0	0	0	0	0	0	0	0	0	0	0	0	0	0	0	0	0	0	1	0	0	0	1
*|AJW48855.1|UB21_07050|ARN05908.1|BJM02_07015|hypothetical protein	1	0	0	0	0	0	0	0	0	0	0	0	0	0	0	0	0	0	0	0	0	0	0	0	0	0	1	0	0	0	0	0	0	0	0	0
*|AJW48863.1|UB21_07090 |*|*|hypothetical protein	0	0	0	0	0	0	0	0	0	0	0	0	0	0	0	0	0	0	0	0	0	0	0	0	0	0	0	0	0	0	0	0	0	0	0	0
*|AJW48872.1|UB21_07150 |*|*|cysteine synthase	0	0	0	0	0	0	0	0	0	0	0	0	0	0	2	0	0	0	0	0	0	0	0	1	0	0	0	0	0	0	0	0	0	0	0	0
*|AJW48876.1|UB21_07170 |*|*|ribonuclease PH	0	0	0	0	0	0	0	0	0	0	0	0	0	0	0	0	0	0	0	0	0	2	0	2	0	0	2	2	0	0	0	0	0	0	0	0
*|AJW48893.1|UB21_07275|ARN05949.1|BJM02_07240|hypothetical protein	0	0	0	0	0	0	0	0	0	0	0	0	0	0	0	0	0	0	0	0	0	0	0	0	0	0	0	0	0	0	0	0	0	0	0	0
*|AJW48904.1|UB21_07335 |*|*|transposase	0	0	0	0	0	0	0	0	0	0	0	0	0	0	0	0	0	0	0	0	0	0	0	0	0	0	0	0	0	0	0	0	0	0	0	0
*|AJW48905.1|UB21_07340 |*|*|transposase	0	0	0	0	0	0	0	0	0	1	0	0	0	0	0	0	0	0	0	0	0	0	0	0	0	0	0	0	0	0	0	0	0	0	0	0
*|AJW48915.1|UB21_07395 |*|*|dihydroorotase	2	0	0	0	0	0	0	0	0	0	0	0	0	0	0	0	0	0	0	0	0	0	0	0	0	0	0	0	0	0	0	0	0	0	0	0
*|AJW48918.1|UB21_07410 |*|*|carbamoyl phosphate synthase large subunit	0	0	0	0	0	0	0	0	0	0	2	2	1	0	0	0	0	0	1	0	0	0	0	0	0	0	0	0	0	0	0	0	0	0	0	2
*|AJW48921.1|UB21_07430|ARN05977.1|BJM02_07395|hypothetical protein	0	0	0	0	0	0	0	0	1	0	0	0	0	0	0	0	0	0	0	0	0	2	0	0	0	0	0	2	0	0	0	0	0	0	0	0
*|AJW48960.1|UB21_07685 |*|*|phosphoglycerate kinase	0	0	0	0	0	0	0	0	0	0	0	0	0	0	2	2	0	0	0	0	0	1	0	0	0	0	0	2	0	0	0	0	0	0	0	0
*|AJW48962.1|UB21_07695|ARN06017.1|BJM02_07655|transcriptional regulator	0	0	0	0	0	0	0	0	0	0	0	0	0	0	0	0	0	0	0	0	0	0	0	0	0	0	0	0	0	0	0	0	0	0	0	0
*|AJW48965.1|UB21_07710 |*|*|hypothetical protein	5	7	15	8	6	6	1	7	2	1	2	2	1	1	0	0	5	13	8	11	6	2	0	0	4	0	3	7	4	3	3	2	1	1	0	1
*|AJW48967.1|UB21_07725|ARN06022.1|BJM02_07685|hypothetical protein	0	0	0	0	0	0	0	0	0	0	0	0	0	0	0	0	0	0	0	0	0	0	0	0	0	0	0	0	0	0	0	0	0	0	0	0
*|AJW48983.1|UB21_07825 |*|*|cysteine desulfurase	1	0	0	1	0	0	0	0	0	0	0	0	2	0	0	2	0	0	0	0	2	0	0	0	2	2	0	2	0	0	0	1	0	1	0	0
*|AJW48988.1|UB21_07855 |*|*|transposase	0	0	0	0	0	0	0	0	0	0	0	0	0	0	0	0	0	0	0	0	0	0	0	0	0	0	0	0	0	0	0	0	0	0	0	0
*|AJW48989.1|UB21_07860 |*|*|transposase	0	0	0	0	0	0	0	0	0	0	0	0	0	0	1	0	0	0	0	0	0	0	0	0	0	0	0	0	0	0	0	0	0	0	0	0
*|AJW48997.1|UB21_07900 |*|*|aconitate hydratase	0	0	0	4	2	0	0	0	0	0	0	0	2	2	0	0	0	2	0	0	0	0	0	0	0	0	0	0	2	0	0	0	4	0	0	0
*|AJW49066.1|UB21_08300|ARN06121.1|BJM02_08265|hypothetical protein	0	0	0	0	0	0	0	0	0	0	0	0	0	0	0	0	0	0	0	0	0	0	0	0	0	0	0	0	0	0	0	0	0	0	0	0
*|AJW49084.1|UB21_08415 |*|*|hypothetical protein	0	0	0	0	0	0	0	0	0	0	1	0	0	0	0	0	0	0	0	0	0	0	0	0	0	0	0	0	0	0	0	0	0	0	0	0
*|AJW49122.1|UB21_08630 |*|*|30S ribosomal protein S1	2	2	0	0	0	0	0	2	4	0	4	0	0	2	2	2	0	0	0	0	0	2	2	2	0	4	0	2	2	0	2	0	2	2	2	0
*|AJW49123.1|UB21_08635 |*|*|dephospho-CoA kinase	0	2	0	2	0	0	0	0	0	0	1	0	0	0	0	0	0	0	0	0	0	0	0	0	2	0	0	0	0	0	0	0	0	0	0	1
*|AJW49128.1|UB21_08685 |*|*|lysine--tRNA ligase	0	0	0	0	0	0	0	2	0	0	0	0	2	0	0	2	0	0	0	2	0	0	0	0	2	0	0	0	0	0	2	1	0	0	0	0
*|AJW49174.1|UB21_08955 |*|*|inorganic polyphosphate kinase	0	0	0	0	0	0	0	0	0	0	0	0	0	0	0	0	0	0	0	0	0	0	0	0	0	0	0	0	0	0	0	0	0	0	0	2
*|AJW49191.1|UB21_09050 |*|*|GTP-binding protein Der	0	0	0	0	0	0	0	0	0	0	0	0	0	0	1	0	0	0	0	1	0	0	0	0	0	0	0	0	0	0	0	0	0	0	0	0
*|AJW49198.1|UB21_09090|ARN06257.1|BJM02_09045|transposase	0	0	0	0	0	0	0	0	0	0	0	0	0	0	0	0	0	0	0	0	0	0	0	0	0	0	0	0	0	0	0	0	0	0	0	0
*|AJW49207.1|UB21_09150|ARN06266.1|BJM02_09105|hypothetical protein	0	0	0	0	0	0	0	0	0	0	0	0	0	0	0	0	1	0	0	0	0	0	0	0	0	0	0	0	0	0	0	0	0	0	0	1
*|AJW49213.1|UB21_09185|ARN06272.1|BJM02_09140|hypothetical protein	0	0	0	0	0	0	0	0	0	0	0	0	0	0	0	0	0	0	0	0	0	0	0	0	0	0	0	0	0	0	0	0	0	0	0	0
*|AJW49228.1|UB21_09285 |*|*|transposase	0	0	0	0	0	0	0	0	0	0	0	0	0	0	0	0	0	0	0	0	0	1	0	0	1	0	0	0	0	0	0	0	0	0	1	0
*|AJW49229.1|UB21_09290 |*|*|transposase	0	0	0	0	0	0	0	0	0	0	0	0	0	0	0	0	0	0	0	0	0	0	0	0	0	0	0	0	0	0	0	0	0	0	0	0
*|AJW49248.1|UB21_09425|ARN06312.1|BJM02_09380|esat-6	0	0	1	0	0	0	0	0	1	0	0	1	0	0	0	0	1	0	0	0	0	1	0	1	1	0	0	0	0	1	0	0	1	2	1	0
*|AJW49273.1|UB21_09570 |*|*|preprotein translocase subunit SecA	0	0	0	2	0	0	0	0	0	0	0	0	0	0	2	0	0	0	0	0	0	0	2	0	2	0	2	2	4	2	2	0	2	0	0	0
*|AJW49289.1|UB21_09665 |*|*|PE-PGRS family protein	1	1	2	0	0	0	0	0	0	0	0	0	0	0	0	0	1	0	1	0	0	0	0	0	0	0	0	0	0	0	0	0	0	0	0	0
*|AJW49299.1|UB21_09720 |*|*|urease subunit alpha	0	0	0	0	0	0	0	0	0	0	1	0	0	0	0	0	0	2	0	0	0	0	0	0	0	0	0	0	0	0	0	0	0	0	0	0
*|AJW49349.1|UB21_10055 |*|*|transposase	0	0	0	0	0	0	0	0	0	0	0	0	0	0	0	0	0	0	0	0	0	0	0	0	0	0	0	0	0	0	0	0	0	0	0	0
*|AJW49350.1|UB21_10060 |*|*|transposase	0	0	0	0	0	0	0	0	0	0	0	0	0	0	0	0	0	0	0	0	0	0	0	0	0	0	0	0	0	0	0	0	0	0	0	0
*|AJW49374.1|UB21_10205 |*|*|hypothetical protein	0	0	0	0	0	0	0	0	3	0	0	0	0	0	0	0	0	0	2	0	0	0	0	0	0	0	0	0	0	0	0	0	0	0	0	0
*|AJW49377.1|UB21_10220|ARN06450.1|BJM02_10165|hypothetical protein	0	0	0	0	0	0	0	0	0	0	0	0	0	0	0	0	0	0	0	0	0	0	0	0	1	0	0	0	0	0	0	0	0	0	0	0
*|AJW49394.1|UB21_10310|ARN06467.1|BJM02_10255|hypothetical protein	0	0	0	0	0	0	0	0	0	0	0	0	0	0	0	0	0	0	0	0	0	0	0	0	0	0	0	0	0	0	0	0	0	0	0	0
*|AJW49406.1|UB21_10385|ARN06479.1|BJM02_10330|PE family protein	0	0	0	0	0	0	0	0	0	0	0	0	0	0	1	0	0	0	2	0	0	0	0	0	2	0	0	0	0	0	2	0	2	2	0	0
*|AJW49407.1|UB21_10390|ARN06480.1|BJM02_10335|hypothetical protein	0	0	0	0	0	0	0	0	0	0	0	0	0	0	0	0	0	0	0	0	0	0	0	0	0	0	0	0	0	0	0	0	0	0	0	0
*|AJW49408.1|UB21_10395|ARN06481.1|BJM02_10340|hypothetical protein	0	0	0	0	0	0	0	0	0	0	0	0	0	0	0	0	0	0	0	0	0	0	0	0	0	0	0	0	0	0	0	0	0	0	0	0
*|AJW49409.1|UB21_10400|ARN06482.1|BJM02_10345|hypothetical protein	0	0	0	0	0	0	0	0	0	0	0	0	1	0	0	0	0	0	0	0	0	0	0	0	0	0	0	0	0	0	2	0	0	0	0	0
*|AJW49410.1|UB21_10405|ARN06483.1|BJM02_10350|elongation factor Tu	0	0	0	0	0	0	0	0	0	0	0	0	0	0	0	0	0	0	0	0	2	0	0	0	0	0	0	0	0	0	0	0	0	0	0	0
*|AJW49411.1|UB21_10410|ARN06484.1|BJM02_10355|dehydrogenase	0	0	0	0	0	0	0	0	0	0	0	0	0	0	0	0	0	0	0	0	0	0	0	0	0	0	0	0	0	0	0	0	0	0	0	0
*|AJW49419.1|UB21_10460|ARN06492.1|BJM02_10405|hypothetical protein	0	0	0	0	0	0	0	0	2	0	0	0	0	0	0	0	0	0	1	0	0	2	0	0	0	0	0	0	0	0	0	0	0	0	0	0
*|AJW49426.1|UB21_10495|ARN06499.1|BJM02_10440|hypothetical protein	0	0	0	0	0	0	0	0	0	0	0	0	0	0	0	0	0	0	0	0	0	0	0	0	0	0	0	0	0	0	0	0	0	0	2	0
*|AJW49448.1|UB21_10645 |*|*|transposase	0	0	0	0	0	0	0	0	0	0	0	0	0	0	0	0	0	0	0	0	0	0	0	0	0	0	0	0	0	0	1	0	0	0	0	0
*|AJW49449.1|UB21_10650 |*|*|transposase	0	0	0	0	0	0	0	0	0	0	0	0	0	0	0	0	0	0	0	0	0	0	0	0	0	0	0	0	0	0	0	0	0	0	0	0
*|AJW49456.1|UB21_10695|ARN06533.1|BJM02_10635|hypothetical protein	0	0	0	0	0	0	0	0	0	0	0	0	0	0	0	0	0	0	0	0	0	0	0	0	0	0	0	0	0	0	0	0	0	0	0	0
*|AJW49457.1|UB21_10700|ARN06534.1|BJM02_10640|hypothetical protein	0	0	0	0	0	0	0	0	0	0	0	0	0	0	0	0	0	0	0	0	0	0	0	0	0	0	0	0	0	0	0	0	0	0	0	0
*|AJW49458.1|UB21_10705|ARN06535.1|BJM02_10645|hypothetical protein	0	0	0	0	0	0	0	0	0	0	0	0	0	0	0	0	0	0	0	0	0	0	0	0	0	2	0	0	0	0	0	0	0	0	0	0
*|AJW49489.1|UB21_10905 |*|*|cobalamin biosynthesis protein CobN	1	0	0	0	0	0	0	0	0	0	0	1	0	0	0	0	0	0	2	0	0	0	0	0	0	0	0	2	0	0	0	0	4	0	0	0
*|AJW49507.1|UB21_11015|ARN06584.1|BJM02_10955|hypothetical protein	0	0	0	0	0	0	0	0	0	0	0	0	0	0	0	0	0	0	0	0	0	0	0	0	0	0	0	0	0	0	0	0	0	0	0	0
*|AJW49525.1|UB21_11130|ARN06604.1|BJM02_11075|hypothetical protein	0	0	0	0	0	0	0	0	0	0	0	0	0	0	0	0	0	0	0	0	0	0	0	0	0	0	0	0	0	0	0	0	0	0	0	0
*|AJW49526.1|UB21_11135 |*|*|transposase	0	0	0	0	0	0	0	0	0	0	0	0	0	0	0	0	0	0	0	0	0	0	0	0	0	0	0	0	0	0	0	0	0	0	0	0
*|AJW49527.1|UB21_11140 |*|*|transposase	0	0	0	0	0	0	0	0	0	0	0	0	0	0	0	0	0	0	0	0	0	0	0	0	0	0	0	0	0	0	0	0	0	0	1	0
*|AJW49541.1|UB21_11225 |*|*|phosphoribosyl-ATP pyrophosphatase	0	0	0	0	0	0	0	0	0	0	0	0	0	0	0	0	0	0	0	0	0	0	0	0	0	0	0	0	0	0	0	0	0	0	0	0
*|AJW49542.1|UB21_11230|ARN06622.1|BJM02_11175|hypothetical protein	0	0	1	0	0	0	0	0	0	0	0	0	0	0	0	0	0	0	0	0	0	0	0	0	2	0	0	0	0	0	0	0	0	0	0	2
*|AJW49546.1|UB21_11250 |*|*|hypothetical protein	0	1	1	0	0	0	1	0	0	0	0	0	0	0	0	0	1	2	1	0	0	0	0	0	1	1	0	0	0	0	1	1	0	0	0	0
*|AJW49547.1|UB21_11255|ARN06626.1|BJM02_11200|hypothetical protein	0	0	0	0	0	0	0	0	0	0	0	0	0	0	0	0	0	0	0	0	0	0	0	0	0	0	0	0	0	0	0	0	0	0	0	0
*|AJW49557.1|UB21_11320|ARN06637.1|BJM02_11265|dihydroorotate dehydrogenase	2	0	0	0	0	0	0	0	0	0	0	0	0	0	0	0	0	0	0	0	0	0	0	2	0	0	0	0	0	0	0	0	0	0	0	1
*|AJW49622.1|UB21_11765|ARN06713.1|BJM02_11715|acyltransferase	0	0	0	0	0	0	0	0	0	0	0	0	0	0	0	0	0	0	0	0	0	0	0	0	0	0	0	0	0	0	0	0	0	0	0	0
*|AJW49648.1|UB21_11940|ARN06741.1|BJM02_11895|transcriptional regulator	0	0	0	0	0	0	0	0	0	0	0	0	0	0	0	0	0	0	0	0	0	0	0	0	0	0	0	0	0	0	0	0	0	0	0	0
*|AJW49666.1|UB21_12065|ARN06764.1|BJM02_12020|hypothetical protein	0	0	0	0	0	0	0	0	0	0	0	0	0	0	0	0	0	0	0	0	0	0	0	0	0	0	0	0	0	0	0	0	0	0	0	0
*|AJW49685.1|UB21_12200|ARN06785.1|BJM02_12155|hypothetical protein	0	0	0	0	0	0	0	0	0	0	0	0	0	0	0	0	0	0	0	0	0	0	0	0	0	0	0	0	0	0	0	0	0	0	0	0
*|AJW49687.1|UB21_12210|ARN06787.1|BJM02_12165|hypothetical protein	0	0	0	0	0	0	0	0	0	0	0	0	0	0	0	0	0	0	0	0	0	0	0	0	0	0	0	0	0	0	0	0	0	0	0	0
*|AJW49698.1|UB21_12280|ARN06798.1|BJM02_12235|hypothetical protein	0	0	0	0	0	0	0	0	0	0	0	0	0	0	0	0	0	0	0	0	0	0	0	0	0	0	0	0	0	0	0	0	0	0	0	0
*|AJW49707.1|UB21_12330|ARN06807.1|BJM02_12285|hypothetical protein	0	0	0	0	0	0	0	0	0	0	0	0	0	0	0	0	0	0	0	0	0	0	0	0	0	0	0	0	0	0	0	0	0	0	0	0
*|AJW49721.1|UB21_12435 |*|*|type VII secretion protein EsxI	0	0	1	0	0	0	0	0	0	0	0	2	0	2	1	0	0	0	0	0	0	0	0	0	0	0	0	0	0	0	2	0	0	0	0	2
*|AJW49722.1|UB21_12440 |*|*|peptidase M22	0	0	1	0	0	0	1	0	0	0	0	0	0	0	2	0	0	1	0	0	0	1	0	0	0	0	0	0	0	1	0	0	0	0	0	0
*|AJW49727.1|UB21_12470 |*|*|transposase	0	0	0	0	0	0	0	0	0	0	0	0	0	0	0	0	0	0	0	0	0	0	0	0	0	0	0	0	0	0	0	0	0	0	0	0
*|AJW49728.1|UB21_12475 |*|*|transposase	0	0	0	0	0	0	0	0	0	0	0	0	0	0	0	0	0	0	0	0	0	0	0	0	0	0	0	0	0	0	0	0	0	0	0	0
*|AJW49729.1|UB21_12480 |*|*|PPE family protein	0	0	0	0	0	0	0	0	0	0	0	0	0	0	0	0	0	0	0	0	0	0	0	0	0	0	0	0	0	0	0	0	0	0	1	0
*|AJW49730.1|UB21_12485 |*|*|hypothetical protein	0	0	0	1	1	1	0	0	0	0	0	0	0	0	0	0	1	1	0	0	0	1	0	0	3	1	3	1	0	1	0	1	0	0	0	0
*|AJW49731.1|UB21_12490 |*|*|hypothetical protein	1	0	0	0	0	0	0	0	0	1	0	0	0	0	0	0	1	2	1	3	2	0	1	0	4	1	1	2	0	0	0	0	0	0	0	3
*|AJW49773.1|UB21_12755 |*|*|hypothetical protein	0	0	0	0	0	0	0	0	0	0	0	0	0	0	0	0	0	0	0	0	0	0	0	0	0	0	0	0	0	0	0	0	1	0	0	0
*|AJW49776.1|UB21_12775|ARN06879.1|BJM02_12725|hypothetical protein	0	0	0	0	0	0	0	0	0	0	0	0	0	0	0	0	0	0	0	0	0	0	0	0	0	0	0	0	0	0	0	0	0	0	0	0
*|AJW49788.1|UB21_12845|ARN06891.1|BJM02_12795|hypothetical protein	0	0	0	0	0	0	0	0	0	0	0	0	0	0	0	0	0	0	0	0	0	0	0	0	0	0	0	1	0	0	0	0	0	0	0	0
*|AJW49792.1|UB21_12880 |*|*|gamma-glutamyl phosphate reductase	0	0	0	0	0	0	0	0	0	0	0	0	0	0	0	0	0	0	0	0	0	0	0	0	0	0	0	0	0	0	0	0	0	0	0	0
*|AJW49793.1|UB21_12885|ARN06896.1|BJM02_12835|LysR family transcriptional regulator	0	0	0	0	0	0	0	0	0	0	0	0	0	0	0	0	0	0	0	0	0	0	0	0	0	0	0	0	0	0	0	0	0	0	0	1
*|AJW49794.1|UB21_12890|ARN06897.1|BJM02_12840|hypothetical protein	0	0	0	0	0	0	0	0	0	0	0	0	0	0	0	0	0	0	0	0	0	0	0	1	0	0	0	0	0	0	0	0	0	0	0	0
*|AJW49801.1|UB21_12925|ARN06904.1|BJM02_12875|hypothetical protein	0	0	0	0	0	0	0	0	0	0	0	0	0	0	0	0	0	0	0	0	0	0	0	0	0	0	0	0	0	0	0	0	0	0	0	0
*|AJW49819.1|UB21_13060 |*|*|Clp protease	0	2	0	2	0	0	0	0	0	0	0	0	0	0	1	0	0	0	0	0	0	0	0	2	1	0	0	0	0	0	0	0	0	0	0	0
*|AJW49838.1|UB21_13225|ARN06948.1|BJM02_13175|hypothetical protein	0	0	0	0	0	0	0	0	0	0	0	0	0	0	0	0	0	0	0	0	0	0	0	0	0	0	0	0	0	0	0	0	0	0	0	0
*|AJW49859.1|UB21_13340 |*|*|transposase	1	1	0	0	0	0	0	0	0	0	0	0	0	0	0	0	0	0	0	0	0	0	0	0	0	0	0	0	0	0	0	0	0	0	0	0
*|AJW49860.1|UB21_13345|ARN06970.1|BJM02_13295|hypothetical protein	0	0	0	0	0	0	0	0	0	0	0	0	0	0	0	0	0	0	0	0	0	0	0	0	0	0	0	0	0	0	0	0	0	0	0	0
*|AJW49861.1|UB21_13350|ARN06971.1|BJM02_13300|hypothetical protein	0	0	0	0	0	0	0	0	0	0	0	0	0	0	0	0	0	0	0	0	0	0	0	0	0	0	0	0	0	0	0	0	0	0	0	0
*|AJW49916.1|UB21_13735 |*|*|preprotein translocase subunit YajC	0	0	0	0	0	0	0	0	0	0	0	0	0	0	0	0	0	0	0	0	2	0	0	0	0	0	0	0	0	0	0	0	0	0	0	0
*|AJW49939.1|UB21_13870 |*|*|threonine--tRNA ligase	0	0	0	0	0	0	0	0	0	0	0	0	0	0	0	0	0	0	0	0	0	2	0	0	0	0	0	0	0	0	0	0	0	0	0	0
*|AJW49941.1|UB21_13880 |*|*|PE-PGRS family protein	1	0	0	0	0	1	0	0	0	0	0	0	0	0	0	0	0	0	0	0	0	0	0	0	0	1	1	0	0	0	0	0	0	0	0	0
*|AJW49956.1|UB21_13980|ARN07083.1|BJM02_13930|hypothetical protein	0	0	0	0	0	0	0	0	0	0	0	0	0	0	0	0	0	0	0	0	0	0	0	0	0	0	0	0	0	0	0	0	0	0	0	0
*|AJW49957.1|UB21_13990 |*|*|hypothetical protein	0	0	0	0	0	0	0	0	0	0	0	0	0	0	0	0	0	0	0	0	0	0	0	0	0	0	0	0	0	0	0	0	0	0	0	0
*|AJW49958.1|UB21_13995 |*|*|hypothetical protein	2	0	0	0	0	0	0	0	0	0	0	0	0	0	0	0	0	0	0	0	0	0	0	0	0	1	0	1	0	0	0	0	0	0	0	0
*|AJW49970.1|UB21_14085|ARN07097.1|BJM02_14025|hypothetical protein	0	0	0	0	0	0	0	0	0	0	0	0	0	0	0	0	0	0	0	0	0	0	0	0	0	0	0	0	0	0	0	0	0	0	0	0
*|AJW50015.1|UB21_14365|ARN07141.1|BJM02_14305|hypothetical protein	0	0	2	0	0	0	0	0	2	0	2	2	0	0	1	0	0	0	0	0	3	0	0	0	0	2	0	1	0	0	0	5	3	0	0	0
*|AJW50040.1|UB21_14515 |*|*|DNA recombination protein RecA	0	0	0	0	0	0	0	0	0	1	0	0	0	0	0	2	0	0	0	0	0	2	0	0	0	0	0	0	2	0	0	0	0	2	0	0
*|AJW50045.1|UB21_14540 |*|*|PE-PGRS family protein	1	0	0	0	0	0	0	0	0	0	0	0	0	0	0	0	0	2	0	0	0	0	0	0	0	0	0	0	0	0	0	0	0	0	0	0
*|AJW50063.1|UB21_14670|ARN07195.1|BJM02_14615|hypothetical protein	0	0	0	0	0	0	0	0	0	0	0	0	0	0	0	0	0	0	0	0	0	0	0	0	0	0	0	0	0	0	0	0	0	0	0	0
*|AJW50087.1|UB21_14800 |*|*|tRNA pseudouridine synthase B	0	0	0	0	0	0	0	0	0	0	0	0	0	0	0	0	0	0	0	0	0	0	0	0	0	0	0	0	0	0	0	0	0	0	0	1
*|AJW50098.1|UB21_14860|ARN07232.1|BJM02_14805|histone acetyltransferase	0	0	0	0	0	0	0	0	0	0	0	0	0	0	0	0	0	0	0	0	0	0	0	0	0	0	0	0	0	0	0	0	0	0	0	0
*|AJW50104.1|UB21_14890|ARN07238.1|BJM02_14835|ISL3 family transposase	0	0	0	0	0	0	0	0	0	0	0	0	0	0	0	0	0	0	0	0	0	0	0	0	0	0	0	0	0	0	0	0	0	0	0	0
*|AJW50108.1|UB21_14910 |*|*|transposase	0	0	0	0	0	0	0	0	0	0	0	0	0	0	0	0	0	0	0	0	0	0	0	0	0	0	0	0	0	0	0	0	0	0	0	0
*|AJW50109.1|UB21_14915 |*|*|transposase	0	0	0	0	0	0	0	0	0	0	0	0	0	0	0	0	0	0	0	0	0	0	0	0	0	0	0	0	0	0	0	0	0	0	0	0
*|AJW50110.1|UB21_14920|ARN07243.1|BJM02_14865|type III-A CRISPR-associated RAMP protein Csm4	0	0	0	0	0	0	0	0	0	0	0	0	0	0	0	0	0	0	0	0	0	0	0	0	0	0	0	0	0	0	0	0	0	0	0	0
*|AJW50137.1|UB21_15110|ARN07274.1|BJM02_15055|hydrogenase nickel incorporation protein HypB	0	0	0	0	0	0	0	0	0	0	0	0	0	0	0	0	0	0	0	0	0	0	0	0	0	0	0	0	0	0	0	0	0	0	0	0
*|AJW50138.1|UB21_15115|ARN07275.1|BJM02_15060|hydrogenase nickel incorporation protein HypB	0	0	0	0	0	0	0	0	0	0	0	0	0	0	0	0	0	0	0	0	0	0	0	0	0	0	0	0	0	0	0	0	0	0	0	0
*|AJW50155.1|UB21_15210|ARN07293.1|BJM02_15155|prevent-host-death protein	0	0	0	0	0	0	0	0	0	0	0	0	0	0	0	0	0	0	0	0	0	0	0	0	0	0	0	0	0	0	0	0	0	0	0	0
*|AJW50162.1|UB21_15255 |*|*|uridylate kinase	0	0	0	0	0	0	0	0	0	0	0	0	0	0	0	0	0	0	0	0	0	0	0	0	0	0	0	0	0	0	0	0	0	0	0	0
*|AJW50179.1|UB21_15355 |*|*|50S ribosomal protein L19	0	0	0	0	0	0	0	0	0	0	0	0	0	0	2	0	0	0	0	0	0	0	1	0	0	0	0	0	0	0	2	0	0	0	0	2
*|AJW50218.1|UB21_15630|ARN07356.1|BJM02_15575|hypothetical protein	0	0	0	0	0	0	0	2	0	0	0	0	0	0	0	0	0	0	0	0	0	0	0	0	0	0	0	0	0	0	0	0	0	0	0	0
*|AJW50222.1|UB21_15670|ARN07362.1|BJM02_15615|hypothetical protein	0	0	0	0	0	0	0	0	0	0	0	0	0	0	0	0	0	0	0	0	0	0	0	0	0	0	0	0	0	0	0	0	0	0	0	0
*|AJW50230.1|UB21_15710 |*|*|2,5-diketo-D-gluconic acid reductase	0	0	0	0	0	0	0	0	0	0	0	0	0	0	2	0	0	0	0	0	0	0	0	0	0	0	2	0	0	0	1	1	0	0	0	2
*|AJW50234.1|UB21_15730|ARN07371.1|BJM02_15675|50S ribosomal protein L28	0	0	0	0	0	0	0	0	0	0	0	2	0	0	0	0	0	0	0	0	0	0	0	0	0	0	0	0	0	0	0	0	0	0	0	0
*|AJW50255.1|UB21_15855|ARN07390.1|BJM02_15795|hypothetical protein	0	0	0	0	0	0	0	0	0	0	0	0	0	0	0	0	0	0	0	0	0	0	0	1	0	0	0	0	0	0	0	0	0	0	0	0
*|AJW50275.1|UB21_15975 |*|*|transposase	0	0	0	0	0	0	0	0	0	0	0	0	0	0	0	0	0	0	0	0	0	0	0	0	0	0	0	0	0	0	0	0	0	0	0	0
*|AJW50276.1|UB21_15980 |*|*|transposase	0	0	0	0	0	0	0	0	0	0	0	0	0	0	0	0	0	0	0	0	0	1	0	0	0	0	0	0	1	0	0	0	0	0	0	0
*|AJW50309.1|UB21_16205 |*|*|ATP-dependent DNA ligase	0	0	0	0	0	2	0	0	0	0	0	0	0	0	0	0	0	0	0	0	0	0	0	0	0	0	0	0	0	0	0	0	0	0	0	0
*|AJW50348.1|UB21_16445|ARN07491.1|BJM02_16415|hypothetical protein	0	0	0	0	0	0	0	0	0	0	0	0	0	0	0	0	0	0	0	0	0	0	0	0	0	0	0	0	0	0	0	0	0	0	0	0
*|AJW50351.1|UB21_16465 |*|*|molybdenum cofactor biosynthesis protein MoaC	0	0	0	0	0	0	0	0	0	0	0	0	0	0	0	0	0	0	0	0	0	0	0	0	0	0	0	0	0	0	0	0	0	0	0	0
*|AJW50356.1|UB21_16500 |*|*|hypothetical protein	0	0	0	0	0	0	1	0	0	0	0	0	0	0	0	0	0	0	0	0	0	0	0	0	0	0	2	0	0	0	0	0	0	0	0	0
*|AJW50365.1|UB21_16550|ARN07508.1|BJM02_16520|transposase	0	0	0	0	0	0	0	0	0	0	0	0	0	0	0	0	0	0	0	0	0	0	0	0	0	0	0	0	0	0	0	0	0	0	0	0
*|AJW50366.1|UB21_16555|ARN07509.1|BJM02_16525|hypothetical protein	0	0	0	0	0	0	0	0	0	0	0	0	0	0	0	0	0	0	0	0	0	0	0	0	0	0	0	0	0	0	0	0	0	0	0	0
*|AJW50367.1|UB21_16560 |*|*|transposase	0	0	0	0	0	0	0	0	0	0	0	0	0	0	0	0	0	0	0	0	1	0	0	0	0	0	0	0	0	0	0	0	0	0	0	0
*|AJW50368.1|UB21_16565 |*|*|transposase	0	0	0	0	0	0	0	0	0	1	0	0	0	0	0	0	0	0	0	0	0	0	0	0	0	0	0	0	0	0	0	0	0	0	0	0
*|AJW50369.1|UB21_16570|ARN07512.1|BJM02_16540|hypothetical protein	0	0	0	0	0	0	0	0	0	0	0	0	0	0	0	0	0	0	0	0	0	0	0	0	0	0	0	0	0	0	0	0	0	0	0	0
*|AJW50394.1|UB21_16730 |*|*|hypothetical protein	0	0	0	0	0	0	0	0	0	0	2	0	0	0	0	0	0	0	2	0	0	0	0	0	0	0	0	0	0	0	0	0	0	0	0	0
*|AJW50395.1|UB21_16735 |*|*|PPE family protein	0	0	0	0	0	0	0	0	0	0	0	0	0	0	0	0	0	0	0	0	1	0	0	0	0	0	0	0	0	0	0	0	0	0	0	0
*|AJW50404.1|UB21_16800|ARN07552.1|BJM02_16770|hypothetical protein	0	0	0	0	0	0	0	0	0	0	0	0	0	0	0	0	0	0	0	0	0	0	0	2	0	0	0	0	0	0	0	0	0	0	0	0
*|AJW50411.1|UB21_16835|ARN07559.1|BJM02_16805|hypothetical protein	0	0	0	0	0	0	0	0	0	0	0	0	0	0	0	0	0	0	0	0	0	0	0	0	0	0	0	0	0	0	0	0	0	0	0	0
*|AJW50413.1|UB21_16845 |*|*|transposase	0	0	0	0	0	0	0	0	0	0	0	0	0	0	0	0	0	0	0	0	0	0	0	0	0	0	0	1	1	0	0	0	0	0	0	0
*|AJW50414.1|UB21_16850 |*|*|transposase	0	0	0	0	0	0	0	0	0	0	0	0	0	0	0	0	0	0	0	0	0	0	0	0	0	0	0	0	0	0	0	0	0	0	0	0
*|AJW50423.1|UB21_16895|ARN07571.1|BJM02_16865|hypothetical protein	0	0	0	0	0	0	0	0	0	0	0	0	1	0	0	0	0	0	0	0	0	0	0	0	0	0	0	0	0	0	0	0	0	0	0	0
*|AJW50424.1|UB21_16905|ARN07572.1|BJM02_16875|hypothetical protein	0	0	0	0	0	0	0	0	1	0	0	0	0	0	0	0	0	0	0	0	0	0	0	0	0	0	0	0	0	0	0	0	0	0	0	0
*|AJW50480.1|UB21_17275 |*|*|phosphomannomutase	1	2	2	1	0	0	0	0	0	0	2	2	0	0	2	0	0	2	0	2	0	0	0	0	0	2	2	0	0	2	0	0	0	0	0	0
*|AJW50543.1|UB21_17620|ARN07690.1|BJM02_17590|pterin-4-alpha-carbinolamine dehydratase	0	0	0	0	0	0	0	0	0	0	0	0	0	0	0	0	0	0	0	0	0	0	0	0	0	0	0	0	0	0	0	0	0	0	0	0
*|AJW50544.1|UB21_17625|ARN07691.1|BJM02_17595|cyclic pyranopterin phosphate synthase MoaA	0	0	0	0	0	0	0	0	0	0	0	0	0	0	0	0	0	0	0	0	0	0	0	0	0	0	0	0	0	0	0	0	0	2	0	0
*|AJW50545.1|UB21_17630|ARN07692.1|BJM02_17600|hypothetical protein	0	0	0	0	0	0	0	0	0	0	0	0	0	0	0	0	0	0	0	0	0	0	0	0	0	0	0	0	0	0	0	0	0	0	0	0
*|AJW50546.1|UB21_17635|ARN07693.1|BJM02_17605|regulator	0	0	0	0	0	0	0	0	0	1	0	0	0	0	0	0	0	0	0	0	0	0	0	0	2	0	0	0	0	0	0	0	2	0	0	0
*|AJW50547.1|UB21_17640|ARN07694.1|BJM02_17610|hypothetical protein	0	0	0	0	0	0	0	0	0	0	0	0	0	0	0	0	0	0	0	0	0	0	0	0	0	0	0	0	0	0	0	1	0	0	0	0
*|AJW50548.1|UB21_17645 |*|*|transposase	0	0	0	0	0	0	0	0	0	0	0	0	0	0	0	0	0	0	0	0	0	0	0	0	0	0	0	1	0	0	0	0	0	0	0	0
*|AJW50549.1|UB21_17650 |*|*|transposase	0	0	0	0	0	0	0	0	0	0	0	0	0	0	0	0	0	0	0	0	0	0	0	0	0	0	0	0	0	0	0	0	0	0	0	0
*|AJW50564.1|UB21_17785|ARN07712.1|BJM02_17750|transposase	0	0	0	0	0	0	0	0	0	0	0	0	0	0	0	0	0	0	0	0	0	0	0	0	0	0	0	0	0	0	0	0	0	0	0	0
*|AJW50589.1|UB21_17950 |*|*|transposase	0	0	0	0	0	0	0	0	0	0	0	0	0	0	0	0	0	0	0	0	0	0	0	0	0	0	0	0	0	0	0	0	0	0	0	0
*|AJW50590.1|UB21_17955 |*|*|transposase	0	0	0	0	0	0	0	0	0	0	0	1	0	0	0	0	0	0	0	0	2	0	0	0	0	0	0	1	0	0	0	0	0	0	0	0
*|AJW50618.1|UB21_18135 |*|*|molecular chaperone GroEL	0	0	2	0	0	0	0	0	0	0	0	0	0	0	0	0	0	0	4	2	0	2	8	2	0	0	0	0	0	0	0	3	0	0	0	2
*|AJW50625.1|UB21_18190 |*|*|transposase	0	0	0	0	0	0	0	0	0	0	0	0	0	0	0	0	0	0	0	0	0	0	0	0	0	0	0	0	0	0	0	0	0	0	0	0
*|AJW50627.1|UB21_18200|ARN07779.1|BJM02_18170|integrase	0	0	0	0	0	0	0	0	0	0	0	0	0	0	0	0	0	0	0	0	0	0	0	0	0	0	0	0	0	0	0	1	0	0	0	0
*|AJW50628.1|UB21_18210|ARN07780.1|BJM02_18180|hypothetical protein	0	0	0	0	0	0	0	0	0	0	0	0	2	0	2	0	0	0	0	0	0	4	2	0	0	0	0	0	0	0	0	0	0	0	0	0
*|AJW50629.1|UB21_18215|ARN07781.1|BJM02_18185|hypothetical protein	0	0	0	0	0	0	0	0	0	0	0	0	0	0	2	0	0	2	0	0	0	0	0	0	0	0	0	0	0	0	0	0	0	0	0	0
*|AJW50654.1|UB21_18375 |*|*|50S ribosomal protein L36	1	0	0	0	0	1	0	0	0	0	0	0	0	0	2	1	0	0	1	0	0	0	0	0	0	0	0	0	1	0	0	0	0	0	2	0
*|AJW50682.1|UB21_18565 |*|*|3-ketoacyl-ACP reductase	0	0	0	0	0	0	0	0	0	0	0	0	2	0	0	0	0	0	0	0	0	0	0	0	0	0	0	0	0	0	2	0	0	0	0	0
*|AJW50686.1|UB21_18590 |*|*|hypothetical protein	0	0	0	0	0	0	0	0	0	0	0	0	0	0	0	0	0	0	0	0	0	0	0	0	0	0	0	0	0	0	0	0	0	0	0	0
*|AJW50687.1|UB21_18595 |*|*|hypothetical protein	0	0	0	0	0	0	0	0	0	0	0	0	0	0	0	0	0	0	0	0	0	0	0	0	0	0	0	0	0	0	0	0	0	0	0	0
*|AJW50688.1|UB21_18600 |*|*|hypothetical protein	0	1	0	0	2	1	1	2	0	1	0	1	1	0	3	1	3	5	3	2	4	7	1	0	7	5	2	6	0	4	1	2	1	0	1	0
*|AJW50689.1|UB21_18615 |*|*|hypothetical protein	0	1	1	0	0	0	0	0	0	0	0	1	0	0	0	0	0	0	0	0	0	0	0	0	0	1	0	0	0	0	0	0	0	0	1	0
*|AJW50693.1|UB21_18660 |*|*|hypothetical protein	0	0	0	0	0	0	0	0	0	0	0	0	0	0	0	0	0	0	0	0	0	0	0	0	0	0	0	0	0	0	0	0	0	0	0	0
*|AJW50694.1|UB21_18665 |*|*|hypothetical protein	0	0	0	0	0	0	0	0	0	0	0	0	0	0	0	0	0	0	0	0	0	0	0	0	0	0	0	0	0	0	0	0	0	0	0	0
*|AJW50703.1|UB21_18720 |*|*|membrane protein	2	2	4	0	0	0	0	0	0	0	0	2	0	0	2	2	0	0	0	0	3	0	0	0	0	0	2	4	0	0	0	0	2	0	0	0
*|AJW50786.1|UB21_19205 |*|*|type VII secretion protein EsxI	0	0	0	1	0	0	0	0	0	0	0	0	0	0	2	0	0	0	0	0	0	0	0	0	0	0	0	1	0	0	0	0	0	0	2	0
*|AJW50787.1|UB21_19210 |*|*|peptidase M22	0	1	0	0	0	0	1	0	0	0	0	1	0	0	0	0	0	0	0	0	0	2	0	0	0	0	0	0	1	0	0	0	0	0	0	2
*|AJW50821.1|UB21_19450 |*|*|hypothetical protein	0	0	0	0	0	0	0	0	0	0	0	0	0	0	0	0	0	0	0	0	0	0	0	0	0	0	0	0	0	2	0	0	0	0	0	0
*|AJW50881.1|UB21_19800 |*|*|ATP-dependent DNA ligase	0	0	0	0	0	0	0	0	0	0	0	0	0	0	0	0	0	0	0	0	0	0	0	0	0	0	0	0	0	0	0	0	0	0	0	0
*|AJW50929.1|UB21_20105|ARN08086.1|BJM02_20055|hypothetical protein	0	0	0	0	0	0	0	0	0	0	0	0	0	0	0	0	0	0	0	0	0	0	0	0	0	0	0	0	0	0	0	0	0	0	0	0
*|AJW50949.1|UB21_20245|ARN08107.1|BJM02_20195|twitching motility protein PilT	0	0	0	0	0	0	0	0	0	0	0	0	0	0	0	0	0	0	0	0	0	0	0	0	0	0	0	0	0	0	0	0	0	0	0	0
*|AJW50973.1|UB21_20410 |*|*|transposase	0	0	0	0	0	0	0	0	0	0	0	1	0	1	0	0	0	0	0	0	0	0	0	0	0	0	0	0	0	0	0	0	0	0	0	0
*|AJW50975.1|UB21_20420|ARN08135.1|BJM02_20370|transposase	0	0	0	0	0	0	0	0	0	0	0	0	0	0	0	0	0	0	0	0	1	0	0	0	0	0	0	0	0	0	0	0	0	0	0	0
*|AJW50986.1|UB21_20485 |*|*|glutamate synthase	0	0	0	0	0	0	0	0	0	0	0	0	0	0	0	0	0	0	0	0	0	0	0	0	0	0	0	0	2	0	0	4	0	0	0	0
*|AJW51016.1|UB21_20675|ARN08178.1|BJM02_20615|hypothetical protein	0	0	0	0	0	0	0	0	0	0	0	0	0	0	0	0	0	0	0	0	0	0	0	0	0	0	0	0	0	0	0	0	0	0	0	0
*|AJW51101.1|UB21_02700 |*|*|hypothetical protein	0	0	0	0	0	0	0	0	0	0	0	0	0	0	0	0	0	0	0	0	0	0	0	0	0	0	0	0	0	0	0	0	0	0	0	0
*|AJW51112.1|UB21_03250|ARN08279.1|BJM02_03225|hypothetical protein	0	0	0	0	0	0	0	0	0	0	0	0	0	0	0	0	0	0	0	0	0	0	0	0	0	0	0	0	0	0	0	0	0	0	0	0
*|AJW51121.1|UB21_03890|ARN08287.1|BJM02_03865|hypothetical protein	0	0	0	0	0	0	0	0	0	0	0	0	0	0	0	0	0	0	0	0	0	0	0	0	0	0	0	0	0	0	0	0	0	0	0	0
*|AJW51128.1|UB21_04310 |*|*|thiosulfate sulfurtransferase	0	0	0	0	0	0	0	0	0	0	0	1	0	0	1	0	1	0	0	1	2	0	0	0	0	0	0	0	0	0	0	0	1	0	0	0
*|AJW51133.1|UB21_04425|ARN08300.1|BJM02_04395|hypothetical protein	0	0	2	0	1	0	0	0	0	0	0	0	0	0	0	0	0	0	0	0	0	0	0	0	0	0	0	0	0	0	2	0	0	0	0	0
*|AJW51134.1|UB21_04450 |*|*|hypothetical protein	0	0	0	0	0	0	0	0	0	0	0	0	0	0	0	0	0	0	0	0	0	0	0	0	0	0	0	0	0	0	0	0	0	0	0	0
*|AJW51162.1|UB21_05410 |*|*|bifunctional N-acetylglucosamine-1-phosphate uridyltransferase/glucosamine-1-phosphate acetyltransferase	0	0	0	2	0	0	0	0	0	6	0	0	0	0	2	0	0	0	0	0	2	0	0	0	0	0	0	0	0	0	0	0	0	0	0	0
*|AJW51170.1|UB21_05705 |*|*|hypothetical protein	0	0	1	0	0	0	1	0	0	0	0	0	0	0	0	0	0	1	0	0	0	0	0	1	0	0	0	1	2	0	0	0	0	0	0	0
*|AJW51186.1|UB21_06285 |*|*|FO synthase	0	0	0	0	0	0	0	0	0	0	0	0	0	0	0	0	0	0	0	0	0	0	0	0	0	0	2	0	0	0	0	0	0	0	0	0
*|AJW51191.1|UB21_06410 |*|*|transposase	0	1	0	1	0	0	0	0	0	0	0	0	0	0	0	1	0	0	0	0	0	0	0	0	0	0	0	0	0	0	0	0	0	0	0	0
*|AJW51203.1|UB21_07000 |*|*|transposase	0	0	0	0	0	0	0	0	0	0	0	0	0	0	1	0	0	0	0	0	0	0	0	2	0	0	0	0	0	0	0	0	0	0	0	0
*|AJW51226.1|UB21_08285 |*|*|hypothetical protein	0	1	0	0	0	0	0	0	0	0	0	0	0	0	0	0	0	0	0	0	0	0	0	0	0	0	0	0	0	0	0	0	0	0	0	0
*|AJW51243.1|UB21_09145|ARN08417.1|BJM02_09100|cell wall anchor protein	0	0	0	0	0	0	0	0	0	0	0	0	0	0	0	0	0	0	0	0	0	0	0	0	0	0	0	0	0	0	0	0	0	0	0	0
*|AJW51245.1|UB21_09190|ARN08419.1|BJM02_09145|respiratory nitrate reductase subunit gamma	0	0	0	0	0	0	0	0	0	0	0	0	0	0	2	0	0	0	0	0	0	0	0	0	0	0	0	0	0	0	0	0	0	0	0	0
*|AJW51260.1|UB21_09965|ARN08430.1|BJM02_09910|hypothetical protein	0	1	0	0	0	0	2	0	0	0	0	1	0	0	0	0	0	0	0	0	0	0	0	0	0	0	0	0	0	0	0	0	0	0	0	0
*|AJW51271.1|UB21_10380|ARN08441.1|BJM02_10325|hypothetical protein	0	0	0	0	0	0	0	0	0	0	0	0	0	0	0	0	0	0	0	0	0	0	0	0	0	0	0	0	0	0	0	0	0	0	0	0
*|AJW51276.1|UB21_10640|ARN06524.1|BJM02_10580|hypothetical protein	0	0	0	0	0	0	0	0	0	0	0	0	0	0	0	0	0	0	1	2	0	1	2	0	0	2	0	0	0	0	0	0	0	0	0	0
*|AJW51280.1|UB21_10845|ARN08448.1|BJM02_10785|dolichol-phosphate mannosyltransferase	3	4	2	3	0	1	0	1	2	1	1	3	0	0	1	0	2	0	1	3	0	0	1	0	0	1	0	2	0	1	0	1	1	0	1	1
*|AJW51285.1|UB21_11080 |*|*|preprotein translocase subunit SecA	0	0	0	0	0	0	0	0	0	0	0	0	0	2	0	0	0	0	0	0	0	0	0	0	0	0	0	0	1	0	0	0	0	0	0	0
*|AJW51292.1|UB21_11415 |*|*|UDP-N-acetylmuramoyl-L-alanyl-D-glutamate synthetase	0	0	0	0	0	0	1	0	0	0	0	0	0	0	0	0	1	1	1	2	0	0	0	0	0	2	0	1	4	0	0	0	0	0	0	0
*|AJW51301.1|UB21_11585|ARN08466.1|BJM02_11530|hypothetical protein	0	0	0	0	0	0	0	0	0	0	0	0	0	0	0	0	0	0	0	0	0	0	0	0	0	0	0	0	0	0	0	0	0	0	0	0
*|AJW51339.1|UB21_12860 |*|*|transposase	0	0	0	0	0	0	0	0	0	0	0	0	0	0	0	0	0	0	0	0	0	0	0	0	0	0	0	0	0	0	0	0	0	0	0	0
*|AJW51368.1|UB21_14045|ARN07093.1|BJM02_13985|antitoxin MazE	0	0	0	0	0	0	0	0	0	0	0	0	0	0	0	0	0	0	0	0	0	0	0	0	0	0	0	0	0	0	0	0	0	0	0	0
*|AJW51388.1|UB21_14605 |*|*|FAD-dependent thymidylate synthase	0	0	0	0	0	0	0	0	0	0	0	0	0	0	0	0	0	0	0	0	0	0	0	0	0	1	0	0	0	0	0	0	0	0	0	0
*|AJW51392.1|UB21_14945 |*|*|hypothetical protein	0	0	0	0	0	0	0	0	0	0	1	0	0	0	0	0	0	0	0	0	0	0	0	0	0	0	0	0	2	0	0	0	0	0	0	0
*|AJW51404.1|UB21_15440|ARN08552.1|BJM02_15385|hypothetical protein	0	0	0	0	0	0	0	0	0	0	0	0	0	0	0	0	0	0	0	0	0	0	0	0	0	0	0	0	0	0	0	0	0	0	0	0
*|AJW51421.1|UB21_16000 |*|*|transposase	1	0	0	0	0	0	0	0	0	0	0	0	0	0	0	0	0	0	0	0	0	0	0	0	0	0	0	0	2	0	0	0	0	0	0	0
*|AJW51426.1|UB21_16110|ARN08578.1|BJM02_16075|hypothetical protein	0	0	0	0	0	0	0	0	0	0	0	0	0	0	0	0	0	0	0	0	0	0	0	0	0	0	0	0	0	0	0	0	0	0	0	0
*|AJW51436.1|UB21_16430 |*|*|peptide chain release factor 2	0	0	0	0	2	0	0	0	0	0	0	0	0	0	0	0	0	0	0	0	0	0	0	0	0	0	0	0	0	0	0	0	0	0	0	0
*|AJW51438.1|UB21_16485 |*|*|transposase	0	0	0	1	0	0	0	0	0	0	0	0	0	0	0	0	0	0	0	0	0	0	0	0	0	0	0	0	0	0	0	0	0	0	0	0
*|AJW51462.1|UB21_17615 |*|*|molybdenum cofactor biosynthesis protein MoaC	0	0	0	0	0	0	0	0	0	0	0	0	0	0	0	0	0	0	0	0	0	0	0	0	0	0	0	0	0	0	0	0	0	0	0	0
*|AJW51463.1|UB21_17655 |*|*|transposase	0	0	0	0	0	0	0	0	0	0	0	0	0	0	0	0	0	0	0	0	0	0	0	0	0	0	0	0	0	0	0	0	0	0	0	0
*|AJW51467.1|UB21_17755 |*|*|hypothetical protein	1	0	0	0	0	0	0	0	0	0	0	0	1	1	0	0	0	1	0	0	0	0	0	0	1	0	0	0	0	0	0	0	0	0	0	0
*|AJW51480.1|UB21_18205|ARN08630.1|BJM02_18175|PE family protein	0	0	0	0	0	0	0	0	0	0	0	0	0	0	0	0	0	0	0	0	0	0	0	0	0	0	0	0	0	0	0	0	0	0	0	0
*|AJW51497.1|UB21_18770 |*|*|hypothetical protein	2	0	0	0	0	0	0	0	0	0	0	0	0	0	0	0	0	0	0	0	2	0	0	0	0	0	0	0	0	0	0	0	0	0	0	0
*|AJW51504.1|UB21_19165 |*|*|hypothetical protein	0	0	0	0	0	0	0	0	0	0	0	0	0	0	0	0	0	0	0	0	0	0	0	0	0	0	0	0	0	0	0	0	0	0	0	0
*|AJW51518.1|UB21_19610 |*|*|glycerol kinase	0	0	0	0	0	0	0	0	2	0	2	0	0	0	0	0	0	0	0	0	0	0	0	0	2	0	0	0	0	0	0	0	0	1	2	0
*|AJW51534.1|UB21_20315|ARN08683.1|BJM02_20265|acyl-CoA synthetase	0	0	0	0	0	0	0	0	0	0	0	0	0	0	0	0	0	0	0	0	0	0	0	0	0	0	0	0	0	0	0	0	0	0	0	0
*|AJW51542.1|UB21_20575 |*|*|hypothetical protein	0	0	0	0	1	0	3	0	0	0	0	1	0	0	0	0	1	2	1	2	0	0	0	1	0	1	4	0	0	0	2	0	0	0	1	0
Rv0001|AJW47721.1|UB21_00005|ARN04745.1|BJM02_00005|Chromosomal replication initiator protein DnaA	0	0	0	0	0	0	0	0	0	1	0	0	0	2	2	0	2	0	0	0	1	0	0	0	0	0	0	0	0	0	0	3	0	0	0	0
Rv0002|AJW47724.1|UB21_00020|ARN04748.1|BJM02_00020|Beta sliding clamp (Beta clamp) (Sliding clamp) (Beta-clamp processivity factor) (DNA polymerase III beta sliding clamp subunit) (DNA polymerase III subunit beta) (Mtb beta-clamp)	0	2	0	0	0	0	0	0	0	0	0	0	0	0	0	2	0	0	0	0	0	0	0	0	0	2	0	2	0	0	0	0	2	0	0	0
Rv0003|AJW47725.1|UB21_00025|ARN04749.1|BJM02_00025|DNA replication and repair protein RecF	0	0	0	0	0	0	0	0	0	0	0	0	0	0	0	0	0	0	0	0	0	0	0	0	0	0	0	0	0	2	0	0	0	0	0	0
Rv0004|AJW47726.1|UB21_00030|ARN04750.1|BJM02_00030|UPF0232 protein Rv0004	0	0	0	0	0	0	0	0	0	0	0	0	1	0	0	0	1	0	2	0	1	2	1	0	0	1	0	1	2	2	1	3	0	0	1	0
Rv0005|AJW51040.1|UB21_00035|ARN08204.1|BJM02_00035|DNA gyrase subunit B (EC 5.6.2.2)	0	0	0	0	1	0	0	0	0	0	2	5	0	0	0	0	2	0	0	0	0	2	0	0	0	0	1	0	0	2	0	0	0	0	0	0
Rv0006|AJW47727.1|UB21_00040|ARN04751.1|BJM02_00040|DNA gyrase subunit A (EC 5.6.2.2) (Type IIA topoisomerase subunit GyrA)	2	0	3	0	1	0	0	2	0	0	0	0	2	0	1	2	2	0	0	0	2	2	0	0	0	0	0	0	2	0	0	0	0	0	0	0
Rv0007|AJW47728.1|UB21_00045|ARN04752.1|BJM02_00045|Uncharacterized protein Rv0007	0	0	0	0	0	0	0	0	0	0	0	0	0	0	3	0	0	0	0	0	0	0	0	0	2	0	0	0	0	0	2	0	0	0	0	0
Rv0008c|AJW47730.1|UB21_00065|ARN04754.1|BJM02_00065|Cell wall synthesis protein CwsA (Cell wall synthesis and cell shape protein A)	0	0	0	0	0	0	0	0	0	0	0	0	0	0	0	0	0	0	0	0	0	0	0	2	0	0	0	0	0	0	0	0	0	0	0	0
Rv0009|AJW47731.1|UB21_00070|ARN04755.1|BJM02_00070|Peptidyl-prolyl cis-trans isomerase A (PPIase A) (EC 5.2.1.8) (Cyclophilin) (Rotamase A)	0	0	1	0	0	0	0	0	0	2	1	0	0	0	0	3	0	0	0	0	0	0	2	0	0	2	0	0	0	0	0	0	0	0	0	0
Rv0010c|AJW47732.1|UB21_00075|ARN04756.1|BJM02_00075|Uncharacterized protein Rv0010c	0	0	0	0	0	0	0	0	0	0	0	0	0	0	0	1	0	0	1	0	0	0	0	0	0	0	0	0	0	0	0	0	0	0	0	0
Rv0011c|AJW51041.1|UB21_00080|ARN08205.1|BJM02_00080|Cell division protein CrgA	0	0	0	0	0	0	0	0	0	0	0	0	1	0	0	0	0	0	0	0	0	2	2	0	0	0	0	0	0	0	0	0	0	0	0	0
Rv0012|AJW47733.1|UB21_00085|ARN04757.1|BJM02_00085|Probable conserved membrane protein	0	0	0	0	2	0	0	0	0	0	0	0	0	0	0	0	0	0	0	0	0	0	0	0	0	2	0	0	0	0	0	0	0	0	0	0
Rv0013|AJW47734.1|UB21_00090|ARN04758.1|BJM02_00090|Anthranilate synthase component 2 (AS) (ASII) (EC 4.1.3.27) (Anthranilate synthase, GATase component) (Anthranilate synthase, glutamine amidotransferase component)	0	0	0	0	0	0	0	0	0	0	0	0	0	0	0	0	0	0	0	0	0	0	0	0	2	0	0	2	0	0	0	0	0	0	0	0
Rv0014c|AJW47735.1|UB21_00095|ARN04759.1|BJM02_00095|Serine/threonine-protein kinase PknB (EC 2.7.11.1)	0	0	0	0	0	0	0	0	0	0	0	0	0	0	0	0	1	0	0	0	0	0	0	0	1	0	1	0	0	2	0	0	2	0	0	2
Rv0016c|AJW47736.1|UB21_00105|ARN04761.1|BJM02_00105|Penicillin-binding protein A (PBPA)	0	0	0	2	0	0	0	0	0	0	0	2	0	0	0	0	0	0	0	0	0	1	0	0	0	0	0	2	0	0	2	0	0	1	1	0
Rv0018c|AJW47737.1|UB21_00115|ARN04763.1|BJM02_00115|Serine/threonine protein phosphatase PstP (EC 3.1.3.16) (Mycobacterial Ser/Thr phosphatase) (Mstp) (PP2C-family Ser/Thr phosphatase)	0	2	1	0	0	0	0	0	0	0	0	0	0	0	0	0	0	1	0	0	0	0	0	0	0	2	0	1	0	0	0	0	0	0	0	0
Rv0019c|AJW47738.1|UB21_00120|ARN04764.1|BJM02_00120|FHA domain-containing protein FhaB (FtsZ-interacting protein A)	0	0	0	0	0	0	0	0	0	0	0	0	0	0	0	0	0	0	0	0	0	0	0	0	1	0	0	1	0	0	0	0	0	0	0	0
Rv0020c|AJW47739.1|UB21_00125|ARN04765.1|BJM02_00125|FHA domain-containing protein FhaA	0	0	0	0	0	0	0	0	0	0	0	0	0	0	0	2	0	0	0	0	0	2	0	0	0	2	0	1	0	0	0	0	0	0	0	0
Rv0022c|AJW47740.1|UB21_00140|ARN04767.1|BJM02_00140|Transcriptional regulator WhiB5	0	0	0	0	0	0	0	0	0	0	0	0	0	0	0	0	0	0	0	0	0	0	0	0	0	0	0	0	0	0	0	0	0	0	0	0
Rv0023|AJW47741.1|UB21_00145|ARN04768.1|BJM02_00145|Uncharacterized HTH-type transcriptional regulator Rv0023	0	0	0	0	0	0	0	0	0	0	0	0	0	0	0	0	0	0	0	0	0	0	0	0	0	0	0	0	0	0	0	0	0	0	0	0
Rv0024|AJW47742.1|UB21_00150|ARN04769.1|BJM02_00150|Putative secreted protein P60-related protein	0	0	0	0	0	0	0	0	0	0	0	0	0	0	0	0	0	0	0	0	0	0	0	0	0	0	0	0	0	0	0	0	0	0	0	0
Rv0025|AJW47743.1|UB21_00155|ARN04770.1|BJM02_00155|Uncharacterized protein Rv0025	0	0	2	0	0	0	0	0	0	0	0	0	0	0	0	0	0	0	0	0	0	0	0	0	0	0	0	0	0	0	0	2	0	0	0	0
Rv0026|AJW47744.1|UB21_00160|ARN04771.1|BJM02_00160|Uncharacterized protein Rv0026	0	1	0	0	0	0	0	0	0	0	0	0	0	0	0	0	0	0	0	0	0	2	2	0	0	0	0	0	0	0	0	0	0	0	0	0
Rv0027|AJW47745.1|UB21_00165|ARN04772.1|BJM02_00165|Uncharacterized protein Rv0027	0	0	0	0	0	0	0	0	0	0	0	0	0	0	0	0	0	0	0	0	0	0	0	0	0	0	0	0	0	0	0	0	0	0	0	0
Rv0028|AJW47746.1|UB21_00170|ARN04773.1|BJM02_00170|Uncharacterized protein Rv0028	0	0	0	0	0	0	0	0	0	0	0	0	0	0	0	0	0	0	0	0	0	0	0	0	0	0	0	0	0	0	0	0	0	0	0	0
Rv0029|AJW47747.1|UB21_00175|ARN04774.1|BJM02_00175|Uncharacterized protein	0	0	0	0	0	0	0	0	0	0	0	0	0	0	0	0	0	0	0	0	0	0	0	0	0	0	0	0	0	0	0	0	0	0	0	0
Rv0030|AJW47748.1|UB21_00180|ARN04775.1|BJM02_00180|Uncharacterized protein Rv0030	0	0	0	0	0	0	0	0	0	0	0	0	0	0	0	0	0	0	0	0	0	0	0	0	0	0	0	0	0	0	2	0	0	0	0	0
Rv0031|AJW47749.1|UB21_00185|ARN04776.1|BJM02_00185|Possible remnant of a transposase	0	0	0	0	0	0	0	0	0	0	0	0	0	0	2	0	0	0	0	0	0	0	0	0	0	0	0	0	0	0	0	0	0	0	0	0
Rv0032|AJW47750.1|UB21_00190|ARN04777.1|BJM02_00190|Putative 8-amino-7-oxononanoate synthase 2 (AONS) (EC 2.3.1.47) (7-keto-8-amino-pelargonic acid synthase) (7-KAP synthase) (KAPA synthase) (8-amino-7-ketopelargonate synthase)	0	0	0	0	0	0	0	0	0	0	0	0	0	0	0	0	0	0	0	0	0	0	0	0	0	0	0	0	0	2	0	0	0	0	0	0
Rv0033|AJW47751.1|UB21_00195|ARN04778.1|BJM02_00195|Probable acyl carrier protein AcpA (ACP)	0	0	0	0	0	0	0	0	0	0	0	0	0	0	0	0	0	0	0	0	0	0	0	0	0	0	0	0	0	0	0	0	0	0	0	0
Rv0034|AJW47752.1|UB21_00200|ARN04779.1|BJM02_00200|Uncharacterized protein Rv0034	0	0	0	0	0	0	0	0	0	0	0	0	0	0	0	0	0	0	0	0	0	0	0	0	0	0	0	0	0	0	0	0	0	0	0	0
Rv0035|AJW47753.1|UB21_00205|ARN04780.1|BJM02_00205|Probable fatty-acid-CoA ligase FadD34 (Fatty-acid-CoA synthetase) (Fatty-acid-CoA synthase)	0	0	0	0	0	0	0	0	0	0	0	0	0	0	0	0	0	0	0	0	0	0	0	0	0	0	0	0	0	0	0	0	0	0	1	0
Rv0036c|AJW51042.1|UB21_00210|ARN08206.1|BJM02_00210|Uncharacterized protein Rv0036c	0	0	0	0	0	0	0	0	2	0	0	2	2	0	2	0	0	0	0	0	0	0	0	0	0	0	0	0	0	0	0	0	0	0	0	0
Rv0037c|AJW47754.1|UB21_00215|ARN04781.1|BJM02_00215|Uncharacterized MFS-type transporter Rv0037c	0	0	0	0	0	0	0	0	0	0	0	0	0	0	0	0	0	0	0	0	0	0	0	0	1	0	0	0	0	0	0	0	0	0	0	0
Rv0038|AJW51043.1|UB21_00220|ARN08207.1|BJM02_00220|UPF0301 protein Rv0038	0	0	0	0	0	0	0	0	2	0	0	0	0	0	0	0	0	0	0	0	0	0	0	0	0	0	0	0	0	0	0	0	0	2	0	2
Rv0039c|AJW47755.1|UB21_00225|ARN04782.1|BJM02_00225|Uncharacterized protein Rv0039c	0	0	0	0	0	0	0	0	0	0	0	0	0	0	0	0	0	0	0	0	0	0	0	0	0	0	0	0	0	0	0	0	0	0	0	0
Rv0040c|AJW47756.1|UB21_00230|ARN04783.1|BJM02_00230|Proline-rich 28 kDa antigen	0	3	0	0	0	0	0	0	0	0	0	0	0	0	0	0	0	0	0	0	0	0	0	0	0	0	0	0	0	0	0	2	0	0	0	0
Rv0041|AJW47757.1|UB21_00235|ARN04784.1|BJM02_00235|Leucine--tRNA ligase (EC 6.1.1.4) (Leucyl-tRNA synthetase) (LeuRS)	0	0	3	2	0	0	0	0	0	0	2	0	0	2	0	0	0	0	0	0	0	0	0	0	0	0	0	0	0	0	0	0	0	0	0	0
Rv0042c|AJW51044.1|UB21_00240|ARN08208.1|BJM02_00240|Possible transcriptional regulatory protein (Probably MarR-family)	0	0	0	0	0	0	0	0	0	0	0	0	0	0	0	0	0	0	0	0	0	0	0	0	0	0	0	0	0	0	0	0	0	0	0	0
Rv0043c|AJW47758.1|UB21_00245|ARN04785.1|BJM02_00245|Uncharacterized HTH-type transcriptional regulator Rv0043c	1	0	0	0	0	0	0	0	0	0	0	0	0	0	0	0	2	0	0	0	0	0	0	0	0	0	0	0	0	0	0	0	0	0	0	0
Rv0044c|AJW47759.1|UB21_00250|ARN04786.1|BJM02_00250|Possible oxidoreductase	0	0	0	0	0	0	0	0	0	0	0	0	0	0	0	0	0	0	0	2	0	0	0	0	0	0	0	0	1	0	0	0	2	0	0	0
Rv0046c|AJW47760.1|UB21_00260|ARN04787.1|BJM02_00260|Inositol-3-phosphate synthase (IPS) (EC 5.5.1.4) (Myo-inositol 1-phosphate synthase) (MI-1-P synthase) (MIP synthase)	4	0	0	0	0	0	0	0	0	0	0	2	0	3	2	0	2	2	0	0	2	2	0	0	0	2	2	0	2	0	2	0	2	0	0	0
Rv0047c|AJW47761.1|UB21_00265|ARN04788.1|BJM02_00265|Conserved protein	0	0	0	0	2	0	0	0	0	0	0	0	0	0	0	0	0	0	0	0	0	0	0	0	0	0	0	0	0	0	0	0	0	2	0	0
Rv0048c|AJW47762.1|UB21_00270|ARN04789.1|BJM02_00270|Uncharacterized protein Rv0048c	0	0	0	0	0	0	0	0	0	0	0	0	0	0	0	0	0	0	0	0	0	0	0	0	0	0	0	0	0	0	0	0	0	0	0	0
Rv0049|AJW51045.1|UB21_00275|ARN08209.1|BJM02_00275|Uncharacterized protein Rv0049	0	0	0	0	0	0	0	0	0	0	0	0	0	2	0	0	0	0	0	0	2	2	0	0	0	0	0	0	0	0	0	0	0	0	0	0
Rv0052|AJW47763.1|UB21_00290|ARN04792.1|BJM02_00290|Conserved protein	0	0	0	0	0	0	0	0	0	0	0	0	0	0	0	0	0	0	0	0	0	0	0	0	0	0	0	0	0	0	0	0	0	0	0	0
Rv0053|AJW47764.1|UB21_00295|ARN04793.1|BJM02_00295|30S ribosomal protein S6	0	0	0	0	0	0	0	0	1	0	0	0	0	0	0	0	0	0	0	0	0	2	2	0	0	0	0	0	0	0	0	0	0	0	0	0
Rv0054|AJW47765.1|UB21_00300|ARN04794.1|BJM02_00300|Single-stranded DNA-binding protein (SSB)	0	0	0	0	0	0	0	0	2	0	0	0	0	0	0	0	0	0	0	0	0	0	0	0	0	0	0	0	0	0	0	0	0	0	0	0
Rv0055|AJW47766.1|UB21_00305|ARN04795.1|BJM02_00305|30S ribosomal protein S18 1	0	0	0	0	0	0	0	0	0	0	0	0	2	4	0	0	0	0	0	0	0	0	0	2	0	0	0	0	0	0	0	0	0	0	0	0
Rv0056|AJW47767.1|UB21_00310|ARN04796.1|BJM02_00310|50S ribosomal protein L9	0	0	0	0	0	0	0	0	0	0	0	0	0	0	0	0	0	0	0	0	0	0	0	0	0	0	2	0	0	0	0	2	0	0	0	0
Rv0057|AJW51046.1|UB21_00315|ARN08210.1|BJM02_00315|Uncharacterized protein Rv0057	0	0	0	0	0	0	0	0	0	0	0	0	0	0	0	0	0	0	0	0	0	0	0	0	0	0	0	0	0	0	0	0	0	0	0	0
Rv0058|AJW47768.1|UB21_00320|ARN04797.1|BJM02_00320|Replicative DNA helicase (EC 3.6.4.12) [Cleaved into: Endonuclease PI-MtuHIP (EC 3.1.-.-) (Mtu dnaB intein)]	0	1	1	0	0	0	0	0	2	0	0	0	2	0	0	0	0	2	0	0	0	0	0	2	0	0	1	2	2	0	0	0	0	0	0	0
Rv0059|AJW47769.1|UB21_00325|ARN04798.1|BJM02_00325|DarT domain-containing protein	0	0	0	0	0	0	0	0	0	0	0	0	0	0	0	0	0	0	0	0	0	0	0	0	0	0	0	0	0	0	0	0	0	0	0	0
Rv0060|AJW47770.1|UB21_00330|ARN04799.1|BJM02_00330|Macro domain-containing protein	0	0	0	0	0	0	0	0	0	0	0	0	0	0	0	0	0	0	0	0	0	0	2	0	0	0	0	2	0	0	2	0	0	0	0	0
Rv0062|AJW47773.1|UB21_00345|ARN04802.1|BJM02_00345|Glucanase (EC 3.2.1.-)	0	0	0	2	0	0	0	0	0	0	0	0	2	0	0	0	0	0	0	0	2	0	0	0	0	0	0	0	0	0	0	0	1	0	0	0
Rv0063|AJW47774.1|UB21_00350|ARN04803.1|BJM02_00350|Possible oxidoreductase	0	0	0	0	0	0	0	0	0	0	0	0	0	0	0	0	0	0	0	0	0	0	0	0	0	0	0	0	0	0	0	0	0	0	0	0
Rv0064|AJW47775.1|UB21_00355|ARN04804.1|BJM02_00355|UPF0182 protein Rv0064	0	0	1	0	0	0	0	0	0	0	0	0	0	0	0	0	0	0	0	0	1	0	0	0	0	0	1	0	0	2	0	0	0	0	0	0
Rv0064A|AJW47776.1|UB21_00360|ARN04805.1|BJM02_00360|Putative antitoxin VapB1	0	0	0	0	0	0	0	0	0	0	0	0	0	0	0	0	0	0	0	0	0	0	0	0	0	0	0	0	0	0	0	0	1	0	0	1
Rv0065|AJW47777.1|UB21_00365|ARN04806.1|BJM02_00365|Ribonuclease VapC1 (RNase VapC1) (EC 3.1.-.-) (Toxin VapC1)	0	0	0	0	0	0	0	0	0	0	0	0	0	0	0	0	0	0	0	0	0	0	0	0	0	0	0	0	0	0	0	0	1	0	0	1
Rv0066c|AJW47778.1|UB21_00370|ARN04807.1|BJM02_00370|Isocitrate dehydrogenase [NADP] (EC 1.1.1.42) (Oxalosuccinate decarboxylase)	0	0	0	0	0	0	0	0	0	3	0	0	0	0	0	0	0	0	0	0	0	2	0	0	0	0	0	0	0	0	0	2	0	0	0	0
Rv0067c|AJW47779.1|UB21_00375|ARN04808.1|BJM02_00375|Possible transcriptional regulatory protein (Possibly TetR-family)	0	0	0	0	0	0	0	0	0	0	0	0	0	0	0	0	0	0	0	0	0	0	0	0	0	0	0	0	0	0	0	0	0	0	0	0
Rv0068|AJW47780.1|UB21_00380|ARN04809.1|BJM02_00380|Probable oxidoreductase	0	0	0	0	0	0	0	0	0	0	0	0	0	0	0	0	0	0	0	1	0	0	0	0	0	0	0	0	0	0	0	0	0	0	0	0
Rv0069c|AJW47781.1|UB21_00385|ARN04810.1|BJM02_00385|L-serine dehydratase (SDH) (EC 4.3.1.17) (L-serine deaminase) (L-SD)	0	0	0	0	0	0	0	0	0	0	0	0	2	0	2	0	1	0	0	0	0	0	0	0	0	0	0	0	2	0	0	0	0	0	0	0
Rv0070c|AJW47782.1|UB21_00390|ARN04811.1|BJM02_00390|Serine hydroxymethyltransferase 2 (SHM2) (SHMT 2) (Serine methylase 2) (EC 2.1.2.1)	0	0	0	0	0	0	0	2	0	0	0	0	0	0	0	0	0	0	0	0	0	0	2	0	0	0	0	0	0	0	0	0	0	0	0	0
Rv0074|AJW47783.1|UB21_00395|ARN04812.1|BJM02_00395|Conserved protein	0	0	0	0	0	0	0	0	0	0	0	0	0	0	0	0	0	0	0	0	2	0	0	0	0	0	0	0	0	0	0	0	0	0	0	0
Rv0075|AJW47784.1|UB21_00400|ARN04813.1|BJM02_00400|Probable aminotransferase	0	0	0	0	0	0	0	0	0	0	0	1	0	0	0	0	0	0	0	0	0	0	0	0	0	0	0	0	0	0	0	2	0	0	0	0
Rv0076c|AJW47785.1|UB21_00405|ARN04814.1|BJM02_00405|Probable membrane protein	0	0	0	0	0	0	0	0	0	0	0	0	0	0	0	0	0	0	0	0	0	0	0	0	0	0	0	0	0	0	0	0	0	0	2	0
Rv0077c|AJW51047.1|UB21_00410|ARN08211.1|BJM02_00410|Probable oxidoreductase	0	0	0	0	0	0	0	0	0	0	0	0	0	1	0	0	0	0	0	0	0	0	0	0	0	0	0	0	0	0	0	0	0	0	0	0
Rv0078|AJW47786.1|UB21_00415|ARN04815.1|BJM02_00415|Probable transcriptional regulatory protein	0	0	0	0	0	0	0	0	0	0	0	0	0	0	0	0	0	0	0	0	0	0	0	0	0	0	0	0	0	0	0	0	0	0	0	0
Rv0078A|AJW47787.1|UB21_00420|ARN04816.1|BJM02_00420|Uncharacterized protein	0	0	0	0	0	0	0	0	0	0	0	0	0	0	0	0	0	0	0	0	0	0	0	2	2	0	0	0	0	0	0	0	2	2	0	0
Rv0078B|AJW47788.1|UB21_00425|ARN04817.1|BJM02_00425|Conserved protein	0	0	0	0	0	0	0	0	0	0	0	0	0	0	0	0	0	0	0	0	0	2	0	0	0	0	0	0	0	0	0	0	0	2	0	0
Rv0079|AJW51048.1|UB21_00430|ARN08212.1|BJM02_00430|Dormancy associated translation inhibitor (DATIN)	0	0	0	0	0	0	0	0	2	0	0	0	0	4	2	0	0	1	0	0	0	0	1	2	4	2	0	4	3	2	1	2	2	0	0	2
Rv0080|AJW47789.1|UB21_00435|ARN04818.1|BJM02_00435|Uncharacterized protein Rv0080	0	0	0	0	0	0	0	0	0	0	0	0	0	2	0	0	0	0	0	0	0	0	2	0	0	0	0	0	0	0	0	0	0	0	1	0
Rv0081|AJW51049.1|UB21_00440|ARN08213.1|BJM02_00440|Uncharacterized HTH-type transcriptional regulator Rv0081	0	0	0	0	0	0	0	0	0	0	0	0	0	0	0	0	0	0	0	0	0	0	0	0	0	0	0	0	0	0	0	0	0	0	1	0
Rv0082|AJW47790.1|UB21_00445|*|*|Probable oxidoreductase	0	0	0	0	0	0	0	0	0	0	0	0	1	0	0	0	0	0	0	0	0	0	0	0	0	0	0	0	0	0	0	0	0	0	0	0
Rv0084|AJW51050.1|UB21_00455|ARN08214.1|BJM02_00455|Possible formate hydrogenlyase HycD (FHL)	0	0	0	0	0	0	0	0	0	0	0	0	0	0	0	0	0	0	0	0	0	0	0	0	0	0	0	0	0	2	0	0	0	0	0	0
Rv0085|AJW47791.1|UB21_00460|ARN04820.1|BJM02_00460|Uncharacterized protein Rv0085	0	0	0	0	0	0	0	0	0	0	0	0	0	0	0	0	0	0	0	0	0	0	0	0	0	0	0	2	0	0	0	0	0	0	0	0
Rv0086|AJW47792.1|UB21_00465|ARN04821.1|BJM02_00465|Possible hydrogenase HycQ	0	0	0	0	0	0	0	0	0	0	0	0	2	0	0	0	1	0	1	1	0	0	0	0	2	3	0	0	0	0	0	0	0	0	0	0
Rv0087|AJW47793.1|UB21_00470|ARN04822.1|BJM02_00470|Possible formate hydrogenase HycE (FHL)	0	0	0	0	0	0	0	0	0	0	2	0	0	0	0	0	0	0	0	0	0	0	0	0	0	0	0	0	0	0	0	0	0	0	0	0
Rv0088|AJW51051.1|UB21_00475|ARN08215.1|BJM02_00475|Uncharacterized protein Rv0088	0	0	0	0	0	0	0	0	0	2	0	0	0	0	0	0	0	0	0	0	2	0	0	0	0	0	0	0	0	0	0	2	0	0	0	2
Rv0089|AJW47794.1|UB21_00480|ARN04823.1|BJM02_00480|Uncharacterized methyltransferase Rv0089 (EC 2.1.1.-)	0	0	0	0	0	0	0	0	0	0	0	0	0	0	0	0	0	0	0	0	0	0	0	0	0	0	0	0	0	0	0	0	0	0	0	0
Rv0090|AJW47795.1|UB21_00485|ARN04824.1|BJM02_00485|Uncharacterized protein Rv0090	0	0	0	0	0	0	0	0	0	0	0	0	0	0	0	0	0	0	0	0	0	0	0	0	0	0	0	0	0	0	0	0	0	0	1	1
Rv0091|AJW51052.1|UB21_00490|ARN08216.1|BJM02_00490|5'-methylthioadenosine/S-adenosylhomocysteine nucleosidase (MTA/SAH nucleosidase) (MTAN) (EC 3.2.2.9) (5'-deoxyadenosine nucleosidase) (DOA nucleosidase) (dAdo nucleosidase) (5'-methylthioadenosine nucleosidase) (MTA nucleosidase) (S-adenosylhomocysteine nucleosidase) (AdoHcy nucleosidase) (SAH nucleosidase) (SRH nucleosidase)	0	0	0	1	0	0	0	0	0	0	0	0	0	0	0	0	0	0	1	0	4	2	0	2	0	0	0	0	5	2	5	2	1	1	2	0
Rv0092|AJW47796.1|UB21_00495|ARN04825.1|BJM02_00495|Copper-exporting P-type ATPase (EC 7.2.2.8) (Copper-exporting P-type ATPase A)	1	0	0	1	0	0	0	0	0	0	0	0	0	0	0	0	0	0	0	0	0	0	0	2	0	0	0	0	0	0	0	0	0	0	0	0
Rv0093c|AJW47797.1|UB21_00500|ARN04826.1|BJM02_00500|Uncharacterized protein Rv0093c	0	0	0	0	0	0	0	0	0	0	0	0	0	0	0	0	0	0	0	0	0	0	0	0	0	0	0	0	0	0	0	0	0	0	0	0
Rv0094c|AJW51487.1|UB21_18400|ARN08635.1|BJM02_18370|HNHc domain-containing protein	0	0	0	0	0	0	0	0	0	0	0	0	0	0	0	0	0	0	0	0	0	0	0	0	0	0	0	0	0	0	0	0	0	0	0	0
Rv0096|AJW47798.1|UB21_00515|ARN04827.1|BJM02_00515|Uncharacterized PPE family protein PPE1	0	0	0	0	0	0	0	0	0	0	0	0	0	0	0	0	0	0	0	0	0	2	0	0	1	0	0	0	0	2	0	0	0	0	0	0
Rv0097|AJW47799.1|UB21_00520|ARN04828.1|BJM02_00520|Putative dioxygenase Rv0097 (EC 1.-.-.-)	0	0	0	0	0	0	0	0	0	0	0	0	0	0	0	0	0	0	0	0	2	0	2	0	0	0	0	0	0	0	0	0	0	0	0	0
Rv0098|AJW47800.1|UB21_00525|ARN04829.1|BJM02_00525|Long-chain fatty acyl-CoA thioesterase FcoT (EC 3.1.2.-) (Palmitoyl-CoA hydrolase) (EC 3.1.2.2)	0	0	0	0	0	0	0	0	0	0	0	0	0	1	0	0	2	0	0	0	0	0	0	0	0	0	0	0	0	0	0	0	0	0	0	0
Rv0099|AJW47801.1|UB21_00530|ARN04830.1|BJM02_00530|Putative fatty-acid--CoA ligase FadD10 (Fatty-acid-CoA synthetase) (Fatty-acid-CoA synthase)) (EC 6.2.1.-)	0	0	0	0	0	1	0	0	0	0	0	0	0	1	0	0	0	2	0	0	0	0	0	0	0	0	0	0	0	0	0	0	0	0	0	0
Rv0100|AJW47802.1|UB21_00535|ARN04831.1|BJM02_00535|Uncharacterized protein Rv0100	0	0	0	0	0	0	0	0	0	0	0	0	0	0	0	0	0	0	0	0	0	0	0	0	0	0	0	0	0	0	0	0	0	0	0	0
Rv0101|AJW47803.1|UB21_00540|ARN04832.1|BJM02_00540|Mycobactin synthetase protein B (Phenyloxazoline synthase MbtB)	0	0	0	0	0	0	0	0	1	0	0	0	0	0	2	0	0	0	0	0	0	0	0	0	0	2	2	0	1	0	0	0	0	0	0	0
Rv0102|AJW47804.1|UB21_00545|ARN04833.1|BJM02_00545|Uncharacterized protein Rv0102	0	1	0	0	0	1	0	0	0	0	0	0	0	0	0	0	1	0	0	1	1	2	0	0	0	0	1	1	0	1	2	0	0	1	1	0
Rv0103c|AJW47805.1|UB21_00550|ARN04834.1|BJM02_00550|Cation-transporting P-type ATPase B (EC 7.2.2.-)	0	0	0	0	0	0	0	0	0	0	0	0	0	0	0	0	0	2	0	0	2	0	0	2	0	0	2	0	0	0	0	0	0	0	0	0
Rv0104|AJW47806.1|UB21_00555|ARN04835.1|BJM02_00555|Uncharacterized protein Rv0104	0	0	0	0	0	0	0	0	0	0	0	0	0	0	0	0	0	0	0	0	0	0	0	0	0	0	0	0	0	0	0	0	0	0	0	0
Rv0105c|AJW47808.1|UB21_00565|ARN04837.1|BJM02_00565|50S ribosomal protein L28-1	0	0	0	0	0	0	0	0	0	0	0	0	0	0	0	0	0	0	0	0	0	0	0	0	0	0	0	0	0	0	0	0	0	0	0	0
Rv0106|AJW47809.1|UB21_00570|ARN04838.1|BJM02_00570|Uncharacterized protein Rv0106	0	0	0	0	0	0	0	0	2	0	0	0	0	0	0	0	0	0	0	0	0	0	0	0	0	0	0	0	2	2	0	0	0	4	0	0
Rv0107c|AJW47810.1|UB21_00575|ARN04839.1|BJM02_00575|Probable cation-transporting ATPase I (EC 7.2.2.-)	1	8	2	4	2	3	3	1	0	2	2	0	0	0	2	0	1	2	6	1	1	1	2	2	5	1	6	3	1	1	1	2	0	0	2	0
Rv0108c|AJW51053.1|UB21_00580|ARN04840.1|BJM02_00580|Uncharacterized protein	0	0	0	0	0	0	0	0	0	0	0	0	2	0	0	2	0	0	0	0	2	0	0	0	0	0	0	0	0	0	0	0	0	0	0	0
Rv0111|AJW51054.1|UB21_00595|ARN08217.1|BJM02_00595|Possible transmembrane acyltransferase	0	0	0	0	0	0	0	2	0	0	0	0	0	0	0	0	0	0	0	0	0	0	0	0	0	0	0	0	2	0	0	0	0	0	0	0
Rv0112|AJW47812.1|UB21_00600|ARN04842.1|BJM02_00600|Possible GDP-mannose 4,6-dehydratase Gca (GDP-D-mannose dehydratase)	0	0	0	0	0	0	0	0	0	2	0	0	0	2	0	0	0	0	0	0	0	0	0	0	0	0	0	0	0	0	0	0	0	0	0	0
Rv0113|AJW47813.1|UB21_00605|ARN04843.1|BJM02_00605|Phosphoheptose isomerase (EC 5.3.1.28) (Sedoheptulose 7-phosphate isomerase)	0	0	0	0	0	0	0	0	0	0	0	0	0	0	0	0	0	0	0	0	0	0	0	0	0	0	0	0	0	0	0	0	0	0	0	0
Rv0115|AJW47814.1|UB21_00615|ARN04844.1|BJM02_00615|Possible D-alpha-D-heptose-7-phosphate kinase HddA	0	0	0	0	0	0	0	0	0	0	0	0	0	0	0	0	0	0	0	0	0	0	0	0	0	0	0	0	0	0	0	0	0	0	0	0
Rv0116c|AJW51055.1|UB21_00625|ARN08219.1|BJM02_00625|L,D-transpeptidase 1 (LDT 1) (EC 2.3.2.-) (Ldt(Mt1))	2	0	0	0	0	0	0	0	0	0	0	0	0	0	0	0	0	0	0	0	0	2	0	6	0	0	0	0	0	0	0	0	0	0	0	0
Rv0117|AJW51056.1|UB21_00630|ARN08220.1|BJM02_00630|Oxidative stress response regulatory protein OxyS	2	2	0	2	0	0	0	0	0	0	0	0	0	0	0	0	0	0	0	0	0	0	0	0	0	0	0	0	0	0	2	0	1	0	0	0
Rv0118c|AJW51057.1|UB21_00635|ARN08221.1|BJM02_00635|Probable oxalyl-CoA decarboxylase OxcA	0	0	0	0	0	0	0	0	0	0	0	0	0	0	0	0	0	0	0	0	0	0	0	0	0	0	0	0	0	0	0	0	0	1	0	0
Rv0119|AJW47816.1|UB21_00640|ARN08222.1|BJM02_00640|Probable fatty-acid-CoA ligase FadD7 (Fatty-acid-CoA synthetase) (Fatty-acid-CoA synthase)	0	0	0	0	0	0	0	0	0	0	0	0	0	0	0	0	0	0	0	0	0	0	0	0	0	0	0	0	0	0	0	0	0	0	0	0
Rv0120c|AJW47817.1|UB21_00645|ARN04846.1|BJM02_00645|Elongation factor G-like protein	0	3	3	1	0	2	0	0	1	3	0	2	4	0	0	1	3	0	2	1	0	0	1	1	1	1	0	0	1	0	0	0	1	0	0	0
Rv0121c|AJW47818.1|UB21_00650|ARN04847.1|BJM02_00650|Conserved protein	1	2	1	2	1	1	1	0	0	0	0	0	5	1	1	3	0	1	0	1	0	0	0	0	1	1	3	3	3	3	4	7	0	0	0	0
Rv0122|AJW47819.1|UB21_00655|ARN04848.1|BJM02_00655|Uncharacterized protein	0	0	0	0	0	0	0	0	0	0	0	0	0	0	0	0	0	0	0	0	0	0	0	0	0	0	0	0	0	0	0	0	0	0	0	0
Rv0123|AJW51058.1|UB21_00660|ARN08223.1|BJM02_00660|Uncharacterized protein	0	0	0	0	0	0	0	0	0	0	0	0	0	0	0	0	0	0	0	0	0	0	0	0	0	0	0	0	0	0	0	0	0	0	0	0
Rv0126|AJW47820.1|UB21_00680|ARN04850.1|BJM02_00675|Trehalose synthase/amylase TreS (EC 3.2.1.1) (EC 5.4.99.16) (Maltose alpha-D-glucosyltransferase) (MTase)	0	0	0	0	0	0	2	0	0	0	0	0	0	2	0	0	0	2	0	0	0	0	0	0	1	0	0	0	0	0	0	0	0	0	0	0
Rv0127|AJW47821.1|UB21_00685|ARN04851.1|BJM02_00680|Maltokinase (MaK) (EC 2.7.1.175) (Maltose-1-phosphate synthase)	0	1	0	0	0	0	0	0	0	0	0	0	0	0	0	0	1	0	0	0	0	0	0	0	0	0	0	0	0	0	0	0	0	0	0	0
Rv0128|AJW47822.1|UB21_00690|ARN04852.1|BJM02_00685|Probable conserved transmembrane protein	0	0	0	0	0	0	0	0	0	0	0	0	0	0	0	0	0	2	0	0	0	0	0	0	0	0	0	0	0	0	0	0	0	0	0	0
Rv0129c|AJW47823.1|UB21_00695|ARN04853.1|BJM02_00690|Diacylglycerol acyltransferase/mycolyltransferase Ag85C (DGAT) (EC 2.3.1.122) (EC 2.3.1.20) (Acyl-CoA:diacylglycerol acyltransferase) (Antigen 85 complex C) (85C) (Ag85C) (Fibronectin-binding protein C) (Fbps C)	0	0	2	0	0	0	0	0	0	0	0	1	0	0	0	0	0	0	2	0	0	0	2	0	0	0	0	0	0	0	0	0	0	0	0	0
Rv0130|AJW47824.1|UB21_00700|ARN04854.1|BJM02_00695|3-hydroxyacyl-thioester dehydratase Z (EC 4.2.1.-) (3-hydroxybutyryl-CoA dehydratase) (EC 4.2.1.55) (N-related protein) (Nodulation protein)	0	0	0	0	0	0	0	0	0	0	0	0	0	0	0	0	0	0	0	0	0	0	0	0	0	0	0	0	0	0	0	0	0	0	0	0
Rv0131c|AJW51059.1|UB21_00705|ARN04855.1|BJM02_00700|Probable acyl-CoA dehydrogenase FadE1	0	0	0	0	0	0	0	0	0	0	0	0	0	0	0	2	0	0	0	0	0	0	0	0	0	0	0	0	0	0	0	0	0	0	0	0
Rv0132c|AJW47825.1|UB21_00710|ARN04856.1|BJM02_00705|F420-dependent hydroxymycolic acid dehydrogenase (fHMAD) (EC 1.1.98.-) (FGD2)	0	0	0	0	0	0	0	0	0	0	0	0	0	0	0	0	0	1	0	0	0	0	0	0	2	0	0	0	0	0	0	0	0	0	0	0
Rv0133|AJW47826.1|UB21_00715|ARN04857.1|BJM02_00710|GCN5-related N-acetyltransferase	0	0	0	2	0	0	0	0	0	0	0	0	0	0	0	0	0	0	0	0	0	0	0	0	0	0	0	0	0	0	0	0	0	0	0	0
Rv0135c|AJW47827.1|UB21_00725|ARN04858.1|BJM02_00720|Possible transcriptional regulatory protein	0	0	0	0	1	0	0	0	0	0	0	2	0	0	0	0	0	0	0	0	0	0	0	0	0	0	0	0	2	0	0	0	0	0	0	0
Rv0136|AJW47828.1|UB21_00730|ARN04859.1|BJM02_00725|Putative cytochrome P450 138 (EC 1.14.-.-)	0	0	0	0	0	0	0	0	0	0	0	0	0	0	0	2	0	0	0	0	0	1	0	0	0	0	0	0	0	0	0	0	1	0	0	0
Rv0137c|AJW47829.1|UB21_00735|ARN04860.1|BJM02_00730|Peptide methionine sulfoxide reductase MsrA (Protein-methionine-S-oxide reductase) (EC 1.8.4.11) (Peptide-methionine (S)-S-oxide reductase) (Peptide Met(O) reductase)	0	0	0	0	0	0	0	0	0	0	0	0	0	0	0	0	0	0	0	0	0	0	0	0	0	0	0	0	0	0	0	0	1	0	0	0
Rv0138|AJW47830.1|UB21_00740|ARN04861.1|BJM02_00735|SnoaL-like domain-containing protein	0	0	0	1	1	1	0	2	0	0	0	0	8	3	4	0	0	0	0	0	0	0	0	1	0	0	0	0	6	2	2	5	2	1	0	0
Rv0139|AJW47831.1|UB21_00745|ARN04862.1|BJM02_00740|Possible oxidoreductase	0	0	0	0	1	0	0	0	0	0	0	0	0	0	0	0	0	0	0	0	0	0	0	0	0	0	0	0	0	0	0	0	0	0	0	0
Rv0140|AJW47832.1|UB21_00750|ARN04863.1|BJM02_00745|Conserved protein	0	0	0	0	1	0	0	0	0	0	0	0	0	0	0	0	0	0	0	0	0	0	0	1	0	0	2	0	0	0	0	0	0	0	0	0
Rv0141c|AJW47833.1|UB21_00755|ARN04864.1|BJM02_00750|SnoaL-like domain-containing protein	0	0	0	0	0	0	0	0	0	0	0	0	0	0	0	0	0	0	0	0	0	0	0	0	0	0	0	0	0	0	0	1	0	0	0	0
Rv0142|AJW47834.1|UB21_00760|ARN04865.1|BJM02_00755|Uncharacterized protein	0	1	1	0	0	0	1	0	0	0	0	0	0	0	0	0	0	0	0	0	0	0	0	0	0	0	0	0	0	1	0	0	0	0	0	0
Rv0143c|AJW51060.1|UB21_00765|ARN08224.1|BJM02_00760|Probable conserved transmembrane protein	0	0	0	0	0	0	0	0	0	0	0	0	0	0	0	0	0	0	2	0	0	0	0	0	0	0	0	0	0	0	0	0	0	0	0	0
Rv0144|AJW47835.1|UB21_00770|ARN04866.1|BJM02_00765|Probable transcriptional regulatory protein (Possibly TetR-family)	0	0	2	0	0	0	0	0	0	0	0	2	0	0	0	0	0	0	0	0	0	0	0	0	2	0	0	0	0	0	0	0	0	4	1	2
Rv0145|AJW47836.1|UB21_00775|ARN04867.1|BJM02_00770|Putative S-adenosyl-L-methionine-dependent methyltransferase Rv0145 (EC 2.1.1.-)	2	2	0	0	0	0	0	0	0	0	0	0	0	0	0	0	0	0	0	0	0	0	0	0	0	2	2	0	0	0	2	0	0	0	2	0
Rv0146|AJW47837.1|UB21_00780|ARN04868.1|BJM02_00775|Putative S-adenosyl-L-methionine-dependent methyltransferase Rv0146 (EC 2.1.1.-)	0	0	0	0	0	2	0	2	0	0	0	0	0	0	0	0	2	0	0	0	0	2	2	0	2	0	2	0	0	0	0	0	0	0	0	0
Rv0147|AJW51061.1|UB21_00785|ARN08225.1|BJM02_00780|Aldehyde dehydrogenase	0	2	0	0	0	1	1	0	0	0	0	0	0	0	0	0	0	1	2	0	0	0	0	0	2	1	0	1	1	0	0	0	0	0	0	0
Rv0148|AJW47838.1|UB21_00790|ARN04869.1|BJM02_00785|Putative short-chain type dehydrogenase/reductase Rv0148 (EC 1.1.1.-)	0	0	0	0	0	0	1	0	1	0	0	0	0	0	0	2	0	0	0	0	0	0	0	0	1	0	0	0	0	0	2	1	0	0	0	0
Rv0149|AJW47839.1|UB21_00795|ARN04870.1|BJM02_00790|Possible quinone oxidoreductase (NADPH:quinone oxidoreductase) (Zeta-crystallin)	0	0	0	0	0	0	0	0	0	0	0	0	0	0	0	0	0	0	0	2	0	0	0	0	3	0	0	2	0	0	0	0	0	0	0	0
Rv0150c|AJW51062.1|UB21_00800|ARN08226.1|BJM02_00795|Uncharacterized protein	0	0	0	0	0	0	0	0	0	0	0	0	0	0	0	0	0	0	0	0	0	0	0	0	0	0	0	0	0	0	0	0	2	0	0	0
Rv0151c|AJW51063.1|UB21_00805|ARN08227.1|BJM02_00800|PE family protein PE1	0	0	0	0	0	0	0	0	0	0	0	0	0	0	0	0	0	0	0	0	0	0	0	0	0	0	0	0	0	0	0	0	0	0	0	0
Rv0152c|AJW47840.1|UB21_00810|ARN04871.1|BJM02_00805|PE family protein PE2	0	0	0	0	0	0	0	0	0	0	0	0	0	0	0	0	0	0	0	0	0	0	0	0	0	0	0	0	0	0	0	0	0	0	0	0
Rv0153c|AJW47841.1|UB21_00820|ARN04872.1|BJM02_00810|Triple specificity protein phosphatase PtpB (EC 3.1.3.-) (EC 3.1.3.16) (EC 3.1.3.48) (MPtpB) (Phosphoinositide phosphatase) (Protein-serine/threonine phosphatase) (Protein-tyrosine phosphatase B) (TSP PTP)	0	0	0	0	1	0	0	0	0	0	0	0	0	0	0	0	0	0	0	0	0	0	0	0	2	0	0	0	1	0	0	0	0	0	0	0
Rv0154c|AJW47842.1|UB21_00825|ARN04873.1|BJM02_00815|Probable acyl-CoA dehydrogenase FadE2	0	0	0	0	0	0	0	0	0	0	0	0	0	0	0	0	0	0	0	0	0	0	0	2	0	0	0	0	2	0	0	0	0	0	2	0
Rv0155|AJW47844.1|UB21_00835|ARN04874.1|BJM02_00820|Probable NAD(P) transhydrogenase (Subunit alpha) PntAa [first part catalytic part] (Pyridine nucleotide transhydrogenase subunit alpha) (Nicotinamide nucleotide transhydrogenase subunit alpha)	0	0	0	0	0	0	0	0	0	0	0	0	0	0	0	0	0	0	0	0	0	0	0	0	0	0	0	0	0	0	0	0	0	0	0	0
Rv0156|AJW47845.1|UB21_00840|ARN04875.1|BJM02_00825|Proton-translocating NAD(P)(+) transhydrogenase (EC 7.1.1.1)	0	0	0	0	0	0	0	0	0	0	0	0	0	0	0	0	0	0	0	0	0	0	0	0	0	0	0	0	0	0	2	0	0	0	0	0
Rv0157|AJW51064.1|UB21_00845|ARN08228.1|BJM02_00830|NAD(P) transhydrogenase subunit beta (EC 7.1.1.1) (Nicotinamide nucleotide transhydrogenase subunit beta)	0	0	0	0	2	0	0	0	0	0	0	0	0	0	0	0	0	0	2	0	0	0	1	0	0	0	0	2	0	0	0	0	0	0	0	0
Rv0157A|AJW47846.1|UB21_00850|ARN04876.1|BJM02_00835|Conserved protein	0	0	0	0	0	0	0	0	0	0	0	0	0	0	0	0	0	0	0	0	0	0	0	0	0	0	0	0	0	0	0	0	0	0	0	0
Rv0158|AJW47847.1|UB21_00855|ARN04877.1|BJM02_00840|Probable transcriptional regulatory protein (Possibly TetR-family)	0	0	0	0	0	0	0	0	0	1	0	0	0	0	0	0	0	0	0	0	0	0	0	2	0	0	0	0	0	0	0	0	0	0	0	0
Rv0159c|AJW47848.1|UB21_00860|ARN04878.1|BJM02_00845|PE family protein PE3	0	0	0	2	0	0	0	0	0	0	0	0	0	0	0	0	0	0	0	0	0	0	0	0	0	0	0	0	0	0	0	0	0	0	0	0
Rv0160c|AJW47849.1|UB21_00865|ARN04879.1|BJM02_00850|PE family protein PE4	0	0	0	0	0	0	0	0	0	2	0	0	0	0	0	0	0	0	0	0	0	0	0	0	0	0	0	0	0	0	0	0	0	0	0	0
Rv0162c|AJW51065.1|UB21_00875|ARN08230.1|BJM02_00860|Probable zinc-type alcohol dehydrogenase (E subunit) AdhE1	0	2	0	0	0	0	0	0	0	0	0	0	0	0	0	0	0	0	0	0	0	0	0	0	0	0	0	0	0	0	0	0	0	0	0	0
Rv0163|AJW47850.1|UB21_00880|ARN04880.1|BJM02_00865|Conserved protein	0	0	0	0	0	0	0	0	0	0	0	0	0	0	0	0	0	0	0	0	0	0	0	0	0	0	0	0	0	0	0	0	0	0	0	0
Rv0164|AJW47851.1|UB21_00885|ARN04881.1|BJM02_00870|Conserved protein TB18.5	0	0	0	0	0	0	0	0	0	0	0	1	0	0	0	0	0	0	0	0	0	0	0	2	0	0	0	0	0	0	0	0	0	0	0	0
Rv0165c|AJW47852.1|UB21_00890|ARN04882.1|BJM02_00875|Probable transcriptional regulatory protein Mce1R (Probably GntR-family)	0	0	0	0	0	0	0	0	0	0	0	0	0	0	0	0	0	0	0	0	0	0	0	0	0	0	0	0	0	0	0	2	0	0	0	0
Rv0166|AJW47853.1|UB21_00895|ARN04883.1|BJM02_00880|Probable fatty-acid-CoA ligase FadD5 (Fatty-acid-CoA synthetase) (Fatty-acid-CoA synthase)	1	0	3	1	1	2	2	2	12	20	8	14	16	19	14	3	4	5	2	1	5	10	3	4	3	8	2	3	5	11	2	3	10	11	5	3
Rv0167|AJW47854.1|UB21_00900|ARN04884.1|BJM02_00885|Conserved integral membrane protein YrbE1A	0	0	0	0	0	0	0	0	0	0	0	0	2	0	0	0	0	0	0	0	0	0	0	0	0	0	1	0	0	0	0	0	0	0	0	0
Rv0168|AJW47855.1|UB21_00905|ARN04885.1|BJM02_00890|Conserved integral membrane protein YrbE1B	0	0	0	0	0	0	0	0	0	0	0	0	0	0	0	0	0	0	0	0	0	0	0	0	0	0	0	0	0	0	0	0	0	0	0	0
Rv0170|AJW47856.1|UB21_00915|ARN04887.1|BJM02_00900|Mce-family protein Mce1B	0	0	0	0	0	0	0	0	0	0	0	0	0	0	0	0	0	0	0	0	0	0	0	0	2	0	0	0	0	0	0	0	0	0	0	0
Rv0172|AJW47857.1|UB21_00925|ARN04889.1|BJM02_00910|Mce-family protein Mce1D	0	0	0	0	0	0	0	0	0	0	0	0	0	0	2	0	0	0	0	0	0	0	0	0	0	0	0	0	0	0	0	0	0	0	0	0
Rv0173|AJW51066.1|UB21_00930|ARN08231.1|BJM02_00915|Possible Mce-family lipoprotein LprK (Mce-family lipoprotein Mce1E)	0	0	0	0	0	0	0	0	0	0	0	0	0	0	0	0	0	0	0	0	0	0	0	0	0	0	0	0	0	0	0	0	0	0	0	0
Rv0175|AJW47858.1|UB21_00940|ARN04891.1|BJM02_00925|Probable conserved Mce associated membrane protein	3	0	2	2	4	0	0	3	0	2	5	1	1	1	0	0	2	0	2	0	1	1	0	2	3	1	4	1	2	1	4	2	1	0	1	2
Rv0176|AJW47859.1|UB21_00945|ARN04892.1|BJM02_00930|Probable conserved Mce associated transmembrane protein	0	0	0	1	0	0	0	1	0	0	0	0	0	0	0	0	2	0	4	0	0	0	0	0	2	0	0	1	0	0	0	0	0	2	0	0
Rv0177|AJW47860.1|UB21_00950|ARN04893.1|BJM02_00935|Probable conserved Mce associated protein	0	0	0	1	0	0	0	0	0	0	0	0	0	0	0	0	0	0	0	0	0	0	0	0	0	0	1	0	0	0	0	0	0	0	1	1
Rv0178|AJW47861.1|UB21_00955|ARN04894.1|BJM02_00940|Probable conserved Mce associated membrane protein	0	0	0	0	0	0	0	0	0	0	0	0	0	0	0	0	0	0	0	0	2	0	2	2	0	0	0	0	2	0	0	0	0	0	0	0
Rv0179c|AJW47862.1|UB21_00960|ARN04895.1|BJM02_00945|Possible lipoprotein LprO	0	0	0	0	0	0	2	0	0	0	0	0	0	0	0	0	0	0	0	0	0	0	0	0	0	0	0	0	0	0	0	0	0	0	2	0
Rv0180c|AJW47863.1|UB21_00965|ARN04896.1|BJM02_00950|Probable conserved transmembrane protein	0	0	0	0	0	0	0	0	1	0	0	0	0	0	0	0	0	0	0	0	0	0	0	0	0	0	0	1	0	1	0	0	0	0	0	0
Rv0181c|AJW47864.1|UB21_00970|ARN04897.1|BJM02_00955|Putative quercetin 2,3-dioxygenase Rv0181c (Putative quercetinase) (EC 1.13.11.24) (Pirin-like protein Rv0181c)	0	0	0	0	0	0	0	0	0	0	0	0	0	0	0	0	0	0	0	0	0	0	0	0	0	0	0	0	0	0	0	0	0	0	0	0
Rv0182c|AJW51067.1|UB21_00975|ARN08232.1|BJM02_00960|ECF RNA polymerase sigma factor SigG (ECF sigma factor SigG) (Alternative RNA polymerase sigma factor SigG) (RNA polymerase sigma-G factor) (Sigma-g factor)	11	7	4	4	8	0	2	1	1	1	1	1	3	0	0	1	6	1	1	1	1	0	0	0	1	5	0	2	1	3	0	1	2	0	0	0
Rv0183|AJW47865.1|UB21_00980|ARN04898.1|BJM02_00965|Monoacylglycerol lipase (MGL) (EC 3.1.1.23)	1	0	1	0	1	0	0	0	0	0	0	0	0	0	0	0	0	0	0	0	0	0	0	0	2	0	2	0	0	2	0	1	0	0	2	0
Rv0184|AJW47866.1|UB21_00985|ARN04899.1|BJM02_00970|DUF2786 domain-containing protein	1	0	0	0	0	0	0	0	0	0	0	0	0	0	0	0	2	0	0	0	0	0	0	0	2	0	0	0	0	0	0	0	0	0	0	0
Rv0186|AJW47867.1|UB21_00995|ARN04901.1|BJM02_00980|Probable beta-glucosidase BglS (Gentiobiase) (Cellobiase) (Beta-D-glucoside glucohydrolase)	1	0	0	0	0	0	0	0	0	0	0	0	2	0	2	0	0	0	0	0	0	0	0	0	2	2	0	0	0	0	0	0	0	0	0	0
Rv0186A|AJW47868.1|UB21_01000|ARN04902.1|BJM02_00985|Metallothionein (MT) (Copper-binding metallothionein) (Cu(I)-binding metallothionein) (Mycobacterial metallothionein)	0	1	0	0	0	0	0	0	0	0	0	0	0	0	0	0	0	0	0	0	0	0	0	0	0	0	0	0	0	0	0	0	0	0	0	0
Rv0187|AJW47869.1|UB21_01005|ARN04903.1|BJM02_00990|Catechol O-methyltransferase (COMT) (EC 2.1.1.6)	0	0	0	0	0	0	0	0	0	0	0	0	0	0	0	0	0	0	0	0	0	0	0	0	0	0	0	0	2	0	0	0	0	0	0	0
Rv0188|AJW47870.1|UB21_01010|ARN04904.1|BJM02_00995|Probable conserved transmembrane protein	0	0	0	0	0	0	0	0	1	0	0	0	1	0	0	0	0	0	0	0	0	0	0	0	0	0	0	0	0	0	2	0	0	4	2	0
Rv0189c|AJW47871.1|UB21_01015|ARN04905.1|BJM02_01000|Dihydroxy-acid dehydratase (DAD) (EC 4.2.1.9)	0	0	2	0	1	0	0	0	1	1	0	0	0	0	0	3	4	0	0	0	0	0	0	0	0	0	0	1	2	0	2	0	0	0	0	0
Rv0190|AJW47872.1|UB21_01020|ARN04906.1|BJM02_01005|Copper-sensing transcriptional repressor RicR (Regulated in copper repressor)	0	0	0	0	0	0	0	0	0	0	0	0	0	0	0	2	0	0	0	0	0	0	0	0	0	0	0	0	0	0	0	0	0	0	0	0
Rv0191|AJW47873.1|UB21_01025|ARN04907.1|BJM02_01010|Chloramphenicol efflux pump Rv0191	0	0	0	0	0	0	0	0	0	0	0	0	0	0	0	0	0	0	0	0	0	0	0	0	0	0	0	0	0	0	0	2	0	0	0	0
Rv0192|AJW47874.1|UB21_01030|ARN04908.1|BJM02_01015|L,D-transpeptidase 4 (LDT 4) (EC 2.3.2.-) (Ldt(Mt4))	0	0	0	0	0	0	0	0	0	0	2	0	0	0	0	0	0	0	0	1	3	0	3	2	0	1	0	0	1	0	0	0	0	0	2	0
Rv0193c|AJW47875.1|UB21_01035|ARN08233.1|BJM02_01020|Uncharacterized protein	0	0	0	0	0	0	0	0	0	2	2	0	2	0	0	0	0	0	0	0	0	0	0	0	0	0	0	0	0	0	0	0	0	0	0	0
Rv0194|AJW47876.1|UB21_01040|*|BJM02_01025|Multidrug efflux ATP-binding/permease protein Rv0194 (EC 7.6.2.-)	0	0	1	0	0	0	0	0	0	1	0	0	1	0	0	0	0	0	0	0	0	0	2	0	0	0	0	2	1	0	2	2	0	0	0	0
Rv0195|AJW51068.1|UB21_01045|ARN08234.1|BJM02_01030|Possible two component transcriptional regulatory protein (Probably LuxR-family)	0	0	0	0	0	0	0	0	0	0	0	0	0	0	0	0	0	0	0	0	0	0	0	0	0	0	0	0	0	0	0	0	0	0	0	0
Rv0196|AJW47877.1|UB21_01050|ARN04909.1|BJM02_01035|Uncharacterized HTH-type transcriptional regulator Rv0196	2	2	2	3	0	1	0	0	1	0	0	0	0	1	0	0	0	0	0	0	1	0	2	0	0	0	3	0	1	1	0	0	0	0	0	0
Rv0197|AJW47878.1|UB21_01055|ARN04910.1|BJM02_01040|Possible oxidoreductase	0	0	0	0	0	0	1	0	0	0	0	0	0	0	0	0	0	0	0	0	0	0	0	0	0	0	0	0	0	0	0	0	0	0	0	0
Rv0198c|AJW47879.1|UB21_01060|ARN04911.1|BJM02_01045|Probable zinc metalloprotease Zmp1	0	0	0	1	0	0	2	0	0	0	0	0	0	0	0	0	0	0	0	0	0	0	2	0	0	4	0	0	2	0	2	0	0	0	0	0
Rv0199|AJW47880.1|UB21_01065|ARN04912.1|BJM02_01050|Probable conserved membrane protein	0	2	0	0	0	1	0	0	0	0	0	0	0	0	0	0	0	0	0	1	0	0	1	0	0	1	1	0	0	1	0	0	0	0	0	0
Rv0200|AJW47881.1|UB21_01070|ARN04913.1|BJM02_01055|Possible conserved transmembrane protein	0	0	0	0	0	0	0	0	0	0	0	0	0	0	0	0	0	0	0	0	0	0	0	0	0	0	0	0	0	0	0	0	0	0	0	0
Rv0201c|AJW47882.1|UB21_01075|ARN04914.1|BJM02_01060|Conserved protein	0	0	0	0	0	0	0	0	0	0	0	0	0	0	0	0	0	0	0	0	0	0	0	0	0	0	0	0	0	0	0	0	0	0	0	0
Rv0202c|AJW47883.1|UB21_01080|*|*|Heme uptake protein MmpL11	2	0	0	1	0	0	0	0	0	0	0	0	2	0	0	0	2	0	0	0	0	0	0	0	0	0	2	0	1	0	2	0	2	0	0	0
Rv0203|AJW47884.1|UB21_01085|ARN04915.1|BJM02_01070|Heme-binding protein Rv0203	0	0	0	0	0	0	0	0	0	0	0	0	0	0	0	0	0	0	0	0	0	0	0	0	0	0	0	0	0	0	0	0	0	0	0	0
Rv0204c|AJW51069.1|UB21_01090|ARN08235.1|BJM02_01075|Probable conserved transmembrane protein	0	0	0	0	0	0	0	0	0	0	0	0	0	0	0	0	0	0	0	0	0	0	0	0	0	0	0	0	0	0	0	0	0	0	0	0
Rv0205|AJW47885.1|UB21_01095|ARN04916.1|BJM02_01080|Putative transport protein Rv0205	0	0	0	0	0	0	0	0	0	0	0	2	0	0	0	0	0	0	0	0	0	0	0	0	0	0	0	0	0	0	0	0	0	0	0	0
Rv0206c|AJW47886.1|UB21_01100|*|BJM02_01085|Trehalose monomycolate exporter MmpL3 (TMM exporter MmpL3)	2	2	2	0	0	0	0	0	0	0	2	0	0	0	1	2	0	0	0	0	0	2	0	0	0	0	2	0	0	0	2	1	0	0	0	0
Rv0208c|AJW51070.1|UB21_01110|ARN08236.1|BJM02_01095|tRNA (guanine-N(7)-)-methyltransferase (EC 2.1.1.33) (tRNA (guanine(46)-N(7))-methyltransferase) (tRNA(m7G46)-methyltransferase)	0	0	0	0	0	0	0	0	0	0	0	0	2	0	0	2	0	0	0	0	0	0	0	0	0	0	0	0	0	0	0	0	0	0	0	0
Rv0209|AJW47887.1|UB21_01115|ARN04918.1|BJM02_01100|Uncharacterized protein	1	0	0	0	0	0	0	0	0	0	0	0	0	0	0	0	0	0	0	0	0	0	0	0	0	0	0	0	0	0	0	0	0	0	0	0
Rv0210|AJW51071.1|UB21_01120|ARN04919.1|BJM02_01105|Uncharacterized protein	0	0	0	0	0	0	0	0	0	0	0	0	0	0	0	0	0	0	0	0	0	0	0	0	2	0	0	0	0	0	0	0	0	0	0	0
Rv0211|AJW47888.1|UB21_01125|ARN04920.1|BJM02_01110|Phosphoenolpyruvate carboxykinase [GTP] (PEP carboxykinase) (PEPCK) (EC 4.1.1.32) (GTP-dependent phosphoenolpyruvate carboxykinase) (GTP-PEPCK)	0	0	0	0	0	0	0	0	0	0	0	0	8	6	10	0	4	1	4	2	0	2	2	0	1	0	4	4	0	2	3	6	0	4	5	6
Rv0212c|AJW47889.1|UB21_01130|ARN04921.1|BJM02_01115|Possible transcriptional regulatory protein NadR (Probably AsnC-family)	0	2	2	0	0	0	0	0	0	0	0	0	0	0	0	0	0	0	0	0	0	0	0	0	1	0	0	0	0	0	0	0	0	0	0	0
Rv0213c|AJW51072.1|UB21_01135|ARN08237.1|BJM02_01120|Possible methyltransferase (Methylase)	0	0	0	0	0	0	0	0	0	0	0	0	0	0	0	0	0	0	0	0	0	0	0	0	0	0	0	0	0	0	0	0	0	0	0	0
Rv0214|AJW47890.1|UB21_01140|ARN04922.1|BJM02_01125|Probable fatty-acid-CoA ligase FadD4 (Fatty-acid-CoA synthetase) (Fatty-acid-CoA synthase)	0	1	0	0	1	2	0	0	0	0	0	0	0	0	0	0	1	1	0	0	1	0	0	1	2	1	5	0	0	0	0	0	0	0	0	0
Rv0216|AJW47891.1|UB21_01150|ARN04923.1|BJM02_01135|Double hotdog hydratase	0	0	0	0	0	0	0	0	0	0	0	0	0	0	0	0	0	0	0	0	0	0	0	0	0	0	0	0	0	0	0	0	0	0	0	0
Rv0217c|AJW47892.1|UB21_01155|ARN04924.1|BJM02_01140|Possible esterase LipW	0	0	0	0	0	0	0	0	0	0	0	0	0	0	0	0	0	0	0	0	0	0	0	0	0	0	0	0	0	0	0	0	0	0	0	0
Rv0218|AJW47893.1|UB21_01160|ARN04925.1|BJM02_01145|Probable conserved transmembrane protein	0	0	0	0	0	0	0	0	0	0	0	0	0	0	0	0	0	0	0	0	0	0	0	0	0	0	0	0	0	0	0	0	0	0	0	0
Rv0219|AJW47894.1|UB21_01165|ARN04926.1|BJM02_01150|Probable conserved transmembrane protein	0	0	0	0	0	0	0	0	0	0	0	0	0	0	0	0	0	0	0	0	0	0	0	0	0	0	0	0	0	0	0	0	0	0	0	0
Rv0220|AJW51073.1|UB21_01170|ARN04927.1|BJM02_01155|Esterase LipC (EC 3.1.1.-)	0	0	0	0	0	0	1	0	0	0	0	0	0	0	0	0	3	0	5	4	2	1	2	1	2	0	2	0	0	0	0	0	2	0	0	1
Rv0221|AJW47895.1|UB21_01175|ARN04928.1|BJM02_01160|Putative diacyglycerol O-acyltransferase Rv0221 (EC 2.3.1.20) (Putative triacylglycerol synthase Rv0221)	1	0	1	0	0	0	0	0	0	0	0	0	0	0	0	0	0	0	0	0	0	0	0	0	0	0	0	0	0	0	2	0	0	0	0	0
Rv0222|AJW47896.1|UB21_01180|ARN04929.1|BJM02_01165|Probable enoyl-CoA hydratase EchA1 (Enoyl hydrase) (Unsaturated acyl-CoA hydratase) (Crotonase)	0	0	0	0	0	0	0	0	0	0	0	0	0	0	0	0	0	0	0	0	0	0	0	0	0	0	0	0	0	0	0	0	0	0	0	0
Rv0223c|AJW47897.1|UB21_01185|ARN04930.1|BJM02_01170|Probable aldehyde dehydrogenase	0	1	0	0	0	0	0	0	0	0	0	0	0	0	2	0	0	0	0	0	0	0	1	0	0	0	0	0	0	0	0	0	0	0	0	2
Rv0224c|AJW51074.1|UB21_01190|ARN04931.1|BJM02_01175|Uncharacterized methyltransferase Rv0224c (EC 2.1.1.-)	0	0	0	0	0	0	0	0	0	0	0	0	0	0	0	0	0	0	0	0	0	0	1	0	0	0	0	0	0	0	0	0	0	0	0	0
Rv0225|AJW47898.1|UB21_01195|ARN04932.1|BJM02_01180|Possible conserved protein	0	0	0	0	0	0	0	0	0	0	0	0	0	0	0	0	0	0	0	0	0	0	0	0	0	0	0	0	0	0	0	0	0	0	0	0
Rv0226c|AJW47899.1|UB21_01200|ARN04933.1|BJM02_01185|Probable conserved transmembrane protein	0	0	0	1	4	0	3	2	0	0	2	1	1	1	0	1	2	1	1	6	2	1	0	3	3	2	5	1	2	1	2	5	2	2	2	1
Rv0227c|AJW47900.1|UB21_01205|ARN04934.1|BJM02_01190|Probable conserved membrane protein	0	0	0	0	0	0	0	0	0	2	0	0	0	0	0	0	0	0	0	0	0	0	0	0	0	0	0	0	0	0	0	0	0	0	0	2
Rv0228|AJW51075.1|UB21_01210|ARN08238.1|BJM02_01195|Probable integral membrane acyltransferase	0	0	0	0	0	0	0	0	0	0	0	0	0	0	0	0	0	0	0	0	0	0	0	2	0	0	0	0	0	0	0	0	0	0	0	0
Rv0229A|AJW47902.1|UB21_01220|ARN04936.1|BJM02_01205|Putative antitoxin VapB51	0	0	0	0	1	0	0	0	0	0	0	0	0	0	0	0	0	0	0	0	0	0	0	0	0	0	0	0	0	0	0	0	0	0	0	0
Rv0229c|AJW47901.1|UB21_01215|ARN04935.1|BJM02_01200|Ribonuclease VapC51 (RNase VapC51) (EC 3.1.-.-) (Toxin VapC51)	0	0	0	0	0	0	0	0	0	0	0	0	0	0	0	0	0	0	0	0	0	0	0	0	0	0	0	0	0	0	0	0	0	0	0	0
Rv0230c|AJW47903.1|UB21_01225|ARN04937.1|BJM02_01210|Phosphotriesterase homology protein	0	0	0	0	0	0	0	0	0	0	0	0	0	0	0	0	0	0	0	0	4	0	0	0	0	0	0	0	0	0	0	0	0	0	0	0
Rv0231|AJW47904.1|UB21_01230|ARN04938.1|BJM02_01215|Probable acyl-CoA dehydrogenase FadE4	0	0	0	0	0	0	0	0	1	0	0	0	0	0	0	1	0	0	1	0	0	0	0	0	0	0	0	0	0	0	0	0	0	0	0	0
Rv0232|AJW47905.1|UB21_01235|ARN04939.1|BJM02_01220|Probable transcriptional regulatory protein (Probably TetR/AcrR-family)	0	0	0	0	0	0	0	0	0	0	0	0	0	0	0	0	0	0	0	0	0	0	0	0	0	0	0	0	0	0	0	0	0	0	0	0
Rv0233|AJW47906.1|UB21_01240|ARN04940.1|BJM02_01225|R2-like ligand binding oxidase (EC 1.-.-.-) (Ribonucleotide reductase R2 subunit homolog) (Ribonucleotide reductase small subunit homolog)	1	0	0	0	0	2	0	0	0	0	0	0	0	0	0	0	0	0	0	0	0	0	0	0	0	0	0	0	0	0	0	0	0	0	2	0
Rv0234c|AJW47907.1|UB21_01245|ARN04941.1|BJM02_01230|Succinate-semialdehyde dehydrogenase [NADP(+)] 1 (SSADH 1) (SSDH 1) (EC 1.2.1.79)	0	0	0	0	0	0	0	0	2	0	3	0	0	0	0	1	0	0	0	0	2	0	0	0	0	0	0	0	0	0	2	0	0	0	0	0
Rv0235c|AJW47908.1|UB21_01250|ARN04942.1|BJM02_01235|Probable conserved transmembrane protein	0	0	0	0	0	0	0	0	0	0	0	0	0	0	0	0	0	0	0	0	0	0	0	0	0	0	0	0	0	0	0	0	0	0	0	0
Rv0236.1|AJW47909.1|UB21_01260|ARN04943.1|BJM02_01245|Putative secreted protein Rv0236.1	0	0	0	0	0	0	0	0	0	0	0	0	0	0	0	0	0	0	0	2	0	0	0	0	0	0	0	0	0	0	0	2	0	0	0	0
Rv0236c|AJW51076.1|UB21_01255|ARN08239.1|BJM02_01240|Alpha-(1->3)-arabinofuranosyltransferase (EC 2.4.2.47) (Arabinofuranan 3-O-arabinosyltransferase)	12661	12002	13597	13197	2028	2008	2300	2094	1749	1644	1848	1805	1085	1081	1210	1075	5565	5152	5697	5547	1173	1159	1275	1137	6328	5756	6601	6370	2897	2544	2930	2913	574	532	567	614
Rv0237|AJW47910.1|UB21_01265|ARN04944.1|BJM02_01250|Beta-hexosaminidase LpqI (EC 3.2.1.52) (Beta-N-acetylglucosaminidase) (Beta-N-acetylhexosaminidase)	0	0	0	0	0	0	0	0	0	0	0	0	0	0	0	0	0	0	0	0	0	0	0	0	0	0	0	0	0	0	0	0	0	0	0	0
Rv0238|AJW47911.1|UB21_01270|ARN04945.1|BJM02_01255|Possible transcriptional regulatory protein (Probably TetR-family)	0	0	0	0	0	0	1	0	0	0	0	0	0	0	0	0	0	0	2	0	0	0	0	0	0	0	0	0	0	0	0	0	0	0	0	0
Rv0239|AJW47912.1|UB21_01275|ARN04946.1|BJM02_01260|Putative antitoxin VapB24	0	0	0	0	0	0	1	0	0	0	0	0	0	0	0	0	0	0	0	0	0	0	0	0	0	0	0	0	0	0	0	0	0	0	0	0
Rv0240|AJW47913.1|UB21_01280|ARN04947.1|BJM02_01265|Ribonuclease VapC24 (RNase VapC24) (EC 3.1.-.-) (Toxin VapC24)	0	0	0	0	0	0	0	0	0	0	0	0	0	0	0	0	0	0	0	0	0	0	0	0	0	0	0	0	0	0	0	0	0	0	0	0
Rv0241c|AJW47914.1|UB21_01285|ARN04948.1|BJM02_01270|3-hydroxyacyl-thioester dehydratase X (EC 4.2.1.-) (3-hydroxybutyryl-CoA dehydratase) (EC 4.2.1.55)	0	0	0	0	0	0	0	0	0	0	0	0	0	0	0	0	0	0	0	0	0	0	0	0	0	0	0	0	0	0	0	0	0	0	0	2
Rv0243|AJW47916.1|UB21_01295|ARN04950.1|BJM02_01280|Probable acetyl-CoA acyltransferase FadA2 (3-ketoacyl-CoA thiolase) (Beta-ketothiolase)	0	0	0	0	0	0	0	0	0	0	0	0	0	0	2	0	0	0	0	0	0	0	0	0	0	0	0	0	0	0	0	0	0	0	0	0
Rv0244c|AJW47917.1|UB21_01300|ARN04951.1|BJM02_01285|Probable acyl-CoA dehydrogenase FadE5	4	2	2	0	0	0	2	2	0	0	0	2	2	0	0	4	0	0	10	2	2	0	4	0	0	0	6	9	0	0	0	2	4	0	4	6
Rv0245|AJW47918.1|UB21_01305|ARN04952.1|BJM02_01290|Possible oxidoreductase	0	0	0	0	0	0	0	0	0	0	0	0	0	0	0	0	0	0	0	0	0	0	0	0	0	0	0	0	0	0	0	0	0	0	0	0
Rv0246|AJW47919.1|UB21_01310|ARN04953.1|BJM02_01295|Probable conserved integral membrane protein	0	0	0	0	0	0	0	0	0	0	0	2	0	0	0	0	0	0	0	0	0	0	0	0	0	0	0	0	0	0	0	0	0	0	0	0
Rv0247c|AJW47920.1|UB21_01315|ARN04954.1|BJM02_01300|Probable succinate dehydrogenase [iron-sulfur subunit] (Succinic dehydrogenase)	0	0	0	0	0	0	0	0	0	0	2	0	0	0	0	0	0	0	0	0	0	2	0	0	0	0	0	0	0	0	0	0	0	0	0	0
Rv0249c|AJW47922.1|UB21_01325|ARN04956.1|BJM02_01310|Probable succinate dehydrogenase [membrane anchor subunit] (Succinic dehydrogenase)	0	0	0	0	0	0	0	0	2	0	1	0	0	0	0	0	0	0	0	0	0	0	0	0	0	0	0	0	0	0	0	0	0	0	0	0
Rv0250c|AJW47923.1|UB21_01330|ARN04957.1|BJM02_01315|Uncharacterized protein Rv0250c	0	0	0	0	0	0	0	0	0	0	0	0	0	0	0	0	0	0	0	0	0	0	0	0	0	0	0	2	0	0	0	0	0	1	0	0
Rv0251c|AJW47924.1|UB21_01335|ARN04958.1|BJM02_01320|Heat shock protein Hsp (Heat-stress-induced ribosome-binding protein A)	0	0	0	0	0	0	0	0	0	0	0	0	0	2	0	0	0	0	0	0	2	2	0	0	0	2	2	0	0	0	2	0	2	1	0	0
Rv0252|AJW51077.1|UB21_01340|ARN08240.1|BJM02_01325|Assimilatory sulfite reductase (ferredoxin) (EC 1.8.7.1)	1	0	0	1	0	1	0	1	0	0	0	1	1	0	0	0	0	0	0	0	0	0	0	0	0	0	0	0	0	0	0	2	0	0	0	2
Rv0253|AJW47925.1|UB21_01345|ARN04959.1|BJM02_01330|Probable nitrite reductase [NAD(P)H] small subunit NirD	0	0	0	0	0	0	0	0	0	0	0	0	0	0	0	0	0	0	0	0	0	0	0	0	0	0	0	0	0	0	0	0	0	0	0	0
Rv0254c|AJW47926.1|UB21_01350|ARN04960.1|BJM02_01335|Adenosylcobinamide kinase (EC 2.7.1.156) (EC 2.7.7.62) (Adenosylcobinamide-phosphate guanylyltransferase)	0	1	2	1	0	0	1	1	0	0	0	0	0	0	0	0	0	0	0	0	0	1	0	0	0	0	0	1	0	0	0	0	0	0	0	0
Rv0255c|AJW47927.1|UB21_01355|ARN04961.1|BJM02_01340|Cobyric acid synthase	0	0	0	1	0	0	0	0	0	0	0	0	0	0	0	0	0	0	0	0	0	0	1	1	0	0	1	1	2	0	0	0	0	0	0	0
Rv0257|AJW47928.1|UB21_01365|ARN08241.1|BJM02_01350|Uncharacterized protein	0	0	0	0	0	0	0	0	0	0	0	0	0	0	0	0	0	0	0	0	0	0	0	2	0	0	0	0	0	0	0	0	0	0	0	0
Rv0258c|AJW47929.1|UB21_01370|ARN04963.1|BJM02_01355|TetR_C_16 domain-containing protein	0	0	0	0	0	0	0	0	0	0	0	0	0	0	0	0	0	0	0	0	0	0	0	0	0	0	0	0	0	0	0	0	0	0	0	0
Rv0259c|AJW47930.1|UB21_01375|ARN04964.1|BJM02_01360|Uncharacterized protein	0	0	0	0	0	0	0	0	0	0	0	0	0	0	0	0	0	0	0	0	0	0	0	0	0	0	0	0	0	0	0	0	0	0	0	0
Rv0260c|AJW47931.1|UB21_01380|ARN04965.1|BJM02_01365|Possible transcriptional regulatory protein	0	0	0	0	0	0	0	0	0	0	0	0	0	0	0	0	0	0	0	0	0	0	0	0	0	0	0	0	0	0	0	0	0	0	1	0
Rv0261c|AJW47932.1|UB21_01385|ARN04966.1|BJM02_01370|Probable integral membrane nitrite extrusion protein NarK3 (Nitrite facilitator)	0	0	0	0	0	0	0	0	0	0	0	0	0	0	0	0	0	0	0	0	0	0	0	0	0	0	0	0	0	0	0	0	0	0	0	0
Rv0262c|AJW47933.1|UB21_01390|ARN04967.1|BJM02_01375|Aminoglycoside 2'-N-acetyltransferase (EC 2.3.1.-) (AAC(2')-Ic)	0	0	0	0	0	0	0	0	0	0	0	0	0	0	0	0	0	0	0	0	0	0	0	0	0	0	0	0	0	0	0	0	0	0	0	0
Rv0263c|AJW47934.1|UB21_01395|ARN04968.1|BJM02_01380|AHS2 domain-containing protein	0	0	0	0	0	0	0	0	0	0	0	0	0	0	0	0	0	0	0	0	0	0	0	0	0	0	0	0	0	0	0	0	0	0	0	0
Rv0264c|AJW47935.1|UB21_01400|ARN04969.1|BJM02_01385|AHS1 domain-containing protein	0	0	0	0	0	0	0	0	0	0	0	0	0	0	0	0	0	0	0	0	0	0	0	0	0	0	0	0	0	0	0	0	0	0	0	0
Rv0265c|AJW47936.1|UB21_01405|ARN04970.1|BJM02_01390|Probable periplasmic iron-transport lipoprotein	0	0	0	2	0	0	0	0	0	0	0	0	0	0	0	0	0	0	0	0	0	0	0	0	0	0	0	0	0	0	0	0	0	0	0	0
Rv0266c|AJW47937.1|UB21_01410|ARN04971.1|BJM02_01395|Probable 5-oxoprolinase OplA (5-oxo-L-prolinase) (Pyroglutamase) (5-OPASE)	0	0	0	0	0	0	0	0	0	0	0	0	0	0	0	0	0	0	0	0	0	0	0	0	0	0	0	0	0	0	2	0	1	0	0	0
Rv0267|AJW47938.1|UB21_01415|ARN04972.1|BJM02_01400|Nitrate/nitrite transporter	0	0	0	0	0	0	0	0	0	0	0	0	0	0	0	0	0	0	0	0	0	0	0	0	0	0	0	0	0	0	0	0	1	0	0	0
Rv0268c|AJW47939.1|UB21_01420|ARN04973.1|BJM02_01405|Putative antitoxin Rv0268c	2	0	0	0	0	0	0	0	0	0	0	0	0	0	0	0	0	0	0	2	0	0	0	0	0	0	0	0	0	0	0	0	0	0	0	0
Rv0269c|AJW47940.1|UB21_01425|ARN04974.1|BJM02_01410|Uncharacterized protein	0	0	0	1	0	0	0	0	0	0	0	0	0	0	0	0	0	0	0	0	0	0	0	0	0	0	0	0	0	0	0	0	0	0	0	0
Rv0270|AJW47941.1|UB21_01430|ARN04975.1|BJM02_01415|Probable fatty-acid-CoA ligase FadD2 (Fatty-acid-CoA synthetase) (Fatty-acid-CoA synthase)	0	0	2	0	0	0	0	2	0	0	0	0	0	2	0	0	0	0	0	0	0	2	0	0	0	0	0	2	0	0	0	2	2	0	2	0
Rv0271c|AJW47942.1|UB21_01435|ARN04976.1|BJM02_01420|Probable acyl-CoA dehydrogenase FadE6	1	0	2	0	0	0	0	0	2	0	0	0	0	2	0	0	2	1	2	1	0	0	0	0	3	0	0	0	0	2	0	1	0	0	0	0
Rv0272c|AJW47943.1|UB21_01440|ARN04977.1|BJM02_01425|Uncharacterized protein	0	0	0	0	0	0	0	0	0	0	2	0	0	0	0	0	0	0	0	0	0	0	0	0	0	0	0	0	0	0	0	0	0	0	0	0
Rv0273c|AJW47944.1|UB21_01445|ARN04978.1|BJM02_01430|Possible transcriptional regulatory protein	2	2	3	12	0	0	3	0	0	0	0	0	0	0	2	0	2	0	1	2	0	0	0	1	2	0	1	1	1	0	2	2	0	0	0	2
Rv0274|AJW47945.1|UB21_01450|ARN04979.1|BJM02_01435|Conserved protein	0	0	0	0	0	0	0	0	0	0	0	0	0	0	0	0	0	0	0	0	0	0	0	0	0	0	0	0	0	0	0	0	0	0	0	0
Rv0275c|AJW47946.1|UB21_01455|ARN04980.1|BJM02_01440|Possible transcriptional regulatory protein (Possibly TetR-family)	0	0	0	0	0	0	0	0	0	0	0	0	0	0	0	0	0	0	0	0	2	0	0	0	0	0	0	0	0	0	0	0	0	0	0	0
Rv0276|AJW47947.1|UB21_01460|ARN04981.1|BJM02_01445|DUF2236 domain-containing protein	0	4	0	0	0	2	0	0	0	0	0	0	2	0	0	0	0	0	0	0	0	2	0	0	0	0	0	0	0	0	0	0	0	2	2	0
Rv0277c|AJW47948.1|UB21_01465|ARN04982.1|BJM02_01450|Ribonuclease VapC25 (RNase VapC25) (EC 3.1.-.-) (Toxin VapC25)	0	0	2	0	0	0	0	0	0	0	0	0	0	0	0	0	0	0	0	0	0	0	0	0	0	0	0	0	0	0	0	0	0	0	0	0
Rv0280|AJW47952.1|UB21_01495|ARN04986.1|BJM02_01480|Uncharacterized PPE family protein PPE3	0	0	0	0	0	0	0	0	0	2	0	0	0	0	0	0	0	0	0	1	2	2	0	0	0	0	4	0	2	0	0	0	0	5	2	8
Rv0281|AJW47953.1|UB21_01500|ARN04987.1|BJM02_01485|Putative S-adenosyl-L-methionine-dependent methyltransferase Rv0281 (EC 2.1.1.-)	0	0	0	0	0	0	0	0	0	0	0	0	0	0	0	2	0	0	0	0	0	0	0	0	0	0	0	0	0	2	0	2	0	0	0	0
Rv0282|AJW47954.1|UB21_01505|ARN04988.1|BJM02_01490|ESX-3 secretion system protein EccA3 (ESX conserved component A3) (Type VII secretion system protein EccA3) (T7SS protein EccA3)	2	2	0	3	2	0	0	2	0	1	1	2	4	3	3	0	0	2	1	0	4	2	3	4	2	4	5	5	4	2	0	5	0	0	3	2
Rv0283|AJW47955.1|UB21_01510|ARN04989.1|BJM02_01495|ESX-3 secretion system ATPase EccB3 (EC 3.6.-.-) (ESX conserved component B3) (Type VII secretion system protein EccB3) (T7SS protein EccB3)	3	0	0	2	0	0	0	0	0	0	0	0	0	4	2	0	3	0	2	0	0	0	0	3	0	0	2	1	2	0	0	0	0	0	2	0
Rv0284|AJW47956.1|UB21_01515|ARN04990.1|BJM02_01500|ESX-3 secretion system protein EccC3 (ESX conserved component C3) (Type VII secretion system protein EccC3) (T7SS protein EccC3)	2	0	2	0	2	0	0	0	2	0	2	0	0	0	0	4	0	4	0	2	4	2	0	0	8	2	2	0	2	4	6	2	2	0	0	3
Rv0285|AJW47957.1|UB21_01520|ARN04991.1|BJM02_01505|PE family immunomodulator PE5	0	0	0	0	0	0	0	0	0	0	0	0	0	0	0	0	0	0	2	0	0	0	0	0	0	0	0	0	0	0	0	0	0	0	0	0
Rv0286|AJW47958.1|UB21_01525|ARN04992.1|BJM02_01510|PPE family protein PPE4	1	0	0	0	2	0	2	0	0	2	4	0	1	0	0	0	0	0	1	0	0	2	0	0	0	0	2	2	2	0	0	1	1	0	0	4
Rv0287|AJW47959.1|UB21_01530|ARN04993.1|BJM02_01515|ESAT-6-like protein EsxG (Conserved protein TB9.8)	1	0	0	0	0	2	0	0	0	0	2	2	2	0	2	2	1	0	4	0	0	0	2	0	3	0	0	0	0	0	0	1	1	1	3	0
Rv0288|AJW47960.1|UB21_01535|ARN04994.1|BJM02_01520|ESAT-6-like protein EsxH (10 kDa antigen CFP7) (CFP-7) (Low molecular weight protein antigen 7) (Protein TB10.4)	0	0	1	0	0	0	0	0	0	0	0	0	6	1	0	2	2	2	0	0	0	0	0	1	1	2	0	0	0	0	1	0	0	2	2	3
Rv0289|AJW47961.1|UB21_01540|ARN04995.1|BJM02_01525|ESX-3 secretion-associated protein EspG3	4	0	1	0	1	0	0	0	0	0	0	0	1	1	2	0	0	0	0	0	0	2	0	0	0	0	1	0	0	0	1	2	2	0	0	0
Rv0290|AJW47962.1|UB21_01545|ARN04996.1|BJM02_01530|ESX-3 secretion system protein EccD3 (ESX conserved component D3) (Type VII secretion system protein EccD3) (T7SS protein EccD3)	0	1	0	0	0	0	0	2	0	0	0	0	0	0	0	0	0	0	0	2	0	0	0	0	0	2	0	0	0	0	0	0	0	0	2	0
Rv0291|AJW47963.1|UB21_01550|ARN04997.1|BJM02_01535|Mycosin-3 (EC 3.4.21.-) (MycP3 protease)	0	0	0	2	0	0	0	0	0	0	0	4	0	0	0	0	0	0	0	0	4	2	0	2	0	0	0	0	2	2	2	0	0	2	0	0
Rv0292|AJW47964.1|UB21_01555|ARN04998.1|BJM02_01540|ESX-3 secretion system protein EccE3 (ESX conserved component E3) (Type VII secretion system protein EccE3) (T7SS protein EccE3)	0	0	0	0	0	0	0	0	0	1	0	0	0	4	0	2	0	0	0	0	0	0	0	0	0	0	0	0	0	0	2	0	0	0	2	0
Rv0293c|AJW51078.1|UB21_01560|ARN08242.1|BJM02_01545|Conserved protein	0	0	0	0	0	0	0	0	0	0	0	0	0	0	0	0	0	0	0	0	0	0	0	0	0	0	0	0	0	0	0	0	0	0	0	0
Rv0294|AJW47965.1|UB21_01565|ARN04999.1|BJM02_01550|Probable trans-aconitate 2-methyltransferase (EC 2.1.1.144)	0	0	0	0	0	0	0	0	0	0	0	0	0	0	0	0	0	0	0	0	0	0	0	0	0	0	0	0	0	0	0	0	0	0	0	0
Rv0295c|AJW47966.1|UB21_01570|ARN05000.1|BJM02_01555|Trehalose 2-sulfotransferase (EC 2.8.2.37)	0	0	0	0	0	0	0	0	0	0	0	0	0	0	0	0	0	0	0	0	0	0	0	0	0	0	0	0	0	0	0	0	0	0	0	0
Rv0296c|AJW51079.1|UB21_01575|*|BJM02_01560|Probable sulfatase	0	0	0	0	0	0	0	0	0	0	0	0	0	0	2	0	0	0	0	0	0	0	0	0	0	0	0	0	0	0	0	0	0	0	0	0
Rv0298|AJW47968.1|UB21_01585|ARN05001.1|BJM02_01570|Antitoxin Rv0298	0	0	0	0	0	0	0	0	0	0	2	0	0	2	1	0	0	0	0	0	0	0	0	0	0	0	0	0	0	2	0	0	0	0	0	0
Rv0299|AJW47969.1|UB21_01590|ARN05002.1|BJM02_01575|Toxin Rv0299	0	0	0	0	0	0	0	0	0	0	0	2	1	0	0	0	0	0	0	0	0	0	0	0	0	0	0	0	0	1	0	2	0	0	0	0
Rv0300|AJW47970.1|UB21_01595|ARN05003.1|BJM02_01580|Antitoxin VapB2	0	0	0	0	0	0	0	0	0	0	0	0	1	0	0	0	0	0	0	0	0	0	0	0	0	0	0	0	0	1	0	0	0	0	0	0
Rv0301|AJW47971.1|UB21_01600|ARN05004.1|BJM02_01585|Ribonuclease VapC2 (RNase VapC2) (EC 3.1.-.-) (Toxin VapC2)	0	0	0	0	0	0	0	0	0	0	0	0	0	0	0	0	0	0	0	0	0	0	0	0	0	0	0	0	0	0	0	0	0	0	0	0
Rv0302|AJW47972.1|UB21_01605|ARN05005.1|BJM02_01590|Probable transcriptional regulatory protein (Probably TetR/AcrR-family)	0	0	0	0	0	0	0	0	0	0	0	0	0	0	0	0	0	0	0	1	0	0	0	0	0	0	0	0	0	0	0	0	0	0	0	0
Rv0303|AJW47973.1|UB21_01610|ARN05006.1|BJM02_01595|Probable dehydrogenase/reductase	0	0	0	0	0	0	0	0	0	0	0	0	0	0	0	0	0	0	0	0	0	0	0	0	0	0	0	0	0	2	0	0	0	0	0	0
Rv0304c|AJW47974.1|UB21_01615|ARN05007.1|BJM02_01600|PPE family protein PPE5	0	4	0	0	0	0	0	0	3	0	1	2	0	0	0	0	0	0	0	0	2	0	0	0	0	0	0	0	0	0	0	0	0	2	0	2
Rv0306|AJW47975.1|UB21_01620|ARN05008.1|BJM02_01605|Putative oxidoreductase	0	0	0	0	0	0	0	0	0	0	0	0	0	0	0	0	0	0	0	0	0	0	0	0	0	0	0	1	0	0	0	0	0	0	0	0
Rv0307c|AJW47976.1|UB21_01625|ARN05009.1|BJM02_01610|Uncharacterized protein	0	0	0	0	0	0	0	0	0	0	0	0	0	0	0	0	0	0	0	0	0	0	0	0	0	0	0	0	0	0	0	0	0	0	0	0
Rv0308|AJW47977.1|UB21_01630|ARN05010.1|BJM02_01615|Probable conserved integral membrane protein	0	0	0	0	0	0	0	0	0	0	0	0	0	0	0	0	0	0	0	0	0	0	0	0	0	0	0	2	0	0	0	0	0	0	0	2
Rv0309|AJW47978.1|UB21_01635|ARN05011.1|BJM02_01620|Possible conserved exported protein	0	0	0	0	0	0	0	0	0	0	0	0	0	0	0	0	0	2	0	0	0	0	0	0	0	0	0	0	0	0	0	0	0	0	0	0
Rv0310c|AJW47979.1|UB21_01640|ARN05012.1|BJM02_01625|Conserved protein	0	0	0	0	0	0	0	2	0	0	0	0	0	0	0	0	0	0	0	0	0	0	0	0	0	0	0	0	0	0	0	0	0	0	0	0
Rv0311|AJW47980.1|UB21_01645|ARN05013.1|BJM02_01630|Uncharacterized protein	0	0	0	0	0	0	0	0	0	0	0	0	0	0	0	0	0	0	0	0	0	0	0	0	0	0	0	2	0	0	0	0	0	2	0	0
Rv0312|AJW47981.1|UB21_01650|ARN05014.1|BJM02_01635|Conserved hypothetical proline and threonine rich protein	0	0	0	0	0	0	0	0	0	0	0	0	0	0	0	0	1	0	0	0	0	0	0	0	0	0	2	0	0	0	0	0	0	0	0	0
Rv0313|AJW47982.1|UB21_01655|ARN05015.1|BJM02_01640|Uncharacterized protein Rv0313	0	0	0	0	0	0	0	0	0	0	0	0	0	0	0	0	0	0	0	0	2	0	0	0	2	0	1	2	0	0	0	2	0	0	0	2
Rv0314c|AJW47983.1|UB21_01660|ARN05016.1|BJM02_01645|Possible conserved membrane protein	0	0	0	0	0	0	0	0	0	0	0	0	0	0	0	2	0	0	0	0	0	0	0	0	0	0	0	0	0	0	0	0	0	0	0	0
Rv0315|AJW47984.1|UB21_01665|ARN05017.1|BJM02_01650|Possible beta-1,3-glucanase	0	0	0	0	1	0	0	0	0	0	0	0	0	0	0	0	0	0	0	0	2	2	0	0	0	0	0	0	0	0	0	0	0	0	0	0
Rv0316|AJW51080.1|UB21_01670|*|BJM02_01655|Possible muconolactone isomerase	0	0	0	0	0	0	0	0	0	0	0	0	0	0	0	0	0	0	0	0	0	0	0	0	0	0	0	0	0	0	0	0	0	0	0	0
Rv0317c|AJW47985.1|UB21_01675|ARN05018.1|BJM02_01660|Possible glycerophosphoryl diester phosphodiesterase GlpQ2 (Glycerophosphodiester phosphodiesterase)	0	0	0	0	0	0	0	0	0	0	0	0	0	0	0	0	0	0	0	0	0	0	0	2	0	0	0	0	0	1	0	0	0	0	0	0
Rv0318c|AJW51081.1|UB21_01685|ARN08243.1|BJM02_01670|Probable conserved integral membrane protein	0	0	0	1	0	1	0	0	0	0	0	0	0	0	0	0	0	0	0	0	0	0	0	0	0	0	0	1	2	1	0	0	0	0	0	0
Rv0319|AJW47986.1|UB21_01690|ARN05019.1|BJM02_01675|Pyrrolidone-carboxylate peptidase (EC 3.4.19.3) (5-oxoprolyl-peptidase) (Pyroglutamyl-peptidase I) (PGP-I) (Pyrase)	0	0	0	0	0	0	0	0	0	0	0	0	0	0	0	0	0	0	0	0	0	0	0	0	0	0	0	0	0	2	0	0	0	0	0	0
Rv0320|AJW47987.1|UB21_01695|ARN05020.1|BJM02_01680|Possible conserved exported protein	0	0	0	0	0	0	0	0	0	0	0	0	0	0	0	0	0	0	0	0	0	0	0	0	0	0	0	0	0	0	0	0	0	0	0	0
Rv0321|AJW47988.1|UB21_01700|ARN05021.1|BJM02_01685|dCTP deaminase, dUMP-forming (EC 3.5.4.30) (Bifunctional dCTP deaminase:dUTPase) (DCD-DUT)	0	2	0	0	0	0	0	0	0	0	0	0	0	0	0	0	0	0	0	0	0	0	0	0	0	0	0	0	0	0	0	0	0	0	0	0
Rv0322|AJW47989.1|UB21_01705|ARN05022.1|BJM02_01690|UDP-glucose 6-dehydrogenase (EC 1.1.1.22)	0	0	0	4	0	0	0	2	0	0	0	2	0	0	0	2	0	0	0	0	0	1	0	0	4	0	0	0	0	0	0	0	0	0	0	0
Rv0323c|AJW47990.1|UB21_01710|ARN05023.1|BJM02_01695|Uncharacterized protein	2	0	0	0	0	0	0	0	0	0	0	0	0	0	0	0	0	0	0	0	0	0	0	0	0	0	0	0	0	0	0	0	0	0	0	0
Rv0324|AJW47991.1|UB21_01715|ARN05024.1|BJM02_01700|Thiosulfate sulfurtransferase (EC 2.8.1.1)	0	0	0	0	0	0	0	0	0	0	0	0	0	0	0	0	0	0	0	0	0	0	0	0	0	0	0	0	0	0	0	0	0	0	0	0
Rv0326|AJW47992.1|UB21_01720|ARN05025.1|BJM02_01705|Methyltransf_25 domain-containing protein	0	0	0	0	0	0	0	0	0	0	0	0	0	0	0	0	0	0	0	0	0	0	0	0	0	0	0	0	0	0	0	0	0	0	0	0
Rv0327c|AJW47993.1|UB21_01725|ARN05026.1|BJM02_01710|Putative cytochrome P450 135A1 (EC 1.14.-.-)	0	0	0	0	0	0	0	0	0	0	0	0	0	0	0	0	0	0	0	0	0	0	0	0	0	0	0	0	0	0	0	0	0	0	0	0
Rv0328|AJW47994.1|UB21_01730|ARN05027.1|BJM02_01715|Possible transcriptional regulatory protein (Possibly TetR/AcrR-family)	0	0	0	0	0	0	0	0	0	0	0	0	0	0	0	0	0	0	0	0	0	0	0	0	0	0	0	0	0	0	0	0	0	0	0	0
Rv0329c|AJW47995.1|UB21_01735|ARN05028.1|BJM02_01720|Methyltransf_11 domain-containing protein	0	0	0	0	0	0	0	0	1	0	0	0	0	0	0	0	0	0	0	0	0	0	0	0	0	0	0	0	0	0	0	0	0	0	0	0
Rv0330c|AJW47996.1|UB21_01740|ARN05029.1|BJM02_01725|HTH tetR-type domain-containing protein	1	1	0	1	32	28	36	33	7	2	2	2	1	2	0	2	74	86	81	71	5	6	13	15	130	113	125	123	6	5	6	8	4	6	7	5
Rv0331|AJW47997.1|UB21_01745|ARN05030.1|BJM02_01730|Possible dehydrogenase/reductase	0	0	0	0	0	0	0	0	0	0	0	0	0	0	0	0	0	0	0	0	0	0	0	0	0	0	0	0	0	0	0	0	0	0	0	0
Rv0332|AJW47998.1|UB21_01750|ARN05031.1|BJM02_01735|Conserved protein	0	0	0	0	0	0	0	0	0	0	0	0	0	0	0	0	0	1	0	0	0	0	0	0	0	0	0	0	0	0	0	0	0	0	0	0
Rv0333|AJW51082.1|UB21_01755|ARN08244.1|BJM02_01740|SnoaL-like domain-containing protein	0	0	0	0	0	0	0	0	0	0	0	0	0	0	0	0	0	0	0	0	0	0	0	0	0	0	0	0	0	0	0	0	0	0	0	0
Rv0334|AJW47999.1|UB21_01760|ARN05032.1|BJM02_01745|Glucose-1-phosphate thymidylyltransferase (EC 2.7.7.24) (dTDP-glucose pyrophosphorylase) (dTDP-glucose synthase)	0	0	2	0	0	0	0	0	0	0	0	0	0	0	0	1	0	0	0	0	0	0	0	0	0	0	0	0	0	1	0	0	0	0	0	0
Rv0335c|AJW48000.1|UB21_01765|ARN05033.1|BJM02_01750|PE family protein PE6	0	0	0	0	0	0	0	0	0	0	0	0	0	0	0	0	0	0	0	0	0	0	1	0	0	0	0	0	0	0	0	0	0	0	0	0
Rv0336|AJW51083.1|UB21_01770|ARN08267.1|BJM02_02675|Conserved 13E12 repeat family protein	0	0	0	0	0	0	1	0	0	0	0	0	0	0	0	0	0	0	0	0	0	2	0	0	0	0	0	1	2	0	2	0	0	0	0	0
Rv0337c|AJW48001.1|UB21_01775|ARN05034.1|BJM02_01760|Alanine aminotransferase (EC 2.6.1.2) (Alanine transaminase) (Transaminase A)	0	0	0	0	0	0	0	0	0	0	0	0	0	0	0	0	0	0	0	0	0	0	0	0	0	0	0	0	0	0	0	0	0	0	0	0
Rv0338c|AJW48002.1|UB21_01780|ARN05035.1|BJM02_01765|Probable iron-sulfur-binding reductase	0	0	0	1	0	0	0	0	0	0	0	4	0	2	0	0	0	0	0	0	0	0	2	0	0	0	0	0	0	0	0	4	0	0	0	0
Rv0339c|AJW48003.1|UB21_01785|ARN05036.1|BJM02_01770|Possible transcriptional regulatory protein	0	0	0	0	0	0	0	0	0	0	0	2	0	0	0	0	0	0	0	0	0	0	0	0	0	0	0	0	0	0	0	0	0	0	0	0
Rv0340|AJW48004.1|UB21_01790|ARN05037.1|BJM02_01775|Conserved protein	0	0	0	0	0	0	0	0	0	0	0	0	0	0	0	2	0	0	0	0	0	0	0	0	0	0	0	0	0	0	0	0	0	0	0	0
Rv0341|AJW51084.1|UB21_01795|ARN08245.1|BJM02_01780|Isoniazid-induced protein IniB	0	0	0	0	0	0	0	0	0	0	0	0	0	0	0	0	0	0	0	0	0	0	0	0	0	0	0	0	0	0	0	0	0	0	0	0
Rv0342|AJW48005.1|UB21_01800|ARN05038.1|BJM02_01785|Isoniazid-induced protein IniA	0	0	0	0	0	0	0	0	0	0	0	0	0	1	0	0	0	0	2	0	0	0	0	0	0	0	0	0	0	0	0	0	0	0	0	0
Rv0343|AJW48006.1|UB21_01805|ARN05039.1|BJM02_01790|Isoniazid-induced protein IniC	0	0	0	0	0	1	0	0	0	0	0	0	0	0	0	0	0	0	0	0	0	0	0	0	0	0	1	0	0	0	0	0	0	0	2	4
Rv0344c|AJW48007.1|UB21_01810|ARN05040.1|BJM02_01795|Probable lipoprotein LpqJ	0	0	0	0	0	2	0	0	0	0	0	0	0	0	0	0	0	0	0	0	0	0	0	0	0	0	0	0	0	0	0	0	0	0	0	0
Rv0345|AJW48008.1|UB21_01815|ARN05041.1|BJM02_01800|NTP_transf_3 domain-containing protein	0	0	0	0	0	0	0	0	0	0	0	1	0	0	0	0	0	0	0	0	0	0	0	0	0	0	0	0	0	0	0	0	0	0	0	0
Rv0347|AJW48009.1|UB21_01825|ARN05043.1|BJM02_01810|Probable conserved membrane protein	0	0	0	0	0	0	0	0	0	0	0	0	0	0	0	0	0	0	0	0	0	0	0	0	0	1	0	0	0	0	0	0	0	0	0	0
Rv0348|AJW48010.1|UB21_01830|ARN05044.1|BJM02_01815|Possible transcriptional regulatory protein	0	0	0	1	0	0	0	0	0	0	0	0	0	0	0	2	0	0	0	0	0	2	0	0	1	0	0	0	0	0	0	0	0	0	0	0
Rv0349|AJW48011.1|UB21_01835|ARN05045.1|BJM02_01820|Uncharacterized protein	0	0	0	0	0	0	0	0	0	0	0	0	0	0	0	0	0	0	2	0	0	0	0	0	0	0	0	0	1	0	0	0	0	0	0	0
Rv0351|AJW48013.1|UB21_01845|ARN05047.1|BJM02_01830|Protein GrpE (HSP-70 cofactor)	0	0	0	0	0	0	0	0	0	0	0	0	0	0	0	0	0	0	0	0	0	0	0	0	0	0	0	4	0	0	0	2	0	2	0	0
Rv0352|AJW48014.1|UB21_01850|ARN05048.1|BJM02_01835|Chaperone protein DnaJ 1	0	0	0	0	0	0	1	0	2	0	0	0	0	0	0	0	1	0	0	0	0	0	0	2	0	0	1	0	1	2	0	0	1	0	0	0
Rv0353|AJW48015.1|UB21_01855|ARN05049.1|BJM02_01840|Probable heat shock protein transcriptional repressor HspR (MerR family)	0	1	0	0	0	0	0	0	0	0	0	0	0	0	0	0	0	0	0	0	0	0	0	0	0	0	0	0	0	0	0	0	0	0	0	0
Rv0356c|AJW48016.1|UB21_01865|ARN05050.1|BJM02_01850|Conserved protein	0	0	0	0	0	0	0	0	0	0	0	0	0	0	0	0	0	0	0	0	0	0	0	0	0	0	0	0	0	0	0	0	0	0	0	0
Rv0357c|AJW48017.1|UB21_01870|ARN05051.1|BJM02_01855|Adenylosuccinate synthetase (AMPSase) (AdSS) (EC 6.3.4.4) (IMP--aspartate ligase)	0	0	0	0	0	0	0	0	0	0	0	0	0	0	0	0	0	0	0	0	0	0	0	0	0	0	0	0	0	0	0	0	0	0	0	0
Rv0358|AJW48018.1|UB21_01875|ARN05052.1|BJM02_01860|Conserved protein	0	0	0	0	0	0	0	0	0	0	0	0	0	0	0	0	0	0	0	0	0	0	0	0	0	0	0	0	0	0	0	0	0	0	0	0
Rv0359|AJW48019.1|UB21_01880|ARN05053.1|BJM02_01865|Putative zinc metalloprotease Rip2	0	0	0	0	0	0	0	0	0	0	0	0	0	0	0	0	0	0	0	0	0	0	0	0	0	0	0	0	0	0	0	0	0	0	0	0
Rv0360c|AJW48020.1|UB21_01885|ARN05054.1|BJM02_01870|Conserved protein	0	0	0	0	0	0	0	0	0	0	0	0	0	0	0	0	0	0	0	0	0	0	0	0	0	0	0	0	0	0	0	0	0	0	0	0
Rv0361|AJW48021.1|UB21_01890|ARN05055.1|BJM02_01875|Probable conserved membrane protein	0	0	0	0	0	0	0	0	0	0	0	0	0	0	6	0	0	0	0	0	2	0	0	2	2	0	0	0	0	0	0	0	0	0	0	0
Rv0362|AJW48022.1|UB21_01895|ARN05056.1|BJM02_01880|Magnesium transporter MgtE	0	0	0	0	0	0	0	0	0	0	0	0	0	0	0	0	0	0	0	0	0	0	0	0	0	0	0	0	0	0	0	0	0	0	0	0
Rv0363c|AJW48023.1|UB21_01900|ARN05057.1|BJM02_01885|Fructose-bisphosphate aldolase (FBP aldolase) (FBPA) (EC 4.1.2.13) (Fructose-1,6-bisphosphate aldolase)	0	2	0	0	0	0	0	0	0	0	0	0	0	0	0	0	0	0	0	0	2	0	0	0	0	0	0	0	0	2	0	0	0	0	0	0
Rv0364|AJW48024.1|UB21_01905|ARN05058.1|BJM02_01890|Uncharacterized membrane protein Rv0364	0	0	0	0	0	0	0	0	0	1	0	0	0	0	0	0	0	0	0	0	0	0	0	0	0	0	0	0	0	0	0	2	0	0	0	0
Rv0365c|AJW48025.1|UB21_01910|ARN05059.1|BJM02_01895|Conserved protein	0	0	0	0	0	0	0	0	0	0	0	0	0	0	0	0	2	2	2	0	1	1	1	1	0	0	0	0	0	0	0	0	1	0	0	0
Rv0366c|AJW48026.1|UB21_01915|ARN05060.1|BJM02_01900|UDP-N-acetylglucosamine kinase (EC 2.7.1.176)	1	0	0	0	0	0	0	0	0	0	0	0	0	0	0	0	0	0	0	0	0	0	0	0	0	0	0	0	0	0	0	0	0	0	0	0
Rv0367c|AJW48027.1|UB21_01920|ARN05061.1|BJM02_01905|Uncharacterized protein	0	0	0	0	0	0	0	0	0	0	0	0	0	0	0	0	0	0	0	0	0	0	0	0	0	0	0	0	0	0	0	0	0	0	0	0
Rv0368c|AJW48029.1|UB21_01930|ARN05062.1|BJM02_01910|VWFA domain-containing protein	0	0	0	0	0	0	0	0	0	0	0	0	0	0	0	0	0	0	0	0	0	0	0	0	0	0	0	0	0	0	0	0	0	0	0	0
Rv0369c|AJW48030.1|UB21_01935|ARN05063.1|BJM02_01915|Possible membrane oxidoreductase	0	0	0	0	0	0	0	0	0	0	0	0	0	0	0	0	0	0	0	0	0	0	0	0	0	0	0	0	0	0	0	0	0	0	0	0
Rv0370c|AJW48031.1|UB21_01940|ARN05064.1|BJM02_01920|Possible oxidoreductase	0	0	0	0	0	0	0	0	0	0	0	0	0	0	0	0	0	0	0	0	0	0	0	0	0	0	0	0	0	0	0	0	0	0	0	0
Rv0371c|AJW48032.1|UB21_01945|ARN05065.1|BJM02_01925|NTP_transf_3 domain-containing protein	0	0	0	0	0	0	0	0	0	0	0	0	0	0	0	0	0	0	0	0	0	0	0	0	0	0	0	0	0	0	0	0	0	0	0	0
Rv0372c|AJW48033.1|UB21_01950|ARN05066.1|BJM02_01930|Uncharacterized protein	0	0	0	0	0	0	0	0	0	0	0	0	0	0	0	0	0	0	0	0	2	0	0	0	0	0	0	0	0	0	0	0	0	0	0	0
Rv0373c|AJW48034.1|UB21_01955|ARN05067.1|BJM02_01935|Probable carbon monoxyde dehydrogenase (Large chain)	1	0	0	0	0	0	0	0	0	0	0	0	0	2	0	0	0	0	0	0	0	0	0	0	0	1	0	0	0	0	0	0	0	0	0	0
Rv0374c|AJW48035.1|UB21_01960|ARN05068.1|BJM02_01940|Probable carbon monoxyde dehydrogenase (Small chain)	0	0	0	0	0	0	0	0	0	0	0	0	0	2	0	0	0	0	0	0	0	0	0	0	0	0	0	0	0	0	0	0	0	0	0	0
Rv0377|AJW48036.1|UB21_01975|ARN05070.1|BJM02_01955|Uncharacterized HTH-type transcriptional regulator Rv0377	0	0	0	0	0	0	0	0	0	0	0	0	0	0	0	0	0	0	0	0	0	0	0	0	0	0	0	0	0	0	0	0	0	0	0	0
Rv0379|AJW48037.1|UB21_01985|ARN05072.1|BJM02_01965|Calcium dodecin	0	0	0	0	0	0	0	0	0	0	0	0	0	2	0	0	0	0	0	0	0	0	0	0	0	0	2	2	0	0	0	0	0	0	0	0
Rv0380c|AJW48038.1|UB21_01990|*|BJM02_01970|Possible RNA methyltransferase (RNA methylase)	0	0	0	0	0	0	0	0	0	0	0	0	0	0	0	0	0	1	0	0	0	0	0	0	0	0	0	0	0	0	0	0	2	1	0	0
Rv0381c|AJW48039.1|UB21_01995|ARN05073.1|BJM02_01975|Uncharacterized protein	0	0	1	0	0	0	0	0	0	0	0	0	0	0	0	0	0	1	0	0	0	0	2	0	0	0	0	0	0	0	0	0	0	1	0	0
Rv0382c|AJW48040.1|UB21_02000|ARN05074.1|BJM02_01980|Orotate phosphoribosyltransferase (OPRT) (OPRTase) (EC 2.4.2.10)	0	0	0	0	0	0	0	0	0	0	0	0	0	0	0	0	0	0	2	0	0	0	0	0	0	0	0	0	0	0	0	0	0	0	0	0
Rv0383c|AJW48041.1|UB21_02005|ARN05075.1|BJM02_01985|Possible conserved secreted protein	2	1	0	0	0	0	0	0	0	0	0	0	0	0	2	0	0	1	0	0	0	0	0	0	0	1	1	0	0	0	0	0	0	0	0	0
Rv0385|AJW48042.1|UB21_02015|ARN05076.1|BJM02_01995|Flavohemoglobin (EC 1.14.12.17) (Flavohemoprotein) (Hemoglobin-like protein) (Nitric oxide dioxygenase)	0	0	0	0	0	0	0	0	0	1	0	0	0	0	0	0	0	0	0	0	0	1	0	0	0	0	0	0	0	0	0	0	0	0	0	0
Rv0386|AJW48043.1|UB21_02020|ARN05077.1|BJM02_02000|Probable transcriptional regulatory protein (Probably LuxR/UhpA-family)	0	0	0	0	0	0	0	0	0	0	0	0	0	0	0	0	0	0	0	0	0	2	0	0	0	0	0	0	0	0	0	0	0	0	0	0
Rv0389|AJW48044.1|UB21_02030|ARN05079.1|BJM02_02010|Probable phosphoribosylglycinamide formyltransferase 2 PurT (GART 2) (Gar transformylase 2) (5'-phosphoribosylglycinamide transformylase 2) (Formate-dependent gar transformylase)	0	0	0	0	0	0	0	0	0	0	0	0	0	0	0	0	0	0	0	0	0	0	0	2	0	0	0	0	0	0	0	0	0	0	0	0
Rv0390|AJW48045.1|UB21_02035|ARN05080.1|BJM02_02015|Conserved protein	0	0	0	0	0	0	0	0	0	0	0	0	0	0	0	0	0	0	0	0	0	0	4	0	0	0	0	0	2	0	0	0	0	0	0	0
Rv0391|AJW48046.1|UB21_02040|ARN05081.1|BJM02_02020|O-succinylhomoserine sulfhydrylase (OSH sulfhydrylase) (OSHS sulfhydrylase) (EC 2.5.1.-)	2	0	0	0	0	0	0	0	0	0	0	0	0	0	2	0	0	0	0	0	0	0	0	0	0	2	0	0	0	0	0	0	2	0	0	0
Rv0392c|AJW48047.1|UB21_02045|ARN05082.1|BJM02_02025|Probable membrane NADH dehydrogenase NdhA	0	0	0	0	0	0	0	0	0	0	0	0	0	2	0	0	0	0	0	0	0	0	0	0	0	0	0	0	0	0	0	0	0	0	0	0
Rv0393|AJW48048.1|UB21_02050|ARN05083.1|BJM02_02030|Conserved 13E12 repeat family protein	0	0	0	0	0	0	0	0	0	0	1	0	0	0	0	0	0	0	0	0	0	0	0	0	0	0	0	0	0	0	0	0	0	0	0	0
Rv0394c|AJW48049.1|UB21_02055|ARN05084.1|BJM02_02035|Possible secreted protein	0	0	0	0	0	0	0	0	0	0	0	0	0	0	0	0	0	0	0	0	0	0	0	0	0	0	0	0	0	0	0	0	0	0	0	0
Rv0395|AJW51085.1|UB21_02060|ARN08248.1|BJM02_02040|Uncharacterized protein	0	0	2	0	0	0	0	0	0	0	0	0	0	0	0	0	0	0	0	0	0	0	1	0	0	0	0	0	0	0	0	0	0	0	0	0
Rv0396|AJW48050.1|UB21_02065|ARN05085.1|BJM02_02045|Uncharacterized protein	0	0	0	0	0	0	0	0	0	0	0	0	0	0	0	0	0	0	0	0	0	0	0	0	0	0	0	0	0	0	0	0	0	0	0	0
Rv0397|AJW48051.1|UB21_02070|ARN05086.1|BJM02_02050|Conserved 13E12 repeat family protein	0	0	0	0	0	0	0	0	0	0	0	0	0	0	0	0	0	0	0	0	0	0	0	0	0	0	0	0	0	0	0	0	0	0	0	0
Rv0397A|AJW48052.1|UB21_02075|ARN05087.1|BJM02_02055|Conserved protein	0	0	0	0	1	0	0	0	0	0	0	0	0	0	0	0	0	0	0	0	0	0	1	0	0	0	0	0	0	0	0	0	0	0	0	0
Rv0398c|AJW48053.1|UB21_02080|ARN05088.1|BJM02_02060|Possible secreted protein	0	0	0	0	1	0	0	0	0	0	0	0	0	0	0	0	0	0	0	0	0	0	1	0	0	0	0	2	0	0	0	0	0	0	0	0
Rv0400c|AJW48054.1|UB21_02090|ARN05090.1|BJM02_02070|Acyl-CoA dehydrogenase FadE7	0	0	0	2	0	0	0	0	0	0	0	2	0	2	2	0	0	0	0	0	0	0	0	0	0	0	2	0	3	0	3	2	0	0	0	0
Rv0401|AJW48055.1|UB21_02095|ARN05091.1|BJM02_02075|Probable conserved transmembrane protein	0	0	0	0	0	0	0	0	0	0	0	0	0	0	0	0	0	0	0	0	0	0	2	0	0	0	0	0	0	0	0	0	0	0	0	0
Rv0402c|AJW48056.1|UB21_02100|ARN05092.1|BJM02_02080|Probable transport protein MmpL1	1	0	0	0	2	0	0	0	0	0	0	0	0	1	2	0	0	0	0	0	0	2	0	1	0	0	0	0	0	0	0	0	0	0	0	0
Rv0403c|AJW48057.1|UB21_02105|ARN05093.1|BJM02_02085|Probable transport accessory protein MmpS1	0	0	0	0	0	0	0	0	0	0	0	0	0	0	0	0	0	0	0	0	0	0	0	0	0	0	0	0	0	0	0	0	0	0	0	0
Rv0404|AJW48058.1|UB21_02110|ARN05094.1|BJM02_02090|Long-chain-fatty-acid--AMP ligase FadD30 (FAAL) (EC 6.2.1.-) (Acyl-AMP synthetase)	0	0	0	0	0	0	0	0	0	0	0	0	0	0	0	0	0	0	0	0	0	0	0	0	0	0	0	0	0	0	0	0	0	0	0	0
Rv0406c|AJW51086.1|UB21_02120|ARN08249.1|BJM02_02100|Beta lactamase like protein	0	0	0	0	0	0	0	0	0	0	0	0	0	0	0	0	0	0	0	0	0	0	0	0	0	0	0	0	0	0	0	0	0	0	0	0
Rv0407|AJW48059.1|UB21_02125|ARN05096.1|BJM02_02105|F420-dependent glucose-6-phosphate dehydrogenase (FGD) (FGD1) (G6PD) (EC 1.1.98.2)	0	2	0	0	0	0	0	0	0	0	0	0	0	0	0	0	0	0	0	0	0	0	2	0	2	0	0	0	0	0	0	0	0	0	0	0
Rv0408|AJW48060.1|UB21_02130|ARN05097.1|BJM02_02110|Phosphate acetyltransferase (EC 2.3.1.8) (Phosphotransacetylase)	1	0	0	0	0	0	0	0	0	0	0	0	0	0	0	0	0	0	0	0	2	0	0	0	0	0	0	0	0	0	0	0	0	0	0	0
Rv0409|AJW48061.1|UB21_02135|ARN05098.1|BJM02_02115|Acetate kinase (EC 2.7.2.1) (Acetokinase)	0	0	0	0	0	0	0	0	0	0	0	0	0	0	0	0	0	1	0	0	0	0	0	0	0	0	0	0	0	0	0	0	0	0	0	0
Rv0410c|AJW51087.1|UB21_02140|ARN08250.1|BJM02_02120|Serine/threonine-protein kinase PknG (EC 2.7.11.1)	0	0	0	0	0	0	0	0	0	0	0	0	0	0	0	2	0	1	0	0	0	0	0	0	0	0	2	0	0	0	0	2	0	0	0	0
Rv0411c|AJW48062.1|UB21_02145|ARN05099.1|BJM02_02125|Probable glutamine-binding lipoprotein GlnH (GLNBP)	0	0	0	1	0	0	0	0	0	0	0	0	0	0	0	0	0	0	0	0	0	0	0	0	0	0	0	0	1	0	0	0	0	0	0	0
Rv0412c|AJW48063.1|UB21_02150|ARN05100.1|BJM02_02130|Possible conserved membrane protein	0	0	0	1	0	0	0	0	0	0	0	0	0	0	0	0	0	0	0	0	0	0	0	0	0	0	0	0	0	0	0	0	0	0	0	0
Rv0413|AJW48064.1|UB21_02155|ARN05101.1|BJM02_02135|Putative 8-oxo-dGTP diphosphatase 3 (8-oxo-dGTPase) (EC 3.6.1.55) (7,8-dihydro-8-oxoguanine-triphosphatase 3) (Mutator protein MutT3) (dGTP pyrophosphohydrolase 3)	0	0	2	0	0	0	0	0	1	0	0	0	0	0	0	0	0	0	0	0	0	1	0	0	0	0	0	1	0	0	0	1	2	0	0	0
Rv0414c|AJW48065.1|UB21_02160|ARN05102.1|BJM02_02140|Thiamine-phosphate synthase (TP synthase) (TPS) (EC 2.5.1.3) (Thiamine-phosphate pyrophosphorylase) (TMP pyrophosphorylase) (TMP-PPase)	0	0	0	0	0	0	0	0	0	0	0	0	0	0	0	0	0	0	0	0	0	0	0	0	0	0	0	0	0	0	0	0	0	0	0	0
Rv0415|AJW48066.1|UB21_02165|ARN05103.1|BJM02_02145|Possible thiamine biosynthesis oxidoreductase ThiO	0	0	0	0	0	0	0	0	0	0	0	0	0	0	0	0	0	0	0	0	0	0	0	0	0	0	0	0	0	0	0	0	0	0	0	0
Rv0416|AJW48067.1|UB21_02170|ARN05104.1|BJM02_02150|Possible protein ThiS	0	0	0	0	0	0	0	0	0	0	0	0	0	0	0	0	0	0	0	0	0	0	0	0	0	0	0	0	0	0	0	0	0	0	0	0
Rv0418|AJW48069.1|UB21_02180|ARN05106.1|BJM02_02160|Probable lipoprotein aminopeptidase LpqL (EC 3.4.11.1) (Leucine aminopeptidase) (Lipoprotein LpqL)	0	0	0	0	0	0	0	0	0	0	0	2	0	0	0	0	0	0	0	2	0	0	0	0	0	0	0	2	1	2	0	0	0	0	0	0
Rv0419|AJW48070.1|UB21_02185|ARN05107.1|BJM02_02165|Possible lipoprotein peptidase LpqM	0	0	0	0	0	0	0	0	0	0	4	0	0	0	0	2	0	0	0	0	2	0	0	0	4	0	0	2	1	0	0	0	0	0	0	0
Rv0420c|AJW48071.1|UB21_02190|ARN05108.1|BJM02_02170|Possible transmembrane protein	0	0	0	0	0	0	0	0	0	0	0	0	0	0	0	0	0	0	0	0	0	0	0	0	0	0	0	0	2	0	0	0	0	0	0	0
Rv0421c|AJW48072.1|UB21_02195|ARN05109.1|BJM02_02175|Uncharacterized protein	0	0	0	0	0	0	0	0	0	0	0	0	0	0	0	0	0	0	0	0	0	0	0	0	0	0	0	0	0	0	0	0	0	0	0	0
Rv0422c|AJW48073.1|UB21_02200|ARN05110.1|BJM02_02180|Hydroxymethylpyrimidine/phosphomethylpyrimidine kinase (EC 2.7.1.49) (EC 2.7.4.7) (Hydroxymethylpyrimidine kinase) (HMP kinase) (Hydroxymethylpyrimidine phosphate kinase) (HMP-P kinase) (HMP-phosphate kinase) (HMPP kinase)	0	0	0	0	0	0	0	0	0	0	0	0	0	0	0	0	0	0	0	2	0	0	0	0	0	0	0	0	0	0	0	0	0	0	0	0
Rv0423c|AJW48074.1|UB21_02205|ARN08251.1|BJM02_02185|Phosphomethylpyrimidine synthase (EC 4.1.99.17) (Hydroxymethylpyrimidine phosphate synthase) (HMP-P synthase) (HMP-phosphate synthase) (HMPP synthase) (Thiamine biosynthesis protein ThiC)	2	0	0	0	0	0	0	0	0	2	0	0	0	0	2	0	0	0	0	0	0	0	2	0	0	0	0	0	0	2	0	0	0	0	0	2
Rv0424c|AJW48075.1|UB21_02210|ARN05111.1|BJM02_02190|Uncharacterized protein	0	0	0	0	0	0	0	0	0	0	0	0	0	0	0	0	0	0	0	0	0	0	0	0	0	0	0	0	0	0	0	0	0	0	0	0
Rv0425c|AJW48076.1|UB21_02215|ARN05112.1|BJM02_02195|Possible metal cation transporting P-type ATPase CtpH	2	0	0	0	0	0	0	0	0	0	2	0	2	0	2	2	2	0	0	0	2	0	0	2	2	0	4	0	0	0	2	2	2	0	0	0
Rv0426c|AJW48077.1|UB21_02220|ARN05113.1|BJM02_02200|Possible transmembrane protein	0	0	0	0	0	0	0	0	0	0	0	0	0	0	0	0	0	0	0	0	0	0	0	0	0	0	0	0	0	0	2	0	0	2	0	0
Rv0427c|AJW51088.1|UB21_02225|ARN08252.1|BJM02_02205|Exodeoxyribonuclease III (EC 3.1.11.2)	0	0	0	0	0	0	0	0	2	0	0	0	0	0	0	0	0	0	0	0	0	0	0	0	0	0	0	0	0	0	0	0	0	0	0	0
Rv0428c|AJW48078.1|UB21_02230|ARN05114.1|BJM02_02210|GCN5-related N-acetyltransferase	0	0	0	0	0	0	0	0	0	0	0	0	0	0	0	3	0	0	0	0	0	0	0	0	0	0	0	0	0	0	0	0	0	0	0	0
Rv0429c|AJW48079.1|UB21_02235|ARN05115.1|BJM02_02215|Peptide deformylase (PDF) (EC 3.5.1.88) (Polypeptide deformylase)	0	0	0	0	0	0	0	0	0	0	0	0	0	0	0	1	0	0	0	0	0	0	0	0	0	0	0	0	0	0	0	0	0	0	0	0
Rv0430|AJW48080.1|UB21_02240|ARN05116.1|BJM02_02220|Uncharacterized protein	0	0	0	0	0	0	0	0	0	0	0	0	0	0	0	2	0	0	0	0	0	0	0	0	0	0	0	0	0	0	2	0	0	0	0	0
Rv0431|AJW48081.1|UB21_02245|ARN05117.1|BJM02_02225|Putative tuberculin related peptide	0	0	0	0	0	0	0	0	0	0	0	0	0	0	0	0	0	0	0	0	0	0	0	0	0	0	0	0	0	0	0	0	0	0	0	0
Rv0432|AJW48082.1|UB21_02250|ARN05118.1|BJM02_02230|Superoxide dismutase [Cu-Zn] (EC 1.15.1.1)	0	0	0	0	0	0	0	2	0	2	0	0	0	0	0	0	0	0	2	0	0	2	0	0	2	0	0	0	0	0	2	0	0	0	0	0
Rv0433|AJW51089.1|UB21_02255|ARN08253.1|BJM02_02235|Putative glutamate--cysteine ligase 2 (EC 6.3.2.2) (Gamma-glutamylcysteine synthetase 2) (GCS 2) (Gamma-GCS 2)	0	0	0	0	0	0	0	0	0	0	0	0	0	0	0	0	0	0	1	0	0	0	0	0	0	0	0	0	0	0	0	0	0	2	0	0
Rv0434|AJW48083.1|UB21_02260|ARN05119.1|BJM02_02240|Lon N-terminal domain-containing protein	0	0	0	0	0	0	0	0	0	0	0	0	0	0	0	0	0	0	0	0	0	0	0	0	0	0	0	0	0	0	0	0	0	0	0	0
Rv0435c|AJW48085.1|UB21_02270|ARN05120.1|BJM02_02245|Putative conserved ATPase	0	0	1	0	0	2	0	0	0	0	0	0	0	0	0	0	0	0	0	0	0	0	0	0	0	0	0	0	0	0	0	0	0	0	0	0
Rv0436c|AJW51090.1|UB21_02275|ARN08254.1|BJM02_02250|CDP-diacylglycerol--serine O-phosphatidyltransferase (EC 2.7.8.8) (Phosphatidylserine synthase)	0	0	0	0	0	0	0	0	0	0	2	0	0	0	0	0	0	0	0	0	0	0	0	0	0	0	0	0	0	0	0	0	0	0	0	0
Rv0437c|AJW48086.1|UB21_02280|ARN05121.1|BJM02_02255|Phosphatidylserine decarboxylase proenzyme (EC 4.1.1.65) [Cleaved into: Phosphatidylserine decarboxylase alpha chain; Phosphatidylserine decarboxylase beta chain]	0	0	0	0	0	0	0	0	0	0	0	0	0	0	0	0	0	0	0	0	0	0	0	0	0	0	0	0	0	0	0	0	0	0	0	0
Rv0438c|AJW48087.1|UB21_02285|ARN05122.1|BJM02_02260|Molybdopterin molybdenumtransferase 2 (MPT Mo-transferase 2) (EC 2.10.1.1)	0	0	0	0	0	0	0	0	0	0	0	0	0	0	0	0	0	0	0	0	0	0	0	0	0	0	0	0	0	0	0	0	0	0	0	0
Rv0439c|AJW48088.1|UB21_02290|ARN05123.1|BJM02_02265|Probable dehydrogenase/reductase	0	0	0	0	0	0	0	0	0	0	0	0	0	0	0	0	0	0	0	0	0	0	0	0	0	0	0	0	0	0	0	0	0	0	0	0
Rv0441c|AJW48090.1|UB21_02300|ARN05125.1|BJM02_02275|Uncharacterized protein Rv0441c	0	0	0	0	0	0	0	0	0	0	0	1	0	0	0	0	0	0	0	0	0	0	0	0	0	0	0	0	0	0	0	0	0	0	0	0
Rv0442c|AJW48091.1|UB21_02305|ARN05126.1|BJM02_02280|PPE family protein PPE10	0	0	0	0	0	0	0	0	0	0	0	0	0	0	2	0	0	0	0	0	0	0	0	0	0	0	0	0	0	0	0	2	0	0	0	0
Rv0443|AJW48092.1|UB21_02310|ARN05127.1|BJM02_02285|Conserved protein	0	0	0	0	0	0	0	0	0	0	0	0	2	2	0	0	0	0	0	1	0	0	0	0	0	0	0	0	0	0	0	0	0	0	0	0
Rv0444c|AJW48093.1|UB21_02315|ARN05128.1|BJM02_02290|Anti-sigma-K factor RskA (Regulator of SigK) (Sigma-K anti-sigma factor RskA)	0	0	0	0	0	0	0	0	0	0	0	0	0	0	0	0	0	0	0	0	0	0	0	0	0	0	0	0	0	0	0	0	0	0	0	0
Rv0445c|AJW48094.1|UB21_02320|ARN05129.1|BJM02_02295|ECF RNA polymerase sigma factor SigK (ECF sigma factor SigK) (Alternative RNA polymerase sigma factor SigK) (RNA polymerase sigma-K factor) (Sigma-K factor)	0	0	0	0	0	0	0	0	2	0	0	0	0	0	0	0	0	0	0	0	0	0	0	0	0	0	0	0	0	0	0	0	0	0	0	0
Rv0446c|AJW48095.1|UB21_02325|ARN05130.1|BJM02_02300|Possible conserved transmembrane protein	0	0	0	0	0	0	0	0	0	0	0	0	0	0	0	0	0	0	0	0	0	0	0	0	0	0	0	0	0	0	0	0	0	0	0	0
Rv0447c|AJW48096.1|UB21_02330|ARN05131.1|BJM02_02305|Tuberculostearic acid methyltransferase UfaA1 (TSA methyltransferase) (EC 2.1.1.-)	0	0	0	0	0	0	0	0	0	0	0	0	0	0	0	0	0	0	0	0	0	0	0	0	0	0	0	0	0	0	0	0	0	0	0	0
Rv0448c|AJW48097.1|UB21_02335|ARN05132.1|BJM02_02310|Uncharacterized protein	0	0	0	0	0	0	0	0	0	0	0	0	0	0	0	0	0	0	0	0	0	0	0	0	0	0	0	0	0	0	0	0	0	0	0	0
Rv0449c|AJW48098.1|UB21_02340|ARN05133.1|BJM02_02315|Amino_oxidase domain-containing protein	0	0	0	0	0	0	0	0	0	0	0	0	0	0	0	0	0	0	0	0	0	0	0	0	0	0	2	0	0	0	0	0	0	0	0	0
Rv0450c|AJW48099.1|UB21_02345|ARN05134.1|BJM02_02320|Siderophore exporter MmpL4	3	0	1	0	0	0	0	0	0	0	1	0	0	0	0	0	0	1	2	0	2	2	0	0	0	2	0	0	2	0	2	2	0	0	0	0
Rv0451c|AJW48100.1|UB21_02350|ARN05135.1|BJM02_02325|Siderophore export accessory protein MmpS4 (PGB14T-X)	0	0	0	0	0	0	0	0	0	0	1	0	0	0	0	0	0	0	0	0	0	0	0	0	0	0	0	0	1	1	0	0	0	2	0	0
Rv0452|AJW48101.1|UB21_02355|ARN05136.1|BJM02_02330|Possible transcriptional regulatory protein	0	2	0	0	2	0	0	0	0	0	0	0	0	0	0	0	2	0	0	0	0	0	0	0	0	0	0	2	0	0	0	2	0	1	0	0
Rv0453|AJW48102.1|UB21_02360|ARN05137.1|BJM02_02335|PPE family protein PPE11	0	0	0	0	0	0	0	0	0	0	0	0	1	0	0	0	0	0	0	0	0	0	0	2	0	0	0	0	2	0	0	0	0	0	0	0
Rv0455c|AJW48104.1|UB21_02370|ARN05139.1|BJM02_02345|Conserved protein	0	0	0	1	0	0	0	0	0	0	0	0	0	0	0	0	0	0	0	0	0	2	0	0	2	0	0	0	0	0	0	0	0	2	0	0
Rv0456A|AJW48106.1|UB21_02380|ARN05141.1|BJM02_02355|Probable endoribonuclease MazF1 (EC 3.1.-.-) (Probable toxin MazF1)	0	0	0	0	0	0	0	0	0	0	0	0	0	0	0	0	0	0	0	0	0	0	0	0	0	0	0	0	0	0	0	0	0	0	0	0
Rv0456B|AJW51091.1|UB21_02385|ARN08255.1|BJM02_02360|Probable antitoxin MazE1	0	0	0	0	0	0	0	0	0	0	0	0	0	0	0	0	0	0	0	0	0	0	0	0	0	0	0	0	0	0	0	0	0	0	0	0
Rv0456c|AJW48105.1|UB21_02375|ARN05140.1|BJM02_02350|Enoyl-CoA hydratase EchA2 (Enoyl hydrase) (Unsaturated acyl-CoA hydratase) (Crotonase)	0	0	0	1	0	0	0	0	0	0	0	0	0	0	0	0	2	0	0	0	0	0	0	0	0	1	0	0	0	0	0	0	0	0	0	0
Rv0457c|AJW48107.1|UB21_02390|ARN05142.1|BJM02_02365|Probable peptidase	11	6	8	4	2	2	2	1	1	2	0	5	1	0	0	0	6	2	6	4	2	2	2	3	7	7	8	7	2	0	0	1	0	0	0	0
Rv0458|AJW48108.1|UB21_02395|ARN05143.1|BJM02_02370|Probable aldehyde dehydrogenase (EC 1.2.1.3)	2	2	0	1	0	0	0	0	0	0	0	1	2	0	0	0	2	0	0	0	0	0	0	0	0	0	0	2	0	0	0	0	0	0	0	0
Rv0459|AJW48109.1|UB21_02400|ARN05144.1|BJM02_02375|Uncharacterized protein	0	0	0	0	0	0	0	0	0	0	0	0	0	0	0	0	0	0	0	0	0	0	0	0	0	0	0	0	0	0	0	0	0	0	0	0
Rv0460|AJW48110.1|UB21_02405|ARN08256.1|BJM02_02380|Conserved hydrophobic protein	0	0	0	0	0	0	0	0	0	0	0	0	0	0	0	0	0	0	0	0	0	0	0	1	0	0	0	0	0	0	0	0	0	0	0	0
Rv0461|AJW48111.1|UB21_02410|ARN05145.1|BJM02_02385|Probable transmembrane protein	0	0	0	0	0	0	0	0	0	0	0	0	1	0	0	0	0	0	0	0	0	0	0	1	0	0	0	0	0	0	0	0	0	0	0	0
Rv0462|AJW48112.1|UB21_02415|ARN05146.1|BJM02_02390|Dihydrolipoyl dehydrogenase (LPD) (EC 1.8.1.4) (Component of peroxynitrite reductase/peroxidase complex) (Component of PNR/P) (Dihydrolipoamide dehydrogenase) (E3 component of alpha-ketoacid dehydrogenase complexes)	0	0	0	0	0	0	0	0	0	0	0	0	2	2	0	0	0	0	0	0	2	4	0	0	0	0	0	0	0	0	0	0	0	0	0	0
Rv0463|AJW48113.1|UB21_02420|ARN05147.1|BJM02_02395|Probable conserved membrane protein	0	0	0	0	0	0	0	0	0	0	0	0	0	0	0	0	0	0	0	0	0	0	0	0	0	0	0	0	0	0	0	0	0	0	0	0
Rv0464c|AJW48114.1|UB21_02425|ARN05148.1|BJM02_02400|Conserved protein	0	0	0	0	0	0	0	0	0	0	0	0	0	0	0	0	0	0	0	0	0	1	0	0	0	0	0	0	0	0	0	0	0	0	0	0
Rv0465c|AJW48115.1|UB21_02430|ARN05149.1|BJM02_02405|HTH-type transcriptional regulator RamB (icl1 and ramB operon repressor protein)	0	0	0	0	0	0	0	0	0	0	0	0	2	0	0	0	0	0	0	0	0	0	0	0	0	0	0	0	0	0	0	0	0	0	0	0
Rv0466|AJW48116.1|UB21_02435|ARN05150.1|BJM02_02410|Conserved protein	2	0	0	0	0	0	0	0	0	0	0	0	0	0	0	0	0	0	0	0	0	0	4	2	0	0	0	0	0	0	0	0	0	0	0	0
Rv0467|AJW48117.1|UB21_02440|ARN05151.1|BJM02_02415|Isocitrate lyase (ICL) (EC 4.1.3.1) (Isocitrase) (Isocitratase)	1	2	2	0	2	2	0	0	2	0	3	2	12	12	6	16	13	8	9	14	12	8	10	10	4	16	18	13	7	8	13	10	6	18	16	8
Rv0468|AJW48118.1|UB21_02445|ARN05152.1|BJM02_02420|3-hydroxybutyryl-CoA dehydrogenase (EC 1.1.1.157) (Beta-hydroxybutyryl-CoA dehydrogenase) (BHBD)	0	2	2	0	0	0	0	0	0	0	0	1	4	0	0	2	1	0	5	4	0	0	0	0	2	0	4	6	5	0	2	0	2	0	4	0
Rv0469|AJW48119.1|UB21_02450|ARN05153.1|BJM02_02425|S-adenosylmethionine-dependent methyltransferase UmaA (SAM-dependent methyltransferase UmaA) (EC 2.1.1.-)	0	0	2	0	0	0	0	0	0	0	0	0	0	0	2	0	0	0	0	0	0	0	0	0	2	0	0	0	0	2	0	2	0	0	0	0
Rv0470A|AJW48121.1|UB21_02460|ARN05155.1|BJM02_02435|Uncharacterized protein	0	0	0	0	0	0	0	0	0	0	0	0	0	0	0	0	0	0	0	0	0	0	0	0	0	0	0	0	0	0	0	0	0	0	1	0
Rv0470c|AJW48120.1|UB21_02455|ARN05154.1|BJM02_02430|Cyclopropane mycolic acid synthase 3 (CMAS) (EC 2.1.1.79) (Cyclopropane-fatty-acyl-phospholipid synthase) (CFA synthase) (Cyclopropane fatty acid synthase) (Mycolic acid methyltransferase) (MA-MT) (S-adenosylmethionine-dependent methyltransferase) (AdoMet-MT) (SAM-MT)	2	0	2	0	0	0	0	0	0	0	0	2	0	0	0	0	0	0	0	0	0	0	4	0	0	0	0	2	0	0	2	0	0	0	0	0
Rv0471c|AJW48122.1|UB21_02465|ARN05156.1|BJM02_02440|Uncharacterized protein	0	0	0	0	0	0	0	0	0	0	0	2	0	0	0	0	0	0	0	0	0	0	0	0	0	0	0	0	0	0	0	0	0	0	0	0
Rv0472c|AJW48123.1|UB21_02470|ARN05157.1|BJM02_02445|Uncharacterized HTH-type transcriptional regulator Rv0472c	0	0	0	0	0	0	0	0	0	0	0	0	0	0	0	0	0	0	0	0	2	0	0	0	0	0	0	0	0	0	0	0	0	0	2	0
Rv0473|AJW51092.1|UB21_02475|ARN08257.1|BJM02_02450|Possible conserved transmembrane protein	1	0	3	4	0	0	1	0	3	1	5	1	1	0	0	1	2	3	1	1	2	1	1	0	4	1	2	3	0	4	0	3	0	1	0	0
Rv0474|AJW48124.1|UB21_02480|ARN05158.1|BJM02_02455|Uncharacterized HTH-type transcriptional regulator Rv0474	0	0	0	0	0	2	0	0	0	0	0	0	0	0	0	0	0	0	0	0	0	0	0	0	0	0	0	0	0	0	0	0	0	0	0	0
Rv0475|AJW48125.1|UB21_02485|ARN05159.1|BJM02_02460|Heparin-binding hemagglutinin (Adhesin)	0	0	0	0	0	0	0	0	0	0	2	0	0	0	0	0	2	0	2	0	2	0	0	0	0	0	1	0	0	0	0	0	0	4	0	0
Rv0476|AJW48126.1|UB21_02490|ARN08258.1|BJM02_02465|Uncharacterized protein Rv0476	0	2	0	0	0	0	0	0	1	0	0	0	0	0	0	0	0	0	0	0	0	0	0	0	0	0	0	0	0	0	1	1	0	0	0	0
Rv0477|AJW48127.1|UB21_02495|ARN05160.1|BJM02_02470|Uncharacterized protein Rv0477	0	0	0	1	0	0	0	0	1	0	0	0	0	0	0	0	0	0	0	0	0	0	0	0	0	0	0	0	0	0	0	1	0	0	0	0
Rv0478|AJW48128.1|UB21_02500|ARN05161.1|BJM02_02475|Deoxyribose-phosphate aldolase (DERA) (EC 4.1.2.4) (2-deoxy-D-ribose 5-phosphate aldolase) (Phosphodeoxyriboaldolase) (Deoxyriboaldolase)	0	0	0	0	0	0	0	0	0	0	0	0	0	0	0	0	0	0	0	0	0	0	0	0	0	0	0	0	2	0	0	0	0	0	0	0
Rv0479c|AJW48129.1|UB21_02505|ARN05162.1|BJM02_02480|Uncharacterized protein Rv0479c	0	0	0	2	0	0	0	0	0	2	0	0	0	0	2	2	0	0	0	0	0	2	0	0	0	0	2	0	0	0	0	0	2	0	0	4
Rv0480c|AJW48130.1|UB21_02510|ARN05163.1|BJM02_02485|Hydrolase Rv0480c (EC 3.5.-.-)	0	0	0	0	0	0	0	0	0	0	0	0	0	0	0	0	0	0	0	0	0	0	0	0	0	0	0	0	0	0	0	2	0	0	0	0
Rv0481c|AJW48131.1|UB21_02515|ARN05164.1|BJM02_02490|Uncharacterized protein Rv0481c	0	0	0	0	0	0	0	0	0	0	0	0	0	0	0	0	0	0	0	0	0	0	0	0	0	0	0	0	0	0	0	0	0	0	0	0
Rv0483|AJW51093.1|UB21_02525|ARN05166.1|BJM02_02500|L,D-transpeptidase 5 (LDT 5) (EC 2.3.2.-) (Ldt(Mt5))	0	2	4	0	0	0	0	0	0	0	0	0	2	2	4	0	0	0	0	0	0	0	0	0	5	0	0	0	0	0	0	0	0	0	0	0
Rv0484c|AJW48133.1|UB21_02530|ARN05167.1|BJM02_02505|Uncharacterized oxidoreductase Rv0484c (EC 1.-.-.-)	0	0	0	0	0	0	0	0	0	0	0	0	0	0	0	0	0	0	0	1	0	0	0	0	0	0	0	0	0	0	0	0	1	0	0	0
Rv0485|AJW48134.1|UB21_02535|ARN05168.1|BJM02_02510|Transcriptional regulator Rv0485	1	0	0	0	0	0	0	0	0	0	0	0	0	3	0	0	0	0	0	2	0	0	0	0	4	3	1	4	0	0	0	0	1	0	0	1
Rv0486|AJW51094.1|UB21_02540|ARN08259.1|BJM02_02515|D-inositol 3-phosphate glycosyltransferase (EC 2.4.1.250) (N-acetylglucosamine-inositol-phosphate N-acetylglucosaminyltransferase) (GlcNAc-Ins-P N-acetylglucosaminyltransferase)	0	0	2	0	0	0	0	0	0	0	0	0	0	0	0	0	0	0	0	0	0	0	0	0	1	0	0	0	0	0	0	0	0	0	1	0
Rv0487|AJW48135.1|UB21_02545|ARN05169.1|BJM02_02520|Uncharacterized protein Rv0487	0	0	0	0	0	0	0	0	0	0	0	0	0	0	0	0	0	0	0	0	0	0	0	0	2	0	2	0	0	0	0	0	0	0	2	0
Rv0488|AJW51095.1|UB21_02550|ARN08260.1|BJM02_02525|Putative amino-acid transporter Rv0488	0	0	0	0	0	0	0	0	0	0	0	0	0	0	2	0	0	0	0	0	0	0	0	0	0	0	0	0	2	0	0	0	0	0	0	0
Rv0491|AJW51096.1|UB21_02565|ARN08262.1|BJM02_02540|Sensory transduction protein RegX3	0	0	0	1	0	0	0	0	0	0	0	0	0	0	0	2	0	0	2	0	0	0	1	2	0	0	0	4	2	0	0	0	0	0	1	0
Rv0492A|AJW48138.1|UB21_02575|ARN05172.1|BJM02_02550|Uncharacterized protein	0	0	0	0	0	0	0	0	0	0	0	0	0	0	0	0	0	0	0	0	0	0	0	0	0	0	0	0	0	0	0	0	0	0	0	0
Rv0492c|AJW48137.1|UB21_02570|ARN05171.1|BJM02_02545|Uncharacterized GMC-type oxidoreductase Rv0492c (EC 1.1.-.-)	0	0	0	0	0	2	0	0	0	0	0	0	0	0	0	0	0	0	0	0	0	0	0	0	0	0	0	0	0	0	0	0	0	0	0	0
Rv0493c|AJW48139.1|UB21_02580|ARN05173.1|BJM02_02555|Uncharacterized protein Rv0493c	0	0	0	0	0	0	0	0	0	0	0	0	0	0	0	0	2	0	0	1	1	0	0	0	0	0	0	0	1	0	0	0	0	0	0	1
Rv0494|AJW48140.1|UB21_02585|ARN05174.1|BJM02_02560|Uncharacterized HTH-type transcriptional regulator Rv0494	0	0	0	0	0	0	0	0	0	0	0	0	0	0	0	0	0	0	0	0	0	0	0	0	0	0	0	0	0	0	0	0	0	0	0	0
Rv0495c|AJW51097.1|UB21_02590|ARN08263.1|BJM02_02565|Uncharacterized protein Rv0495c	0	0	0	0	0	0	0	0	0	0	0	0	0	0	0	0	0	0	0	0	0	0	0	0	0	0	0	0	0	0	0	0	0	0	0	0
Rv0496|AJW48141.1|UB21_02595|ARN05175.1|BJM02_02570|Exopolyphosphatase 1 (ExopolyPase 1) (EC 3.6.1.11) (MTB-PPX1)	0	0	0	0	2	0	0	0	0	0	0	0	0	0	0	0	0	0	0	0	0	0	0	0	0	0	0	0	0	1	0	0	0	0	0	0
Rv0498|AJW48142.1|UB21_02605|ARN05177.1|BJM02_02580|Uncharacterized protein Rv0498	0	0	0	0	0	0	0	0	0	0	0	0	0	0	0	0	2	0	0	0	0	0	0	0	0	0	0	0	0	0	0	0	0	0	0	0
Rv0500|AJW48143.1|UB21_02615|ARN05179.1|BJM02_02590|Pyrroline-5-carboxylate reductase (P5C reductase) (P5CR) (EC 1.5.1.2) (PCA reductase)	0	2	0	0	0	2	0	0	0	0	0	0	0	0	0	2	0	0	0	0	0	0	0	0	0	0	0	0	0	0	0	0	0	0	2	0
Rv0500A|AJW48144.1|UB21_02620|ARN05180.1|BJM02_02595|Putative DNA-binding protein Rv0500A	0	0	0	0	0	0	0	0	0	0	3	0	0	0	0	0	0	0	0	0	0	0	0	0	0	0	2	0	0	0	0	0	0	0	0	0
Rv0500B|AJW48145.1|UB21_02625|ARN05181.1|BJM02_02600|Uncharacterized protein Rv0500B	0	2	0	0	0	0	0	0	0	0	1	0	0	0	0	0	0	0	0	0	0	0	0	0	0	0	0	0	0	0	0	0	0	0	0	0
Rv0501|AJW48146.1|UB21_02630|ARN05182.1|BJM02_02605|Uncharacterized protein Rv0501	0	0	0	0	0	0	0	0	1	0	0	0	0	0	0	0	0	0	0	0	0	0	0	0	0	2	0	0	0	0	0	1	0	0	0	0
Rv0502|AJW48147.1|UB21_02635|ARN05183.1|BJM02_02610|Uncharacterized protein Rv0502	0	0	0	0	0	0	0	0	0	0	0	2	0	0	0	0	2	0	0	0	0	0	2	0	0	0	2	0	0	0	0	0	0	0	0	0
Rv0503c|AJW48148.1|UB21_02640|ARN05184.1|BJM02_02615|Cyclopropane mycolic acid synthase 2 (CMAS) (EC 2.1.1.79) (Cyclopropane-fatty-acyl-phospholipid synthase) (CFA synthase) (Cyclopropane fatty acid synthase) (Mycolic acid methyltransferase) (MA-MT) (S-adenosylmethionine-dependent methyltransferase) (AdoMet-MT) (SAM-MT)	0	2	0	0	0	0	0	0	0	0	0	0	0	0	0	0	0	0	0	0	0	2	2	0	2	0	0	0	0	0	0	0	0	0	0	2
Rv0504c|AJW48149.1|UB21_02645|ARN05185.1|BJM02_02620|UPF0336 protein Rv0504c	0	0	0	0	0	0	0	0	0	0	0	0	0	0	0	0	0	0	0	0	0	0	0	0	0	0	0	0	0	0	0	0	0	0	0	0
Rv0505c|AJW51098.1|UB21_02650|ARN08264.1|BJM02_02625|Phosphoserine phosphatase SerB1 (PSP) (PSPase) (EC 3.1.3.3) (O-phosphoserine phosphohydrolase)	0	0	0	0	0	0	0	0	0	0	0	0	0	0	0	0	0	0	0	0	1	0	0	0	0	0	0	0	0	0	0	0	0	0	0	0
Rv0506|AJW48150.1|UB21_02655|ARN05186.1|BJM02_02630|Probable transport accessory protein MmpS2	0	0	0	0	0	0	0	0	0	0	0	0	0	0	0	0	0	0	0	0	0	0	0	0	0	0	0	0	0	0	0	0	0	0	0	0
Rv0507|AJW51099.1|UB21_02660|ARN05187.1|BJM02_02635|Probable transport protein MmpL2	0	0	0	0	0	0	0	0	0	0	0	0	0	0	0	0	0	0	0	0	0	0	0	0	0	0	2	0	0	0	0	0	0	0	0	0
Rv0508|AJW48151.1|UB21_02665|ARN05188.1|BJM02_02640|Uncharacterized protein Rv0508	0	0	0	0	0	0	0	0	0	0	0	0	0	0	0	0	0	0	0	0	0	0	0	0	0	0	0	0	0	0	0	0	0	0	0	0
Rv0509|AJW48152.1|UB21_02670|ARN05189.1|BJM02_02645|Glutamyl-tRNA reductase (GluTR) (EC 1.2.1.70)	19265	16182	17994	18087	16669	16041	18028	16354	104092	88765	99254	101548	65772	62971	71172	65243	27197	23148	26085	26487	60871	52153	58592	59450	35634	29933	33493	34144	56733	48198	53892	54864	67605	57004	64031	65213
Rv0510|AJW48153.1|UB21_02675|ARN05190.1|BJM02_02650|Porphobilinogen deaminase (PBG) (EC 2.5.1.61) (Hydroxymethylbilane synthase) (HMBS) (Pre-uroporphyrinogen synthase)	0	0	0	0	0	0	0	0	0	0	0	0	0	2	0	0	0	2	1	0	2	0	0	2	0	2	0	0	0	0	0	0	0	0	2	0
Rv0511|AJW51100.1|UB21_02680|ARN08265.1|BJM02_02655|Probable uroporphyrin-III C-methyltransferase HemD (Uroporphyrinogen III methylase) (Urogen III methylase) (SUMT) (Urogen III methylase) (UROM)	0	0	0	0	0	0	0	0	0	0	0	0	0	0	0	0	0	0	2	0	0	0	0	0	0	0	0	0	0	0	0	0	4	0	0	0
Rv0513|AJW48154.1|UB21_02690|ARN05191.1|BJM02_02665|Possible conserved transmembrane protein	2	0	0	0	0	0	0	0	0	0	0	0	0	0	0	0	0	0	0	0	0	0	0	0	0	0	0	0	0	0	0	0	0	0	2	0
Rv0514|AJW48155.1|UB21_02695|ARN05192.1|BJM02_02670|Possible transmembrane protein	0	0	0	0	0	0	0	0	0	0	0	0	0	0	0	0	0	0	0	0	0	0	0	0	0	0	0	0	0	0	0	0	0	0	0	0
Rv0516c|AJW48156.1|UB21_02705|ARN05193.1|BJM02_02680|Osmosensory protein A (Putative SigF antagonist) (Putative anti-anti-sigma factor Rv0516c)	0	0	0	0	0	0	0	0	0	0	0	0	0	2	0	0	0	0	2	0	0	0	0	0	0	0	0	0	0	0	0	4	0	2	0	2
Rv0517|AJW48157.1|UB21_02710|ARN05194.1|BJM02_02685|Possible membrane acyltransferase	0	0	0	0	0	0	0	0	0	0	0	0	0	0	0	0	0	0	0	0	0	0	0	0	0	0	0	0	0	0	0	0	0	0	0	0
Rv0518|AJW48158.1|UB21_02715|ARN05195.1|BJM02_02690|GDSL lipase Rv0518 (EC 3.1.1.-)	1	0	0	0	0	0	0	1	0	0	0	0	0	0	2	0	0	0	0	1	0	1	0	0	0	0	0	1	0	0	1	0	0	0	0	0
Rv0519c|AJW48159.1|UB21_02720|ARN05196.1|BJM02_02695|Acyl-CoA:diacylglycerol acyltransferase (EC 2.3.1.122) (EC 2.3.1.20)	0	0	0	0	0	0	0	0	0	0	0	2	0	0	0	4	0	0	0	0	0	0	0	0	0	0	0	0	0	0	0	0	0	0	0	0
Rv0520|AJW48160.1|UB21_02725|ARN05197.1|BJM02_02700|Possible methyltransferase/methylase	0	0	0	0	0	0	0	0	0	0	0	0	0	0	0	0	0	0	0	0	0	0	0	0	0	0	0	0	0	0	0	0	0	0	0	0
Rv0521|AJW48161.1|UB21_02730|ARN05198.1|BJM02_02705|Possible methyltransferase/methylase	0	0	0	0	0	0	0	0	0	0	0	0	0	0	0	0	0	0	0	0	0	0	0	0	0	0	0	0	0	0	0	0	0	0	0	0
Rv0522|AJW48162.1|UB21_02735|ARN05199.1|BJM02_02710|Probable GABA permease GabP (4-amino butyrate transport carrier) (GAMA-aminobutyrate permease)	0	0	0	0	0	0	0	0	0	0	1	0	0	0	0	0	0	0	1	0	0	2	0	0	0	0	0	0	0	0	0	0	0	0	0	0
Rv0523c|AJW51102.1|UB21_02740|ARN08268.1|BJM02_02715|Conserved protein	0	0	0	1	0	0	0	0	0	0	0	0	0	0	0	0	0	0	0	0	0	0	0	0	0	0	0	0	0	0	0	0	0	0	0	0
Rv0524|AJW48163.1|UB21_02745|ARN05200.1|BJM02_02720|Glutamate-1-semialdehyde 2,1-aminomutase (GSA) (EC 5.4.3.8) (Glutamate-1-semialdehyde aminotransferase) (GSA-AT)	0	0	0	0	0	0	0	0	0	2	0	0	0	0	0	0	0	0	0	2	0	0	0	0	2	0	0	0	0	0	0	0	0	0	0	0
Rv0525|AJW48164.1|UB21_02750|ARN05201.1|BJM02_02725|Uncharacterized protein Rv0525	0	0	0	1	1	0	0	0	0	0	0	0	0	0	0	0	0	0	0	0	0	0	0	0	0	0	1	0	0	0	0	0	0	0	0	0
Rv0527|AJW51103.1|UB21_02760|ARN05203.1|BJM02_02735|Possible cytochrome C-type biogenesis protein CcdA	0	0	0	0	0	0	0	0	0	0	0	0	0	0	1	0	0	0	0	0	0	0	0	0	0	0	0	0	0	0	0	0	0	0	0	0
Rv0528|AJW51104.1|UB21_02765|ARN08269.1|BJM02_02740|Probable conserved transmembrane protein	0	0	0	0	0	0	0	0	0	0	0	0	0	0	0	0	0	0	0	0	0	0	0	0	0	0	0	2	0	0	0	0	0	0	0	0
Rv0529|AJW48165.1|UB21_02770|ARN05204.1|BJM02_02745|Possible cytochrome C-type biogenesis protein CcsA	1	0	0	0	0	0	0	0	0	0	0	0	2	0	0	0	0	0	0	0	0	0	0	0	0	0	0	0	0	0	0	0	0	2	0	0
Rv0530|AJW48166.1|UB21_02775|ARN05205.1|BJM02_02750|Conserved protein	2	1	0	0	0	0	0	0	2	0	0	0	0	0	0	0	0	0	0	0	0	0	2	0	3	0	0	0	0	0	0	0	0	0	0	0
Rv0530A|AJW48167.1|UB21_02780|ARN05206.1|BJM02_02755|Conserved protein	0	0	0	0	0	0	0	0	0	1	0	0	0	0	0	0	0	0	0	0	0	0	0	0	0	0	0	0	0	0	0	0	0	0	0	0
Rv0531|AJW48168.1|UB21_02785|ARN05207.1|BJM02_02760|Possible conserved membrane protein	0	0	0	0	0	0	0	0	0	0	0	0	0	0	0	0	0	0	0	0	0	0	0	0	0	0	0	0	0	0	0	0	0	0	0	0
Rv0533c|AJW48169.1|UB21_02795|ARN05208.1|BJM02_02770|3-oxoacyl-[acyl-carrier-protein] synthase 3 (EC 2.3.1.180) (3-oxoacyl-[acyl-carrier-protein] synthase III) (Beta-ketoacyl-ACP synthase III) (KAS III) (MtFabH)	0	0	0	0	0	0	0	0	0	0	0	0	0	0	0	0	0	0	0	0	0	0	0	0	0	0	0	0	0	0	0	0	0	0	0	0
Rv0534c|AJW48170.1|UB21_02800|ARN05209.1|BJM02_02775|1,4-dihydroxy-2-naphthoate octaprenyltransferase (DHNA-octaprenyltransferase) (EC 2.5.1.74) (Isoprenyl diphosphate:1,4-dihydroxy-2-naphthoate isoprenyltransferase)	0	0	0	0	0	0	0	0	0	0	0	0	0	0	0	0	0	0	0	0	0	0	0	0	0	0	0	0	0	0	0	0	0	0	0	0
Rv0535|AJW48171.1|UB21_02805|ARN05210.1|BJM02_02780|S-methyl-5'-thioadenosine phosphorylase (EC 2.4.2.28) (5'-methylthioadenosine phosphorylase) (MTA phosphorylase) (MTAP)	0	0	0	0	0	0	0	0	0	0	0	0	0	0	0	0	0	0	0	0	0	0	0	0	0	0	0	0	0	0	0	0	0	0	0	0
Rv0536|AJW48172.1|UB21_02810|ARN05211.1|BJM02_02785|Probable UDP-glucose 4-epimerase GalE3 (Galactowaldenase) (UDP-galactose 4-epimerase) (Uridine diphosphate galactose 4-epimerase) (Uridine diphospho-galactose 4-epimerase)	0	0	0	0	0	0	0	0	0	0	0	0	0	0	0	0	0	0	0	0	0	0	0	0	0	0	0	0	0	0	0	0	0	0	0	0
Rv0537c|AJW48173.1|UB21_02815|ARN05212.1|BJM02_02790|Probable integral membrane protein	0	0	0	0	0	0	0	0	0	2	0	0	0	0	0	0	0	0	0	0	0	0	0	0	0	0	0	0	0	0	0	0	0	0	2	0
Rv0538|AJW48174.1|UB21_02820|*|*|Possible conserved membrane protein	0	0	0	0	0	0	0	0	0	0	0	0	0	0	0	0	0	0	2	0	0	0	0	0	0	0	2	0	2	0	0	0	0	0	0	0
Rv0539|AJW48175.1|UB21_02825|ARN05213.1|BJM02_02800|Uncharacterized glycosyltransferase Rv0539 (EC 2.4.-.-)	0	0	0	0	0	0	0	0	2	0	0	0	0	0	0	0	0	0	0	0	0	0	0	0	0	0	0	0	0	0	0	0	0	0	0	0
Rv0540|AJW48176.1|UB21_02830|ARN05214.1|BJM02_02805|Uncharacterized protein	3	2	2	0	0	2	0	0	1	2	0	0	0	0	1	0	0	0	1	0	0	0	0	0	0	0	3	0	0	1	0	0	0	0	0	0
Rv0541c|AJW48177.1|UB21_02835|ARN05215.1|BJM02_02810|Probable conserved integral membrane protein	0	0	0	0	0	0	0	0	0	0	0	0	2	0	0	0	0	0	0	0	0	0	0	0	1	0	0	0	0	0	0	0	0	0	0	0
Rv0542c|AJW48178.1|UB21_02840|ARN05216.1|BJM02_02815|Probable 2-succinylbenzoate--CoA ligase (EC 6.2.1.26) (OSB-CoA synthetase) (o-succinylbenzoyl-CoA synthetase)	0	0	0	0	0	0	0	0	0	0	0	0	0	0	0	0	0	0	0	0	0	0	0	0	0	0	1	1	0	0	0	0	0	0	0	0
Rv0543c|AJW48179.1|UB21_02845|ARN05217.1|BJM02_02820|Conserved protein	0	0	0	0	0	0	0	0	0	0	0	0	0	0	0	0	0	0	0	0	0	0	0	0	0	0	0	1	0	0	0	0	0	0	0	0
Rv0544c|AJW48180.1|UB21_02850|ARN05218.1|BJM02_02825|Possible conserved transmembrane protein	0	0	0	0	0	0	0	0	0	0	0	0	0	0	0	0	0	0	0	0	0	0	0	0	0	0	0	0	0	0	0	0	0	0	0	0
Rv0545c|AJW48181.1|UB21_02855|ARN05219.1|BJM02_02830|Probable low-affinity inorganic phosphate transporter	0	0	2	0	0	0	0	0	0	0	0	0	0	0	0	0	0	0	0	0	0	0	0	0	2	0	2	0	0	0	0	0	0	0	0	1
Rv0546c|AJW48182.1|UB21_02860|ARN05220.1|BJM02_02835|Conserved protein	0	0	0	0	0	0	1	0	0	0	0	0	0	0	0	0	0	0	0	0	0	0	0	0	0	0	0	0	0	0	0	0	0	0	0	0
Rv0547c|AJW48183.1|UB21_02865|ARN05221.1|BJM02_02840|Possible oxidoreductase	0	0	0	0	0	0	0	0	0	2	0	0	0	0	0	0	0	0	0	0	0	0	0	0	0	0	0	0	0	0	0	0	0	0	0	0
Rv0549c|AJW48184.1|UB21_02875|ARN05223.1|BJM02_02850|Ribonuclease VapC3 (RNase VapC3) (EC 3.1.-.-) (Toxin VapC3)	0	0	0	0	0	0	0	0	0	0	0	0	0	0	0	0	0	0	0	0	0	0	0	0	0	0	0	0	0	0	0	0	0	0	0	0
Rv0550c|AJW48185.1|UB21_02880|ARN05224.1|BJM02_02855|Antitoxin VapB3	0	0	0	0	0	0	0	0	0	0	0	0	0	0	0	0	0	0	0	0	0	0	0	0	0	0	0	0	0	0	0	0	0	0	0	0
Rv0551c|AJW48186.1|UB21_02885|ARN05225.1|BJM02_02860|Probable fatty-acid-CoA ligase FadD8 (Fatty-acid-CoA synthetase) (Fatty-acid-CoA synthase)	0	0	0	0	0	0	0	0	0	0	0	0	0	0	0	0	0	0	0	0	0	0	0	0	0	0	0	0	0	0	0	0	0	0	0	0
Rv0552|AJW48187.1|UB21_02890|ARN05226.1|BJM02_02865|Conserved protein	0	3	0	0	0	0	0	0	0	0	0	0	0	0	0	0	0	0	0	0	0	0	0	0	2	0	0	0	0	0	0	0	0	0	0	0
Rv0553|AJW48188.1|UB21_02895|ARN08270.1|BJM02_02870|o-succinylbenzoate synthase (OSB synthase) (OSBS) (EC 4.2.1.113) (4-(2'-carboxyphenyl)-4-oxybutyric acid synthase) (o-succinylbenzoic acid synthase)	0	0	0	0	0	0	0	0	0	0	0	0	0	0	0	0	0	1	0	0	0	0	0	0	0	0	0	0	0	0	0	0	0	0	0	0
Rv0554|AJW48189.1|UB21_02900|ARN05227.1|BJM02_02875|Putative non-heme bromoperoxidase BpoC (EC 1.11.1.18)	2	0	0	0	0	0	0	0	0	0	0	0	0	0	0	0	0	0	0	0	0	0	0	0	0	0	0	0	0	0	0	0	0	0	0	0
Rv0555|AJW48190.1|UB21_02905|ARN05228.1|BJM02_02880|2-succinyl-5-enolpyruvyl-6-hydroxy-3-cyclohexene-1-carboxylate synthase (SEPHCHC synthase) (EC 2.2.1.9) (Menaquinone biosynthesis protein MenD)	0	0	0	0	0	0	0	0	0	0	0	0	0	0	0	0	0	0	0	0	0	0	0	0	0	0	0	0	0	0	0	0	0	0	0	0
Rv0556|AJW48191.1|UB21_02910|ARN05229.1|BJM02_02885|Probable conserved transmembrane protein	0	0	0	0	0	0	0	0	0	0	0	0	0	0	0	0	0	0	0	0	0	0	0	0	0	0	0	0	0	0	2	1	0	0	0	0
Rv0557|AJW48192.1|UB21_02915|ARN05230.1|BJM02_02890|GDP-mannose-dependent alpha-mannosyltransferase (EC 2.4.1.-) (Guanosine diphosphomannose-dependent alpha-mannosyltransferase)	0	0	2	0	0	0	0	0	0	0	0	0	0	0	0	0	0	0	4	0	2	0	2	0	0	0	0	0	2	2	0	1	2	0	0	0
Rv0558|AJW48193.1|UB21_02920|ARN05231.1|BJM02_02895|Demethylmenaquinone methyltransferase (EC 2.1.1.163)	0	0	0	0	0	0	0	0	0	0	0	0	0	0	0	0	0	0	0	0	0	0	4	0	0	0	0	0	0	0	0	2	0	0	0	0
Rv0559c|AJW48194.1|UB21_02925|ARN05232.1|BJM02_02900|Uncharacterized protein Rv0559c	0	0	0	4	0	0	0	0	0	0	0	0	0	2	0	0	0	0	0	0	0	0	0	0	0	0	0	0	0	0	0	0	0	0	0	0
Rv0560c|AJW48195.1|UB21_02930|ARN05233.1|BJM02_02905|Uncharacterized protein Rv0560c	0	0	0	0	0	0	0	0	0	0	0	0	0	0	0	0	0	0	0	0	0	0	0	0	0	0	0	0	0	0	0	0	0	0	0	0
Rv0561c|AJW48196.1|UB21_02935|ARN05234.1|BJM02_02910|Menaquinone reductase (MK reductase) (EC 1.3.99.38)	0	0	0	0	0	0	0	0	0	0	0	0	0	0	0	0	0	0	0	0	0	0	0	0	0	0	0	0	0	0	0	0	0	0	0	0
Rv0562|AJW48197.1|UB21_02940|ARN05235.1|BJM02_02915|Probable polyprenyl-diphosphate synthase GrcC1 (Polyprenyl pyrophosphate synthetase)	0	0	0	0	0	0	0	0	0	0	0	0	0	0	2	2	0	0	0	0	0	0	0	0	0	0	0	0	0	0	0	0	0	0	0	0
Rv0563|AJW48198.1|UB21_02945|ARN05236.1|BJM02_02920|Protease HtpX homolog (EC 3.4.24.-)	0	0	0	0	0	0	0	0	0	0	1	2	0	2	0	0	0	0	0	0	0	0	0	2	0	0	0	0	0	0	0	0	0	0	0	0
Rv0564c|AJW51105.1|UB21_02950|ARN08271.1|BJM02_02925|Probable glycerol-3-phosphate dehydrogenase 2 [NAD(P)+] (EC 1.1.1.94) (NAD(P)H-dependent glycerol-3-phosphate dehydrogenase 2)	0	0	1	0	0	0	0	0	0	0	0	0	0	0	0	0	0	0	0	0	0	0	0	0	2	0	0	0	0	0	0	0	0	0	0	0
Rv0565c|AJW48199.1|UB21_02955|ARN05237.1|BJM02_02930|Probable monooxygenase	0	0	0	0	0	0	2	0	0	0	0	0	0	0	0	0	0	0	0	0	0	0	0	0	0	0	0	0	0	0	0	0	0	0	0	0
Rv0566c|AJW48200.1|UB21_02960|ARN05238.1|BJM02_02935|UPF0234 protein Rv0566c	0	0	0	0	0	0	0	0	0	0	0	0	4	0	0	0	0	0	0	0	0	0	0	0	0	0	0	0	0	0	0	0	0	0	0	0
Rv0568|AJW48201.1|UB21_02975|ARN05240.1|BJM02_02950|Putative cytochrome P450 135B1 (EC 1.14.-.-)	2	1	2	0	0	0	0	0	1	0	0	0	0	0	0	0	0	0	0	4	0	0	0	0	1	0	0	0	0	2	2	0	0	0	0	0
Rv0569|AJW48202.1|UB21_02980|ARN05241.1|BJM02_02955|Uncharacterized protein Rv0569	0	0	0	0	0	0	0	0	0	0	0	0	0	1	0	0	0	0	0	0	0	0	0	0	0	0	0	2	0	0	0	0	0	0	0	0
Rv0570|AJW48203.1|UB21_02985|ARN05242.1|BJM02_02960|Vitamin B12-dependent ribonucleoside-diphosphate reductase (B12-dependent RNR) (EC 1.17.4.1) (Ribonucleotide reductase)	0	0	0	0	0	0	0	0	0	0	0	0	0	1	0	0	0	0	1	0	2	0	1	2	2	0	2	1	1	3	0	1	0	0	0	0
Rv0571c|AJW48204.1|UB21_02990|ARN05243.1|BJM02_02965|Putative phosphoribosyl transferase Rv0571c	0	0	0	0	0	0	0	0	0	0	0	0	0	0	0	0	0	0	0	0	0	0	0	0	0	0	0	0	0	0	2	0	0	0	0	0
Rv0572c|AJW48205.1|UB21_02995|ARN05244.1|BJM02_02970|Uncharacterized protein Rv0572c	0	0	0	0	0	0	0	0	0	0	0	0	0	0	0	0	0	2	0	0	0	0	0	0	0	0	0	0	0	0	0	2	0	0	0	0
Rv0573c|AJW48206.1|UB21_03000|ARN05245.1|BJM02_02975|Nicotinate phosphoribosyltransferase pncB2 (NAPRTase pncB2) (EC 6.3.4.21)	0	0	0	0	0	0	0	0	0	0	0	0	0	0	0	0	0	0	0	0	0	0	0	0	0	0	0	0	0	0	0	0	0	0	0	0
Rv0574c|AJW48207.1|UB21_03005|ARN05246.1|BJM02_02980|Probable polyglutamine synthesis accessory protein Rv0574c	0	0	0	0	0	0	0	0	0	0	0	0	0	0	0	0	0	0	0	0	0	0	0	0	0	0	0	0	0	0	2	0	0	0	0	0
Rv0575c|AJW48208.1|UB21_03010|ARN05247.1|BJM02_02985|Possible oxidoreductase	0	0	0	0	0	0	0	0	0	0	0	0	0	0	0	0	0	0	0	0	0	0	0	0	0	0	0	0	0	0	0	0	0	0	0	0
Rv0577|AJW51106.1|UB21_03020|ARN08273.1|BJM02_02995|Putative glyoxylase CFP32 (27 kDa antigen Cfp30B)	0	0	0	0	0	0	0	0	0	0	1	0	0	0	0	0	0	0	0	0	0	0	0	0	0	1	0	0	0	0	0	0	0	4	0	0
Rv0579|AJW48209.1|UB21_03030|ARN05248.1|BJM02_03005|Uncharacterized protein	0	0	0	0	0	0	0	0	0	0	0	0	0	0	0	0	0	0	0	0	0	0	0	0	0	0	0	0	0	0	0	0	0	0	0	0
Rv0580c|AJW51107.1|UB21_03035|ARN08274.1|BJM02_03010|Conserved protein	0	0	0	0	0	0	0	0	0	0	0	0	0	0	0	0	0	0	0	0	0	0	0	0	0	0	0	0	0	0	0	0	0	0	0	0
Rv0581|AJW48210.1|UB21_03040|ARN05249.1|BJM02_03015|Antitoxin VapB26	0	0	0	0	0	0	0	0	0	0	0	0	0	0	0	0	0	0	0	0	0	0	0	0	0	0	0	0	0	0	0	0	0	0	0	0
Rv0582|AJW48211.1|UB21_03045|ARN05250.1|BJM02_03020|Ribonuclease VapC26 (RNase VapC26) (EC 3.1.-.-) (Toxin VapC26)	0	0	0	0	0	0	0	0	0	0	0	0	0	0	0	0	0	0	0	0	0	0	0	0	0	0	0	0	0	0	0	0	0	0	0	0
Rv0583c|AJW48212.1|UB21_03050|ARN05251.1|BJM02_03025|Lipoprotein LpqN	0	0	0	0	0	0	0	0	0	0	0	0	0	0	0	0	0	0	0	0	0	0	0	0	0	0	0	0	0	0	0	0	0	0	0	0
Rv0584|AJW48213.1|UB21_03055|ARN05252.1|BJM02_03030|Uncharacterized glycosidase Rv0584 (EC 3.2.1.-)	0	2	1	1	0	0	0	0	0	0	0	0	0	0	0	0	0	0	0	1	1	0	0	0	0	0	0	0	0	0	0	0	0	0	0	0
Rv0585c|AJW48214.1|UB21_03060|ARN05253.1|BJM02_03035|Probable conserved integral membrane protein	0	0	0	0	0	0	0	0	2	0	0	0	0	0	0	0	0	0	0	0	0	0	0	0	0	0	0	0	0	1	0	0	0	0	0	0
Rv0586|AJW48215.1|UB21_03065|ARN05254.1|BJM02_03040|HTH-type transcriptional regulator Mce2R	0	0	2	0	0	0	0	0	0	0	0	0	0	0	0	0	0	0	0	0	0	0	0	0	0	0	0	0	0	0	0	0	0	0	0	0
Rv0587|AJW48216.1|UB21_03070|ARN05255.1|BJM02_03045|Conserved hypothetical integral membrane protein YrbE2A	1	0	0	0	0	0	0	0	0	0	0	0	0	0	1	0	0	0	1	0	0	0	0	0	0	0	0	0	0	0	1	1	0	0	0	0
Rv0588|AJW48217.1|UB21_03075|ARN05256.1|BJM02_03050|Conserved hypothetical integral membrane protein YrbE2B	0	0	0	0	0	0	0	0	0	0	0	0	0	0	0	0	0	0	0	0	0	0	0	0	0	2	0	0	0	0	0	0	0	0	2	0
Rv0589|AJW51108.1|UB21_03080|ARN05257.1|BJM02_03055|Mce-family protein Mce2A	0	0	0	0	0	0	0	0	0	0	0	0	0	0	0	0	0	0	2	0	2	0	0	0	0	0	0	0	0	0	0	0	0	0	0	0
Rv0590|AJW48218.1|UB21_03085|ARN05258.1|BJM02_03060|Mce-family protein Mce2B	1	0	0	0	0	0	0	0	0	0	0	0	0	0	0	0	0	0	0	2	0	0	0	0	0	0	0	0	0	0	0	0	0	0	0	0
Rv0591|AJW48219.1|UB21_03090|ARN05259.1|BJM02_03065|Mce-family protein Mce2C	0	0	0	0	0	0	0	0	0	0	0	0	0	0	0	0	0	0	0	0	0	0	0	0	0	0	0	0	0	0	2	0	0	0	0	0
Rv0592|AJW48220.1|UB21_03095|ARN05260.1|BJM02_03070|Mce-family protein Mce2D	0	0	2	0	0	0	0	0	0	0	0	0	2	0	0	0	0	0	0	0	0	0	0	0	0	0	0	0	0	0	0	0	0	0	0	0
Rv0593|AJW48221.1|UB21_03100|ARN05261.1|BJM02_03075|Possible Mce-family lipoprotein LprL (Mce-family lipoprotein Mce2E)	0	0	0	0	0	0	0	0	0	0	0	0	2	0	0	0	0	0	0	0	0	0	0	0	0	0	0	0	0	0	0	0	0	0	0	0
Rv0594|AJW51109.1|UB21_03105|ARN08275.1|BJM02_03080|Mce-family protein Mce2F	0	0	0	0	0	0	0	0	0	0	0	0	0	0	2	0	0	0	0	2	0	2	0	0	0	0	0	0	0	0	0	0	0	0	2	0
Rv0595c|AJW51110.1|UB21_03110|ARN08276.1|BJM02_03085|Ribonuclease VapC4 (RNase VapC4) (EC 3.1.-.-) (Toxin VapC4) (VapC-mt4)	0	0	0	0	0	0	0	0	0	0	0	0	0	0	0	0	0	0	0	0	0	0	0	0	0	0	0	0	0	0	0	0	0	0	0	0
Rv0596c|AJW48222.1|UB21_03115|ARN05262.1|BJM02_03090|Antitoxin VapB4 (VapB-mt4)	0	0	0	0	0	0	0	0	0	0	0	0	0	0	0	0	0	0	0	0	0	0	0	0	0	0	0	0	0	0	0	0	0	0	0	0
Rv0597c|AJW48223.1|UB21_03120|ARN05263.1|BJM02_03095|Uncharacterized protein	1	1	0	0	0	0	0	0	0	0	0	0	0	0	0	0	0	0	0	0	0	0	0	0	0	0	0	0	0	0	0	0	0	0	0	0
Rv0598c|AJW48224.1|UB21_03125|ARN05264.1|BJM02_03100|Ribonuclease VapC27 (RNase VapC27) (EC 3.1.-.-) (Toxin VapC27)	0	0	0	0	0	0	0	0	0	0	0	0	0	0	0	0	0	0	0	0	0	0	0	0	0	0	0	0	0	0	0	0	0	0	0	0
Rv0599c|AJW48225.1|UB21_03130|ARN05265.1|BJM02_03105|Antitoxin VapB27	0	0	0	0	0	0	0	0	0	0	0	0	0	0	0	0	0	0	0	0	0	0	0	0	0	0	0	0	0	0	0	0	0	0	0	0
Rv0600c|AJW48226.1|UB21_03135|ARN05266.1|BJM02_03110|Sensor histidine kinase component HK1 (EC 2.7.13.3)	0	0	0	0	0	0	0	0	0	0	0	0	0	0	0	0	0	0	1	0	0	0	0	0	0	0	0	0	0	0	0	0	0	0	0	0
Rv0601c|AJW48227.1|UB21_03140|ARN05267.1|BJM02_03115|Sensor histidine kinase component HK2 (EC 2.7.13.3)	0	0	0	0	0	0	0	0	0	0	0	0	0	0	0	0	0	1	0	0	0	0	0	0	0	0	0	0	0	0	0	0	0	0	0	0
Rv0602c|AJW48228.1|UB21_03145|ARN05268.1|BJM02_03120|Transcriptional regulatory protein TcrA	0	0	0	0	0	0	0	0	0	0	0	0	0	0	0	0	0	0	0	0	0	0	1	0	0	0	0	0	0	0	0	0	0	0	0	0
Rv0603|AJW48229.1|UB21_03150|ARN05269.1|BJM02_03125|Possible exported protein	0	0	0	0	0	0	0	0	0	0	0	0	0	0	0	0	0	0	0	0	0	0	0	0	0	0	2	0	0	0	0	0	0	0	0	0
Rv0604|AJW48230.1|UB21_03155|ARN05270.1|BJM02_03130|Probable conserved lipoprotein LpqO	0	0	2	0	0	0	0	0	0	0	2	0	0	3	0	0	0	0	0	0	0	0	0	0	2	0	0	0	0	0	0	0	0	0	0	0
Rv0605|AJW48231.1|UB21_03160|ARN05271.1|BJM02_03135|Possible resolvase	0	0	0	0	0	0	0	0	0	0	0	0	1	0	0	0	0	0	0	0	0	0	0	0	0	0	0	0	0	0	0	0	0	0	0	0
Rv0606|AJW48232.1|UB21_03165|ARN05272.1|BJM02_03140|Possible transposase	0	0	0	0	0	0	0	0	0	0	1	0	0	0	0	0	0	0	0	0	0	0	0	0	0	0	0	0	0	0	0	0	0	0	0	0
Rv0607|AJW48233.1|UB21_03170|ARN05273.1|BJM02_03145|Uncharacterized protein	0	0	0	0	0	0	0	0	0	0	1	0	0	0	0	0	0	0	0	0	0	0	0	0	0	0	0	0	0	0	0	0	0	0	0	0
Rv0608|AJW48234.1|UB21_03175|ARN05274.1|BJM02_03150|Antitoxin VapB28	0	0	0	0	0	0	0	0	0	0	0	0	0	0	0	2	0	0	0	0	0	0	0	0	0	0	0	0	0	0	0	0	0	0	0	0
Rv0609|AJW48235.1|UB21_03180|ARN05275.1|BJM02_03155|Ribonuclease VapC28 (RNase VapC28) (EC 3.1.-.-) (Toxin VapC28)	0	0	0	1	0	0	0	0	0	0	0	0	0	0	0	0	0	0	0	0	0	0	0	0	0	0	0	0	0	0	0	0	0	0	0	0
Rv0609A|AJW48236.1|UB21_03185|ARN05276.1|BJM02_03160|Uncharacterized protein	0	0	0	0	0	0	0	0	0	0	0	0	0	0	0	0	0	0	0	0	0	0	0	0	0	0	0	0	0	0	0	0	0	0	0	0
Rv0610c|AJW48238.1|UB21_03195|ARN05278.1|BJM02_03170|Uncharacterized protein	0	0	0	0	0	0	0	0	0	0	0	0	0	0	0	0	0	2	0	0	2	0	2	0	3	2	1	1	1	0	0	0	0	0	0	0
Rv0611c|AJW48239.1|UB21_03200|ARN05279.1|BJM02_03175|Uncharacterized protein	0	0	0	2	0	0	0	0	0	0	0	0	0	0	0	0	0	0	0	0	0	0	0	0	2	0	0	0	0	0	2	0	0	0	0	0
Rv0612|AJW48240.1|UB21_03205|ARN05280.1|BJM02_03180|Uncharacterized protein	0	0	0	0	1	0	0	0	0	0	0	0	0	0	0	0	0	0	0	0	2	0	1	0	0	0	1	0	0	0	0	0	0	0	0	0
Rv0613c|AJW51111.1|UB21_03210|ARN08277.1|BJM02_03185|Uncharacterized protein	0	0	0	0	1	0	1	0	2	0	0	2	0	2	0	2	2	4	2	3	0	0	0	1	8	2	1	1	0	2	0	1	0	2	0	0
Rv0614|AJW48241.1|UB21_03215|ARN05281.1|BJM02_03190|Uncharacterized protein	0	0	0	0	0	0	0	0	0	0	0	0	0	0	0	0	0	0	0	0	0	0	0	0	0	0	0	0	0	0	0	0	0	0	0	0
Rv0615|AJW48242.1|UB21_03220|ARN05282.1|BJM02_03195|Probable integral membrane protein	0	0	0	0	0	0	0	0	0	0	0	0	0	0	0	0	0	0	0	0	0	0	0	0	0	0	0	0	0	0	0	0	0	0	0	0
Rv0616A|AJW48244.1|UB21_03230|ARN05284.1|BJM02_03205|Putative antitoxin VapB29	0	0	0	0	0	0	0	0	0	0	0	0	0	0	0	0	0	0	0	0	0	0	0	0	0	0	0	0	0	0	0	0	0	0	0	0
Rv0616c|AJW48243.1|UB21_03225|ARN05283.1|BJM02_03200|Uncharacterized protein	0	0	0	0	0	0	0	0	0	0	0	0	0	0	0	1	0	0	0	0	0	0	0	0	0	0	0	0	0	0	0	0	0	0	0	0
Rv0617|AJW48245.1|UB21_03235|ARN05285.1|BJM02_03210|Ribonuclease VapC29 (RNase VapC29) (EC 3.1.-.-) (Toxin VapC29)	0	0	0	0	0	0	0	0	0	0	0	0	0	0	0	0	0	0	0	0	0	0	0	0	0	0	0	0	0	0	0	2	0	0	0	0
Rv0620|AJW48246.1|UB21_03245|ARN05286.1|BJM02_03220|Galactokinase (EC 2.7.1.6) (Galactose kinase)	0	0	0	0	0	0	0	0	0	0	0	0	0	0	0	0	0	0	0	0	0	0	0	0	0	0	0	0	0	0	0	0	0	0	0	0
Rv0621|AJW51113.1|UB21_03255|ARN08278.1|BJM02_03230|Possible membrane protein	0	0	0	0	0	0	0	0	0	0	0	0	0	0	0	0	0	0	1	0	0	0	0	0	0	0	0	0	0	0	0	0	0	0	0	0
Rv0622|AJW48247.1|UB21_03260|ARN05287.1|BJM02_03235|Possible membrane protein	0	0	0	0	0	0	0	0	0	0	0	0	0	0	0	0	0	0	0	0	0	0	0	0	0	0	0	0	0	0	0	0	0	0	0	0
Rv0623|AJW48248.1|UB21_03265|ARN05288.1|BJM02_03240|Antitoxin VapB30	0	0	0	0	0	0	0	0	0	0	0	0	0	0	0	0	0	0	0	0	0	0	0	0	0	0	0	0	0	0	0	0	0	0	0	0
Rv0624|AJW48249.1|UB21_03270|ARN05289.1|BJM02_03245|Ribonuclease VapC30 (RNase VapC30) (EC 3.1.-.-) (Toxin VapC30)	0	2	0	0	0	0	0	0	0	0	0	0	0	0	0	0	0	0	0	0	0	0	0	0	0	0	0	0	0	0	0	0	0	0	0	0
Rv0626|AJW48250.1|UB21_03280|ARN05291.1|BJM02_03255|Putative antitoxin VapB5	0	0	0	0	0	0	0	0	0	0	0	0	0	0	0	0	1	0	0	0	0	0	0	0	2	0	0	0	0	0	0	0	0	0	0	0
Rv0627|AJW48251.1|UB21_03285|ARN05292.1|BJM02_03260|Ribonuclease VapC5 (RNase VapC5) (EC 3.1.-.-) (Toxin VapC5)	0	0	0	0	0	0	0	0	0	0	0	0	0	0	0	0	0	0	0	0	0	0	0	0	0	0	0	0	0	0	0	0	0	0	0	0
Rv0628c|AJW48252.1|UB21_03290|ARN05293.1|BJM02_03265|Uncharacterized protein Rv0628c	0	0	0	2	0	0	0	0	0	0	0	0	0	0	0	0	0	0	0	1	0	0	0	0	0	0	0	0	0	0	0	0	0	0	0	2
Rv0629c|AJW48253.1|UB21_03295|ARN05294.1|BJM02_03270|RecBCD enzyme subunit RecD (EC 3.1.11.5) (Exonuclease V subunit RecD) (ExoV subunit RecD) (Helicase/nuclease RecBCD subunit RecD)	0	0	0	0	0	0	0	0	0	0	0	0	0	0	0	0	0	0	0	0	0	0	0	0	0	0	0	0	0	0	0	0	0	0	0	0
Rv0630c|AJW48254.1|UB21_03300|ARN05295.1|BJM02_03275|RecBCD enzyme subunit RecB (EC 3.1.11.5) (Exonuclease V subunit RecB) (ExoV subunit RecB) (Helicase/nuclease RecBCD subunit RecB)	1	0	0	0	0	1	0	0	0	0	0	0	0	0	0	0	0	0	0	0	0	0	0	0	0	0	0	0	0	0	0	0	0	0	0	0
Rv0631c|AJW48255.1|UB21_03305|ARN05296.1|BJM02_03280|RecBCD enzyme subunit RecC (EC 3.1.11.5) (Exonuclease V subunit RecC) (ExoV subunit RecC) (Helicase/nuclease RecBCD subunit RecC)	0	0	0	0	0	0	0	0	0	0	0	0	0	0	0	0	1	0	0	0	0	0	0	0	0	0	0	1	0	0	0	0	0	0	0	0
Rv0632c|AJW48256.1|UB21_03310|ARN05297.1|BJM02_03285|Probable enoyl-CoA hydratase EchA3 (Enoyl hydrase) (Unsaturated acyl-CoA hydratase) (Crotonase)	0	1	2	0	0	0	0	0	0	0	0	0	2	0	0	0	0	0	0	0	0	0	0	0	4	0	0	0	0	0	0	0	0	0	0	0
Rv0633c|AJW51114.1|UB21_03315|ARN08280.1|BJM02_03290|Possible exported protein	0	0	0	0	0	0	0	0	0	0	0	0	0	0	0	0	0	0	0	0	0	0	0	0	0	0	0	0	2	0	0	0	0	0	0	0
Rv0634A|AJW48258.1|UB21_03325|ARN05299.1|BJM02_03300|Uncharacterized protein Rv0634A	0	0	0	2	0	0	0	0	0	0	0	0	0	0	0	0	0	0	0	0	0	0	0	0	0	0	0	0	0	0	0	0	0	0	0	0
Rv0634B|AJW48259.1|UB21_03340|ARN05300.1|BJM02_03315|50S ribosomal protein L33 2	0	0	0	0	0	1	0	0	0	0	0	0	0	0	0	0	0	0	0	0	0	0	0	0	0	0	0	0	0	0	0	0	0	0	0	0
Rv0634c|AJW48257.1|UB21_03320|ARN05298.1|BJM02_03295|Possible glyoxalase II (Hydroxyacylglutathione hydrolase) (GLX II)	2	0	0	0	0	0	0	0	0	0	0	0	0	0	0	2	0	0	0	0	0	0	0	0	0	0	0	0	0	0	0	0	0	0	0	0
Rv0635|AJW48260.1|UB21_03345|ARN05301.1|BJM02_03320|UPF0336 protein Rv0635	0	0	0	0	0	0	0	0	0	0	0	0	0	0	0	0	0	2	0	0	0	0	0	0	0	0	0	0	0	0	0	2	0	0	0	0
Rv0636|AJW48261.1|UB21_03350|ARN05302.1|BJM02_03325|(3R)-hydroxyacyl-ACP dehydratase subunit HadB	0	0	0	0	0	0	0	0	0	0	0	0	0	0	2	2	0	0	0	0	0	0	0	0	0	0	0	0	0	0	0	0	0	2	0	0
Rv0637|AJW48262.1|UB21_03355|ARN05303.1|BJM02_03330|UPF0336 protein Rv0637	0	2	0	0	0	0	0	0	0	0	0	0	0	0	0	0	0	0	0	0	0	0	0	0	0	0	0	0	0	0	0	0	0	0	0	0
Rv0638|AJW48263.1|UB21_03365|ARN05304.1|BJM02_03340|Protein translocase subunit SecE	0	0	0	0	0	0	0	0	0	0	0	0	0	2	0	0	0	0	0	0	0	0	0	0	0	0	0	0	0	0	0	0	0	0	1	0
Rv0639|AJW48264.1|UB21_03370|ARN05305.1|BJM02_03345|Transcription termination/antitermination protein NusG	0	0	0	0	0	0	0	0	0	2	4	0	0	0	0	0	0	0	0	2	0	0	0	0	0	2	0	0	2	0	0	0	0	2	1	0
Rv0640|AJW48265.1|UB21_03375|ARN05306.1|BJM02_03350|50S ribosomal protein L11	0	4	0	0	0	0	0	0	0	0	0	0	0	0	0	0	0	0	0	0	1	0	2	0	0	0	0	0	0	0	0	2	0	0	0	0
Rv0641|AJW48266.1|UB21_03380|ARN05307.1|BJM02_03355|50S ribosomal protein L1	2	0	2	2	0	0	0	0	0	2	2	0	0	0	0	0	0	0	2	0	1	2	2	0	2	0	0	0	0	0	0	0	0	0	0	0
Rv0642c|AJW48267.1|UB21_03385|ARN05308.1|BJM02_03360|Hydroxymycolate synthase MmaA4 (EC 2.1.1.-) (Mycolic acid methyltransferase) (MA-MT) (S-adenosylmethionine-dependent methyltransferase) (AdoMet-MT) (SAM-MT)	0	0	2	2	0	0	2	0	0	0	0	0	0	0	0	2	0	0	0	0	0	1	0	2	0	0	0	0	0	0	0	0	0	0	0	0
Rv0643c|AJW48268.1|UB21_03390|ARN05309.1|BJM02_03365|Methoxy mycolic acid synthase MmaA3 (EC 2.1.1.-) (Mycolic acid methyltransferase) (MA-MT) (S-adenosylmethionine-dependent methyltransferase) (AdoMet-MT) (SAM-MT)	0	0	0	0	0	0	0	0	0	0	2	0	0	0	0	0	0	0	0	0	0	1	0	0	0	0	0	0	0	0	2	0	0	0	0	0
Rv0644c|AJW48269.1|UB21_03395|*|*|Cyclopropane mycolic acid synthase MmaA2 (CMAS) (EC 2.1.1.79) (Cyclopropane-fatty-acyl-phospholipid synthase) (CFA synthase) (Mycolic acid methyltransferase) (MA-MT) (S-adenosylmethionine-dependent methyltransferase) (AdoMet-MT) (SAM-MT)	0	0	0	0	0	0	0	0	0	0	0	0	0	0	0	0	0	0	0	0	0	0	0	0	0	0	0	2	0	0	0	0	0	0	0	0
Rv0645c|AJW48270.1|UB21_03400|ARN05310.1|BJM02_03375|Mycolic acid methyltransferase MmaA1 (EC 2.1.1.-) (S-adenosylmethionine-dependent methyltransferase) (AdoMet-MT) (SAM-MT)	1	0	0	0	0	0	0	0	0	0	0	0	0	0	0	0	0	0	0	0	0	0	0	0	0	0	0	0	0	0	0	0	0	0	0	0
Rv0646c|AJW48271.1|UB21_03405|ARN05311.1|BJM02_03380|Probable lipase/esterase LipG	0	0	0	0	0	0	0	0	0	0	0	0	0	0	0	0	0	0	0	0	0	2	0	0	0	0	0	2	0	0	0	0	0	0	0	0
Rv0647c|AJW48272.1|UB21_03410|ARN05312.1|BJM02_03385|Uncharacterized protein Rv0647c	0	0	0	0	0	0	0	0	0	0	0	0	0	0	0	0	0	0	0	0	2	0	0	0	0	0	0	0	0	0	0	0	0	2	0	0
Rv0648|AJW48273.1|UB21_03415|ARN05313.1|BJM02_03390|Alpha-mannosidase	1	4	2	3	0	0	2	1	0	1	1	0	0	2	0	0	2	3	0	1	0	0	0	1	1	1	3	2	0	1	1	1	0	0	0	0
Rv0649|AJW51115.1|UB21_03420|ARN08281.1|BJM02_03395|Possible malonyl CoA-acyl carrier protein transacylase FabD2 (MCT)	13	4	13	5	6	9	15	12	7	5	7	3	11	11	11	17	14	10	17	12	22	14	17	16	6	8	11	4	35	25	43	37	10	16	11	16
Rv0650|AJW48274.1|UB21_03425|ARN05314.1|BJM02_03400|Possible sugar kinase	0	0	0	1	0	0	0	0	0	0	0	0	0	0	0	0	0	0	0	0	0	0	0	0	1	0	0	0	0	0	1	0	0	0	0	0
Rv0651|AJW48275.1|UB21_03430|ARN05315.1|BJM02_03405|50S ribosomal protein L10	0	0	0	0	0	0	0	0	0	0	2	0	0	0	0	0	0	0	0	0	0	0	0	2	0	0	0	0	0	0	0	0	0	0	0	0
Rv0652|AJW48276.1|UB21_03435|ARN05316.1|BJM02_03410|50S ribosomal protein L7/L12	0	0	1	0	1	0	0	0	0	0	0	0	0	0	0	0	1	2	0	1	1	0	1	0	0	3	1	1	0	0	0	2	0	0	0	0
Rv0653c|AJW51116.1|UB21_03440|ARN08282.1|BJM02_03415|Possible transcriptional regulatory protein (Probably TetR-family)	0	2	0	2	2	0	0	0	0	0	0	0	0	0	0	0	0	0	0	0	0	0	0	0	0	0	0	2	0	0	0	0	0	0	0	0
Rv0654|AJW48277.1|UB21_03445|ARN05317.1|BJM02_03420|Carotenoid cleavage oxygenase (CCO) (EC 1.13.11.-) (Carotenoid 13,14/15,15'-oxygenase)	0	0	0	0	0	0	0	2	0	0	0	0	0	0	0	0	0	0	0	0	0	0	2	0	0	0	0	0	0	0	2	0	0	0	0	0
Rv0655|AJW48278.1|UB21_03450|ARN05318.1|BJM02_03425|Probable ribonucleotide transport ATP-binding protein mkl	0	0	0	0	0	0	0	0	0	0	0	0	0	0	0	0	0	0	0	0	0	3	0	0	0	0	0	0	0	0	0	0	0	0	0	0
Rv0656c|AJW48279.1|UB21_03455|ARN05319.1|BJM02_03430|Ribonuclease VapC6 (RNase VapC6) (EC 3.1.-.-) (Toxin VapC6)	0	0	0	0	0	0	0	0	0	0	0	0	0	0	0	0	0	0	0	0	0	0	0	0	0	0	0	0	0	0	0	0	0	0	0	0
Rv0657c|AJW48280.1|UB21_03460|ARN05320.1|BJM02_03435|Putative antitoxin VapB6	0	0	0	0	0	0	0	0	0	0	0	0	0	0	0	0	0	0	0	0	0	0	0	0	0	0	0	0	0	0	0	0	0	0	0	0
Rv0658c|AJW48281.1|UB21_03465|ARN05321.1|BJM02_03440|Probable conserved integral membrane protein	0	0	0	0	0	0	0	0	0	0	0	0	0	0	0	0	0	0	0	0	0	0	0	0	0	0	0	0	0	0	0	0	0	0	0	0
Rv0659c|AJW48282.1|UB21_03470|ARN05322.1|BJM02_03445|Probable endoribonuclease MazF2 (EC 3.1.-.-) (Probable toxin MazF-mt4)	0	0	0	2	0	2	0	0	0	0	0	0	0	0	0	0	0	0	0	0	0	0	0	0	0	0	0	0	0	0	0	0	0	0	0	0
Rv0660c|AJW48283.1|UB21_03475|ARN05323.1|BJM02_03450|Probable antitoxin MazE2	0	0	0	0	0	0	0	0	0	0	0	0	0	0	0	0	0	0	0	0	0	0	0	0	0	0	0	0	0	0	0	0	0	0	0	0
Rv0661c|AJW48284.1|UB21_03480|ARN05324.1|BJM02_03455|Ribonuclease VapC7 (RNase VapC7) (EC 3.1.-.-) (Toxin VapC7)	0	0	0	0	0	0	0	0	0	0	0	0	0	0	0	0	0	0	0	0	0	0	0	0	0	0	0	0	0	0	0	0	0	0	0	0
Rv0662c|AJW48285.1|UB21_03485|ARN05325.1|BJM02_03460|Putative antitoxin VapB7	0	0	0	0	0	0	0	0	0	0	0	0	0	0	0	0	0	0	0	0	0	0	0	0	0	0	0	0	0	0	0	0	0	0	0	0
Rv0663|AJW48286.1|UB21_03490|ARN05326.1|BJM02_03465|Possible arylsulfatase AtsD (Aryl-sulfate sulphohydrolase) (Arylsulphatase)	2	2	0	0	0	0	0	0	0	0	0	0	0	0	0	0	0	0	0	0	0	0	2	0	0	0	0	0	0	0	0	0	0	0	2	0
Rv0664|AJW48287.1|UB21_03495|ARN05327.1|BJM02_03470|Putative antitoxin VapB8	0	0	0	0	0	0	0	0	0	0	0	0	0	0	0	0	0	0	0	0	0	0	0	0	0	0	0	0	0	0	0	0	0	0	0	0
Rv0665|AJW48288.1|UB21_03500|ARN05328.1|BJM02_03475|Ribonuclease VapC8 (RNase VapC8) (EC 3.1.-.-) (Toxin VapC8)	0	0	0	0	0	0	0	0	0	0	0	0	0	0	0	0	0	0	0	0	0	0	0	0	0	0	0	0	0	0	0	0	0	0	0	0
Rv0666|AJW48289.1|UB21_03505|ARN05329.1|BJM02_03480|Possible membrane protein	0	0	0	0	0	0	0	0	0	0	0	0	0	0	0	0	0	0	0	0	0	0	0	0	0	0	0	0	0	0	0	0	0	0	0	0
Rv0667|AJW48290.1|UB21_03510|ARN05330.1|BJM02_03485|DNA-directed RNA polymerase subunit beta (RNAP subunit beta) (EC 2.7.7.6) (RNA polymerase subunit beta) (Transcriptase subunit beta)	1	2	6	5	0	1	2	2	6	0	2	0	0	0	4	0	0	4	0	0	2	0	2	4	2	4	0	2	2	2	6	4	2	4	5	8
Rv0668|AJW48291.1|UB21_03515|ARN05331.1|BJM02_03490|DNA-directed RNA polymerase subunit beta' (RNAP subunit beta') (EC 2.7.7.6) (RNA polymerase subunit beta') (Transcriptase subunit beta')	1	2	0	2	0	0	0	0	0	0	2	4	2	0	0	2	2	1	0	4	0	2	0	2	6	2	0	2	0	1	0	2	0	2	0	0
Rv0669c|AJW48293.1|UB21_03525|ARN05332.1|BJM02_03500|Neutral ceramidase (N-CDase) (NCDase) (EC 3.5.1.23) (Acylsphingosine deacylase) (N-acylsphingosine amidohydrolase)	0	0	0	0	0	0	0	0	0	0	0	0	0	0	0	0	0	0	0	0	0	0	0	0	0	0	0	0	0	0	0	0	0	0	0	0
Rv0670|AJW48294.1|UB21_03530|ARN05333.1|BJM02_03505|Probable endonuclease 4 (EC 3.1.21.2) (Endodeoxyribonuclease IV) (Endonuclease IV)	0	0	0	0	0	0	0	0	0	0	0	0	0	0	0	1	0	0	0	0	0	0	0	0	0	0	0	0	0	0	0	0	0	0	0	0
Rv0671|AJW48295.1|UB21_03535|ARN05334.1|BJM02_03510|Possible conserved lipoprotein LpqP	0	0	1	0	0	0	0	0	0	0	0	0	0	0	0	1	0	0	0	0	0	0	0	0	0	0	0	0	0	0	0	0	0	0	0	0
Rv0672|AJW48296.1|UB21_03540|ARN05335.1|BJM02_03515|Probable acyl-CoA dehydrogenase FadE8	0	0	0	0	0	0	0	0	0	0	0	0	0	2	0	0	2	0	0	0	0	0	0	0	0	0	0	0	0	0	0	0	1	2	0	0
Rv0673|AJW48297.1|UB21_03545|ARN05336.1|BJM02_03520|Possible enoyl-CoA hydratase EchA4 (Enoyl hydrase) (Unsaturated acyl-CoA hydratase) (Crotonase)	0	0	0	0	0	0	0	0	0	2	0	0	4	0	0	2	0	0	0	0	0	0	0	0	0	0	0	0	0	0	0	0	0	0	0	0
Rv0674|AJW48298.1|UB21_03550|ARN05337.1|BJM02_03525|Uncharacterized protein	0	0	0	0	0	0	0	0	0	0	0	0	0	0	0	0	0	0	0	0	0	0	0	0	0	0	0	0	0	0	0	0	0	0	0	0
Rv0676c|AJW48299.1|UB21_03560|ARN05338.1|BJM02_03535|Siderophore exporter MmpL5	0	0	0	1	0	0	0	0	2	0	0	0	0	2	0	0	0	0	0	0	0	2	0	0	0	0	0	2	0	0	0	0	0	2	0	0
Rv0677c|AJW51117.1|UB21_03565|ARN08284.1|BJM02_03540|Siderophore export accessory protein MmpS5	2	0	0	0	0	0	0	0	0	0	2	2	0	0	0	0	0	0	0	0	0	0	0	2	1	0	0	0	0	0	0	0	0	0	0	0
Rv0678|AJW48300.1|UB21_03570|ARN05339.1|BJM02_03545|HTH-type transcriptional regulator MmpR5	0	0	0	0	0	0	0	0	0	0	0	0	0	0	0	0	0	0	0	0	0	0	2	4	0	0	0	0	0	0	0	0	0	0	0	0
Rv0679c|AJW51118.1|UB21_03575|ARN05340.1|BJM02_03550|Conserved threonine rich protein	0	0	0	2	0	0	0	0	0	0	0	0	0	0	0	0	0	0	0	0	0	0	0	0	0	0	0	0	0	0	0	0	0	0	0	2
Rv0680c|AJW48301.1|UB21_03580|ARN05341.1|BJM02_03555|Probable conserved transmembrane protein	0	1	0	0	0	0	0	0	0	0	0	0	0	2	0	0	0	0	0	0	0	0	0	0	0	0	0	0	0	0	0	0	0	0	0	0
Rv0681|AJW48302.1|UB21_03585|ARN05342.1|BJM02_03560|Uncharacterized HTH-type transcriptional regulator Rv0681	0	0	0	0	0	0	0	0	0	0	0	0	0	0	0	0	0	0	0	0	0	0	0	0	0	0	0	2	0	0	0	0	0	0	0	0
Rv0682|AJW48303.1|UB21_03590|ARN05343.1|BJM02_03565|30S ribosomal protein S12	1	0	0	0	0	0	0	0	1	0	2	0	0	2	0	0	0	0	0	0	0	0	0	0	0	0	2	0	0	0	2	0	0	0	0	0
Rv0683|AJW48304.1|UB21_03595|ARN05344.1|BJM02_03570|30S ribosomal protein S7	0	0	0	0	0	0	2	0	1	2	0	0	0	0	3	2	0	2	0	0	0	0	2	0	0	0	0	2	0	0	0	0	0	0	0	2
Rv0685|AJW48306.1|UB21_03605|ARN05346.1|BJM02_03580|Elongation factor Tu (EF-Tu)	0	4	2	0	2	0	0	2	0	0	3	0	4	0	10	2	5	0	0	0	2	0	2	4	0	0	0	0	2	0	2	0	0	2	0	0
Rv0686|AJW48307.1|UB21_03610|ARN05347.1|BJM02_03585|Probable membrane protein	0	0	0	0	0	0	0	0	0	0	0	0	0	0	0	0	0	0	0	0	0	0	2	0	0	0	0	0	0	0	0	0	0	0	0	0
Rv0687|AJW48308.1|UB21_03615|ARN05348.1|BJM02_03590|Uncharacterized NAD-dependent oxidoreductase Rv0687 (EC 1.-.-.-)	0	0	0	0	0	0	0	0	0	0	0	0	0	0	0	0	0	0	0	0	0	0	0	0	0	0	0	0	0	0	0	0	0	0	0	1
Rv0688|AJW48309.1|UB21_03620|ARN05349.1|BJM02_03595|Putative ferredoxin reductase	2	2	1	0	0	0	0	0	0	0	0	0	0	0	0	0	0	0	0	0	0	0	0	0	0	0	0	0	0	0	0	0	0	0	2	0
Rv0689c|AJW48310.1|UB21_03625|ARN05350.1|BJM02_03600|Uncharacterized protein	0	0	0	0	0	0	0	0	0	0	0	0	0	0	0	0	0	0	0	0	0	0	0	0	0	0	0	0	0	0	0	0	0	0	0	0
Rv0690c|AJW48311.1|UB21_03630|ARN05351.1|BJM02_03605|Uncharacterized protein	0	0	0	0	0	0	0	0	0	0	0	0	0	0	0	0	0	0	1	0	0	0	0	0	0	0	0	0	0	0	0	0	0	0	0	0
Rv0691c|AJW48312.1|UB21_03635|ARN05352.1|BJM02_03610|Putative mycofactocin biosynthesis transcriptional regulator MftR	0	0	0	0	0	0	0	0	0	0	0	0	0	0	0	0	0	0	0	0	0	0	0	0	0	0	0	0	0	0	0	0	0	0	0	0
Rv0692|AJW48314.1|UB21_03645|ARN05354.1|BJM02_03620|Putative mycofactocin system protein MftB	0	0	0	0	0	0	0	0	0	0	0	0	0	0	0	0	0	0	0	0	0	0	0	0	0	0	0	0	0	0	0	0	0	0	0	0
Rv0693|AJW48315.1|UB21_03650|ARN05355.1|BJM02_03625|Putative mycofactocin radical SAM maturase MftC (EC 2.-.-.-)	0	0	0	0	1	0	1	0	2	0	3	1	1	3	2	0	4	0	0	3	2	3	3	1	1	0	1	0	0	0	3	0	1	0	2	0
Rv0694|AJW48316.1|UB21_03655|ARN05356.1|BJM02_03630|Putative mycofactocin system heme/flavin oxidoreductase MftD (EC 1.-.-.-)	2	0	2	0	0	0	0	0	0	0	2	0	0	0	0	0	0	0	0	0	0	0	0	0	0	0	0	0	0	0	0	0	0	0	0	0
Rv0695|AJW48317.1|UB21_03660|ARN05357.1|BJM02_03635|Putative mycofactocin system creatinine amidohydrolase family protein MftE (EC 3.5.-.-)	0	0	0	0	0	0	0	0	0	0	0	0	0	0	0	0	0	0	0	0	0	0	0	0	0	0	0	0	0	0	0	0	0	0	0	0
Rv0696|AJW48318.1|UB21_03665|ARN05358.1|BJM02_03640|Putative mycofactocin biosynthesis glycosyltransferase MftF (EC 2.-.-.-)	0	0	0	0	0	0	0	0	0	0	0	0	0	0	0	0	0	0	0	0	0	0	0	0	0	0	0	0	0	0	0	0	0	0	0	0
Rv0697|AJW48319.1|UB21_03670|ARN05359.1|BJM02_03645|Probable dehydrogenase	0	0	0	0	0	0	0	0	0	0	0	0	0	0	0	0	0	0	0	0	0	0	0	0	0	0	0	0	0	0	0	0	0	0	0	0
Rv0698|AJW48320.1|UB21_03675|*|BJM02_03650|Uncharacterized protein	0	0	0	0	1	0	0	0	0	0	0	0	0	0	1	0	0	0	0	0	0	0	0	0	0	0	0	0	0	0	0	0	0	0	0	0
Rv0699|AJW48321.1|UB21_03680|*|*|Uncharacterized protein	0	0	0	0	0	0	0	0	0	0	0	0	0	0	0	0	0	0	0	0	0	0	0	0	0	0	0	0	0	0	0	0	0	0	0	0
Rv0700|AJW48323.1|UB21_03690|ARN05362.1|BJM02_03665|30S ribosomal protein S10	0	0	0	0	0	0	0	0	0	2	0	0	0	0	0	0	0	0	0	0	1	0	1	0	4	0	2	0	0	2	2	0	0	0	0	0
Rv0701|AJW48324.1|UB21_03695|ARN05363.1|BJM02_03670|50S ribosomal protein L3	0	1	0	1	0	0	0	0	0	0	0	0	0	0	0	2	0	0	0	3	1	1	0	2	0	0	0	0	0	0	0	0	0	0	0	0
Rv0702|AJW51119.1|UB21_03700|ARN05364.1|BJM02_03675|50S ribosomal protein L4	0	0	0	0	0	0	0	0	0	0	4	0	0	0	0	0	0	0	0	0	0	1	0	0	0	0	0	0	0	0	0	0	0	0	0	0
Rv0703|AJW48325.1|UB21_03705|ARN05365.1|BJM02_03680|50S ribosomal protein L23	0	0	0	0	0	0	0	0	0	0	0	1	0	0	0	0	0	0	0	2	0	0	0	0	0	0	0	0	0	0	0	0	0	2	0	1
Rv0704|AJW48326.1|UB21_03710|ARN05366.1|BJM02_03685|50S ribosomal protein L2	0	0	0	0	1	0	0	0	0	0	0	0	2	0	0	0	0	0	0	0	0	0	0	0	0	0	0	0	0	0	0	0	0	0	0	1
Rv0705|AJW48327.1|UB21_03715|ARN05367.1|BJM02_03690|30S ribosomal protein S19	0	0	0	0	1	0	0	0	0	0	0	0	0	0	0	0	0	0	0	0	0	0	0	0	0	0	0	0	0	0	0	0	0	0	0	0
Rv0706|AJW48328.1|UB21_03720|ARN05368.1|BJM02_03695|50S ribosomal protein L22	0	0	0	0	0	0	0	0	0	1	0	0	0	0	0	1	0	0	0	0	2	0	0	0	0	0	0	3	0	0	0	0	0	0	0	0
Rv0707|AJW48329.1|UB21_03725|ARN05369.1|BJM02_03700|30S ribosomal protein S3	0	0	0	0	0	0	0	0	0	0	0	0	0	0	0	0	0	0	0	0	0	0	0	0	0	0	0	0	0	0	0	0	0	0	0	0
Rv0708|AJW48330.1|UB21_03730|ARN05370.1|BJM02_03705|50S ribosomal protein L16	0	0	0	0	0	0	0	0	0	0	0	0	0	1	0	0	0	0	0	0	0	0	0	1	0	0	0	0	0	0	0	0	0	0	0	0
Rv0709|AJW48331.1|UB21_03735|ARN05371.1|BJM02_03710|50S ribosomal protein L29	0	0	0	0	0	0	0	0	0	0	0	0	0	0	0	0	0	0	0	0	0	0	0	0	2	0	0	0	0	0	0	0	0	0	0	0
Rv0710|AJW48332.1|UB21_03740|ARN05372.1|BJM02_03715|30S ribosomal protein S17	0	0	0	0	0	0	0	0	0	0	0	2	0	0	0	0	0	0	0	0	0	0	2	0	0	0	0	0	1	0	2	0	0	0	0	0
Rv0711|AJW48333.1|UB21_03745|ARN05373.1|BJM02_03720|Possible arylsulfatase AtsA (Aryl-sulfate sulphohydrolase) (Arylsulphatase)	0	0	0	2	0	0	0	0	0	0	0	0	0	0	0	0	0	0	2	0	0	0	0	0	0	0	0	2	0	0	0	0	2	2	0	2
Rv0712|AJW48334.1|UB21_03750|ARN05374.1|BJM02_03725|Formylglycine-generating enzyme (FGE) (EC 1.8.3.7)	0	0	0	0	0	0	0	0	0	1	0	0	0	0	0	0	0	0	0	0	0	0	0	0	0	0	0	0	0	0	0	0	0	0	0	0
Rv0713|AJW48335.1|UB21_03755|ARN05375.1|BJM02_03730|Probable conserved transmembrane protein	0	0	0	0	0	0	0	0	0	0	0	0	0	0	0	0	0	0	0	0	0	0	0	0	0	0	0	0	0	0	0	0	0	0	0	0
Rv0714|AJW48336.1|UB21_03760|ARN05376.1|BJM02_03735|50S ribosomal protein L14	0	0	0	0	0	0	0	0	0	0	0	0	1	1	0	0	0	0	0	0	0	0	0	2	0	0	0	0	0	0	0	0	0	0	0	0
Rv0715|AJW48337.1|UB21_03765|ARN05377.1|BJM02_03740|50S ribosomal protein L24	0	0	0	0	0	0	0	0	0	0	0	0	0	0	2	0	0	0	0	0	0	0	0	0	0	0	0	0	0	0	0	0	0	0	0	0
Rv0716|AJW48338.1|UB21_03770|ARN05378.1|BJM02_03745|50S ribosomal protein L5	0	0	0	1	0	0	0	0	0	0	0	0	0	0	0	1	0	2	0	0	2	0	0	2	0	0	0	0	0	2	0	0	0	0	0	2
Rv0718|AJW48340.1|UB21_03780|ARN05380.1|BJM02_03755|30S ribosomal protein S8	0	0	2	0	0	0	0	0	0	1	0	0	0	0	0	0	0	0	0	0	0	2	0	0	0	2	0	0	0	0	0	0	2	0	0	0
Rv0719|AJW48341.1|UB21_03785|ARN05381.1|BJM02_03760|50S ribosomal protein L6	0	0	2	0	0	0	1	0	0	0	0	0	0	0	0	0	0	0	0	0	0	0	0	0	0	0	0	0	0	0	0	0	0	0	0	0
Rv0720|AJW48342.1|UB21_03790|ARN05382.1|BJM02_03765|50S ribosomal protein L18	0	0	0	0	0	0	0	0	2	0	0	0	0	0	0	0	0	0	0	0	0	0	0	0	0	0	0	2	0	0	0	0	0	0	0	0
Rv0721|AJW48343.1|UB21_03795|ARN05383.1|BJM02_03770|30S ribosomal protein S5	0	0	0	0	0	2	0	0	0	0	0	0	1	0	0	0	0	0	0	0	1	0	0	0	0	0	0	0	0	0	0	4	0	0	0	0
Rv0722|AJW48344.1|UB21_03800|ARN05384.1|BJM02_03775|50S ribosomal protein L30	0	0	0	0	0	0	0	0	0	0	0	0	0	0	0	0	0	0	0	0	0	0	0	0	0	0	0	0	0	0	0	0	0	0	0	0
Rv0723|AJW48345.1|UB21_03805|ARN05385.1|BJM02_03780|50S ribosomal protein L15	0	4	0	0	0	0	0	0	0	0	0	0	0	0	2	0	0	0	0	0	0	2	0	0	0	0	2	0	0	0	0	0	0	0	0	0
Rv0725c|AJW48346.1|UB21_03815|ARN05387.1|BJM02_03790|S-adenosyl-L-methionine-dependent methyltransferase (EC 2.1.1.-)	0	0	0	0	0	0	0	0	0	0	1	0	0	0	0	0	0	0	0	0	0	0	0	0	0	0	0	0	0	1	0	0	0	2	0	0
Rv0726c|AJW48347.1|UB21_03820|ARN05388.1|BJM02_03795|Putative S-adenosyl-L-methionine-dependent methyltransferase Rv0726c (EC 2.1.1.-)	2	0	0	0	0	0	2	0	2	2	0	2	0	0	2	0	0	2	0	1	0	0	0	0	0	2	0	0	2	0	0	0	0	0	2	0
Rv0727c|AJW48348.1|UB21_03825|ARN05389.1|BJM02_03800|Possible L-fuculose phosphate aldolase FucA (L-fuculose-1-phosphate aldolase)	0	0	0	0	0	0	0	0	0	0	0	0	0	0	0	0	0	0	0	0	0	0	0	0	0	0	0	0	0	2	0	0	0	0	0	0
Rv0728c|AJW48349.1|UB21_03830|ARN05390.1|BJM02_03805|Possible D-3-phosphoglycerate dehydrogenase SerA2 (Phosphoglycerate dehydrogenase) (PGDH)	0	0	0	0	0	0	0	0	0	0	2	0	0	0	0	0	0	0	0	0	0	0	0	0	0	0	0	0	0	0	0	0	0	0	0	0
Rv0729|AJW48350.1|UB21_03835|ARN05391.1|BJM02_03810|Possible D-xylulose kinase XylB (Xylulokinase) (Xylulose kinase)	0	0	0	0	0	0	0	0	0	0	0	0	0	0	0	0	0	0	0	0	0	0	0	0	0	0	0	0	0	0	0	0	0	0	0	0
Rv0730|AJW48351.1|UB21_03840|ARN05392.1|BJM02_03815|DNA topoisomerase (ATP-hydrolyzing) (EC 5.6.2.2)	1	0	1	0	0	0	0	0	0	0	0	0	0	0	0	2	2	0	2	0	0	0	0	0	0	0	0	0	0	2	0	0	0	2	0	0
Rv0731c|AJW48352.1|UB21_03845|ARN05393.1|BJM02_03820|Putative S-adenosyl-L-methionine-dependent methyltransferase Rv0731c (EC 2.1.1.-)	0	0	0	0	0	0	0	0	0	0	0	0	0	0	0	0	0	0	0	0	0	0	0	0	0	0	0	0	0	0	0	0	0	0	1	0
Rv0732|AJW48353.1|UB21_03850|ARN05394.1|BJM02_03825|Protein translocase subunit SecY	0	0	0	0	0	0	0	0	0	0	0	0	0	0	2	0	0	0	0	0	2	0	0	0	0	0	0	0	2	0	0	0	0	0	0	2
Rv0733|AJW48354.1|UB21_03855|ARN05395.1|BJM02_03830|Adenylate kinase (AK) (EC 2.7.4.3) (ATP-AMP transphosphorylase) (ATP:AMP phosphotransferase) (Adenylate monophosphate kinase)	0	0	0	0	0	0	0	2	0	2	0	0	2	0	0	0	1	0	0	0	0	0	0	0	0	0	0	0	0	0	0	0	0	0	2	0
Rv0734|AJW48355.1|UB21_03860|ARN05396.1|BJM02_03835|Methionine aminopeptidase 1 (MAP 1) (MetAP 1) (EC 3.4.11.18) (Peptidase M)	2	0	0	0	0	0	0	0	0	0	0	0	0	0	0	0	0	0	0	0	0	0	0	0	0	0	0	0	0	0	0	0	0	0	0	0
Rv0735|AJW48356.1|UB21_03865|ARN08285.1|BJM02_03840|ECF RNA polymerase sigma factor SigL (ECF sigma factor SigL) (Alternative RNA polymerase sigma factor SigL) (RNA polymerase sigma-L factor) (Sigma-L factor)	0	0	0	0	0	0	0	0	0	0	0	0	0	0	0	0	0	0	0	0	0	0	0	0	0	0	0	0	0	0	0	0	0	0	0	0
Rv0736|AJW48357.1|UB21_03870|ARN05397.1|BJM02_03845|Anti-sigma-L factor RslA (Regulator of SigL) (Sigma-L anti-sigma factor RslA)	0	0	0	0	0	0	0	0	0	0	0	0	0	0	0	0	0	0	0	0	0	0	0	0	0	1	0	0	0	0	0	0	0	0	0	0
Rv0737|AJW48358.1|UB21_03875|ARN05398.1|BJM02_03850|Possible transcriptional regulatory protein	0	0	0	0	0	0	0	0	0	0	0	0	0	0	0	0	0	0	0	0	0	0	0	0	0	0	0	0	0	0	0	0	0	0	0	0
Rv0738|AJW48359.1|UB21_03880|ARN05399.1|BJM02_03855|Uncharacterized protein Rv0738	0	0	0	0	0	0	0	0	0	0	0	0	0	0	0	0	0	0	0	0	0	0	0	0	0	0	0	0	0	0	0	0	0	0	0	0
Rv0739|AJW51120.1|UB21_03885|ARN08286.1|BJM02_03860|Uncharacterized protein Rv0739	0	0	0	0	0	0	0	0	0	0	0	0	0	0	0	0	0	0	0	0	0	0	0	2	0	0	0	0	0	0	0	0	0	0	0	0
Rv0741|AJW48360.1|UB21_03895|ARN05400.1|BJM02_03870|Probable transposase	0	0	0	0	0	0	0	0	0	0	0	0	0	0	0	0	0	0	0	0	0	0	0	0	0	0	0	0	0	0	0	0	0	0	0	0
Rv0742|AJW49765.1|UB21_12700|ARN05401.1|BJM02_03875|PE-PGRS family protein PE_PGRS8	9	5	1	8	159	127	158	143	55	43	64	41	76	90	94	73	435	358	448	405	385	323	390	361	715	573	670	641	312	261	315	315	285	289	317	278
Rv0743c|AJW48361.1|UB21_03905|ARN05402.1|BJM02_03880|Uncharacterized protein	0	0	0	0	0	0	0	2	0	0	0	0	0	0	0	0	0	0	0	0	0	0	0	0	0	0	1	0	1	0	0	0	0	0	0	0
Rv0744c|AJW51122.1|UB21_03910|ARN08288.1|BJM02_03885|Possible transcriptional regulatory protein	0	0	0	0	0	0	0	0	0	0	0	0	0	0	0	0	0	0	0	0	0	0	0	0	0	0	0	0	0	0	0	0	0	0	0	0
Rv0745|AJW51123.1|UB21_03920|ARN08289.1|BJM02_03895|Uncharacterized protein	0	0	0	0	0	0	0	0	0	0	0	0	0	0	0	0	0	0	0	0	0	0	0	0	0	0	0	0	0	0	0	0	0	0	0	0
Rv0747|AJW48363.1|UB21_03935|*|*|Uncharacterized PE-PGRS family protein PE_PGRS10	20	23	20	22	5	4	8	3	4	4	3	4	4	0	1	2	12	18	11	9	4	3	4	4	18	16	17	16	8	3	3	3	1	1	3	5
Rv0748|AJW48365.1|UB21_03945|ARN05406.1|BJM02_03920|Antitoxin VapB31	0	0	0	0	0	0	0	0	0	0	0	0	0	0	0	0	0	0	0	0	0	0	0	0	0	0	0	0	0	0	0	0	0	0	0	0
Rv0749|AJW48366.1|UB21_03950|ARN05407.1|BJM02_03925|Ribonuclease VapC31 (RNase VapC31) (EC 3.1.-.-) (Toxin VapC31)	0	0	0	0	0	0	0	0	0	1	0	0	0	0	0	0	0	0	0	0	0	0	0	0	0	0	0	0	0	0	0	2	0	0	0	0
Rv0749A|AJW48367.1|UB21_03955|ARN05408.1|BJM02_03930|Uncharacterized protein	0	0	0	0	0	0	0	0	0	1	0	0	0	0	0	0	0	0	0	0	0	0	0	0	0	0	0	0	0	0	0	0	0	0	0	0
Rv0750|AJW48368.1|UB21_03960|ARN05409.1|BJM02_03935|Uncharacterized protein	0	0	0	0	0	0	0	0	0	0	0	0	0	0	0	0	0	0	0	0	0	0	0	0	0	0	0	0	0	0	0	0	0	0	0	0
Rv0751c|AJW48369.1|UB21_03965|ARN05410.1|BJM02_03940|Probable 3-hydroxyisobutyrate dehydrogenase (HIBADH) (EC 1.1.1.31)	0	0	0	0	0	0	0	0	0	0	0	0	0	0	0	0	0	0	0	0	0	0	0	0	0	0	0	0	0	0	0	0	0	0	0	0
Rv0752c|AJW48370.1|UB21_03970|ARN05411.1|BJM02_03945|Probable acyl-CoA dehydrogenase FadE9	0	0	0	0	0	0	0	0	0	0	0	0	0	0	0	2	0	0	0	0	1	0	0	0	0	0	1	0	0	1	1	2	0	0	0	0
Rv0753c|AJW48371.1|UB21_03975|ARN05412.1|BJM02_03950|Probable methylmalonate-semialdehyde dehydrogenase MmsA (Methylmalonic acid semialdehyde dehydrogenase) (MMSDH)	0	0	0	0	0	0	0	0	0	0	0	0	0	0	0	0	0	0	0	0	0	0	0	0	0	0	0	0	0	0	0	0	0	0	0	0
Rv0754|AJW48372.1|UB21_03980|ARN05413.1|BJM02_03955|PE-PGRS family protein PE_PGRS11 (PE-PGRS phosphoglycerate mutase) (EC 5.4.2.12)	0	0	1	0	0	0	0	0	0	0	0	0	0	0	0	0	0	0	0	0	0	0	0	0	0	0	0	0	0	0	0	0	0	0	0	0
Rv0755A|AJW48374.1|UB21_03990|ARN05415.1|BJM02_03965|Putative transposase	0	0	0	0	0	0	0	0	0	0	0	0	0	0	0	0	0	0	0	0	0	0	0	0	0	0	0	0	0	0	0	0	0	0	0	0
Rv0755c|AJW48373.1|UB21_03985|ARN05414.1|BJM02_03960|Uncharacterized PPE family protein PPE12	0	0	0	0	0	0	0	0	0	0	0	0	0	0	2	0	4	1	2	0	0	0	2	0	3	1	4	2	0	0	2	0	0	0	0	0
Rv0756c|AJW48375.1|UB21_04000|ARN05416.1|BJM02_03975|Uncharacterized protein	0	0	0	0	0	0	0	2	0	0	0	0	0	0	0	0	0	0	0	2	0	0	0	2	0	2	0	0	0	0	0	0	0	0	0	2
Rv0757|AJW48376.1|UB21_04005|ARN05417.1|BJM02_03980|Possible two component system response transcriptional positive regulator PhoP	0	0	0	2	0	0	0	0	0	0	0	0	0	2	0	4	0	0	0	0	0	0	0	0	0	0	0	0	0	0	0	0	0	0	2	0
Rv0758|AJW48377.1|UB21_04010|ARN05418.1|BJM02_03985|Histidine kinase (EC 2.7.13.3)	0	0	0	0	0	0	0	0	0	0	2	0	0	0	0	0	0	0	0	0	2	2	0	0	0	0	0	0	0	0	0	0	0	0	0	0
Rv0759c|AJW48378.1|UB21_04015|ARN05419.1|BJM02_03990|Uncharacterized HIT-like protein Rv0759c	0	0	0	0	0	0	0	0	0	0	0	0	0	0	0	0	0	0	0	0	0	0	0	0	0	0	0	0	0	0	0	0	1	0	0	0
Rv0760c|AJW48379.1|UB21_04020|ARN05420.1|BJM02_03995|Conserved protein	0	0	0	0	0	0	0	0	0	0	0	0	0	0	0	0	0	0	0	0	0	0	0	0	0	0	0	0	0	0	0	0	0	0	0	0
Rv0761c|AJW48380.1|UB21_04025|ARN05421.1|BJM02_04000|Alcohol dehydrogenase B (EC 1.1.1.1)	0	2	0	0	0	0	0	0	0	0	1	2	0	0	0	0	0	0	0	0	0	0	2	0	0	0	0	0	0	0	0	1	0	0	0	0
Rv0762c|AJW48381.1|UB21_04030|ARN05422.1|BJM02_04005|Uncharacterized protein	0	0	0	0	0	0	0	0	0	0	0	0	0	0	0	0	0	0	0	0	0	0	0	0	0	0	0	0	0	0	0	0	0	0	0	0
Rv0763c|AJW48382.1|UB21_04035|ARN05423.1|BJM02_04010|Possible ferredoxin	0	0	0	0	0	0	0	0	0	0	0	0	0	0	0	0	0	1	0	0	0	0	0	0	0	0	0	0	0	0	0	0	0	0	0	0
Rv0764c|AJW48383.1|UB21_04040|ARN05424.1|BJM02_04015|Lanosterol 14-alpha demethylase (EC 1.14.14.154) (CYPLI) (Cytochrome P450 51) (Cytochrome P450-14DM) (Cytochrome P450-LIA1) (Sterol 14-alpha demethylase)	0	0	0	0	0	0	0	0	0	0	0	0	0	0	0	0	0	0	0	0	0	0	0	0	2	0	0	0	0	0	0	0	0	0	0	0
Rv0765c|AJW48384.1|UB21_04045|ARN05425.1|BJM02_04020|Probable oxidoreductase	0	0	1	0	0	0	0	0	0	0	0	0	0	0	0	0	0	0	0	0	0	0	0	0	0	0	0	0	0	0	0	0	0	0	0	0
Rv0766c|AJW48385.1|UB21_04050|ARN05426.1|BJM02_04025|Putative cytochrome P450 123 (EC 1.14.-.-)	0	0	0	0	0	0	0	0	0	0	0	0	0	0	0	0	0	0	0	0	0	0	0	0	0	0	0	0	0	0	0	0	0	0	0	0
Rv0767c|AJW48386.1|UB21_04055|ARN05427.1|BJM02_04030|Uncharacterized HTH-type transcriptional regulator Rv0767c	0	0	0	0	0	0	0	0	0	0	0	1	0	0	0	0	0	0	0	0	0	0	0	0	0	0	0	0	0	0	0	0	0	0	0	0
Rv0768|AJW48387.1|UB21_04060|ARN05428.1|BJM02_04035|Probable aldehyde dehydrogenase NAD dependent AldA (Aldehyde dehydrogenase [NAD+])	0	0	0	0	0	0	0	0	0	0	0	0	0	0	0	0	0	0	0	2	0	0	0	0	0	0	0	0	0	0	2	2	6	0	0	0
Rv0769|AJW48388.1|UB21_04065|ARN05429.1|BJM02_04040|Uncharacterized oxidoreductase Rv0769 (EC 1.-.-.-)	0	0	0	0	0	0	0	0	0	0	0	0	0	2	0	0	0	0	0	0	0	0	0	0	0	0	0	0	0	0	0	0	0	0	0	0
Rv0770|AJW48389.1|UB21_04070|ARN05430.1|BJM02_04045|Uncharacterized oxidoreductase Rv0770 (EC 1.1.-.-)	0	0	0	0	0	0	0	0	0	0	0	0	0	0	0	0	0	0	0	0	0	0	1	0	0	0	0	0	0	0	0	0	0	0	0	0
Rv0771|AJW48390.1|UB21_04075|ARN05431.1|BJM02_04050|Possible 4-carboxymuconolactone decarboxylase (CMD)	0	0	0	0	0	0	0	0	0	0	0	0	0	0	0	0	0	0	0	0	0	0	0	0	0	0	0	0	0	0	0	0	0	0	0	0
Rv0772|AJW48391.1|UB21_04080|ARN05432.1|BJM02_04055|Phosphoribosylamine--glycine ligase (EC 6.3.4.13) (GARS) (Glycinamide ribonucleotide synthetase) (Phosphoribosylglycinamide synthetase)	0	1	0	0	0	0	0	0	0	0	0	0	0	0	0	0	0	0	0	0	0	0	0	0	0	0	0	0	0	0	0	0	0	0	0	0
Rv0773c|AJW48392.1|UB21_04085|ARN05433.1|BJM02_04060|Probable bifunctional acylase GgtA: cephalosporin acylase (GL-7ACA acylase) + gamma-glutamyltranspeptidase (GGT)	0	0	0	0	0	0	0	0	0	0	0	0	0	0	0	0	0	0	0	0	0	0	0	0	0	0	0	2	0	0	0	0	0	0	0	0
Rv0774c|AJW48393.1|UB21_04090|*|BJM02_04065|Acyl-CoA:diacylglycerol acyltransferase (EC 2.3.1.122) (EC 2.3.1.20)	0	0	0	0	0	0	0	0	0	0	0	1	0	0	0	0	0	0	0	0	0	0	0	0	0	0	0	0	0	0	0	0	0	0	0	0
Rv0775|AJW51124.1|UB21_04095|ARN05434.1|BJM02_04070|HTH tetR-type domain-containing protein	0	0	2	0	0	0	0	0	0	0	0	0	0	0	0	0	0	0	0	0	0	0	0	0	0	0	0	0	0	0	0	0	0	0	0	0
Rv0776c|AJW48394.1|UB21_04100|ARN05435.1|BJM02_04075|Uncharacterized protein	0	0	0	0	0	0	0	0	0	0	0	0	0	0	0	0	0	0	0	0	0	0	0	0	0	0	0	0	0	0	0	0	0	0	0	0
Rv0777|AJW48395.1|UB21_04105|ARN05436.1|BJM02_04080|Adenylosuccinate lyase (ASL) (EC 4.3.2.2) (Adenylosuccinase)	0	0	0	0	2	0	0	0	0	0	0	0	0	0	0	0	0	0	0	0	0	0	0	2	2	0	0	0	0	0	0	0	0	0	0	0
Rv0778|AJW48396.1|UB21_04110|ARN05437.1|BJM02_04085|Putative cytochrome P450 126 (EC 1.14.-.-)	0	0	0	0	0	0	0	0	2	0	0	0	0	0	0	0	0	1	0	0	0	0	2	0	0	0	0	0	0	0	0	0	0	0	0	0
Rv0779c|AJW48397.1|UB21_04115|ARN05438.1|BJM02_04090|Possible conserved transmembrane protein	0	0	0	0	0	0	0	0	0	0	0	0	0	0	0	0	0	0	0	0	0	0	0	0	0	0	0	0	0	0	0	0	0	0	0	0
Rv0780|AJW48398.1|UB21_04120|ARN05439.1|BJM02_04095|Phosphoribosylaminoimidazole-succinocarboxamide synthase (EC 6.3.2.6) (SAICAR synthetase)	0	0	0	0	0	0	0	0	0	0	0	0	0	0	0	0	0	2	0	0	0	0	0	0	0	0	0	0	0	0	0	0	0	0	0	0
Rv0782|AJW48399.1|UB21_04125|ARN05440.1|BJM02_04100|Probable protease II PtrBb [second part] (Oligopeptidase B)	0	0	0	0	0	0	0	0	2	0	0	0	0	0	0	0	2	4	0	0	2	0	0	0	0	0	0	0	0	0	2	0	0	0	0	0
Rv0783c|AJW48401.1|UB21_04135|ARN05442.1|BJM02_04110|Multidrug resistance protein B homolog	3	1	0	0	0	0	0	0	0	0	0	0	1	0	0	0	0	0	0	0	0	0	0	0	0	0	0	0	0	0	0	0	0	0	0	0
Rv0784|AJW48402.1|UB21_04140|ARN05443.1|BJM02_04115|Uncharacterized protein	0	0	0	0	0	0	0	0	4	0	0	0	0	4	0	0	0	0	0	0	7	0	0	0	2	0	2	0	0	2	2	2	2	0	3	5
Rv0785|AJW48403.1|UB21_04145|ARN05444.1|BJM02_04120|KsdD-like steroid dehydrogenase Rv0785 (EC 1.3.99.-)	2	0	0	1	0	1	1	0	0	0	1	0	0	1	0	2	0	0	0	0	0	0	0	1	0	0	0	0	2	1	1	0	0	0	1	0
Rv0786c|AJW48404.1|UB21_04150|ARN05445.1|BJM02_04125|Conserved protein	0	0	0	0	0	0	0	0	0	0	0	0	0	0	2	0	0	0	0	1	0	0	0	0	0	0	0	0	0	0	0	0	0	0	0	0
Rv0787|AJW51125.1|UB21_04155|ARN08290.1|BJM02_04130|Uncharacterized protein	0	0	0	0	0	0	0	0	0	0	0	0	0	0	0	0	0	0	0	0	0	0	1	0	0	0	0	0	0	0	0	0	0	0	0	0
Rv0787A|AJW48405.1|UB21_04160|ARN05446.1|BJM02_04135|Phosphoribosylformylglycinamidine synthase subunit PurS (FGAM synthase) (EC 6.3.5.3) (Formylglycinamide ribonucleotide amidotransferase subunit III) (FGAR amidotransferase III) (FGAR-AT III) (Phosphoribosylformylglycinamidine synthase subunit III)	0	0	0	0	0	0	0	0	0	0	0	0	0	0	0	0	0	0	0	0	0	0	1	0	0	0	0	0	0	0	0	0	0	0	0	0
Rv0788|AJW48406.1|UB21_04165|ARN05447.1|BJM02_04140|Phosphoribosylformylglycinamidine synthase subunit PurQ (FGAM synthase) (EC 6.3.5.3) (Formylglycinamide ribonucleotide amidotransferase subunit I) (FGAR amidotransferase I) (FGAR-AT I) (Glutaminase PurQ) (EC 3.5.1.2) (Phosphoribosylformylglycinamidine synthase subunit I)	0	0	2	2	0	0	0	0	0	0	0	0	2	0	0	0	0	0	0	0	0	0	0	0	0	0	0	0	2	2	0	0	0	0	0	0
Rv0789c|AJW48407.1|UB21_04170|ARN05448.1|BJM02_04145|Uncharacterized protein	0	0	0	0	0	0	0	0	0	0	0	0	0	0	0	0	0	0	0	0	0	0	0	0	0	0	0	0	0	0	1	2	0	0	0	0
Rv0790c|AJW48408.1|UB21_04175|ARN05449.1|BJM02_04150|TGc domain-containing protein	0	2	0	0	0	0	0	0	0	0	0	0	0	0	0	0	0	0	0	0	0	0	0	0	2	0	0	0	0	0	0	0	0	0	0	0
Rv0791c|AJW48409.1|UB21_04180|ARN05450.1|BJM02_04155|Conserved protein	26	26	21	24	7	3	2	4	0	1	0	1	1	1	1	0	9	5	7	7	1	0	0	0	10	7	9	8	0	4	0	1	1	1	0	0
Rv0792c|AJW48410.1|UB21_04185|ARN05451.1|BJM02_04160|Probable transcriptional regulatory protein (Probably GntR-family)	0	0	0	0	0	0	0	0	0	0	0	0	2	0	0	0	0	0	0	0	0	0	0	0	0	0	1	0	0	0	0	2	0	0	0	0
Rv0793|AJW48411.1|UB21_04190|ARN05452.1|BJM02_04165|Putative monooxygenase Rv0793 (EC 1.-.-.-)	0	0	0	0	0	0	0	0	0	0	0	2	0	0	0	0	0	0	0	0	0	0	0	0	0	0	0	0	0	0	0	0	0	0	0	0
Rv0794c|AJW48412.1|UB21_04195|ARN05453.1|BJM02_04170|Probable oxidoreductase	0	0	0	0	0	0	0	0	0	0	0	0	0	0	0	0	0	0	0	0	0	0	0	0	0	2	0	0	0	0	0	2	0	0	0	0
Rv0797|AJW48416.1|UB21_04215|ARN05456.1|BJM02_04190|Putative transposase for insertion sequence element IS1547	0	0	0	0	0	0	0	0	0	0	0	0	0	0	0	0	0	0	0	0	0	0	0	0	0	0	0	0	0	0	0	0	0	0	0	0
Rv0798c|AJW48417.1|UB21_04220|ARN05457.1|BJM02_04195|29 kDa antigen CFP29	0	0	0	0	0	0	0	0	0	2	0	0	0	0	0	0	0	0	0	0	0	0	0	0	0	0	0	0	0	0	0	0	0	0	1	0
Rv0799c|AJW51126.1|UB21_04225|ARN08291.1|BJM02_04200|Conserved protein	0	0	0	0	0	0	0	0	0	0	0	0	0	0	0	0	0	0	0	0	0	0	0	0	0	0	0	0	0	0	0	0	0	0	1	0
Rv0800|AJW48418.1|UB21_04230|ARN05458.1|BJM02_04205|Probable M18 family aminopeptidase 2 (EC 3.4.11.-)	0	0	0	0	0	2	0	2	0	0	0	0	0	0	0	0	2	0	1	1	0	1	0	0	1	0	0	2	0	0	2	0	1	0	1	0
Rv0801|AJW48419.1|UB21_04235|ARN05459.1|BJM02_04210|Conserved protein	2	0	2	2	0	0	0	0	0	0	0	0	0	0	0	0	0	0	0	0	0	0	0	0	0	0	0	0	0	0	0	0	1	0	0	1
Rv0802c|AJW48420.1|UB21_04240|ARN05460.1|BJM02_04215|Putative succinyl-CoA transferase Rv0802c (EC 2.8.3.-)	0	0	0	0	0	0	0	0	0	0	0	0	0	0	0	0	0	0	0	0	0	0	0	0	0	0	0	0	0	0	0	0	0	0	0	0
Rv0803|AJW48421.1|UB21_04245|ARN05461.1|BJM02_04220|Phosphoribosylformylglycinamidine synthase subunit PurL (FGAM synthase) (EC 6.3.5.3) (Formylglycinamide ribonucleotide amidotransferase subunit II) (FGAR amidotransferase II) (FGAR-AT II) (Glutamine amidotransferase PurL) (Phosphoribosylformylglycinamidine synthase subunit II)	0	0	0	0	0	0	0	0	0	0	0	0	0	0	0	0	0	0	1	0	0	0	0	4	0	0	0	0	0	0	0	0	0	0	0	0
Rv0804|AJW48422.1|UB21_04250|ARN05462.1|BJM02_04225|Uncharacterized protein	0	2	0	0	0	0	1	0	0	0	0	0	0	0	0	0	0	1	0	1	2	1	0	0	2	4	1	5	2	0	0	0	0	0	0	0
Rv0805|AJW48423.1|UB21_04255|ARN05463.1|BJM02_04230|3',5'-cyclic adenosine monophosphate phosphodiesterase CpdA (3',5'-cyclic AMP phosphodiesterase) (cAMP phosphodiesterase) (EC 3.1.4.53)	0	0	2	0	0	0	0	1	0	0	0	0	0	2	0	0	0	0	0	0	0	4	0	0	0	2	0	2	0	0	2	2	0	0	0	0
Rv0806c|AJW48424.1|UB21_04260|ARN05464.1|BJM02_04235|Exopolysaccharide phosphotransferase CpsY (EC 2.7.-.-) (Stealth protein CpsY)	0	0	0	0	0	0	0	0	0	0	0	0	0	0	0	0	0	0	0	0	2	0	0	2	0	0	0	0	0	0	0	0	2	0	0	0
Rv0807|AJW48425.1|UB21_04265|ARN05465.1|BJM02_04240|SCP_3 domain-containing protein	0	0	0	0	0	0	0	0	0	0	0	0	0	0	0	0	0	0	0	0	0	0	0	0	0	0	0	0	0	0	0	0	0	0	0	0
Rv0808|AJW51127.1|UB21_04270|ARN08293.1|BJM02_04245|Amidophosphoribosyltransferase (ATase) (EC 2.4.2.14) (Glutamine phosphoribosylpyrophosphate amidotransferase) (GPATase)	0	0	0	0	0	0	0	0	0	0	0	0	0	0	0	2	0	0	0	0	2	0	0	0	0	0	0	0	0	0	0	0	0	2	0	0
Rv0809|AJW48426.1|UB21_04275|ARN05466.1|BJM02_04250|Phosphoribosylformylglycinamidine cyclo-ligase (EC 6.3.3.1) (AIR synthase) (AIRS) (Phosphoribosyl-aminoimidazole synthetase)	0	0	0	0	0	0	0	0	0	0	0	0	2	0	0	4	0	2	0	0	0	0	2	0	0	0	0	2	0	0	2	0	0	0	0	0
Rv0810c|AJW48427.1|UB21_04280|ARN05467.1|BJM02_04255|Uncharacterized protein	0	0	0	0	0	0	0	0	0	0	0	0	0	0	0	0	0	0	0	0	0	0	0	0	0	0	0	0	0	0	0	0	0	0	0	2
Rv0811c|AJW48428.1|UB21_04285|ARN05468.1|BJM02_04260|Conserved protein	0	0	0	0	0	0	0	0	0	0	0	0	0	0	0	0	0	0	0	0	0	2	0	0	0	0	0	0	0	0	0	0	0	0	1	0
Rv0812|AJW48429.1|UB21_04290|ARN05469.1|BJM02_04265|Probable amino acid aminotransferase	0	0	0	0	0	0	0	0	0	0	0	0	0	0	0	0	0	0	0	0	0	0	0	0	0	0	0	0	0	0	0	0	0	0	0	0
Rv0813c|AJW48430.1|UB21_04295|ARN05470.1|BJM02_04270|UPF0678 fatty acid-binding protein-like protein Rv0813c	0	0	0	0	0	0	0	0	0	0	0	0	0	0	0	0	2	2	0	0	0	0	0	0	0	0	0	0	0	2	0	0	0	0	0	0
Rv0814c|AJW48432.1|UB21_04305|ARN05471.1|BJM02_04275|Uncharacterized protein Rv0814c	0	0	0	0	0	0	1	0	0	0	0	0	0	0	0	1	0	0	0	0	0	0	0	0	0	0	0	0	0	0	0	0	0	0	0	0
Rv0816c|AJW48433.1|UB21_04315|ARN05472.1|BJM02_04285|Probable thioredoxin ThiX	0	0	0	0	0	0	0	0	0	0	0	0	0	0	0	0	0	0	0	0	0	0	0	0	0	0	0	0	0	0	0	0	0	0	0	0
Rv0817c|AJW48434.1|UB21_04320|ARN05473.1|BJM02_04290|Probable conserved exported protein	0	0	0	0	0	0	0	0	0	1	0	0	0	0	0	0	0	0	1	0	0	0	0	0	0	0	0	0	0	0	0	0	0	0	0	0
Rv0818|AJW51129.1|UB21_04325|ARN08295.1|BJM02_04295|Transcriptional regulatory protein	0	0	0	0	0	2	0	0	0	0	0	0	0	0	0	0	0	0	0	0	0	2	0	0	0	0	0	0	0	0	0	0	0	0	0	0
Rv0819|AJW48435.1|UB21_04330|ARN05474.1|BJM02_04300|Mycothiol acetyltransferase (MSH acetyltransferase) (EC 2.3.1.189) (Mycothiol synthase)	0	0	0	0	0	0	0	0	0	0	4	0	0	0	0	0	0	0	0	0	1	0	0	0	0	0	0	0	0	0	0	0	0	0	0	0
Rv0821c|AJW48437.1|UB21_04340|ARN05476.1|BJM02_04310|Phosphate-specific transport system accessory protein PhoU homolog 2 (Pst system accessory protein PhoU homolog 2)	0	2	2	0	0	0	0	0	0	0	0	0	0	0	2	0	1	0	0	0	2	0	0	0	0	0	0	0	0	1	0	0	2	0	0	0
Rv0822c|AJW48438.1|UB21_04345|ARN05477.1|BJM02_04315|Conserved protein	0	0	0	0	0	0	0	0	0	0	2	0	0	2	0	2	0	0	0	0	0	0	0	0	2	0	0	0	0	0	0	0	0	0	0	0
Rv0823c|AJW51130.1|UB21_04350|ARN08296.1|BJM02_04320|Probable tRNA-dihydrouridine synthase (EC 1.3.1.-)	28	23	27	29	6	2	5	5	5	1	1	3	1	2	3	2	12	17	18	21	0	5	3	1	11	18	19	21	3	8	10	3	1	1	4	1
Rv0824c|AJW48439.1|UB21_04355|ARN05478.1|BJM02_04325|Putative acyl-[acyl-carrier-protein] desaturase DesA1 (Putative acyl-ACP desaturase DesA1) (EC 1.14.19.-)	0	0	0	0	0	0	0	0	0	0	0	2	0	2	2	0	0	2	0	2	2	0	0	0	2	2	1	5	4	0	0	0	6	6	2	0
Rv0825c|AJW48440.1|UB21_04360|ARN05479.1|BJM02_04330|Conserved protein	0	0	0	0	0	0	0	0	0	0	0	0	0	0	0	0	0	0	0	0	0	0	0	0	0	0	0	0	0	0	0	0	0	0	0	0
Rv0826|AJW51131.1|UB21_04365|ARN08297.1|BJM02_04335|DUF2236 domain-containing protein	0	0	0	2	0	0	0	0	0	0	4	0	2	0	2	0	0	0	0	2	0	0	0	0	0	0	0	0	2	0	0	0	0	0	0	2
Rv0827c|AJW51132.1|UB21_04370|ARN05480.1|BJM02_04340|HTH-type transcriptional regulator KmtR	0	0	0	0	0	0	0	0	0	0	0	0	0	0	0	0	0	0	0	0	0	0	0	0	0	1	0	0	0	0	0	0	0	0	0	0
Rv0828c|AJW48441.1|UB21_04375|ARN08298.1|BJM02_04345|Possible deaminase	0	0	0	0	0	0	0	0	0	0	0	0	0	0	0	0	0	0	0	0	0	0	0	0	0	0	0	0	0	0	0	0	0	0	0	0
Rv0829|AJW48442.1|UB21_04380|ARN08299.1|BJM02_04350|Possible transposase	0	0	0	0	0	0	0	0	0	0	0	0	0	0	0	0	0	0	0	0	0	0	0	0	0	0	0	0	0	0	0	0	0	0	0	0
Rv0830|AJW48443.1|UB21_04385|ARN05481.1|BJM02_04355|Putative S-adenosyl-L-methionine-dependent methyltransferase Rv0830 (EC 2.1.1.-)	0	0	0	0	0	0	0	0	0	0	0	0	0	0	0	0	0	0	0	0	0	0	0	1	0	0	0	0	0	0	0	0	0	0	0	0
Rv0831c|AJW48444.1|UB21_04390|ARN05482.1|BJM02_04360|Conserved protein	0	0	0	1	0	0	0	0	0	1	0	0	0	0	0	0	0	0	0	2	0	0	0	0	0	0	0	0	0	0	0	0	0	0	2	0
Rv0835|AJW48445.1|UB21_04435|ARN05485.1|BJM02_04410|Possible lipoprotein LpqQ	0	0	0	0	0	0	0	0	0	0	0	0	0	0	0	0	0	0	0	0	0	0	0	0	0	0	0	0	0	0	0	0	0	0	0	2
Rv0836c|AJW48446.1|UB21_04440|ARN05486.1|BJM02_04415|Uncharacterized protein	0	0	0	0	0	0	0	0	0	0	0	0	0	0	0	0	0	0	0	0	0	0	0	0	0	0	0	0	0	0	0	0	0	0	0	0
Rv0837c|AJW48447.1|UB21_04445|ARN05487.1|BJM02_04420|Uncharacterized protein	0	0	0	0	0	0	0	0	0	0	0	0	0	0	0	0	0	0	0	0	0	0	0	0	0	0	0	0	0	0	0	0	0	0	0	0
Rv0838|AJW48448.1|UB21_04455|ARN05488.1|BJM02_04425|D-alanyl-D-alanine dipeptidase (D-Ala-D-Ala dipeptidase) (EC 3.4.13.22)	0	0	0	0	0	0	0	0	0	0	0	0	0	0	1	0	0	0	0	0	0	0	0	0	0	0	0	0	0	0	0	0	0	0	0	0
Rv0839|AJW48449.1|UB21_04460|ARN05489.1|BJM02_04430|Methyltranfer_dom domain-containing protein	0	0	0	0	0	2	0	0	0	0	0	0	0	0	0	0	0	2	0	0	0	0	0	0	0	0	0	0	0	0	0	0	0	0	0	0
Rv0840c|AJW48450.1|UB21_04465|ARN05490.1|BJM02_04435|Probable proline iminopeptidase Pip (Prolyl aminopeptidase) (Pap)	0	0	0	0	0	0	0	0	0	2	0	0	0	0	0	0	0	0	0	0	0	0	0	0	0	0	0	0	0	0	0	0	0	0	0	0
Rv0841|AJW48452.1|UB21_04475|ARN05491.1|BJM02_04440|Probable conserved transmembrane protein	0	0	0	0	0	0	0	0	0	0	0	0	0	0	0	0	0	0	0	0	0	0	0	0	0	0	0	0	0	0	0	0	0	0	0	0
Rv0842|AJW48453.1|UB21_04480|ARN05492.1|BJM02_04445|Probable conserved integral membrane protein	0	0	0	0	0	0	0	0	0	0	0	0	0	0	0	0	0	0	0	0	0	0	0	0	0	0	0	0	0	0	0	0	0	0	0	2
Rv0843|AJW48454.1|UB21_04485|ARN05493.1|BJM02_04450|Probable dehydrogenase	0	0	0	0	0	0	0	0	1	0	0	0	0	0	0	0	0	0	0	0	0	0	0	0	0	0	0	0	0	0	0	0	0	0	0	0
Rv0844c|AJW48455.1|UB21_04490|ARN05494.1|BJM02_04455|Probable transcriptional regulatory protein NarL	0	0	0	0	0	0	0	0	0	0	0	0	0	0	0	0	0	0	0	0	0	0	0	0	0	0	0	0	0	0	0	0	0	0	0	0
Rv0845|AJW48456.1|UB21_04495|ARN08301.1|BJM02_04460|Sensor histidine kinase NarS (EC 2.7.13.3)	0	0	2	0	0	0	0	0	0	0	0	0	0	0	0	0	0	0	0	0	0	0	0	0	0	0	0	0	0	0	0	0	0	0	0	0
Rv0846c|AJW48457.1|UB21_04500|ARN05495.1|BJM02_04465|Multicopper oxidase MmcO (EC 1.16.3.1) (Mycobacterium multicopper oxidase)	1	0	0	0	0	0	0	0	0	0	0	0	0	0	0	0	0	0	0	1	0	0	0	0	0	0	0	0	0	0	0	0	0	0	0	0
Rv0847|AJW51135.1|UB21_04505|ARN08302.1|BJM02_04470|Lipoprotein LpqS	1	0	0	0	6	7	3	3	0	0	0	0	3	1	0	1	18	17	10	22	4	12	7	14	27	28	24	26	5	3	3	5	5	6	1	4
Rv0850|AJW51136.1|UB21_04520|ARN08304.1|BJM02_04485|Putative transposase	0	0	0	0	0	0	0	0	0	0	0	0	0	0	0	0	0	0	0	0	0	0	0	0	0	0	0	0	0	0	0	0	0	0	0	0
Rv0851c|AJW48458.1|UB21_04525|ARN05497.1|BJM02_04490|Probable short-chain type dehydrogenase/reductase	0	0	0	0	0	0	0	0	0	0	0	0	0	0	0	0	0	0	0	0	0	0	0	0	0	0	0	0	0	0	0	0	0	0	0	0
Rv0854|AJW48459.1|UB21_04535|ARN05499.1|BJM02_04505|Conserved protein	0	0	0	0	0	0	0	0	0	0	0	0	0	1	0	0	0	0	0	0	0	0	0	0	0	0	2	0	0	0	0	0	0	0	0	0
Rv0855|AJW48460.1|UB21_04540|ARN05500.1|BJM02_04510|Probable fatty-acid-CoA racemase Far	0	0	0	0	0	0	0	0	1	0	0	0	0	0	1	0	0	0	0	0	0	0	0	0	0	0	0	0	0	0	0	0	0	0	0	0
Rv0856|AJW48461.1|UB21_04545|ARN05501.1|BJM02_04515|Polyketide_cyc domain-containing protein	0	0	2	0	0	0	0	0	0	0	0	0	0	0	1	0	0	0	0	2	0	0	0	0	0	0	0	0	0	0	0	0	0	0	0	0
Rv0857|AJW48462.1|UB21_04550|ARN05502.1|BJM02_04520|Uncharacterized protein	0	0	0	0	0	0	0	0	0	0	0	0	0	0	0	0	0	0	0	0	0	0	0	0	0	0	0	0	0	0	0	0	0	0	0	0
Rv0858c|AJW48463.1|UB21_04555|ARN05503.1|BJM02_04525|Probable N-succinyldiaminopimelate aminotransferase DapC (DAP-AT) (EC 2.6.1.17)	0	0	0	0	0	0	0	0	0	0	0	0	0	0	2	0	0	0	0	0	0	0	0	0	0	0	0	0	0	0	0	0	0	0	0	0
Rv0859|AJW48464.1|UB21_04560|ARN05504.1|BJM02_04530|Putative acyltransferase Rv0859 (EC 2.3.1.-)	1	0	0	0	0	0	1	0	0	0	0	0	0	0	0	0	0	0	0	0	1	0	0	0	0	0	0	0	0	0	0	0	2	0	0	0
Rv0860|AJW48465.1|UB21_04565|ARN05505.1|BJM02_04535|3-hydroxyacyl-CoA dehydrogenase (EC 1.1.1.35)	2	2	0	0	0	0	0	2	0	0	0	0	2	0	0	0	0	0	2	2	0	0	0	0	0	0	2	2	0	0	4	2	0	0	4	0
Rv0861c|AJW48466.1|UB21_04570|ARN05506.1|BJM02_04540|DNA helicase (EC 3.6.4.12)	0	0	0	0	0	0	0	0	0	0	0	0	0	0	2	0	0	0	0	0	0	0	0	0	0	0	0	0	0	0	0	2	0	0	0	0
Rv0862c|AJW48467.1|UB21_04575|ARN05507.1|BJM02_04545|Conserved protein	0	0	0	0	0	0	0	0	0	0	0	0	0	0	0	0	0	0	0	0	0	0	0	0	0	0	0	0	0	0	0	0	0	0	0	0
Rv0863|AJW51137.1|UB21_04580|ARN08306.1|BJM02_04550|Uncharacterized protein	0	0	0	0	0	0	0	0	0	0	0	0	0	2	0	0	0	0	2	0	0	0	2	0	0	0	0	0	0	0	0	0	0	0	0	0
Rv0864|AJW48468.1|UB21_04585|ARN05508.1|BJM02_04555|Cyclic pyranopterin monophosphate synthase 2 (EC 4.6.1.17) (Molybdenum cofactor biosynthesis protein C 2)	0	0	0	0	0	0	0	0	0	1	0	0	0	0	0	0	0	0	0	0	0	0	0	0	0	0	0	0	0	0	0	0	0	0	0	0
Rv0865|AJW48469.1|UB21_04590|ARN05509.1|BJM02_04560|Probable molybdopterin biosynthesis Mog protein	0	0	0	2	0	0	0	0	0	0	0	0	0	0	0	0	0	0	0	0	0	0	0	0	0	0	0	0	0	0	0	0	0	0	0	0
Rv0866|AJW48470.1|UB21_04595|ARN05510.1|BJM02_04565|Molybdopterin synthase catalytic subunit 2 (EC 2.8.1.12) (MPT synthase subunit 2 2) (Molybdenum cofactor biosynthesis protein E 2) (Molybdopterin-converting factor large subunit 2) (Molybdopterin-converting factor subunit 2 2)	0	0	0	0	0	0	0	0	0	0	0	1	0	0	0	0	0	0	0	0	0	0	0	0	0	0	0	0	0	0	0	0	0	0	0	0
Rv0867c|AJW48471.1|UB21_04600|*|BJM02_04570|Resuscitation-promoting factor RpfA (EC 3.-.-.-)	207	210	208	210	500	491	621	530	1299	1168	1427	1347	757	718	973	802	1158	1045	1142	1149	5800	5386	6100	6146	732	642	712	703	3187	2988	3315	3402	1679	1500	1801	1681
Rv0868c|AJW48472.1|UB21_04605|ARN05511.1|BJM02_04575|Probable molybdenum cofactor biosynthesis protein D 2 MoaD2 (Molybdopterin converting factor small subunit) (Molybdopterin [MPT] converting factor, subunit 1)	0	0	0	0	0	0	0	0	0	0	0	0	0	0	0	0	0	0	0	0	0	0	0	0	0	0	0	0	0	0	0	0	0	0	0	0
Rv0869c|AJW48473.1|UB21_04610|ARN05512.1|BJM02_04580|GTP 3',8-cyclase 2 (EC 4.1.99.22) (Molybdenum cofactor biosynthesis protein A 2)	0	0	0	0	2	0	0	0	0	0	0	0	0	0	0	0	0	0	0	0	0	0	0	0	0	0	0	0	0	0	0	0	0	0	0	0
Rv0870c|AJW48474.1|UB21_04615|ARN05513.1|BJM02_04585|Possible conserved integral membrane protein	1	1	4	2	0	0	0	0	1	0	0	0	1	0	0	0	1	0	1	1	0	0	0	0	0	1	0	0	0	0	0	0	0	0	0	1
Rv0871|AJW48475.1|UB21_04620|ARN05514.1|BJM02_04590|Probable cold shock-like protein B CspB	0	0	0	0	0	0	0	0	0	0	0	0	0	0	0	0	0	0	0	0	0	0	0	0	0	0	1	0	0	0	0	0	0	0	0	0
Rv0873|AJW48478.1|UB21_04635|ARN05515.1|BJM02_04600|Probable acyl-CoA dehydrogenase FadE10 (EC 1.3.-.-)	0	0	2	3	0	2	1	1	0	0	0	1	1	0	0	0	0	0	2	0	0	1	2	0	0	0	2	0	2	0	0	0	0	0	0	0
Rv0874c|AJW48479.1|UB21_04640|ARN05516.1|BJM02_04605|Uncharacterized protein Rv0874c	0	0	0	0	0	0	0	0	0	0	0	0	0	0	0	0	0	0	0	0	0	0	0	0	0	1	0	2	0	2	0	0	0	0	0	0
Rv0875c|AJW48480.1|UB21_04645|ARN05517.1|BJM02_04610|Uncharacterized protein Rv0875c	0	0	0	0	0	0	0	0	0	0	0	0	0	0	0	0	0	0	0	0	0	0	0	0	0	0	0	0	0	0	0	0	0	0	0	1
Rv0876c|AJW48481.1|UB21_04650|ARN05518.1|BJM02_04615|Uncharacterized protein Rv0876c	0	0	0	0	0	0	0	0	0	0	0	0	0	0	0	0	0	0	0	0	0	0	0	0	0	0	0	2	0	0	0	0	0	0	0	0
Rv0877|AJW48482.1|UB21_04655|ARN05519.1|BJM02_04620|Uncharacterized protein Rv0877	0	0	0	0	0	0	0	0	0	0	0	2	0	0	0	0	0	0	0	0	0	0	2	0	0	0	0	0	2	2	0	2	0	2	0	2
Rv0879c|AJW48483.1|UB21_04665|ARN05521.1|BJM02_04630|Uncharacterized protein Rv0879c	0	0	0	0	0	0	0	0	0	0	0	0	0	0	0	0	0	0	0	0	0	0	0	0	0	0	0	0	0	0	0	0	0	0	0	0
Rv0880|AJW48484.1|UB21_04670|ARN05522.1|BJM02_04635|Uncharacterized HTH-type transcriptional regulator Rv0880	0	0	0	0	0	0	0	0	0	0	0	0	0	0	0	0	0	0	0	0	0	0	0	0	0	0	0	0	0	0	0	0	0	0	0	0
Rv0881|AJW48485.1|UB21_04675|ARN05523.1|BJM02_04640|Uncharacterized tRNA/rRNA methyltransferase Rv0881 (EC 2.1.1.-)	0	0	0	0	0	0	0	0	0	0	0	0	0	0	0	0	0	0	0	0	0	0	0	0	0	0	0	0	0	0	0	0	0	0	0	0
Rv0882|AJW48486.1|UB21_04680|*|BJM02_04645|Uncharacterized protein Rv0882	0	0	0	0	0	0	0	0	0	0	0	0	0	0	0	0	0	0	2	0	0	0	0	0	0	0	0	0	0	0	0	0	0	0	0	0
Rv0883c|AJW48487.1|UB21_04685|ARN05524.1|BJM02_04650|Uncharacterized protein Rv0883c	0	0	0	0	0	0	0	0	0	0	0	0	0	0	0	0	0	0	0	0	0	0	0	0	0	0	0	0	0	0	0	0	0	0	0	1
Rv0884c|AJW48488.1|UB21_04690|ARN05525.1|BJM02_04655|Phosphoserine aminotransferase (EC 2.6.1.52) (Phosphohydroxythreonine aminotransferase) (PSAT)	0	0	0	0	0	0	0	0	0	0	0	0	0	0	0	0	0	0	0	0	0	2	4	0	0	2	0	0	0	0	2	0	0	2	0	0
Rv0885|AJW48489.1|UB21_04695|ARN05526.1|BJM02_04660|Uncharacterized protein Rv0885	0	0	0	0	0	0	0	0	0	0	0	0	0	0	0	0	0	0	0	0	0	0	0	0	0	0	0	0	0	0	0	0	0	0	0	0
Rv0886|AJW48490.1|UB21_04700|ARN05527.1|BJM02_04665|Probable ferredoxin/ferredoxin--NADP reductase (FNR) (EC 1.18.1.2)	0	0	0	0	0	0	0	0	0	0	0	0	0	0	0	0	0	0	0	0	0	0	0	0	0	0	0	0	0	0	0	0	0	0	0	0
Rv0887c|AJW48491.1|UB21_04705|ARN05528.1|BJM02_04670|Uncharacterized protein Rv0887c	0	0	0	0	0	0	0	0	0	0	0	0	0	0	0	0	0	0	0	0	0	0	0	0	0	0	0	0	0	0	0	0	0	0	0	0
Rv0890c|AJW48492.1|UB21_04720|ARN05530.1|BJM02_04685|Putative HTH-type transcriptional regulator Rv0890c	0	0	0	0	0	0	2	0	0	0	0	0	0	0	0	0	0	0	0	0	0	0	0	0	0	0	0	0	0	0	0	0	0	0	0	0
Rv0891c|AJW51138.1|UB21_04725|ARN08307.1|BJM02_04690|Uncharacterized protein Rv0891c	0	0	0	0	0	0	0	0	2	0	0	2	0	0	0	0	0	0	0	0	0	0	0	0	0	0	0	0	0	0	0	0	0	0	0	0
Rv0892|AJW51139.1|UB21_04735|ARN08308.1|BJM02_04700|Uncharacterized monooxygenase Rv0892 (EC 1.14.13.-)	0	0	0	0	0	0	0	0	0	0	2	0	0	0	0	0	0	0	0	0	0	0	0	0	0	0	0	0	0	0	0	0	0	0	0	0
Rv0893c|AJW48494.1|UB21_04740|ARN05532.1|BJM02_04705|Putative S-adenosyl-L-methionine-dependent methyltransferase Rv0893c (EC 2.1.1.-)	0	0	0	0	0	0	0	0	0	0	0	0	0	0	0	0	0	0	0	0	0	0	0	0	0	0	0	0	0	0	0	0	0	0	0	2
Rv0894|AJW48495.1|UB21_04745|ARN05533.1|BJM02_04710|Uncharacterized protein Rv0894	0	0	0	0	0	0	0	0	0	0	0	1	0	0	0	0	0	0	0	0	0	0	0	0	0	0	0	0	0	0	0	0	0	0	0	0
Rv0895|AJW51140.1|UB21_04750|ARN08309.1|BJM02_04715|Putative diacyglycerol O-acyltransferase Rv0895 (EC 2.3.1.20) (Putative triacylglycerol synthase Rv0895)	0	1	0	0	0	0	0	0	0	0	0	0	0	0	0	0	0	0	2	0	0	0	0	0	0	0	0	0	0	0	0	0	0	0	0	0
Rv0896|AJW48496.1|UB21_04755|ARN05534.1|BJM02_04720|Citrate synthase 1 (EC 2.3.3.16)	0	0	2	0	0	0	0	0	0	0	0	0	0	0	2	2	0	0	1	2	4	2	0	0	0	0	2	0	2	0	0	0	0	2	0	0
Rv0897c|AJW48497.1|UB21_04760|ARN05535.1|BJM02_04725|Uncharacterized protein Rv0897c	0	0	0	0	0	0	0	0	0	0	0	0	0	0	0	0	0	0	0	0	0	0	0	0	0	0	0	0	2	0	2	0	0	0	0	0
Rv0898c|AJW48498.1|UB21_04765|ARN05536.1|BJM02_04730|Uncharacterized protein Rv0898c	0	0	0	0	0	0	0	0	0	0	0	0	0	0	0	0	0	0	0	0	0	0	0	0	0	0	0	0	0	0	0	0	0	0	0	0
Rv0899|AJW48499.1|UB21_04770|ARN05537.1|BJM02_04735|Peptidoglycan-binding protein ArfA (Outer membrane porin A) (Outer membrane protein A) (OmpATb) (Outer membrane protein ArfA)	0	0	0	0	0	0	0	0	0	0	0	0	2	0	0	0	0	2	0	0	0	0	0	0	0	0	0	0	0	0	0	0	0	0	0	0
Rv0901|AJW48500.1|UB21_04780|ARN05539.1|BJM02_04745|Uncharacterized membrane protein ArfC	0	0	0	0	0	0	0	0	0	0	0	0	0	0	0	0	0	0	0	0	0	0	0	0	0	0	0	0	0	0	0	0	0	0	0	0
Rv0902c|AJW48501.1|UB21_04785|ARN05540.1|BJM02_04750|Sensor-type histidine kinase PrrB (EC 2.7.13.3)	0	0	0	0	0	0	0	0	0	0	0	0	0	0	2	0	0	0	0	0	0	0	0	0	0	0	2	0	0	0	0	0	0	0	0	0
Rv0903c|AJW51141.1|UB21_04790|ARN05541.1|BJM02_04755|Transcriptional regulatory protein PrrA	0	0	0	0	0	0	0	0	0	0	0	0	0	0	0	0	0	0	0	0	0	0	0	0	0	0	0	0	0	0	0	0	0	0	0	0
Rv0904c|AJW48502.1|UB21_04795|ARN05542.1|BJM02_04760|Putative acetyl-coenzyme A carboxylase carboxyl transferase subunit beta (ACCase beta chain) (EC 6.4.1.2)	0	1	0	0	0	0	0	0	0	0	0	0	0	0	0	0	0	0	0	0	0	0	0	0	0	1	0	0	0	0	0	1	0	0	0	0
Rv0905|AJW48503.1|UB21_04800|ARN05543.1|BJM02_04765|Probable enoyl-CoA hydratase echA6 (EC 4.2.1.17)	0	0	0	0	0	0	0	0	0	0	0	0	0	0	0	0	0	0	0	0	0	0	0	0	0	0	0	0	0	0	0	1	0	0	0	0
Rv0906|AJW51142.1|UB21_04805|ARN08310.1|BJM02_04770|Uncharacterized protein Rv0906	0	0	0	0	0	0	0	0	0	0	0	0	0	0	0	0	0	0	0	0	0	0	0	2	0	0	0	0	1	0	0	0	0	0	0	0
Rv0907|AJW48504.1|UB21_04810|ARN05544.1|BJM02_04775|Conserved protein	0	0	0	0	0	0	0	0	0	0	0	0	0	0	0	0	0	0	0	0	0	0	0	0	0	2	0	0	0	0	0	0	0	0	0	0
Rv0908|AJW48505.1|UB21_04815|ARN05545.1|BJM02_04780|Calcium-transporting ATPase CtpE (EC 7.2.2.10)	0	0	0	0	0	0	0	0	0	0	0	0	0	0	0	0	0	0	0	0	0	0	0	0	0	0	0	2	2	0	2	0	0	0	0	0
Rv0909|AJW48506.1|UB21_04820|ARN05546.1|BJM02_04785|Antitoxin Rv0909	0	0	0	0	0	0	0	0	0	0	0	0	0	0	0	0	0	0	0	0	0	0	0	0	0	0	0	0	2	0	1	0	0	0	0	0
Rv0910|AJW48507.1|UB21_04825|ARN05547.1|BJM02_04790|Toxin Rv0910	0	0	0	0	0	0	0	0	0	0	0	0	0	0	0	0	0	2	2	0	0	0	0	0	0	0	0	0	2	0	0	0	0	0	0	0
Rv0911|AJW48508.1|UB21_04830|ARN05548.1|BJM02_04795|Conserved protein	0	0	0	0	0	0	0	0	0	0	0	0	0	0	0	0	0	0	0	0	0	0	0	0	0	0	0	0	0	0	0	0	0	0	0	0
Rv0912|AJW51143.1|UB21_04835|ARN08311.1|BJM02_04800|Probable conserved transmembrane protein	0	0	0	0	0	0	0	0	0	0	0	0	0	0	0	0	0	0	0	0	0	0	0	0	0	0	0	0	0	0	0	0	0	0	0	0
Rv0913c|AJW48510.1|UB21_04845|ARN05550.1|BJM02_04810|Dioxygenase (EC 1.13.11.-)	0	0	0	0	0	0	0	0	0	0	0	0	0	0	0	0	0	0	0	0	0	0	0	0	0	0	0	0	0	0	0	0	0	0	0	0
Rv0914c|AJW48511.1|UB21_04850|ARN05551.1|BJM02_04815|Possible lipid carrier protein or keto acyl-CoA thiolase	0	0	0	0	0	0	0	0	0	0	0	0	0	0	0	0	0	0	0	0	0	0	0	0	2	0	0	0	0	0	0	0	0	0	0	0
Rv0915c|AJW48512.1|UB21_04855|ARN05552.1|BJM02_04820|Uncharacterized PPE family protein PPE14	1	0	0	0	0	0	0	0	0	0	0	0	0	0	0	0	0	0	0	0	0	0	0	0	0	0	0	0	0	0	0	0	0	0	0	0
Rv0916c|AJW48513.1|UB21_04860|ARN05553.1|BJM02_04825|PE family protein PE7	0	0	0	0	0	0	0	0	0	0	0	0	0	0	0	0	0	0	0	1	0	0	0	0	1	0	1	0	0	0	0	0	0	0	0	0
Rv0918|AJW48515.1|UB21_04875|ARN05556.1|BJM02_04840|Conserved protein	0	0	0	0	0	0	0	0	0	0	0	0	0	0	0	0	0	0	0	0	0	0	0	0	0	0	0	0	0	0	0	0	0	0	0	0
Rv0919|AJW48516.1|UB21_04880|ARN05557.1|BJM02_04845|GCN5-related N-acetyltransferase	0	0	0	0	0	0	0	0	0	0	0	0	1	0	0	0	0	2	0	0	0	0	0	0	0	0	0	0	0	0	0	0	0	0	0	0
Rv0920c|AJW48517.1|UB21_04890|ARN05558.1|BJM02_04855|Mutator family transposase	0	0	0	0	0	0	0	0	0	0	0	0	0	0	0	0	0	0	0	0	0	0	0	0	0	0	0	0	0	0	0	0	0	0	0	0
Rv0921|AJW48518.1|UB21_04895|ARN05559.1|BJM02_04860|Possible resolvase	0	0	0	0	0	0	0	0	0	0	0	0	0	0	0	0	1	0	0	0	0	0	0	2	0	0	0	0	0	0	0	0	0	0	0	0
Rv0922|AJW48519.1|UB21_04900|ARN05560.1|BJM02_04865|Possible transposase	0	0	0	0	0	0	0	0	0	0	0	0	0	0	0	0	2	0	0	2	0	0	0	2	0	2	0	0	0	0	1	0	0	6	0	2
Rv0924c|AJW51144.1|UB21_04910|ARN08312.1|BJM02_04875|Divalent metal cation transporter MntH (Mramp)	0	0	0	0	0	0	0	0	0	0	0	0	0	0	0	0	0	0	0	0	0	0	0	0	0	0	0	0	0	0	0	0	0	0	0	0
Rv0925c|AJW48520.1|UB21_04915|ARN05562.1|BJM02_04880|Conserved protein	0	0	0	0	0	0	0	0	0	0	0	0	0	0	0	0	0	0	0	0	0	0	0	0	0	0	0	2	0	0	0	0	0	0	0	0
Rv0926c|AJW48521.1|UB21_04920|ARN05563.1|BJM02_04885|Uncharacterized protein	0	0	0	0	0	0	0	0	0	0	0	0	0	0	0	0	0	0	0	0	0	0	0	0	0	0	0	0	0	0	0	0	0	2	0	0
Rv0927c|AJW48522.1|UB21_04925|ARN05564.1|BJM02_04890|Uncharacterized oxidoreductase Rv0927c (EC 1.-.-.-)	0	0	0	0	0	0	0	0	0	0	0	2	0	0	0	0	0	0	0	0	0	0	0	2	2	0	0	0	0	0	0	0	0	0	0	0
Rv0928|AJW48523.1|UB21_04930|ARN05565.1|BJM02_04895|Phosphate-binding protein PstS 3 (PBP 3) (PstS-3) (Antigen Ag88)	2	0	0	2	0	0	0	0	0	0	0	0	0	0	0	0	0	0	0	0	0	2	0	0	0	0	0	0	0	0	0	0	2	0	0	0
Rv0929|AJW48524.1|UB21_04935|ARN08313.1|BJM02_04900|Phosphate transport system permease protein PstC 2	0	0	0	0	0	0	0	0	0	0	0	0	0	2	2	0	0	0	0	0	4	0	0	0	0	0	0	0	0	0	0	0	0	0	0	1
Rv0930|AJW48525.1|UB21_04940|ARN05566.1|BJM02_04905|Phosphate transport system permease protein PstA 1	0	0	0	0	0	0	0	0	0	0	0	0	0	2	0	0	1	0	0	0	0	0	2	0	0	0	0	1	3	0	0	2	0	2	0	0
Rv0931c|AJW48526.1|UB21_04945|ARN05567.1|BJM02_04910|Serine/threonine-protein kinase PknD (EC 2.7.11.1)	2	0	2	0	0	2	0	0	0	0	2	2	0	0	4	4	0	0	0	0	2	0	2	0	2	0	0	2	0	0	4	2	0	2	2	2
Rv0932c|AJW48527.1|UB21_04950|ARN05568.1|BJM02_04915|Phosphate-binding protein PstS 2 (PBP 2) (PstS-2)	2	0	0	0	0	1	0	0	0	0	0	0	2	2	0	0	0	0	0	0	4	0	0	0	0	0	0	2	0	0	0	0	0	2	0	0
Rv0933|AJW48528.1|UB21_04955|*|BJM02_04920|Phosphate import ATP-binding protein PstB 2 (EC 7.3.2.1) (ABC phosphate transporter 2) (Phosphate-transporting ATPase 2)	0	0	0	1	0	0	0	0	0	0	0	0	0	0	0	0	2	0	0	0	0	0	0	0	0	0	0	0	0	0	0	0	0	0	0	0
Rv0934|AJW48529.1|UB21_04960|ARN05569.1|BJM02_04925|Phosphate-binding protein PstS 1 (PBP 1) (PhoS1) (PstS-1) (38-kDa glycolipoprotein) (38-kDa lipoprotein) (P38) (Antigen Ag78) (Protein antigen B) (Pab)	0	0	1	3	0	0	0	0	0	0	0	0	0	0	2	0	0	0	0	0	0	0	0	0	2	0	1	0	0	0	0	0	0	0	0	0
Rv0936|AJW48530.1|UB21_04970|ARN08315.1|BJM02_04935|Phosphate transport system permease protein PstA 2	0	0	0	0	0	0	0	0	0	0	0	0	0	0	0	0	0	0	0	0	0	0	0	0	0	0	0	0	0	0	0	0	0	0	0	0
Rv0937c|AJW51145.1|UB21_04975|ARN08314.1|BJM02_04940|Non-homologous end joining protein Ku (Mt-Ku)	0	0	1	0	0	0	0	0	0	0	0	0	0	0	0	0	0	0	0	0	0	0	0	0	0	0	0	0	0	0	0	0	0	0	0	0
Rv0938|AJW48531.1|UB21_04980|ARN05571.1|BJM02_04945|Multifunctional non-homologous end joining DNA repair protein LigD (NHEJ DNA repair protein D) (Mt-Lig) (NHEJ DNA polymerase) [Includes: DNA repair polymerase (Pol) (Polymerase/primase); 3'-phosphoesterase (3'-ribonuclease/3'-phosphatase) (PE); DNA ligase (Lig) (EC 6.5.1.1) (Polydeoxyribonucleotide synthase [ATP])]	0	0	0	0	0	0	0	0	0	0	0	0	0	0	2	0	0	0	0	0	0	0	0	0	1	0	0	0	0	0	0	0	0	0	0	0
Rv0940c|AJW48532.1|UB21_04990|ARN05573.1|BJM02_04955|Uncharacterized protein Rv0940c	0	0	0	0	0	0	0	0	0	0	0	0	0	0	0	0	0	0	0	0	0	0	0	0	0	0	0	0	0	0	0	0	0	0	0	0
Rv0941c|AJW51146.1|UB21_04995|ARN08316.1|BJM02_04960|STAS domain-containing protein	0	0	0	0	0	0	0	0	0	0	0	0	0	0	0	0	0	0	0	0	0	0	0	0	0	0	0	0	0	0	0	1	0	0	0	0
Rv0942|AJW48533.1|UB21_05000|ARN05574.1|BJM02_04965|Uncharacterized protein Rv0942	0	0	0	0	0	0	0	0	0	0	0	0	0	0	0	0	0	0	0	0	0	0	0	0	0	0	0	0	0	0	0	0	0	0	0	0
Rv0943c|AJW48534.1|UB21_05005|ARN05575.1|BJM02_04970|Uncharacterized protein Rv0943c	0	0	0	0	0	0	0	0	0	0	0	0	0	0	0	0	0	0	0	0	0	0	0	0	0	0	0	0	0	0	0	0	0	0	0	0
Rv0944|AJW51147.1|UB21_05010|ARN08317.1|BJM02_04975|Uncharacterized formamidopyrimidine-DNA glycosylase-like protein	0	0	0	0	0	0	0	0	0	0	0	0	0	0	0	0	0	0	0	0	0	0	0	0	0	0	0	0	0	0	0	0	0	0	0	0
Rv0945|AJW51148.1|UB21_05015|ARN08318.1|BJM02_04980|Uncharacterized oxidoreductase Rv0945 (EC 1.-.-.-)	0	0	0	0	0	0	0	0	0	0	0	0	0	0	0	0	0	0	0	0	0	0	2	0	0	0	0	0	0	2	0	0	0	0	0	0
Rv0946c|AJW48535.1|UB21_05020|ARN05576.1|BJM02_04985|Glucose-6-phosphate isomerase (GPI) (EC 5.3.1.9) (Phosphoglucose isomerase) (PGI) (Phosphohexose isomerase) (PHI)	0	0	0	0	0	2	0	1	0	0	0	0	0	0	0	0	0	0	0	0	0	0	0	0	0	0	0	0	0	0	0	0	0	0	0	0
Rv0948c|AJW48537.1|UB21_05030|ARN05578.1|BJM02_05000|Intracellular chorismate mutase (CM) (EC 5.4.99.5)	0	0	0	0	0	0	0	0	0	0	0	0	0	0	0	0	0	0	0	0	0	0	0	0	0	0	0	0	0	0	0	0	0	0	0	0
Rv0949|AJW48538.1|UB21_05035|ARN05579.1|BJM02_05005|ATP-dependent DNA helicase UvrD1 (EC 3.6.4.12)	0	0	0	0	1	0	0	0	0	0	0	2	0	0	0	0	0	0	0	0	0	0	0	0	0	0	0	0	0	0	0	0	2	0	0	0
Rv0950c|AJW48539.1|UB21_05040|ARN05580.1|BJM02_05010|Peptidase_M23 domain-containing protein	0	0	0	0	0	2	0	0	0	0	0	0	0	0	0	0	0	0	0	0	0	0	0	0	2	0	0	0	0	0	0	0	0	0	0	2
Rv0951|AJW48540.1|UB21_05045|ARN05581.1|BJM02_05015|Succinate--CoA ligase [ADP-forming] subunit beta (EC 6.2.1.5) (Succinyl-CoA synthetase subunit beta) (SCS-beta)	5	2	0	0	0	0	0	0	0	0	0	0	0	0	2	2	0	0	0	0	0	0	2	0	2	2	0	0	0	0	0	0	0	0	0	0
Rv0952|AJW48541.1|UB21_05050|*|BJM02_05020|Succinate--CoA ligase [ADP-forming] subunit alpha (EC 6.2.1.5) (Succinyl-CoA synthetase subunit alpha) (SCS-alpha)	0	2	0	2	0	0	0	0	0	0	0	0	0	0	0	0	0	0	0	0	0	2	0	0	0	0	0	0	0	0	0	2	0	0	2	0
Rv0953c|AJW48542.1|UB21_05055|ARN05582.1|BJM02_05025|Uncharacterized protein Rv0953c	0	0	0	0	0	0	0	0	0	0	0	0	0	0	0	0	0	0	0	0	0	0	0	0	0	1	0	0	0	0	0	0	0	0	0	0
Rv0954|AJW48543.1|UB21_05060|ARN05583.1|BJM02_05030|34 kDa antigenic protein homolog	0	2	1	0	0	1	0	0	0	0	0	0	0	2	2	0	0	1	0	0	2	0	3	0	2	0	2	2	3	0	0	2	0	0	0	0
Rv0955|AJW48544.1|UB21_05065|ARN05584.1|BJM02_05035|Uncharacterized protein Rv0955	0	0	1	2	0	0	0	0	0	0	0	0	2	2	0	0	0	0	0	0	0	0	0	0	0	0	0	0	0	0	0	0	0	0	0	0
Rv0956|AJW48545.1|UB21_05070|ARN05585.1|BJM02_05040|Phosphoribosylglycinamide formyltransferase (EC 2.1.2.2) (5'-phosphoribosylglycinamide transformylase) (GAR transformylase) (GART)	0	0	0	0	0	0	0	0	0	0	0	0	0	2	0	0	0	0	0	0	0	2	0	0	0	0	0	0	0	0	0	0	0	0	0	0
Rv0958|AJW48546.1|UB21_05080|ARN05587.1|BJM02_05050|Possible magnesium chelatase	0	0	0	0	0	0	0	0	0	0	0	0	0	0	0	0	0	1	0	0	0	0	2	0	0	0	0	0	0	0	0	0	2	0	0	0
Rv0959|AJW51149.1|UB21_05085|ARN05588.1|BJM02_05055|Uncharacterized protein Rv0959	0	0	0	2	0	0	0	0	0	0	0	0	0	0	0	0	0	0	0	0	0	0	0	0	0	0	0	0	0	0	0	0	0	0	0	0
Rv0959A|AJW48547.1|UB21_05090|ARN05589.1|BJM02_05060|Putative antitoxin VapB9	0	0	0	0	0	0	0	0	0	0	0	0	0	0	0	0	0	0	0	0	0	0	0	0	0	0	0	0	0	0	0	0	0	0	0	0
Rv0960|AJW48548.1|UB21_05095|ARN05590.1|BJM02_05065|Ribonuclease VapC9 (RNase VapC9) (EC 3.1.-.-) (Toxin VapC9)	0	0	0	0	0	0	0	0	0	0	0	0	0	0	0	0	0	0	0	0	0	0	0	0	0	0	0	0	0	0	0	0	0	0	0	0
Rv0961|AJW51150.1|UB21_05100|ARN08320.1|BJM02_05070|Uncharacterized protein Rv0961	0	0	0	0	0	0	0	0	0	0	0	0	0	0	0	0	0	0	0	0	0	0	0	0	0	0	0	0	0	0	0	0	0	0	0	0
Rv0962c|AJW48549.1|UB21_05105|ARN05591.1|BJM02_05075|Uncharacterized lipoprotein LprP	0	0	0	0	0	0	0	0	0	0	0	0	0	0	0	0	0	0	0	0	0	0	0	0	0	0	0	0	0	0	0	0	0	0	0	0
Rv0963c|AJW51151.1|UB21_05110|ARN08321.1|BJM02_05080|Uncharacterized protein Rv0963c	0	0	0	0	0	0	0	0	0	0	0	0	0	0	0	0	0	0	0	0	0	0	0	0	0	0	0	0	0	0	0	0	0	0	0	0
Rv0964c|AJW48550.1|UB21_05115|ARN05592.1|BJM02_05085|Uncharacterized protein Rv0964c	0	0	0	0	0	0	0	0	0	0	2	0	0	0	0	0	0	0	0	0	0	0	0	0	0	0	0	0	0	0	0	0	0	0	0	0
Rv0965c|AJW48551.1|UB21_05120|ARN05593.1|BJM02_05090|Uncharacterized protein Rv0965c	0	0	0	0	0	0	0	0	0	0	0	0	0	0	0	0	0	0	0	0	0	0	0	0	0	0	0	0	0	0	0	0	0	0	0	0
Rv0966c|AJW48552.1|UB21_05125|ARN05594.1|BJM02_05095|Uncharacterized protein Rv0966c	0	0	0	0	0	0	0	0	0	0	0	0	0	0	0	0	0	0	0	0	0	0	0	0	0	2	0	0	0	0	0	0	0	0	0	0
Rv0967|AJW48553.1|UB21_05130|ARN05595.1|BJM02_05100|Copper-sensing transcriptional repressor CsoR (Copper-sensitive operon repressor)	0	0	0	0	0	0	0	0	0	0	0	0	0	0	0	0	0	0	0	0	0	0	0	0	0	0	0	0	0	0	0	0	0	0	0	0
Rv0968|AJW48554.1|UB21_05135|ARN05596.1|BJM02_05105|Uncharacterized protein Rv0968	0	0	0	0	0	0	0	0	0	0	0	0	0	0	0	0	0	0	0	0	0	0	0	0	0	0	0	0	0	0	0	2	0	0	2	0
Rv0969|AJW48555.1|UB21_05140|ARN05597.1|BJM02_05110|Probable copper-exporting P-type ATPase V (EC 7.2.2.8) (Cu(+)-exporting ATPase)	0	0	0	0	2	0	0	0	0	0	0	0	0	0	0	0	0	0	0	0	0	0	0	0	0	0	0	0	0	0	0	0	0	0	0	0
Rv0970|AJW48556.1|UB21_05145|ARN05598.1|BJM02_05115|Uncharacterized protein Rv0970	0	0	0	0	0	0	0	0	0	0	0	0	0	0	0	0	0	0	0	0	0	0	0	0	0	0	0	0	0	0	0	0	0	0	0	0
Rv0971c|AJW48557.1|UB21_05150|ARN05599.1|BJM02_05120|Probable enoyl-CoA hydratase EchA7 (Enoyl hydrase) (Unsaturated acyl-CoA hydratase) (Crotonase)	0	0	0	0	0	0	0	0	0	0	0	0	0	0	0	0	0	0	0	0	0	0	0	0	0	0	0	0	0	0	0	0	0	0	0	0
Rv0972c|AJW48558.1|UB21_05155|ARN05600.1|BJM02_05125|Acyl-CoA dehydrogenase fadE12 (EC 1.3.99.-)	0	0	0	0	0	0	0	2	0	0	0	0	0	0	0	0	0	0	0	1	0	0	0	0	0	0	0	0	0	0	2	0	1	0	0	0
Rv0973c|AJW51152.1|UB21_05160|ARN08322.1|BJM02_05130|Probable acetyl-/propionyl-coenzyme A carboxylase alpha chain (Alpha subunit) AccA2: biotin carboxylase + biotin carboxyl carrier protein (BCCP)	0	0	0	0	0	0	0	0	0	0	0	0	0	0	0	0	0	0	0	0	0	1	0	0	0	0	0	0	2	0	0	0	0	2	0	0
Rv0974c|AJW48559.1|UB21_05165|ARN05601.1|BJM02_05135|Probable acetyl-/propionyl-CoA carboxylase (Beta subunit) AccD2	0	0	0	0	0	0	0	0	0	0	0	0	0	0	0	0	0	0	0	0	0	0	0	0	0	0	0	0	0	0	0	0	0	0	0	0
Rv0978c|AJW51153.1|UB21_05190|ARN08323.1|BJM02_05155|PE-PGRS family protein PE_PGRS17	0	0	0	0	0	0	0	0	0	0	0	0	0	0	0	0	0	0	0	0	0	0	0	0	0	0	0	0	2	0	0	0	0	0	0	0
Rv0979.1c|AJW48562.1|UB21_05200|ARN05605.1|BJM02_05165|50S ribosomal protein L32	0	0	0	0	0	0	0	0	0	0	0	0	0	0	0	0	0	0	0	0	0	0	0	0	0	0	0	0	0	0	0	0	0	0	0	0
Rv0979c|AJW48561.1|UB21_05195|ARN05604.1|BJM02_05160|Uncharacterized protein	0	0	0	0	0	0	0	0	0	0	0	0	0	0	0	0	0	0	0	0	0	0	0	0	0	0	0	0	0	0	0	0	0	0	0	0
Rv0980c|AJW48563.1|UB21_05205|*|*|PE-PGRS family protein PE_PGRS18	0	0	0	0	0	0	0	0	0	0	0	0	0	0	0	0	0	0	0	3	0	0	0	0	0	3	3	0	0	0	0	0	0	0	0	0
Rv0981|AJW51154.1|UB21_05210|ARN08324.1|BJM02_05175|Response regulator MprA (Mycobacterial persistence regulator A)	0	0	0	0	0	0	0	0	0	0	0	0	0	0	0	0	0	0	0	0	0	0	0	0	0	2	0	0	0	0	0	0	0	0	0	0
Rv0982|AJW48564.1|UB21_05215|ARN05606.1|BJM02_05180|Signal transduction histidine-protein kinase/phosphatase MprB (EC 2.7.13.3) (EC 3.1.3.-) (Mycobacterial persistence regulator B)	1	2	0	0	1	0	1	0	2	0	0	0	1	0	0	0	0	0	0	0	0	1	0	0	0	1	0	0	0	1	0	0	0	1	2	1
Rv0983|AJW48565.1|UB21_05220|ARN05607.1|BJM02_05185|Serine protease PepD (EC 3.4.21.107) (HtrA-like serine protease)	2	0	0	0	0	2	0	2	1	0	0	1	2	2	0	0	0	1	0	0	0	0	2	0	0	0	0	1	1	1	1	2	3	0	0	0
Rv0984|AJW48566.1|UB21_05225|ARN05608.1|BJM02_05190|MoCF_biosynth domain-containing protein	0	0	0	0	0	0	0	0	0	0	0	0	0	0	0	0	0	0	0	0	0	0	0	0	0	6	0	0	2	0	0	0	0	0	0	0
Rv0985c|AJW51155.1|UB21_05230|ARN08325.1|BJM02_05195|Large-conductance mechanosensitive channel	0	0	0	0	0	0	0	0	0	0	0	0	0	0	0	0	0	0	0	0	0	0	0	0	0	0	0	0	0	0	0	0	0	0	0	0
Rv0986|AJW48567.1|UB21_05235|ARN05609.1|BJM02_05200|Uncharacterized ABC transporter ATP-binding protein Rv0986	0	0	0	0	0	0	0	0	0	0	0	0	2	0	0	0	0	0	0	0	0	0	0	0	0	0	2	0	0	0	0	0	0	0	0	0
Rv0987|AJW48568.1|UB21_05240|ARN05610.1|BJM02_05205|Uncharacterized ABC transporter permease protein Rv0987	0	0	0	0	4	0	0	0	0	0	0	1	0	0	0	2	0	0	0	0	0	0	0	0	0	0	0	0	0	0	0	2	0	1	0	0
Rv0988|AJW48569.1|UB21_05245|ARN05611.1|BJM02_05210|Possible conserved exported protein	0	0	2	2	0	0	0	0	0	0	1	0	0	0	0	0	0	0	0	0	2	0	0	0	0	0	0	0	0	0	0	0	0	0	0	0
Rv0989c|AJW48570.1|UB21_05250|ARN05612.1|BJM02_05215|Probable polyprenyl-diphosphate synthase GrcC2 (Polyprenyl pyrophosphate synthetase)	0	0	0	0	0	0	0	0	0	0	0	0	0	0	0	0	0	0	0	0	0	0	0	0	0	0	0	0	0	0	0	0	0	0	0	0
Rv0990c|AJW48571.1|UB21_05255|ARN05613.1|BJM02_05220|SAF domain-containing protein	0	0	0	0	0	0	1	0	0	0	0	0	1	0	0	0	1	0	0	1	1	0	0	0	0	0	0	0	0	0	0	0	2	0	0	0
Rv0991c|AJW51156.1|UB21_05260|ARN08326.1|BJM02_05225|Conserved serine rich protein	0	0	0	0	0	0	0	0	0	0	0	0	1	0	0	0	1	0	0	0	3	2	4	0	0	0	2	0	0	0	0	0	0	0	0	0
Rv0992c|AJW51157.1|UB21_05265|ARN08327.1|BJM02_05230|5-formyltetrahydrofolate cyclo-ligase (EC 6.3.3.2)	0	0	2	0	0	0	0	0	0	0	0	0	0	0	2	0	0	1	1	2	0	0	0	2	2	1	4	2	0	0	0	0	0	0	0	0
Rv0993|AJW48572.1|UB21_05270|ARN05614.1|BJM02_05235|UTP--glucose-1-phosphate uridylyltransferase (EC 2.7.7.9)	0	0	0	2	0	0	1	0	1	0	0	0	0	0	0	0	0	0	0	0	2	0	0	0	0	1	1	0	0	0	0	0	0	0	0	0
Rv0994|AJW48573.1|UB21_05275|ARN05615.1|BJM02_05240|Molybdopterin molybdenumtransferase 1 (MPT Mo-transferase 1) (EC 2.10.1.1)	0	0	1	0	0	0	0	0	0	0	0	0	0	0	0	0	0	0	0	0	0	0	0	0	0	0	0	0	0	0	0	0	0	0	0	0
Rv0995|AJW48574.1|UB21_05280|ARN05616.1|BJM02_05245|Ribosomal-protein-alanine acetyltransferase RimJ (Acetylating enzyme for N-terminal of ribosomal protein S5)	0	0	0	0	0	0	0	0	0	0	0	0	0	0	0	0	0	0	0	0	0	0	0	0	0	0	0	0	0	0	0	0	0	0	0	0
Rv0996|AJW48575.1|UB21_05285|ARN05617.1|BJM02_05250|Probable conserved transmembrane protein	0	0	0	0	0	0	0	0	0	0	0	1	0	0	0	0	0	0	0	0	0	1	0	0	0	0	2	0	0	0	0	0	0	0	0	0
Rv0998|AJW51158.1|UB21_05310|ARN08328.1|BJM02_05275|Acetyltransferase Pat (EC 2.3.1.-) (GCN5-like enzyme) (GCN5-related N-acetyltransferase) (GNAT) (Protein acetyltransferase) (Pat)	0	0	0	0	0	0	0	0	0	0	0	0	0	0	0	0	0	0	0	0	0	0	0	0	0	0	0	0	0	0	0	0	0	0	0	0
Rv0999|AJW51159.1|UB21_05315|ARN08329.1|BJM02_05280|DUF5642 domain-containing protein	0	0	0	0	0	0	0	0	0	0	0	0	0	0	0	0	0	0	0	0	0	0	0	0	0	0	0	0	0	0	2	0	0	0	0	0
Rv1000c|AJW48579.1|UB21_05320|ARN05621.1|BJM02_05285|Fe2OG dioxygenase domain-containing protein	0	0	0	0	0	0	0	0	0	0	0	0	0	0	0	0	0	0	0	0	0	0	0	0	0	0	0	0	0	0	0	0	2	0	4	0
Rv1001|AJW48580.1|UB21_05325|ARN05622.1|BJM02_05290|Arginine deiminase (ADI) (EC 3.5.3.6) (Arginine dihydrolase) (AD)	0	0	0	0	0	0	0	0	0	0	0	0	0	0	0	0	0	0	0	0	0	0	0	0	0	0	0	0	0	0	4	0	2	0	0	0
Rv1002c|AJW48581.1|UB21_05330|ARN05623.1|BJM02_05295|Probable dolichyl-phosphate-mannose--protein mannosyltransferase (EC 2.4.1.109)	2	2	0	0	3	1	4	6	2	2	0	2	0	5	3	1	10	8	6	18	6	2	6	4	7	17	7	17	5	4	1	4	5	0	1	10
Rv1003|AJW48582.1|UB21_05335|ARN05624.1|BJM02_05300|Ribosomal RNA small subunit methyltransferase I (EC 2.1.1.198) (16S rRNA 2'-O-ribose C1402 methyltransferase) (rRNA (cytidine-2'-O-)-methyltransferase RsmI)	0	0	0	0	0	0	0	0	0	0	0	0	0	0	0	0	0	0	0	0	0	0	0	0	0	0	0	0	1	0	0	0	0	0	0	0
Rv1004c|AJW48583.1|UB21_05340|ARN05625.1|BJM02_05305|Probable membrane protein	0	0	0	0	0	0	0	0	0	0	0	0	0	0	0	0	0	0	0	0	0	0	0	0	0	0	0	1	0	0	2	0	0	0	0	0
Rv1006|AJW48584.1|UB21_05350|ARN05627.1|BJM02_05315|Uncharacterized protein	3	2	2	4	0	0	0	1	1	4	1	5	0	0	0	0	6	2	1	0	0	0	3	0	0	0	0	1	0	0	0	0	0	2	0	0
Rv1007c|AJW48585.1|UB21_05355|ARN05628.1|BJM02_05320|Methionine--tRNA ligase (EC 6.1.1.10) (Methionyl-tRNA synthetase) (MetRS)	0	0	0	0	0	0	0	0	0	0	2	0	0	0	0	0	0	0	0	0	0	0	0	0	0	0	0	0	0	0	0	0	0	0	0	0
Rv1008|AJW48586.1|UB21_05360|ARN05629.1|BJM02_05325|Uncharacterized metal-dependent hydrolase TatD (EC 3.1.-.-)	0	0	0	0	0	0	0	0	0	0	0	0	0	0	0	0	1	0	1	0	0	0	0	0	1	0	0	0	0	0	0	0	0	0	0	0
Rv1009|AJW48587.1|UB21_05365|ARN05630.1|BJM02_05330|Resuscitation-promoting factor RpfB (EC 3.-.-.-)	0	0	0	0	0	0	0	0	0	0	0	2	0	0	0	0	0	0	0	0	2	2	0	0	0	0	0	0	0	0	0	0	2	2	0	0
Rv1010|AJW51160.1|UB21_05370|ARN05631.1|BJM02_05335|Ribosomal RNA small subunit methyltransferase A (EC 2.1.1.182) (16S rRNA (adenine(1518)-N(6)/adenine(1519)-N(6))-dimethyltransferase) (16S rRNA dimethyladenosine transferase) (16S rRNA dimethylase) (S-adenosylmethionine-6-N', N'-adenosyl(rRNA) dimethyltransferase)	0	0	0	0	0	0	0	0	0	0	0	0	0	0	0	0	0	0	0	0	0	0	0	0	0	0	0	0	0	0	0	0	0	0	0	0
Rv1011|AJW51161.1|UB21_05375|ARN05632.1|BJM02_05340|4-diphosphocytidyl-2-C-methyl-D-erythritol kinase (CMK) (EC 2.7.1.148) (4-(cytidine-5'-diphospho)-2-C-methyl-D-erythritol kinase)	0	0	0	0	20	15	15	15	3	1	2	3	1	1	1	1	38	35	45	44	7	5	2	7	63	62	53	60	6	2	3	2	1	2	4	3
Rv1012|AJW48588.1|UB21_05380|ARN05633.1|BJM02_05345|Uncharacterized protein	0	0	0	0	0	0	0	0	0	0	0	0	0	0	0	0	0	0	0	0	0	0	0	0	0	0	0	0	0	0	0	0	0	0	0	0
Rv1013|AJW48589.1|UB21_05385|ARN05634.1|BJM02_05350|Putative ligase Rv1013 (EC 6.2.1.-)	0	2	0	0	0	0	0	0	0	2	0	0	0	0	0	0	0	0	2	0	0	0	0	0	2	0	0	0	0	0	0	0	0	0	0	0
Rv1014c|AJW48590.1|UB21_05390|ARN05635.1|BJM02_05355|Peptidyl-tRNA hydrolase (PTH) (EC 3.1.1.29)	0	1	0	0	0	0	0	0	0	0	0	0	2	0	0	0	0	0	0	0	0	0	0	0	0	0	0	0	0	0	0	0	0	0	0	0
Rv1015c|AJW48591.1|UB21_05395|ARN05636.1|BJM02_05360|50S ribosomal protein L25 (General stress protein CTC)	0	2	2	0	0	0	0	0	0	0	0	0	0	0	0	0	0	0	0	0	2	0	0	0	0	0	0	0	0	0	0	0	0	0	0	0
Rv1016c|AJW48592.1|UB21_05400|ARN08330.1|BJM02_05365|Putative lipoprotein LpqT	0	0	0	0	0	0	0	0	0	0	0	0	0	0	0	0	0	0	0	2	0	0	0	0	0	0	0	0	0	0	2	0	0	0	0	0
Rv1017c|AJW48593.1|UB21_05405|ARN05637.1|BJM02_05370|Ribose-phosphate pyrophosphokinase (RPPK) (EC 2.7.6.1) (5-phospho-D-ribosyl alpha-1-diphosphate) (Phosphoribosyl diphosphate synthase) (Phosphoribosyl pyrophosphate synthase) (P-Rib-PP synthase) (PRPP synthase) (PRPPase)	0	0	0	0	0	0	0	0	0	2	0	0	2	0	0	0	0	0	0	0	0	0	0	2	0	2	0	0	0	0	0	0	0	0	0	0
Rv1019|AJW51163.1|UB21_05420|ARN08331.1|BJM02_05385|Probable transcriptional regulatory protein (Probably TetR-family)	0	0	0	0	0	0	0	0	0	0	0	0	0	0	0	0	0	0	0	0	0	0	1	0	2	0	0	0	0	0	0	0	0	0	0	4
Rv1020|AJW48594.1|UB21_05425|ARN05639.1|BJM02_05390|Transcription-repair-coupling factor (TRCF) (EC 3.6.4.-)	8	8	8	5	2	1	0	3	0	1	2	2	1	0	0	0	0	1	3	4	0	1	0	0	0	2	1	2	2	2	4	2	0	1	2	0
Rv1021|AJW48595.1|UB21_05430|ARN05640.1|BJM02_05395|Nucleoside triphosphate pyrophosphohydrolase (NTP-PPase) (EC 3.6.1.8)	0	0	0	2	0	0	0	0	0	0	0	0	1	0	0	0	0	0	0	0	0	0	0	0	0	0	0	0	0	0	0	0	0	0	0	0
Rv1022|AJW48596.1|UB21_05435|ARN05641.1|BJM02_05400|Probable conserved lipoprotein LpqU	0	0	0	0	0	0	0	0	0	0	0	0	0	0	2	0	0	0	0	0	0	0	0	0	0	0	0	0	0	0	2	0	0	0	0	2
Rv1023|AJW48597.1|UB21_05440|ARN05642.1|BJM02_05405|Enolase (EC 4.2.1.11) (2-phospho-D-glycerate hydro-lyase) (2-phosphoglycerate dehydratase)	0	0	0	1	0	0	2	0	0	0	0	0	0	0	0	0	0	0	0	0	0	0	0	0	0	0	0	0	0	0	0	0	2	0	1	0
Rv1024|AJW48598.1|UB21_05445|ARN05643.1|BJM02_05410|Possible conserved membrane protein	0	0	0	0	0	0	0	0	0	0	0	0	0	0	0	0	0	0	0	0	0	0	0	0	0	0	0	0	0	0	0	0	0	0	0	0
Rv1025|AJW48599.1|UB21_05450|ARN05644.1|BJM02_05415|Conserved protein	0	0	0	0	0	0	0	0	0	0	0	0	0	0	0	0	0	0	0	0	0	0	0	0	0	0	0	0	0	0	0	0	0	0	0	0
Rv1026|AJW48600.1|UB21_05455|ARN05645.1|BJM02_05420|Exopolyphosphatase 2 (ExopolyPase 2) (EC 3.6.1.11)	0	0	0	0	0	0	0	0	0	0	0	0	0	0	0	0	0	0	0	0	2	0	0	0	0	0	0	0	0	0	0	0	0	0	0	0
Rv1027c|AJW48601.1|UB21_05460|ARN05646.1|BJM02_05425|Transcriptional regulatory protein KdpE	0	0	0	0	0	0	0	0	0	2	0	0	0	0	0	0	0	0	2	0	0	0	0	0	0	0	0	0	0	0	0	0	0	0	0	0
Rv1028A|AJW51164.1|UB21_05475|ARN08332.1|BJM02_05440|Probable membrane protein KdpF	0	0	0	0	0	0	0	0	0	0	0	0	0	0	0	0	0	0	0	0	0	0	0	0	0	0	0	0	0	0	0	0	0	0	0	0
Rv1029|AJW48603.1|UB21_05480|ARN05649.1|BJM02_05445|Potassium-transporting ATPase potassium-binding subunit (ATP phosphohydrolase [potassium-transporting] A chain) (Potassium-binding and translocating subunit A) (Potassium-translocating ATPase A chain)	0	0	0	0	0	0	0	0	0	0	0	0	0	0	0	0	0	0	0	0	0	0	0	0	0	0	0	0	0	0	0	2	0	0	0	0
Rv1030|AJW48604.1|UB21_05485|ARN05650.1|BJM02_05450|Potassium-transporting ATPase ATP-binding subunit (EC 7.2.2.6) (ATP phosphohydrolase [potassium-transporting] B chain) (Potassium-binding and translocating subunit B) (Potassium-translocating ATPase B chain)	0	0	0	0	0	0	0	0	0	1	0	0	0	0	0	0	0	0	0	0	0	0	0	0	0	0	0	0	0	0	0	0	0	0	0	0
Rv1031|AJW48605.1|UB21_05490|ARN05651.1|BJM02_05455|Potassium-transporting ATPase KdpC subunit (ATP phosphohydrolase [potassium-transporting] C chain) (Potassium-binding and translocating subunit C) (Potassium-translocating ATPase C chain)	0	2	0	0	0	0	0	0	0	0	0	0	0	0	0	0	0	0	0	1	0	0	0	0	0	0	0	0	0	0	0	0	0	0	0	0
Rv1032c|AJW48606.1|UB21_05495|ARN05652.1|BJM02_05460|Sensor histidine kinase TrcS (EC 2.7.13.3) (Tuberculosis regulatory component sensor)	0	0	0	0	0	0	0	0	0	0	0	0	0	0	0	0	2	0	0	0	0	0	2	0	0	0	0	0	0	0	0	0	0	0	0	0
Rv1033c|AJW48607.1|UB21_05500|ARN05653.1|BJM02_05465|Transcriptional regulatory protein TrcR (Tuberculosis regulatory component response regulator)	0	0	0	0	0	0	0	0	0	0	0	0	0	0	1	0	3	2	5	2	1	0	0	0	0	0	0	0	0	0	0	0	0	0	0	0
Rv1034c|AJW48608.1|UB21_05505|ARN05654.1|BJM02_05470|Probable transposase	0	0	0	0	0	0	0	0	0	0	0	0	0	0	0	0	0	0	0	0	0	0	0	0	0	0	0	0	0	0	0	0	0	0	0	0
Rv1035c|AJW48609.1|UB21_05510|ARN05655.1|BJM02_05475|Probable transposase	0	0	0	0	0	0	0	0	0	0	0	0	0	0	0	0	0	0	0	0	0	0	0	0	0	0	0	0	0	0	0	0	0	0	0	0
Rv1036c|AJW48610.1|UB21_05515|ARN05656.1|BJM02_05480|Probable IS1560 transposase	0	0	0	0	0	0	0	0	0	0	0	0	0	0	0	0	0	0	0	0	0	0	0	0	0	0	0	0	0	0	0	0	0	0	0	0
Rv1037c|AJW48611.1|UB21_05520|ARN05657.1|BJM02_05485|ESAT-6-like protein EsxI (Antigen Mtb9.9B)	0	0	2	3	0	0	0	0	0	0	2	0	3	0	0	0	0	0	0	0	0	2	0	0	0	0	0	0	0	0	0	0	0	0	0	0
Rv1038c|AJW48612.1|UB21_05525|ARN05658.1|BJM02_05490|ESAT-6-like protein EsxJ	0	0	1	0	0	0	0	0	0	1	0	2	1	1	0	0	0	0	0	0	0	1	2	0	0	0	0	0	0	0	0	1	3	0	0	0
Rv1039c|AJW48613.1|UB21_05530|ARN05659.1|BJM02_05495|PPE family protein PPE15 (Mycobacterial perilipin-1) (MPER1)	0	0	0	0	0	0	0	0	0	0	0	0	0	0	0	0	0	0	0	0	0	0	2	0	0	0	0	0	0	0	0	0	0	0	0	0
Rv1040c|AJW48614.1|UB21_05535|ARN05660.1|BJM02_05500|PE family protein PE8	0	0	0	0	0	0	0	0	0	0	0	0	0	0	0	0	0	0	0	0	0	0	0	1	0	0	0	0	0	0	0	0	0	0	0	0
Rv1041c|AJW48616.1|UB21_05545|ARN05662.1|BJM02_05510|Probable is like-2 transposase	0	0	0	0	0	0	0	0	0	0	0	0	0	0	0	0	0	0	0	0	0	0	0	0	0	0	0	0	0	0	0	0	0	0	0	0
Rv1042c|AJW48617.1|UB21_05550|ARN05663.1|BJM02_05515|Possible transposase (Probable is like-2 transposase)	0	0	0	0	0	0	0	0	0	0	0	0	0	0	0	0	0	0	0	0	0	0	0	0	0	0	1	0	0	0	0	0	0	0	0	0
Rv1043c|AJW51165.1|UB21_05555|ARN08333.1|BJM02_05520|Uncharacterized protein	1	0	0	0	0	0	0	0	0	0	0	0	2	0	0	0	0	0	0	0	0	0	0	0	0	0	0	0	0	0	0	0	0	0	0	0
Rv1044|AJW48618.1|UB21_05560|ARN05664.1|BJM02_05525|Uncharacterized protein	0	0	0	0	0	0	0	0	0	0	0	0	0	0	0	0	0	0	0	0	0	0	0	0	0	0	0	0	0	0	0	0	0	0	0	1
Rv1045|AJW48620.1|UB21_05570|ARN05666.1|BJM02_05535|Uncharacterized protein	0	0	0	0	0	0	0	0	0	0	0	0	0	0	0	0	0	0	0	0	0	2	0	0	0	0	0	0	0	0	0	0	0	0	0	0
Rv1046c|AJW48621.1|UB21_05575|ARN05667.1|BJM02_05540|Uncharacterized protein	7	8	6	8	1	1	2	1	1	2	1	2	3	0	0	1	1	4	6	2	0	2	0	0	2	2	4	4	3	1	1	0	1	0	0	1
Rv1047|AJW48622.1|UB21_05580|ARN05668.1|BJM02_05545|Mutator family transposase	1	1	2	1	0	0	0	0	0	0	0	0	0	0	0	0	0	0	0	0	0	0	0	0	0	2	0	0	0	0	0	0	0	0	0	0
Rv1048c|AJW48623.1|UB21_05585|ARN05669.1|BJM02_05550|Uncharacterized protein	0	0	0	0	0	0	2	0	0	0	0	0	0	0	0	0	0	0	0	0	0	0	0	0	2	0	0	0	2	0	0	0	0	0	0	0
Rv1049|AJW48625.1|UB21_05595|ARN05671.1|BJM02_05560|Probable transcriptional repressor protein	0	0	0	0	0	0	0	0	0	0	0	0	0	0	0	0	0	0	0	0	0	0	0	0	0	0	2	0	0	0	0	0	0	0	0	0
Rv1050|AJW51166.1|UB21_05600|ARN08334.1|BJM02_05565|Probable oxidoreductase	0	0	0	0	0	0	0	0	0	0	0	0	0	0	0	0	0	0	0	0	0	0	0	0	0	0	0	0	0	0	0	0	0	0	0	0
Rv1051c|AJW48626.1|UB21_05605|ARN05672.1|BJM02_05570|HTH_17 domain-containing protein	0	0	0	0	0	0	0	0	0	0	0	0	0	0	0	0	0	0	0	0	0	0	0	0	0	0	0	0	0	0	0	0	0	0	0	0
Rv1052|AJW48628.1|UB21_05615|ARN05674.1|BJM02_05580|Uncharacterized protein	0	0	0	0	0	0	0	0	0	0	0	0	0	0	0	0	0	0	0	0	0	0	0	0	0	0	0	0	0	0	0	0	0	0	0	0
Rv1053c|AJW48629.1|UB21_05620|ARN05675.1|BJM02_05585|Uncharacterized protein	0	0	0	0	0	0	0	0	0	0	0	0	0	0	0	0	0	0	0	0	0	0	0	0	0	0	0	0	0	0	0	0	0	0	0	0
Rv1054|AJW48631.1|UB21_05630|ARN05677.1|BJM02_05595|Probable integrase	0	0	0	0	0	0	0	0	0	0	0	0	0	0	0	0	0	0	0	0	0	0	0	0	0	0	0	0	0	0	0	0	0	0	0	0
Rv1055|AJW48632.1|UB21_05635|ARN05678.1|BJM02_05600|Possible integrase	0	0	0	0	0	0	0	0	0	0	0	0	0	0	0	0	0	0	0	0	0	0	0	0	0	0	0	0	0	0	0	0	0	0	0	0
Rv1056|AJW48633.1|UB21_05645|ARN05679.1|BJM02_05610|Conserved protein	0	0	0	0	0	0	0	0	0	0	0	0	0	0	0	0	0	0	0	0	0	0	0	0	0	2	0	0	0	0	0	0	0	0	0	0
Rv1057|AJW51167.1|UB21_05650|ARN08335.1|BJM02_05615|Seven-bladed beta-propeller protein Rv1057	0	2	0	0	0	0	0	0	0	0	0	0	2	0	0	0	0	0	2	0	0	0	2	0	0	0	0	0	2	0	0	0	0	0	2	0
Rv1058|AJW48634.1|UB21_05655|ARN05680.1|BJM02_05620|Probable medium chain fatty-acid-CoA ligase FadD14 (Fatty-acid-CoA synthetase) (Fatty-acid-CoA synthase)	0	0	0	0	0	0	0	0	0	0	0	0	0	0	0	0	0	0	0	2	0	0	0	0	0	0	0	0	0	0	0	0	0	0	2	0
Rv1059|AJW51168.1|UB21_05660|ARN05681.1|BJM02_05625|Conserved protein	0	0	1	1	0	0	0	0	0	0	0	0	0	0	0	0	0	0	0	0	0	0	1	0	0	0	1	1	0	0	1	0	0	0	0	2
Rv1060|AJW48635.1|UB21_05665|ARN05682.1|BJM02_05630|Uncharacterized protein	2	0	0	0	0	0	0	2	0	0	0	0	0	0	0	0	0	0	0	0	0	0	0	0	0	0	0	0	0	0	0	0	0	0	0	0
Rv1061|AJW48636.1|UB21_05670|ARN05683.1|BJM02_05635|Conserved protein	0	0	0	0	0	0	0	0	0	0	0	0	0	0	0	0	0	0	0	0	0	0	0	0	0	0	0	0	0	0	0	0	0	0	0	0
Rv1062|AJW51169.1|UB21_05675|ARN05684.1|BJM02_05640|PNPLA domain-containing protein	0	0	0	0	0	0	0	0	0	0	0	0	0	0	0	0	0	0	0	0	0	0	0	0	0	0	0	0	0	2	0	0	0	0	0	0
Rv1063c|AJW48637.1|UB21_05680|ARN05685.1|BJM02_05645|Uncharacterized NTE family protein Rv1063c	0	0	0	0	0	0	0	0	0	0	0	0	0	0	0	0	0	0	0	0	0	0	0	0	0	0	0	0	0	0	0	0	0	0	0	0
Rv1064c|AJW48638.1|UB21_05685|ARN05686.1|BJM02_05650|Putative lipoprotein LpqV	0	0	2	0	0	0	0	0	0	0	0	0	0	0	0	0	0	0	0	0	0	0	0	0	0	0	0	0	0	0	0	0	0	0	0	0
Rv1065|AJW48639.1|UB21_05690|ARN05687.1|BJM02_05655|Uncharacterized protein	0	0	0	0	0	0	0	0	0	0	0	0	2	0	0	4	2	0	2	0	2	0	1	4	0	0	0	0	0	6	1	0	4	0	1	0
Rv1066|AJW48640.1|UB21_05695|ARN05688.1|BJM02_05660|Rhodanese domain-containing protein	0	0	0	0	0	0	0	0	0	0	0	0	0	0	0	0	0	0	0	0	0	0	1	0	0	0	0	0	2	0	1	0	0	0	0	0
Rv1069c|AJW48641.1|UB21_05710|ARN05691.1|BJM02_05675|Conserved protein	0	0	0	0	0	0	0	0	0	0	0	0	0	0	0	0	0	0	0	0	0	0	0	0	0	0	0	0	0	0	0	0	0	0	1	0
Rv1070c|AJW48642.1|UB21_05715|ARN05692.1|BJM02_05680|Probable enoyl-CoA hydratase echA8 (EC 4.2.1.17)	0	0	0	0	0	0	0	0	0	0	0	0	0	0	0	0	0	0	0	0	0	0	0	0	0	0	0	0	0	0	0	0	0	0	0	0
Rv1071c|AJW48643.1|UB21_05720|ARN05693.1|BJM02_05685|Possible enoyl-CoA hydratase EchA9 (Enoyl hydrase) (Unsaturated acyl-CoA hydratase) (Crotonase)	0	0	0	0	0	0	0	0	0	2	0	0	0	0	0	0	0	0	0	0	0	0	0	0	0	0	0	0	0	0	0	0	0	0	0	0
Rv1072|AJW48644.1|UB21_05725|ARN05694.1|BJM02_05690|Probable conserved transmembrane protein	0	0	2	0	0	0	2	0	0	0	0	2	2	0	2	2	0	2	0	2	0	0	2	2	0	2	0	2	0	0	3	2	2	0	0	0
Rv1073|AJW51171.1|UB21_05730|ARN08336.1|BJM02_05695|Uncharacterized protein	0	0	0	0	0	0	0	0	0	0	2	0	0	0	0	0	0	0	0	0	0	0	0	0	0	0	0	0	3	0	2	0	0	0	0	0
Rv1074c|AJW51172.1|UB21_05735|ARN08337.1|BJM02_05700|Probable beta-ketoacyl CoA thiolase FadA3	1	1	0	0	1	0	0	0	0	0	0	0	0	0	2	0	0	0	0	0	2	0	0	0	2	4	0	5	0	0	0	0	2	0	4	0
Rv1075c|AJW51173.1|UB21_05740|ARN08338.1|BJM02_05705|GDSL-like esterase Rv1075c (EC 3.1.-.-) (Acetylesterase) (EC 3.1.1.6)	0	0	0	0	0	0	0	0	0	0	0	0	0	0	0	0	0	0	0	0	0	0	0	0	0	0	0	0	0	0	0	0	0	0	0	0
Rv1076|AJW51174.1|UB21_05745|ARN08339.1|BJM02_05710|Esterase LipU (EC 3.1.1.-)	0	0	0	0	0	0	0	0	0	0	0	0	0	0	0	0	0	0	0	0	0	0	2	0	0	0	0	0	0	0	0	0	0	0	0	0
Rv1077|AJW48645.1|UB21_05750|ARN05695.1|BJM02_05715|Putative cystathionine beta-synthase Rv1077 (EC 4.2.1.22) (Beta-thionase) (Serine sulfhydrase)	0	0	0	0	0	0	0	0	0	0	0	0	0	0	2	0	0	0	0	2	0	0	0	0	0	0	0	0	0	0	0	0	0	0	0	0
Rv1079|AJW48646.1|UB21_05760|ARN05697.1|BJM02_05725|Cystathionine gamma-synthase (CGS) (EC 2.5.1.48) (O-succinylhomoserine (thiol)-lyase)	0	0	0	0	0	0	0	0	0	2	0	0	0	0	0	0	0	0	0	0	0	0	0	0	1	2	1	0	2	0	0	0	0	0	0	0
Rv1080c|AJW48647.1|UB21_05765|ARN05698.1|BJM02_05730|Transcription elongation factor GreA (Transcript cleavage factor GreA)	0	0	0	0	0	0	0	0	0	2	0	0	0	0	0	0	0	0	0	0	0	0	0	0	0	0	0	0	0	0	0	0	0	1	0	0
Rv1081c|AJW48648.1|UB21_05770|ARN05699.1|BJM02_05735|Probable conserved membrane protein	0	0	0	0	0	0	0	0	0	0	0	0	0	0	0	0	0	0	0	0	0	0	0	0	0	0	0	0	0	0	0	0	0	0	0	0
Rv1082|AJW48649.1|UB21_05775|ARN05700.1|BJM02_05740|Mycothiol S-conjugate amidase (EC 3.5.1.115)	0	0	0	0	0	0	0	0	0	0	0	0	0	0	0	0	0	0	0	0	0	0	0	0	0	0	0	0	0	0	2	0	0	0	0	2
Rv1083|AJW48650.1|UB21_05780|ARN05701.1|BJM02_05745|Uncharacterized protein	0	0	0	0	0	0	0	0	0	0	0	0	0	0	0	0	0	0	0	0	0	0	1	0	0	0	0	0	0	0	0	0	0	0	0	0
Rv1084|AJW48651.1|UB21_05785|*|BJM02_05750|Conserved protein	0	0	1	1	0	0	0	0	0	0	0	0	0	0	0	0	0	0	1	0	0	0	0	0	0	0	1	0	0	0	0	0	0	2	0	2
Rv1085c|AJW51175.1|UB21_05790|ARN08340.1|BJM02_05755|UPF0073 membrane protein Rv1085c	0	0	0	0	0	0	0	0	0	0	0	0	0	0	0	0	0	0	0	0	0	0	0	0	0	0	0	0	0	0	0	2	0	0	0	0
Rv1086|AJW48652.1|UB21_05795|ARN05702.1|BJM02_05760|(2Z,6E)-farnesyl diphosphate synthase (EC 2.5.1.68) (Short-chain Z-isoprenyl diphosphate synthase) (Z-FPP synthase) (Z-FPPS) (Z-Polyprenyl diphosphate synthase) (Z-isoprenyl diphosphate synthase)	0	0	0	0	0	0	0	0	0	0	0	0	0	0	0	0	0	0	0	0	0	0	0	0	0	0	0	0	0	0	0	0	0	0	0	0
Rv1087A|AJW48653.1|UB21_05805|ARN05703.1|BJM02_05770|Uncharacterized protein	0	0	0	0	0	0	0	0	0	0	0	0	0	0	0	0	0	0	0	0	0	0	0	2	0	0	0	0	0	0	0	0	0	0	0	0
Rv1088|AJW48654.1|UB21_05810|ARN05704.1|BJM02_05775|PE family protein PE9	0	0	0	0	0	0	0	0	0	0	0	0	0	0	0	0	0	0	0	0	0	0	0	0	0	0	0	0	0	0	0	0	0	0	0	0
Rv1089A|AJW48657.1|UB21_05825|ARN05707.1|BJM02_05790|Probable cellulase CelA2a (Endo-1,4-beta-glucanase) (Endoglucanase) (Carboxymethyl cellulase)	0	0	0	0	0	0	0	0	0	0	0	0	0	0	0	0	0	0	0	0	0	0	0	0	0	0	0	0	0	0	0	0	0	0	0	0
Rv1090|AJW48658.1|UB21_05830|ARN05708.1|BJM02_05795|Probable cellulase CelA2b (Endo-1,4-beta-glucanase) (Endoglucanase) (Carboxymethyl cellulase)	0	0	0	0	0	0	0	0	0	0	0	0	0	0	0	0	0	0	0	0	0	0	0	0	0	0	0	0	0	0	0	0	0	0	0	0
Rv1092c|AJW48659.1|UB21_05840|ARN05709.1|BJM02_05805|Pantothenate kinase (EC 2.7.1.33) (Pantothenic acid kinase)	0	0	0	0	0	0	0	0	0	0	0	0	0	0	2	0	0	0	0	0	0	0	0	0	0	0	0	0	0	0	0	0	0	0	0	0
Rv1093|AJW48660.1|UB21_05845|ARN05710.1|BJM02_05810|Serine hydroxymethyltransferase 1 (SHM1) (SHMT 1) (Serine methylase 1) (EC 2.1.2.1)	0	0	0	1	2	0	0	0	0	0	0	0	0	0	0	2	0	0	0	0	0	0	0	0	0	0	2	0	0	2	0	0	2	0	0	0
Rv1094|AJW48661.1|UB21_05850|ARN05711.1|BJM02_05815|Putative acyl-[acyl-carrier-protein] desaturase DesA2 (Putative acyl-ACP desaturase DesA2) (EC 1.14.19.-)	2	0	0	0	0	0	0	0	0	0	0	0	2	4	0	2	0	0	2	0	0	0	2	2	0	2	2	0	4	4	6	0	0	0	0	0
Rv1095|AJW48662.1|UB21_05855|ARN05712.1|BJM02_05820|Probable PHOH-like protein PhoH2 (Phosphate starvation-inducible protein PSIH)	0	2	0	0	0	0	0	0	0	0	0	0	0	0	2	0	0	0	0	0	0	0	0	4	0	2	0	0	0	0	0	0	2	0	0	0
Rv1096|AJW48663.1|UB21_05860|ARN05713.1|BJM02_05825|Possible glycosyl hydrolase	0	0	0	0	0	0	0	0	0	0	0	0	0	0	0	0	0	2	0	0	2	0	0	0	0	0	0	0	0	0	2	2	0	0	0	0
Rv1097c|AJW48664.1|UB21_05865|ARN05714.1|BJM02_05830|Probable membrane glycine and proline rich protein	0	0	0	0	0	0	0	0	0	0	0	0	0	0	0	0	0	0	0	0	0	0	0	0	0	0	0	0	0	0	0	0	0	0	0	0
Rv1099c|AJW51176.1|UB21_05875|ARN08341.1|BJM02_05840|Fructose-1,6-bisphosphatase class 2 (FBPase class 2) (EC 3.1.3.11) (D-fructose-1,6-bisphosphate 1-phosphohydrolase class 2) (Fructose 1,6-bisphosphatase II)	2	2	0	2	0	0	2	0	0	0	0	0	0	0	0	0	0	0	0	1	0	0	0	0	1	0	0	2	0	0	0	0	1	0	0	0
Rv1100|AJW48666.1|UB21_05880|ARN05716.1|BJM02_05845|Conserved protein	0	0	0	0	0	0	0	0	0	0	0	0	0	0	0	0	0	0	0	0	1	0	2	0	0	0	0	0	0	0	0	0	0	0	0	0
Rv1101c|AJW48667.1|UB21_05885|ARN05717.1|BJM02_05850|Putative transport protein Rv1101c	3	5	6	2	1	1	1	0	9	6	2	6	1	2	2	1	6	3	5	7	2	2	1	0	2	0	2	2	0	3	0	0	3	2	2	6
Rv1102c|AJW48668.1|UB21_05890|ARN05718.1|BJM02_05855|Endoribonuclease MazF3 (EC 3.1.-.-) (23S rRNA endonuclease MazF3) (Toxin MazF3) (mRNA interferase MazF-mt6)	0	0	0	0	0	0	0	0	0	0	0	0	0	0	0	0	0	0	0	0	0	0	0	0	0	0	0	0	0	0	0	0	0	0	0	0
Rv1103c|AJW48669.1|UB21_05895|ARN05719.1|BJM02_05860|Antitoxin MazE3	0	0	0	0	0	0	0	0	0	0	0	0	0	0	0	2	0	0	0	0	0	0	0	0	0	0	0	0	0	0	0	0	0	0	0	0
Rv1104|AJW48670.1|UB21_05900|ARN05720.1|BJM02_05865|Possible para-nitrobenzyl esterase	0	1	0	0	0	0	0	0	0	0	0	0	0	0	0	0	0	1	0	0	0	0	0	0	1	1	0	0	0	0	0	0	0	0	1	0
Rv1106c|AJW48671.1|UB21_05910|ARN05721.1|BJM02_05875|3 beta-hydroxysteroid dehydrogenase/Delta 5-->4-isomerase (Cholesterol dehydrogenase) [Includes: 3-beta-hydroxy-Delta(5)-steroid dehydrogenase (3-beta-HSD) (3BHSD) (EC 1.1.1.145) (3-beta hydroxysterol dehydrogenase) (3-beta-hydroxy-5-ene steroid dehydrogenase) (Progesterone reductase); Steroid Delta-isomerase (EC 5.3.3.1) (Delta-5-3-ketosteroid…	0	0	0	0	0	0	0	0	0	0	0	0	0	0	0	0	0	1	0	0	0	0	0	0	0	0	0	0	0	0	0	0	0	0	0	0
Rv1107c|AJW48672.1|UB21_05915|ARN05722.1|BJM02_05880|Exodeoxyribonuclease 7 small subunit (EC 3.1.11.6) (Exodeoxyribonuclease VII small subunit) (Exonuclease VII small subunit)	0	0	0	0	0	0	0	0	0	0	0	0	0	0	1	0	0	1	0	0	0	0	0	0	0	0	0	0	0	0	0	0	0	0	0	0
Rv1108c|AJW48673.1|UB21_05920|ARN05723.1|BJM02_05885|Exodeoxyribonuclease 7 large subunit (EC 3.1.11.6) (Exodeoxyribonuclease VII large subunit) (Exonuclease VII large subunit)	0	0	0	0	0	0	0	0	0	0	0	0	0	0	0	0	0	0	0	0	0	0	0	0	1	0	0	0	0	0	0	0	0	0	0	0
Rv1109c|AJW48674.1|UB21_05925|ARN05724.1|BJM02_05890|Uncharacterized protein Rv1109c	0	0	0	0	0	0	0	0	0	0	0	0	2	0	0	0	0	0	0	0	0	0	0	0	0	0	0	0	0	0	0	0	2	0	0	0
Rv1110|AJW48675.1|UB21_05930|ARN05725.1|BJM02_05895|4-hydroxy-3-methylbut-2-enyl diphosphate reductase 2 (HDR 2) (HMBPP reductase 2) (EC 1.17.7.4)	0	0	0	0	0	0	0	0	0	0	0	0	0	0	0	0	0	0	0	0	0	0	0	0	0	0	0	2	0	0	0	0	0	0	0	2
Rv1112|AJW48676.1|UB21_05940|ARN05727.1|BJM02_05905|Ribosome-binding ATPase YchF	0	0	0	0	1	0	0	0	0	1	0	0	0	0	0	0	1	0	0	0	0	0	0	0	0	0	0	1	0	0	0	0	0	0	0	0
Rv1113|AJW48677.1|UB21_05945|ARN05728.1|BJM02_05910|Antitoxin VapB32	0	0	0	0	0	0	0	0	0	0	0	0	0	0	0	0	0	0	0	0	0	0	0	0	0	0	0	0	0	2	0	0	0	0	0	0
Rv1114|AJW48678.1|UB21_05950|ARN05729.1|BJM02_05915|Ribonuclease VapC32 (RNase VapC32) (EC 3.1.-.-) (Toxin VapC32)	1	0	0	0	0	0	0	0	0	0	0	0	0	0	0	0	0	0	0	0	0	0	0	0	0	0	0	0	0	0	0	0	0	0	0	0
Rv1115|AJW48679.1|UB21_05955|ARN05730.1|BJM02_05920|Possible exported protein	0	0	0	0	0	0	0	0	0	0	0	0	0	0	0	0	0	0	0	0	0	0	0	0	0	0	0	0	0	0	0	0	0	0	0	0
Rv1116|AJW48680.1|UB21_05960|ARN05731.1|BJM02_05925|Uncharacterized protein	0	0	0	0	0	0	0	0	0	0	0	0	0	0	0	0	0	0	0	0	0	0	0	0	0	0	0	0	0	0	0	0	0	0	0	0
Rv1116A|AJW48681.1|UB21_05965|ARN05732.1|BJM02_05930|Uncharacterized protein	0	2	0	0	0	0	0	0	0	0	0	0	0	0	0	0	0	0	0	0	0	0	0	2	0	0	0	0	0	0	0	0	0	0	0	0
Rv1117|AJW48682.1|UB21_05970|ARN05733.1|BJM02_05935|Conserved protein	0	0	0	0	0	0	0	0	0	2	0	0	0	0	2	0	0	0	0	0	0	0	0	0	0	0	0	2	0	0	0	1	0	0	0	0
Rv1118c|AJW51177.1|UB21_05975|ARN08342.1|BJM02_05940|Conserved protein	0	0	2	0	0	0	0	0	0	0	0	0	0	0	0	0	0	0	0	0	0	0	0	0	0	0	0	0	0	0	0	0	0	0	0	0
Rv1119c|AJW48683.1|UB21_05980|ARN05734.1|BJM02_05945|Uncharacterized protein	0	0	0	0	0	0	0	0	0	0	0	0	0	0	0	0	0	0	0	0	0	0	0	0	0	0	0	0	0	0	0	0	0	0	0	0
Rv1120c|AJW48684.1|UB21_05985|ARN05735.1|BJM02_05950|Guanylate cyclase domain-containing protein	2	0	2	0	0	0	0	0	0	0	0	0	0	0	0	0	0	0	0	0	0	0	0	0	0	0	0	0	0	0	0	0	0	0	0	0
Rv1121|AJW48685.1|UB21_05990|ARN05736.1|BJM02_05955|Glucose-6-phosphate 1-dehydrogenase 1 (G6PD 1) (EC 1.1.1.49)	0	0	0	0	0	0	0	0	0	0	0	0	0	0	2	0	0	0	0	0	0	0	0	0	0	0	0	0	0	4	0	0	0	0	2	0
Rv1122|AJW48686.1|UB21_05995|ARN05737.1|BJM02_05960|Probable 6-phosphogluconate dehydrogenase,decarboxylating Gnd2	0	0	0	1	0	0	0	0	0	0	0	0	0	0	0	0	0	0	0	0	0	0	0	0	0	0	0	0	0	0	0	0	0	0	0	0
Rv1123c|AJW48687.1|UB21_06000|ARN05738.1|BJM02_05965|Possible peroxidase BpoB (Non-haem peroxidase)	0	0	0	0	0	0	0	0	0	0	0	0	0	0	0	0	0	0	0	0	0	0	0	0	0	0	0	1	0	0	0	0	0	0	2	0
Rv1124|AJW48688.1|UB21_06005|ARN05739.1|BJM02_05970|Probable epoxide hydrolase EphC (Epoxide hydratase)	0	0	0	0	0	0	0	0	0	0	0	0	0	0	0	0	0	0	0	0	0	0	0	0	0	0	0	0	0	0	0	0	0	0	0	0
Rv1125|AJW51178.1|UB21_06010|ARN08343.1|BJM02_05975|WS_DGAT_C domain-containing protein	0	0	0	0	0	0	0	0	0	0	0	0	0	0	0	0	0	0	0	0	0	0	0	0	0	0	0	0	0	0	0	0	0	0	0	0
Rv1126c|AJW48689.1|UB21_06015|ARN05740.1|BJM02_05980|Conserved protein	0	0	0	0	0	0	0	0	0	0	0	0	0	0	0	0	0	0	0	0	0	0	0	0	0	0	1	0	0	0	0	0	0	0	0	0
Rv1127c|AJW48690.1|UB21_06020|ARN05741.1|BJM02_05985|Probable pyruvate, phosphate dikinase PpdK	0	0	0	0	0	0	0	0	0	0	0	0	0	0	0	0	0	0	0	2	0	0	2	0	0	0	0	0	0	0	0	0	0	0	0	0
Rv1129c|AJW48691.1|UB21_06030|ARN05742.1|BJM02_05995|HTH-type transcriptional regulator PrpR (Propionate regulator) (PRPR)	2	0	0	0	0	0	0	0	0	0	0	0	2	0	0	0	0	0	0	0	2	0	0	0	0	0	0	0	0	0	0	0	0	0	0	0
Rv1130|AJW51179.1|UB21_06035|ARN08346.1|BJM02_06000|2-methylcitrate dehydratase (2-MC dehydratase) (EC 4.2.1.79) (Aconitate hydratase) (ACN) (Aconitase) (EC 4.2.1.3)	0	0	0	0	0	0	0	0	0	0	0	0	0	0	0	0	0	0	0	0	0	2	2	0	2	2	2	1	2	0	0	0	2	0	0	0
Rv1131|AJW51180.1|UB21_06040|ARN08344.1|BJM02_06005|2-methylcitrate synthase (2-MCS) (MCS) (EC 2.3.3.5) (Citrate synthase) (EC 2.3.3.16)	0	0	0	0	0	0	0	0	0	0	2	0	2	0	0	0	0	0	0	0	2	1	0	2	0	4	2	2	2	0	0	0	2	2	6	0
Rv1132|AJW48692.1|UB21_06045|ARN05743.1|BJM02_06010|Conserved membrane protein	0	0	2	0	0	0	0	0	0	0	1	0	0	0	0	0	0	0	0	0	2	1	0	0	1	0	0	2	0	0	0	0	0	0	0	0
Rv1133c|AJW51181.1|UB21_06050|ARN08345.1|BJM02_06015|5-methyltetrahydropteroyltriglutamate--homocysteine methyltransferase (EC 2.1.1.14) (Cobalamin-independent methionine synthase) (Methionine synthase, vitamin-B12 independent isozyme)	2	2	0	2	0	0	2	1	0	0	0	0	2	0	2	0	2	0	0	0	0	0	0	3	1	0	0	0	0	1	3	0	0	0	0	0
Rv1134|AJW48693.1|UB21_06055|ARN05744.1|BJM02_06020|Uncharacterized protein	0	0	0	0	0	0	0	0	0	0	0	0	0	0	0	0	0	0	0	0	0	0	0	0	0	0	0	0	0	0	0	0	0	0	0	0
Rv1135A|AJW48697.1|UB21_06080|ARN05748.1|BJM02_06045|Possible acetyl-CoA acetyltransferase (Acetoacetyl-CoA thiolase)	0	0	0	0	0	0	0	0	0	0	0	0	0	0	0	0	0	0	0	0	0	0	0	0	0	0	0	0	0	0	1	0	0	0	0	0
Rv1136|AJW48698.1|UB21_06085|ARN05749.1|BJM02_06050|Possible enoyl-CoA hydratase	0	0	0	0	0	0	0	0	0	0	0	0	0	0	0	0	0	0	0	0	0	0	0	0	0	0	0	0	0	0	1	0	0	0	0	0
Rv1138c|AJW48700.1|UB21_06095|ARN05751.1|BJM02_06060|Possible oxidoreductase	0	0	0	0	0	0	0	0	0	0	0	0	0	0	0	0	0	0	0	0	0	0	0	0	1	1	0	0	0	0	0	0	0	0	0	0
Rv1139c|AJW48701.1|UB21_06100|ARN05752.1|BJM02_06065|Conserved hypothetical membrane protein	0	0	0	0	0	0	0	0	0	0	0	0	0	0	0	0	0	0	0	0	0	0	0	0	0	0	0	0	0	0	0	0	0	0	0	0
Rv1140|AJW48702.1|UB21_06105|ARN05753.1|BJM02_06070|Probable integral membrane protein	0	0	0	0	0	0	0	0	0	0	0	0	0	0	0	0	0	0	0	0	0	0	0	0	0	0	0	0	0	0	0	0	0	0	0	0
Rv1141c|AJW51182.1|UB21_06110|ARN08348.1|BJM02_06075|Probable enoyl-CoA hydratase EchA11 (Enoyl hydrase) (Unsaturated acyl-CoA hydratase) (Crotonase)	0	0	0	0	0	0	0	0	0	0	0	0	0	0	0	0	0	0	0	0	0	0	0	0	0	0	0	0	0	0	0	0	0	0	0	0
Rv1142c|AJW48703.1|UB21_06115|ARN05754.1|BJM02_06080|Probable enoyl-CoA hydratase EchA10 (Enoyl hydrase) (Unsaturated acyl-CoA hydratase) (Crotonase)	0	0	0	0	0	0	0	0	0	0	0	0	0	0	0	0	0	0	0	0	2	0	0	0	0	0	0	0	0	0	0	0	0	0	0	0
Rv1143|AJW51183.1|UB21_06120|ARN08347.1|BJM02_06085|Alpha-methylacyl-CoA racemase (AMACR) (EC 5.1.99.4) (MtMCR)	0	0	0	0	0	0	0	0	0	0	2	0	0	0	0	0	0	0	0	0	0	0	0	0	0	0	0	0	0	0	0	0	0	2	0	0
Rv1144|AJW48704.1|UB21_06125|ARN05755.1|BJM02_06090|Uncharacterized oxidoreductase Rv1144 (EC 1.-.-.-)	0	0	0	0	0	0	0	0	0	0	0	0	0	0	0	0	0	0	0	0	0	0	0	0	0	0	0	0	0	0	0	0	0	0	0	0
Rv1146|AJW48705.1|UB21_06130|ARN05756.1|BJM02_06095|Probable conserved transmembrane transport protein MmpL13b	0	0	0	0	0	0	0	0	2	2	0	0	0	0	0	0	0	0	0	0	0	0	0	0	2	0	0	0	0	0	0	0	0	0	0	0
Rv1147|AJW48706.1|UB21_06135|ARN05757.1|BJM02_06100|Conserved protein	0	0	0	0	0	0	0	0	0	0	0	0	0	0	0	0	0	0	0	0	0	0	0	0	0	0	0	0	0	0	0	0	0	0	0	0
Rv1148c|AJW48709.1|UB21_06150|ARN05760.1|BJM02_06115|Uncharacterized protein Rv1148c	0	0	0	0	0	0	0	0	1	0	0	0	0	0	0	0	0	0	0	0	0	0	0	0	0	0	0	1	0	0	0	0	0	0	2	0
Rv1151c|AJW48712.1|UB21_06165|ARN05763.1|BJM02_06130|NAD-dependent protein deacylase (EC 2.3.1.286) (Regulatory protein SIR2 homolog)	0	0	0	0	0	0	0	0	0	0	0	0	0	0	0	0	0	0	0	0	1	0	0	0	0	0	0	0	0	0	4	0	0	0	0	0
Rv1152|AJW48713.1|UB21_06170|ARN05764.1|BJM02_06135|Probable transcriptional regulatory protein	0	0	0	0	0	0	0	2	0	0	0	0	0	0	0	0	0	0	0	0	0	0	0	1	0	0	0	0	0	0	0	0	0	0	0	0
Rv1153c|AJW48714.1|UB21_06175|ARN05765.1|BJM02_06140|Probable O-methyltransferase Omt	0	0	0	0	0	0	0	0	0	0	0	0	0	0	0	0	0	1	0	0	0	0	0	0	0	0	0	0	0	0	0	0	0	0	1	0
Rv1154c|AJW51184.1|UB21_06180|ARN08349.1|BJM02_06145|Uncharacterized protein	0	0	0	0	0	0	0	0	0	0	0	0	0	0	0	0	0	0	0	0	0	0	0	2	0	0	0	0	0	0	0	0	0	0	0	0
Rv1155|AJW48715.1|UB21_06185|ARN05766.1|BJM02_06150|F420H(2)-dependent reductase Rv1155 (EC 1.-.-.-)	0	0	1	0	0	0	0	0	0	0	0	0	0	0	0	2	1	0	0	0	0	0	0	0	0	0	0	0	0	0	0	0	0	0	0	0
Rv1155A|AJW48716.1|UB21_06190|ARN05767.1|BJM02_06155|Uncharacterized protein Rv1155A	0	0	0	0	0	0	0	0	0	0	0	0	0	0	0	0	0	0	0	0	0	0	0	0	0	0	0	0	0	0	0	0	0	0	0	0
Rv1156|AJW48717.1|UB21_06195|ARN05768.1|BJM02_06160|Conserved protein	0	0	0	0	0	0	0	0	0	0	0	0	0	0	0	0	0	2	0	0	0	0	0	0	0	0	0	0	0	0	1	0	0	0	0	2
Rv1157c|AJW48718.1|UB21_06200|ARN05770.1|BJM02_06170|Conserved ala-, pro-rich protein	0	0	0	0	0	0	0	0	1	3	0	0	0	0	0	0	0	0	0	0	0	0	0	1	0	0	0	0	0	0	0	0	0	0	0	0
Rv1158c|AJW48719.1|UB21_06205|ARN05771.1|BJM02_06175|Conserved hypothetical ala-, pro-rich protein	0	0	0	0	0	0	0	0	0	0	0	0	0	0	0	0	0	0	0	0	0	0	0	0	2	0	0	0	0	0	0	0	0	0	0	0
Rv1159.1|AJW48721.1|UB21_06215|ARN05773.1|BJM02_06185|Putative pterin-4-alpha-carbinolamine dehydratase (PHS) (EC 4.2.1.96)	0	0	0	2	0	0	0	0	0	0	0	0	0	0	0	0	0	0	0	0	0	0	0	0	0	0	0	0	0	0	0	0	0	0	0	0
Rv1160|AJW48722.1|UB21_06220|ARN05774.1|BJM02_06190|Putative 8-oxo-dGTP diphosphatase 2 (8-oxo-dGTPase 2) (EC 3.6.1.55) (7,8-dihydro-8-oxoguanine-triphosphatase 2) (Mutator protein MutT2) (dGTP pyrophosphohydrolase 2)	0	0	0	0	0	0	0	0	0	0	0	0	0	0	0	0	0	1	0	0	0	0	0	0	0	0	0	0	0	0	0	0	0	0	0	2
Rv1161|AJW48723.1|UB21_06225|ARN05775.1|BJM02_06195|Nitrate reductase alpha subunit (EC 1.7.5.1)	0	0	0	0	0	0	0	0	4	0	0	0	0	2	2	0	0	0	0	0	4	0	2	0	0	2	4	0	8	4	0	4	0	0	0	0
Rv1163|AJW48725.1|UB21_06235|ARN05776.1|BJM02_06205|Probable respiratory nitrate reductase (Delta chain) NarJ	0	0	1	1	0	0	0	0	0	0	0	0	0	0	0	0	0	0	0	0	0	0	0	0	0	0	0	0	0	0	0	0	0	0	0	0
Rv1164|AJW48726.1|UB21_06240|ARN05777.1|BJM02_06210|Probable respiratory nitrate reductase (Gamma chain) NarI	0	0	2	0	0	0	0	0	0	0	0	0	1	1	1	3	3	3	4	3	0	0	0	0	0	0	0	0	0	0	0	0	0	0	0	0
Rv1165|AJW48727.1|UB21_06245|ARN05778.1|BJM02_06215|Possible GTP-binding translation elongation factor TypA (Tyrosine phosphorylated protein A) (GTP-binding protein)	0	0	0	0	0	0	0	0	0	0	0	0	0	0	0	0	0	0	0	0	0	0	0	0	0	0	0	0	0	0	0	0	0	0	0	0
Rv1166|AJW48728.1|UB21_06250|ARN05779.1|BJM02_06220|Probable monoacyl phosphatidylinositol tetramannoside-binding protein LpqW	0	0	1	0	0	0	0	0	1	1	1	1	0	0	0	0	0	0	0	1	0	0	1	0	0	0	0	0	2	2	0	0	0	0	0	0
Rv1167c|AJW48729.1|UB21_06255|ARN05780.1|BJM02_06225|Probable transcriptional regulatory protein	0	0	0	0	0	0	0	0	0	0	0	0	0	0	0	0	0	0	0	0	0	0	1	0	0	0	0	0	2	2	0	0	0	0	0	2
Rv1169c|AJW51185.1|UB21_06265|ARN08350.1|BJM02_06235|Esterase PE11 (EC 3.1.1.6) (PE family protein PE11)	0	0	0	0	0	0	0	0	0	0	0	0	0	0	0	0	0	0	0	0	0	0	0	0	0	0	0	0	0	2	0	0	0	0	0	0
Rv1170|AJW48730.1|UB21_06270|*|*|1D-myo-inositol 2-acetamido-2-deoxy-alpha-D-glucopyranoside deacetylase (GlcNAc-Ins deacetylase) (EC 3.5.1.103) (N-acetyl-1-D-myo-inositol 2-amino-2-deoxy-alpha-D-glucopyranoside deacetylase)	0	0	0	0	0	0	0	0	0	2	0	0	0	0	0	0	0	0	0	1	0	0	0	1	0	0	0	0	0	2	0	0	0	2	0	0
Rv1171|AJW48731.1|UB21_06275|ARN05782.1|BJM02_06245|Uncharacterized protein	0	0	0	0	0	0	0	0	0	0	0	0	0	0	0	0	0	0	0	0	0	0	0	0	0	0	0	0	0	0	0	0	0	0	0	0
Rv1172c|AJW48732.1|UB21_06280|ARN05783.1|BJM02_06250|PE family protein PE12	0	0	0	0	0	0	0	0	0	0	1	2	0	0	0	0	0	0	0	0	0	0	0	1	0	0	0	0	0	0	0	0	0	0	0	0
Rv1174c|AJW48733.1|UB21_06290|ARN05784.1|BJM02_06260|Low molecular weight T-cell antigen TB8.4	0	0	0	0	0	0	0	0	0	0	0	0	0	0	2	2	0	0	0	0	0	0	0	0	2	0	0	0	2	0	0	0	0	0	0	0
Rv1175c|AJW48734.1|UB21_06295|ARN05785.1|BJM02_06265|Probable NADPH dependent 2,4-dienoyl-CoA reductase FadH (2,4-dienoyl coenzyme A reductase) (4-enoyl-CoA reductase)	0	0	2	0	0	0	0	0	0	0	0	0	0	0	0	0	0	0	0	0	0	0	0	0	0	0	0	2	0	0	0	0	0	0	0	0
Rv1176c|AJW48735.1|UB21_06300|ARN05786.1|BJM02_06270|Uncharacterized protein	0	0	0	0	0	0	0	0	4	0	0	0	0	0	0	0	0	0	0	0	0	0	0	0	0	0	0	0	0	0	0	0	0	0	0	0
Rv1177|AJW48736.1|UB21_06305|ARN05787.1|BJM02_06275|Ferredoxin	0	0	0	0	0	0	0	0	0	0	0	0	0	0	0	0	0	0	2	2	0	0	0	2	0	0	0	0	0	0	0	2	0	0	0	0
Rv1178|AJW48737.1|UB21_06310|ARN05788.1|BJM02_06280|Aminotransferase (EC 2.6.1.-)	0	0	0	2	0	0	0	0	0	0	0	0	0	0	2	0	0	0	0	0	0	0	0	0	0	2	0	0	0	0	0	0	0	2	0	0
Rv1179c|AJW48738.1|UB21_06315|ARN05789.1|BJM02_06285|Helicase ATP-binding domain-containing protein	0	0	0	0	0	0	0	0	0	0	0	0	0	0	0	0	2	2	0	0	0	2	2	0	0	0	0	0	0	0	0	0	2	0	0	2
Rv1180/Rv1181|AJW48739.1|UB21_06320|ARN08352.1|BJM02_06290|Mycolipanoate synthase (EC 2.3.1.252) (Mycocerosic acid synthase-like polyketide synthase) (MAS-like PKS) (Mycolipanoic/mycolipenic acids synthase-like polyketide synthase)	2	3	2	2	0	0	0	0	2	0	0	0	2	2	0	0	0	0	0	2	0	2	0	2	2	4	0	4	4	4	2	0	4	4	2	0
Rv1182|AJW51187.1|UB21_06325|ARN08353.1|BJM02_06295|Acyltransferase PapA3 (EC 2.3.1.278) (EC 2.3.1.279) (Long-chain-acyl-CoA--trehalose acyltransferase) (Mycolipenoyl-CoA--2-(long-chain-fatty acyl)-trehalose mycolipenoyltransferase) (Polyketide synthase-associated protein A3)	2	0	2	0	0	0	0	0	0	0	0	0	2	4	0	2	0	0	0	0	0	0	0	0	0	0	0	0	2	0	0	2	2	0	0	0
Rv1183|AJW48740.1|UB21_06330|ARN05790.1|BJM02_06300|Acyltrehalose exporter MmpL10	2	0	2	0	0	0	0	0	0	0	0	0	0	0	0	0	0	0	0	0	0	2	0	0	0	0	0	0	2	0	0	0	0	2	0	0
Rv1184c|AJW48741.1|UB21_06335|ARN05791.1|BJM02_06305|Diacyltrehalose acyltransferase Chp2 (EC 2.3.1.-)	0	0	0	0	0	0	0	0	0	0	0	0	2	0	0	0	0	0	0	0	0	2	0	2	2	0	0	0	0	0	0	0	0	0	0	2
Rv1185c|AJW48742.1|UB21_06340|ARN05792.1|BJM02_06310|Putative fatty-acid--CoA ligase FadD21 (EC 6.2.1.-) (Acyl-CoA synthetase)	0	0	0	0	0	0	0	0	0	0	0	0	2	0	2	0	2	0	2	0	0	0	0	0	0	2	0	0	2	0	0	0	2	0	0	2
Rv1186c|AJW51188.1|UB21_06345|ARN08354.1|BJM02_06315|Conserved protein	2	0	0	1	0	0	0	0	0	0	0	0	0	0	0	0	0	0	0	0	0	0	0	0	0	0	1	0	0	0	0	0	0	0	0	0
Rv1187|AJW51189.1|UB21_06350|ARN08355.1|BJM02_06320|L-glutamate gamma-semialdehyde dehydrogenase (EC 1.2.1.88)	0	0	0	0	0	0	0	0	0	1	0	0	0	0	0	0	0	0	0	0	0	0	0	0	0	0	2	0	0	0	0	0	0	0	0	0
Rv1190|AJW48744.1|UB21_06365|ARN05795.1|BJM02_06335|AB hydrolase-1 domain-containing protein	0	0	0	0	1	0	0	0	0	0	0	0	4	1	1	1	0	0	0	0	0	0	0	0	0	0	0	0	1	2	0	1	0	0	0	0
Rv1192|AJW48745.1|UB21_06375|ARN05796.1|BJM02_06345|Uncharacterized protein	0	0	0	0	2	2	0	0	0	0	0	0	0	0	0	0	0	0	0	0	0	0	0	0	0	0	0	0	0	0	0	0	0	0	0	2
Rv1193|AJW48746.1|UB21_06380|ARN05797.1|BJM02_06350|Probable fatty-acid-CoA ligase FadD36 (Fatty-acid-CoA synthetase) (Fatty-acid-CoA synthase)	0	0	0	0	0	0	0	0	0	0	0	0	2	0	0	0	0	0	0	2	0	0	0	0	0	0	0	0	0	0	0	2	0	0	0	0
Rv1194c|AJW48747.1|UB21_06385|ARN05798.1|BJM02_06355|Conserved protein	0	0	0	0	0	0	0	0	0	0	0	0	0	0	0	0	0	0	0	0	0	0	0	0	2	0	0	0	2	0	0	0	0	0	0	0
Rv1195|AJW51190.1|UB21_06390|ARN08357.1|BJM02_06360|PE family protein PE13	0	0	4	0	0	2	0	0	1	0	0	0	0	0	0	0	0	0	0	0	0	0	0	0	0	0	0	0	1	0	0	0	0	2	1	0
Rv1196|AJW48748.1|UB21_06395|ARN05799.1|BJM02_06365|PPE family protein PPE18	0	4	0	5	0	0	0	0	1	0	0	0	0	0	1	0	0	1	0	0	0	0	2	0	0	3	0	0	3	0	1	0	0	0	1	0
Rv1200|AJW48751.1|UB21_06415|ARN05802.1|BJM02_06385|Probable conserved integral membrane transport protein	0	0	0	0	0	0	0	0	0	0	0	0	0	0	0	0	0	0	0	0	0	0	0	0	0	0	0	0	0	0	0	0	0	0	0	0
Rv1201c|AJW51192.1|UB21_06420|ARN08359.1|BJM02_06390|2,3,4,5-tetrahydropyridine-2,6-dicarboxylate N-succinyltransferase (EC 2.3.1.117) (Tetrahydrodipicolinate N-succinyltransferase) (THDP succinyltransferase) (THP succinyltransferase) (Tetrahydropicolinate succinylase)	0	0	0	0	0	0	0	2	0	0	0	0	0	0	0	0	0	0	0	0	0	0	0	0	0	0	0	0	0	0	0	0	0	0	0	0
Rv1202|AJW48752.1|UB21_06425|ARN05803.1|BJM02_06395|Putative succinyl-diaminopimelate desuccinylase DapE (SDAP desuccinylase) (EC 3.5.1.18)	0	0	0	0	0	0	0	0	0	0	0	0	0	0	0	0	0	0	0	0	0	0	0	0	0	0	0	0	0	0	0	0	2	0	0	0
Rv1203c|AJW48753.1|UB21_06430|ARN05804.1|BJM02_06400|Uncharacterized protein	0	0	0	0	0	0	0	0	0	0	0	0	0	0	0	0	0	0	0	0	0	0	0	0	0	0	0	0	0	0	0	0	0	0	0	0
Rv1204c|AJW48754.1|UB21_06435|ARN05805.1|BJM02_06405|AAA domain-containing protein	0	0	0	0	0	2	0	0	0	0	0	0	0	0	0	0	0	0	0	1	0	0	0	0	1	0	0	1	0	0	0	0	0	0	0	0
Rv1205|AJW48755.1|UB21_06440|ARN05806.1|BJM02_06410|Cytokinin riboside 5'-monophosphate phosphoribohydrolase (EC 3.2.2.n1) (Protein LONELY GUY homolog) (LOG homolog)	0	0	0	0	0	0	0	0	0	0	0	0	0	0	0	0	0	0	0	0	0	0	0	0	0	0	0	0	0	0	0	0	0	0	0	0
Rv1206|AJW48756.1|UB21_06445|ARN05807.1|BJM02_06415|Probable fatty-acid-CoA ligase FadD6 (Fatty-acid-CoA synthetase) (Fatty-acid-CoA synthase)	0	0	0	0	0	0	0	0	0	0	0	0	0	0	0	0	0	0	0	0	2	0	0	0	0	0	0	0	0	0	0	0	0	0	0	0
Rv1207|AJW48757.1|UB21_06450|ARN05809.1|BJM02_06425|Inactive dihydropteroate synthase 2 (DHPS 2) (Dihydropteroate pyrophosphorylase 2)	0	0	0	0	0	0	0	0	0	0	0	0	0	0	0	0	0	0	0	0	0	0	0	0	0	0	0	2	0	0	2	0	0	0	0	0
Rv1208|AJW48758.1|UB21_06455|ARN05810.1|BJM02_06430|Glucosyl-3-phosphoglycerate synthase (GpgS) (EC 2.4.1.266) (Retaining glucosyltransferase)	2	0	0	0	0	0	0	0	0	0	0	0	0	1	2	0	0	0	0	0	0	0	0	0	0	0	0	0	0	0	0	0	0	0	0	0
Rv1209|AJW48759.1|UB21_06460|ARN05811.1|BJM02_06435|Conserved protein	0	0	0	0	0	0	0	0	0	0	0	0	0	0	0	0	0	0	0	0	0	0	0	0	0	0	0	0	0	0	0	0	0	0	0	0
Rv1210|AJW48760.1|UB21_06465|ARN05812.1|BJM02_06440|Probable DNA-3-methyladenine glycosylase I TagA (Tag I) (3-methyladenine-DNA glycosylase I, constitutive) (DNA-3-methyladenine glycosidase I)	0	0	0	0	0	0	0	0	0	0	0	0	0	0	0	0	0	0	0	0	0	0	0	0	0	0	0	0	0	0	0	0	0	0	0	0
Rv1211|AJW48761.1|UB21_06470|ARN08360.1|BJM02_06445|Conserved protein	0	0	0	0	0	0	0	0	0	0	0	0	0	2	0	0	0	2	0	0	2	1	4	0	0	0	0	0	0	2	0	4	0	2	0	0
Rv1212c|AJW48762.1|UB21_06475|ARN05813.1|BJM02_06450|Alpha-maltose-1-phosphate synthase (M1P synthase) (EC 2.4.1.342) (ADP-alpha-D-glucose:alpha-D-glucose-1-phosphate 4-alpha-D-glucosyltransferase) (M1P-producing glucosyltransferase)	0	0	0	0	0	0	0	0	0	0	0	0	0	0	0	0	0	2	0	0	0	0	0	0	0	0	0	0	0	0	2	0	0	0	0	0
Rv1213|AJW48763.1|UB21_06480|ARN05814.1|BJM02_06455|Glucose-1-phosphate adenylyltransferase (EC 2.7.7.27) (ADP-glucose pyrophosphorylase) (ADPGlc PPase) (ADP-glucose synthase)	2	0	0	4	0	0	1	0	0	0	0	0	1	0	0	0	0	0	0	0	1	0	1	0	0	1	1	1	0	0	0	0	0	0	1	0
Rv1214c|AJW48764.1|UB21_06485|ARN05815.1|BJM02_06460|PE family protein PE14	0	0	0	0	0	0	0	0	0	0	0	0	0	0	0	0	0	0	0	0	0	0	2	0	0	0	0	0	0	0	0	0	0	0	0	0
Rv1215c|AJW48765.1|UB21_06490|ARN05816.1|BJM02_06465|Conserved protein	39	55	36	48	12	8	15	10	9	23	13	25	3	3	9	4	22	17	22	18	4	6	6	3	14	22	25	18	4	10	7	6	3	9	5	11
Rv1216c|AJW48766.1|UB21_06495|ARN05817.1|BJM02_06470|Probable conserved integral membrane protein	0	0	0	0	0	0	0	0	0	0	0	0	0	0	0	0	0	0	0	0	0	0	0	0	0	0	0	0	0	0	0	0	0	0	0	0
Rv1217c|AJW48767.1|UB21_06500|ARN05818.1|BJM02_06475|Multidrug efflux system permease protein Rv1217c	0	0	0	0	0	0	0	0	0	0	0	0	0	0	0	0	0	0	0	0	0	0	0	0	0	1	0	0	0	0	0	0	0	0	0	0
Rv1218c|AJW48768.1|UB21_06505|ARN05819.1|BJM02_06480|Multidrug efflux system ATP-binding protein Rv1218c (EC 7.6.2.-)	0	0	0	0	0	0	0	0	3	0	0	0	0	0	0	0	0	0	0	0	0	0	0	0	0	0	0	0	0	0	0	0	0	0	0	0
Rv1219c|AJW48769.1|UB21_06510|ARN05820.1|BJM02_06485|HTH-type transcriptional regulatory protein RaaS (Regulator of antimicrobial-assisted survival)	0	0	0	0	0	0	0	0	0	0	0	0	0	0	0	0	0	1	0	0	0	0	0	0	0	0	0	1	0	0	0	0	0	0	1	0
Rv1220c|AJW51193.1|UB21_06515|ARN08361.1|BJM02_06490|Putative O-methyltransferase Rv1220c (EC 2.1.1.-)	0	0	0	0	0	0	0	0	0	0	0	0	0	0	0	0	0	0	0	0	0	0	0	0	0	0	0	0	0	0	0	0	0	0	0	0
Rv1221|AJW48770.1|UB21_06520|ARN05821.1|BJM02_06495|ECF RNA polymerase sigma factor SigE (ECF sigma factor SigE) (Alternative RNA polymerase sigma factor SigE) (RNA polymerase sigma-E factor) (Sigma-E factor)	0	0	0	0	2	0	0	0	0	0	0	0	0	0	2	2	0	0	0	0	2	2	5	0	0	0	0	0	2	2	4	2	0	2	0	3
Rv1222|AJW51194.1|UB21_06525|ARN08362.1|BJM02_06500|Anti-sigma-E factor RseA (Regulator of SigE) (Sigma-E anti-sigma factor RseA)	0	0	0	0	1	0	0	0	0	0	0	0	2	0	0	2	0	0	0	0	0	0	0	2	0	0	0	2	0	0	0	0	0	0	2	0
Rv1223|AJW51195.1|UB21_06530|ARN08363.1|BJM02_06505|Probable serine protease HtrA1 (EC 3.4.21.107) (High-temperature requirement A protease)	0	0	0	0	0	0	0	0	0	0	0	0	0	0	0	0	2	0	0	0	0	0	2	2	0	0	0	0	3	2	0	0	0	2	0	2
Rv1224|AJW48771.1|UB21_06535|ARN05822.1|BJM02_06510|Sec-independent protein translocase protein TatB	0	0	0	0	0	0	0	0	0	0	0	0	0	0	2	0	0	0	0	0	0	0	0	0	0	0	0	0	0	0	0	0	0	0	2	0
Rv1226c|AJW48772.1|UB21_06545|ARN05823.1|BJM02_06520|Probable transmembrane protein	0	0	0	0	1	0	0	0	0	0	0	0	0	0	0	0	1	0	1	0	0	0	0	0	2	1	0	0	0	0	0	0	0	1	0	0
Rv1227c|AJW48773.1|UB21_06550|ARN05824.1|BJM02_06525|Probable transmembrane protein	0	0	0	0	0	0	0	0	0	0	0	0	0	0	0	0	0	0	0	0	0	0	0	0	0	0	0	0	0	0	0	0	0	0	0	0
Rv1228|AJW48774.1|UB21_06555|ARN05825.1|BJM02_06530|Probable lipoprotein LpqX	0	0	0	0	0	0	0	0	0	0	0	0	0	0	0	0	0	0	0	0	0	0	0	0	0	0	1	0	0	2	0	0	0	0	0	0
Rv1229c|AJW48775.1|UB21_06560|ARN05826.1|BJM02_06535|Iron-sulfur cluster carrier protein	0	0	0	0	0	0	0	0	1	2	0	0	0	0	0	0	2	0	0	0	0	0	0	0	0	0	2	0	0	2	0	0	0	2	0	0
Rv1230c|AJW48776.1|UB21_06565|ARN05827.1|BJM02_06540|Possible membrane protein	0	0	0	0	0	0	0	0	0	0	0	0	0	1	0	0	0	0	0	0	0	0	0	0	0	0	0	0	0	0	0	0	0	0	0	0
Rv1231c|AJW48777.1|UB21_06570|ARN05828.1|BJM02_06545|Probable membrane protein	0	0	0	0	0	0	0	0	0	0	0	0	0	0	0	0	0	0	0	0	0	0	0	0	0	0	0	0	0	0	0	0	0	0	0	0
Rv1232c|AJW48778.1|UB21_06575|ARN05829.1|BJM02_06550|Conserved protein	0	0	2	0	0	0	0	0	0	0	0	0	0	0	0	0	0	0	0	0	0	0	0	0	0	0	0	0	0	0	0	0	0	1	0	0
Rv1234|AJW48780.1|UB21_06585|ARN05831.1|BJM02_06560|Probable transmembrane protein	0	0	0	0	0	0	0	0	0	0	0	0	0	0	0	0	0	0	0	0	0	0	0	0	0	1	0	0	0	0	0	0	0	2	0	0
Rv1235|AJW48781.1|UB21_06590|ARN05832.1|BJM02_06565|Trehalose-binding lipoprotein LpqY	0	0	0	0	0	0	0	0	0	0	0	0	0	0	0	0	2	0	0	0	0	0	0	0	0	0	0	0	0	0	0	0	0	0	0	0
Rv1236|AJW48782.1|UB21_06595|ARN08365.1|BJM02_06570|Trehalose transport system permease protein SugA	0	0	0	0	0	0	0	0	0	0	0	0	0	0	0	0	0	0	0	0	0	0	0	0	0	0	0	0	0	0	0	0	0	0	0	0
Rv1237|AJW48783.1|UB21_06600|ARN08364.1|BJM02_06575|Trehalose transport system permease protein SugB	1	1	0	0	0	1	1	2	0	0	0	0	0	0	0	0	0	1	1	1	0	0	0	0	2	2	0	2	0	0	0	0	0	0	0	0
Rv1238|AJW48784.1|UB21_06605|ARN05833.1|BJM02_06580|Trehalose import ATP-binding protein SugC (EC 7.5.2.-)	0	0	2	0	0	0	0	0	2	4	1	0	0	0	0	0	0	0	0	0	0	0	0	0	0	0	0	0	0	0	0	0	0	0	0	0
Rv1239c|AJW48785.1|UB21_06610|ARN05834.1|BJM02_06585|Magnesium transport protein CorA	0	0	0	0	0	0	0	0	0	0	0	0	0	0	1	0	0	0	0	0	0	0	0	0	0	0	0	0	0	0	1	0	0	0	0	0
Rv1240|AJW48786.1|UB21_06615|ARN05835.1|BJM02_06590|Malate dehydrogenase (EC 1.1.1.37)	2	0	0	2	0	0	0	2	0	2	0	0	0	0	0	0	0	0	0	0	0	0	0	0	2	0	0	0	0	2	0	0	0	0	0	0
Rv1241|AJW48787.1|UB21_06620|ARN05836.1|BJM02_06595|Antitoxin VapB33	0	0	0	0	0	0	0	0	0	0	0	0	0	0	0	0	0	0	0	0	0	0	0	0	0	0	0	0	0	0	0	0	0	0	0	0
Rv1242|AJW48788.1|UB21_06625|ARN05837.1|BJM02_06600|Ribonuclease VapC33 (RNase VapC33) (EC 3.1.-.-) (Toxin VapC33)	0	0	0	0	0	0	0	0	0	0	0	0	0	0	0	0	0	0	0	0	0	0	0	0	0	0	0	0	0	0	0	0	0	0	0	0
Rv1244|AJW51196.1|UB21_06640|ARN08366.1|BJM02_06610|Probable lipoprotein LpqZ	4	4	0	2	4	2	1	1	2	0	1	0	1	0	0	0	1	1	2	1	0	0	0	0	0	1	1	0	1	0	0	1	0	0	0	0
Rv1245c|AJW48789.1|UB21_06645|ARN05839.1|BJM02_06615|Probable short-chain type dehydrogenase/reductase	0	0	0	0	0	0	0	0	0	0	0	0	0	0	0	0	0	0	2	0	0	0	0	0	0	0	0	0	0	0	0	0	0	0	0	0
Rv1246c|AJW48790.1|UB21_06650|ARN05840.1|BJM02_06620|Toxin RelE (EC 3.1.-.-) (Putative endoribonuclease RelE)	0	0	0	0	0	0	0	0	0	0	0	0	0	0	0	0	0	0	0	0	0	0	0	0	0	0	0	0	0	0	0	0	0	0	0	0
Rv1247c|AJW48791.1|UB21_06655|ARN05841.1|BJM02_06625|Antitoxin RelB	0	0	0	0	0	0	0	0	0	0	0	2	0	0	0	0	0	0	0	0	0	0	0	0	0	0	0	0	0	0	0	0	0	0	0	0
Rv1249c|AJW48793.1|UB21_06665|ARN05843.1|BJM02_06635|Possible membrane protein	0	0	0	0	0	0	0	0	0	0	0	0	0	0	0	0	0	0	0	0	0	0	0	0	0	0	0	0	0	0	0	0	0	0	0	0
Rv1250|AJW48794.1|UB21_06670|ARN05844.1|BJM02_06640|Uncharacterized MFS-type transporter Rv1250	0	0	0	0	0	0	0	0	0	0	0	0	0	0	0	0	0	0	0	0	0	0	0	0	0	1	0	0	0	0	0	0	0	5	2	0
Rv1251c|AJW48795.1|UB21_06675|ARN05845.1|BJM02_06645|Uncharacterized protein	0	0	0	0	0	0	0	0	0	0	0	0	0	0	0	0	0	0	0	0	0	0	0	0	0	0	2	0	0	0	0	0	0	0	0	0
Rv1252c|AJW48796.1|UB21_06680|ARN05846.1|BJM02_06650|Putative lipoprotein LprE	0	0	0	0	0	0	0	0	0	0	0	0	0	0	0	0	0	0	0	0	0	2	0	0	0	0	0	0	0	0	0	0	0	0	0	0
Rv1253|AJW48797.1|UB21_06685|ARN05847.1|BJM02_06655|ATP-dependent RNA helicase DeaD (EC 3.6.4.13) (Cold-shock DEAD box protein A)	0	0	0	0	0	0	0	0	0	0	0	0	0	0	0	2	0	0	0	0	0	0	0	0	0	0	0	0	0	0	0	0	0	0	0	0
Rv1254|AJW48798.1|UB21_06690|ARN05848.1|BJM02_06660|Probable acyltransferase	0	0	0	0	0	0	0	0	2	0	0	0	0	0	0	0	0	0	0	0	0	0	0	0	0	0	0	0	0	0	0	0	0	0	0	0
Rv1255c|AJW48799.1|UB21_06695|ARN05849.1|BJM02_06665|Uncharacterized HTH-type transcriptional regulator Rv1255c	0	0	0	0	0	0	0	0	0	0	0	0	0	1	0	0	0	0	0	0	0	0	0	0	0	0	0	0	0	0	0	0	0	0	0	0
Rv1256c|AJW48800.1|UB21_06700|ARN05850.1|BJM02_06670|Cytochrome P450 130 (EC 1.14.-.-)	0	0	0	0	0	0	0	0	0	0	0	0	1	0	0	0	0	0	0	0	0	0	0	0	0	0	0	0	0	0	0	0	0	0	0	0
Rv1257c|AJW48801.1|UB21_06705|ARN05851.1|BJM02_06675|Probable oxidoreductase	0	0	0	0	0	0	0	0	0	0	0	0	0	0	2	0	0	0	0	0	0	0	0	0	0	0	0	0	0	0	0	0	0	0	0	0
Rv1260|AJW48804.1|UB21_06725|ARN05854.1|BJM02_06695|Uncharacterized protein Rv1260	2	0	0	2	0	0	0	0	0	0	0	0	2	2	0	0	0	0	0	0	0	0	0	0	0	0	0	0	0	0	0	0	0	0	0	0
Rv1261c|AJW48805.1|UB21_06730|ARN05855.1|BJM02_06700|F420H(2)-dependent quinone reductase Rv1261c (Fqr) (EC 1.1.98.-)	0	0	0	0	0	0	0	0	0	0	0	0	0	0	0	0	0	0	0	0	0	0	0	0	1	0	0	0	0	0	0	0	0	0	0	2
Rv1262c|AJW48806.1|UB21_06735|ARN05856.1|BJM02_06705|Uncharacterized HIT-like protein Rv1262c	0	2	0	0	0	0	0	0	0	0	0	0	0	0	0	0	0	0	0	0	0	0	2	2	1	0	0	0	0	0	0	0	0	0	0	0
Rv1263|AJW48807.1|UB21_06740|ARN05857.1|BJM02_06710|Putative amidase AmiB2 (EC 3.5.1.4)	0	0	0	0	2	0	0	0	0	0	0	1	1	0	0	1	1	1	2	2	2	3	2	0	0	1	2	3	0	1	0	1	0	0	0	0
Rv1264|AJW48808.1|UB21_06745|ARN05858.1|BJM02_06715|pH-sensitive adenylate cyclase Rv1264 (EC 4.6.1.1) (ATP pyrophosphate-lyase) (Adenylyl cyclase)	0	0	0	0	0	0	0	0	0	0	0	0	0	0	0	4	0	0	0	0	0	0	0	0	0	0	0	0	0	0	2	0	2	0	0	0
Rv1265|AJW48809.1|UB21_06750|ARN05859.1|BJM02_06720|Uncharacterized protein Rv1265	0	0	0	0	0	0	0	0	0	0	0	0	0	0	0	0	0	0	0	0	0	0	0	0	2	0	0	2	0	0	0	0	0	0	0	0
Rv1267c|AJW48810.1|UB21_06760|ARN05861.1|BJM02_06730|Transcriptional regulatory protein EmbR	0	0	0	0	0	0	0	0	0	0	0	0	0	0	0	0	0	0	0	0	1	0	0	0	0	0	0	0	0	0	0	0	0	0	0	0
Rv1268c|AJW48811.1|UB21_06765|ARN05862.1|BJM02_06735|Uncharacterized protein Rv1268c	0	0	0	0	0	0	0	0	0	0	0	0	0	0	0	0	0	0	0	0	0	0	0	0	0	0	0	0	0	0	0	0	0	0	0	0
Rv1270c|AJW51197.1|UB21_06770|ARN08368.1|BJM02_06740|Lipoprotein LprA	0	0	0	0	0	0	0	0	0	0	0	0	0	0	0	0	0	0	0	0	0	0	0	0	0	0	0	0	0	0	0	0	0	0	0	0
Rv1271c|AJW48812.1|UB21_06775|ARN05863.1|BJM02_06745|Uncharacterized protein Rv1271c	0	0	0	0	0	0	0	0	0	0	2	0	0	0	0	0	0	0	0	0	0	0	0	0	0	0	0	0	0	0	0	0	0	0	0	0
Rv1272c|AJW48813.1|UB21_06780|ARN05864.1|BJM02_06750|Fatty acid ABC transporter ATP-binding/permease protein (EC 7.6.2.-)	0	0	0	0	0	0	0	0	0	0	0	0	0	0	0	2	0	0	0	0	0	0	0	0	0	1	0	0	0	0	0	0	1	1	0	0
Rv1273c|AJW48814.1|UB21_06785|ARN05865.1|BJM02_06755|Uncharacterized ABC transporter ATP-binding protein Rv1273c	0	0	0	0	0	0	0	0	0	0	0	0	0	0	0	0	0	0	0	0	0	0	0	0	0	0	0	0	0	0	0	0	0	0	0	0
Rv1274|AJW51198.1|UB21_06790|ARN08369.1|BJM02_06760|Putative lipoprotein LprB	0	0	0	0	0	0	0	0	0	0	0	0	0	0	0	0	0	0	0	0	0	0	0	0	0	0	0	0	0	0	0	0	0	2	0	0
Rv1275|AJW48815.1|UB21_06795|ARN05866.1|BJM02_06765|Possible lipoprotein LprC	0	0	0	0	0	0	0	0	0	0	0	0	0	0	0	0	0	0	0	0	0	0	0	0	0	0	0	0	0	0	0	0	0	0	0	0
Rv1276c|AJW48816.1|UB21_06800|ARN05867.1|BJM02_06770|Uncharacterized protein Rv1276c (EC 3.1.3.-)	0	0	0	0	0	0	0	0	0	0	0	0	0	0	0	0	0	0	0	0	0	0	0	0	0	0	0	0	0	0	0	0	0	0	0	0
Rv1277|AJW48817.1|UB21_06805|ARN05868.1|BJM02_06775|Metallophos domain-containing protein	0	0	0	0	0	0	0	0	0	0	2	0	0	0	0	0	2	0	0	0	0	0	0	0	0	0	0	0	0	2	0	0	0	0	0	0
Rv1278|AJW48818.1|UB21_06810|ARN05869.1|BJM02_06780|Uncharacterized protein Rv1278	0	0	0	0	0	0	0	0	0	0	0	0	0	0	0	0	0	0	0	0	0	0	2	0	0	0	0	0	0	0	0	0	0	0	0	0
Rv1279|AJW51199.1|UB21_06815|ARN08370.1|BJM02_06785|Uncharacterized GMC-type oxidoreductase Rv1279 (EC 1.1.-.-)	0	2	0	0	0	0	0	0	2	0	0	0	0	0	0	0	0	0	2	0	0	0	0	0	0	0	2	2	0	0	0	0	0	0	0	0
Rv1280c|AJW48819.1|UB21_06820|ARN05870.1|BJM02_06790|Uncharacterized protein Rv1280c	5	6	3	0	3	1	0	2	2	1	0	4	2	0	0	0	1	1	1	0	2	2	0	0	3	1	0	1	0	0	3	0	0	0	2	0
Rv1281c|AJW48820.1|UB21_06825|ARN05871.1|BJM02_06795|Uncharacterized ABC transporter ATP-binding protein Rv1281c	0	0	0	0	0	0	0	0	0	0	0	0	0	0	0	0	0	0	0	0	0	0	0	0	0	0	0	0	0	0	0	0	0	2	2	0
Rv1282c|AJW48821.1|UB21_06830|ARN05872.1|BJM02_06800|Putative peptide transport permease protein Rv1282c	0	0	2	0	0	0	0	0	0	0	0	0	0	0	0	0	0	0	0	0	0	0	0	0	0	0	0	0	0	0	0	0	0	0	0	0
Rv1283c|AJW48822.1|UB21_06835|ARN05873.1|BJM02_06805|Putative peptide transport permease protein Rv1283c	0	0	0	0	0	0	0	0	0	0	2	0	0	0	0	0	0	0	0	0	0	0	0	0	0	0	0	0	0	0	0	0	0	0	0	0
Rv1284|AJW48823.1|UB21_06840|ARN05874.1|BJM02_06810|Beta-carbonic anhydrase 1 (Beta-CA 1) (EC 4.2.1.1) (Carbonate dehydratase 1) (mtCA 1)	2	0	0	0	0	0	0	0	0	0	0	0	0	2	0	0	0	0	1	2	2	4	0	0	0	0	0	0	0	0	0	2	0	0	0	4
Rv1285|AJW51200.1|UB21_06845|ARN08371.1|BJM02_06815|Sulfate adenylyltransferase subunit 2 (EC 2.7.7.4) (ATP-sulfurylase small subunit) (Sulfate adenylate transferase) (SAT)	2	0	0	2	1	0	0	0	0	0	0	0	0	0	0	0	0	0	0	0	0	0	0	0	0	0	0	0	0	1	2	0	0	0	0	0
Rv1286|AJW48824.1|UB21_06850|ARN05875.1|BJM02_06820|Bifunctional enzyme CysN/CysC [Includes: Sulfate adenylyltransferase subunit 1 (EC 2.7.7.4) (ATP-sulfurylase large subunit) (Sulfate adenylate transferase) (SAT); Adenylyl-sulfate kinase (EC 2.7.1.25) (APS kinase) (ATP adenosine-5'-phosphosulfate 3'-phosphotransferase)]	0	2	2	0	0	0	0	0	2	0	0	0	0	0	0	0	2	2	0	0	0	0	0	0	0	0	0	0	0	0	0	0	0	2	0	2
Rv1287|AJW48825.1|UB21_06855|ARN05876.1|BJM02_06825|Putative HTH-type transcriptional regulator Rv1287	0	0	0	0	0	0	0	0	0	2	0	0	0	0	0	0	0	0	0	0	0	0	0	0	0	0	0	0	0	0	0	0	0	0	0	0
Rv1288|AJW48826.1|UB21_06860|ARN05877.1|BJM02_06830|Esterase Rv1288 (EC 3.1.1.-)	0	0	0	1	0	0	0	0	0	0	0	0	0	0	0	0	0	0	0	0	0	0	0	0	0	0	0	0	0	0	0	0	0	0	0	0
Rv1290A|AJW48828.1|UB21_06875|ARN05880.1|BJM02_06845|Uncharacterized protein	0	0	0	0	0	0	0	0	0	0	0	0	0	0	0	0	0	0	0	0	0	0	0	0	0	0	0	0	0	2	0	0	0	0	0	0
Rv1290c|AJW48827.1|UB21_06870|ARN05879.1|BJM02_06840|Uncharacterized protein Rv1290c	0	2	0	0	0	0	0	0	0	0	0	0	0	0	0	0	0	0	0	0	0	0	0	0	0	0	0	0	0	0	0	0	0	0	0	0
Rv1291c|AJW48829.1|UB21_06880|ARN05881.1|BJM02_06850|Uncharacterized protein Rv1291c	0	0	0	0	0	0	0	0	0	0	0	0	0	0	0	0	0	0	0	0	0	0	0	0	0	0	0	0	0	0	0	0	0	0	0	0
Rv1292|AJW48830.1|UB21_06890|ARN05882.1|BJM02_06860|Arginine--tRNA ligase (EC 6.1.1.19) (Arginyl-tRNA synthetase) (ArgRS)	0	0	0	0	0	0	0	0	0	0	0	0	0	0	2	0	0	1	0	0	0	0	0	0	0	0	0	0	2	0	0	0	0	0	0	0
Rv1293|AJW48831.1|UB21_06895|ARN05883.1|BJM02_06865|Diaminopimelate decarboxylase (DAP decarboxylase) (DAPDC) (EC 4.1.1.20)	0	0	0	0	0	0	0	0	0	0	0	0	0	0	0	0	0	0	0	0	0	0	0	0	0	0	0	0	0	0	0	0	0	0	0	0
Rv1294|AJW48832.1|UB21_06900|ARN05884.1|BJM02_06870|Homoserine dehydrogenase (HDH) (EC 1.1.1.3)	0	2	0	1	0	0	0	0	0	0	0	0	2	2	0	0	0	1	0	0	2	0	0	0	0	0	0	0	0	0	0	0	0	0	0	0
Rv1295|AJW48833.1|UB21_06905|ARN05885.1|BJM02_06875|Threonine synthase (TS) (EC 4.2.3.1)	0	0	2	0	0	0	0	2	0	0	0	0	0	0	0	0	0	0	4	0	0	0	1	0	0	0	0	0	0	0	0	2	0	0	0	0
Rv1296|AJW48834.1|UB21_06910|ARN05886.1|BJM02_06880|Homoserine kinase (HK) (HSK) (EC 2.7.1.39)	0	0	0	0	0	0	0	0	0	0	4	0	0	0	0	0	0	0	0	0	0	0	0	0	0	0	0	0	0	0	0	0	0	0	0	0
Rv1297|AJW48836.1|UB21_06920|ARN05888.1|BJM02_06890|Transcription termination factor Rho (EC 3.6.4.-) (ATP-dependent helicase Rho)	0	0	0	2	0	0	0	0	2	0	0	0	2	0	0	2	0	2	0	0	0	0	0	0	2	0	2	0	2	0	0	0	0	0	0	0
Rv1298|AJW48837.1|UB21_06925|ARN05889.1|BJM02_06895|50S ribosomal protein L31	0	1	0	0	0	0	0	0	2	0	0	0	1	0	2	0	0	0	0	0	0	0	1	0	2	0	5	0	0	0	2	0	0	0	0	2
Rv1300|AJW48838.1|UB21_06935|ARN05891.1|BJM02_06905|Release factor glutamine methyltransferase (RF MTase) (EC 2.1.1.297) (M.MtuHHemKP) (N5-glutamine methyltransferase PrmC) (Protein-(glutamine-N5) MTase PrmC) (Protein-glutamine N-methyltransferase PrmC)	2	0	0	0	0	0	0	0	0	0	0	0	0	1	0	0	0	0	0	0	0	2	0	0	0	0	0	0	4	0	0	0	0	0	0	0
Rv1301|AJW48839.1|UB21_06940|ARN05892.1|BJM02_06910|Putative threonylcarbamoyl-AMP synthase (TC-AMP synthase) (EC 2.7.7.87) (L-threonylcarbamoyladenylate synthase) (tRNA threonylcarbamoyladenosine biosynthesis protein Rv1301)	0	0	0	0	0	0	0	0	0	0	0	0	0	0	0	0	0	0	0	0	0	0	0	1	0	0	0	0	2	0	0	0	2	0	2	0
Rv1302|AJW51201.1|UB21_06945|ARN08372.1|BJM02_06915|Decaprenyl-phosphate N-acetylglucosaminephosphotransferase (EC 2.7.8.35) (Decaprenyl-phosphate GlcNAc-1-phosphate transferase) (Decaprenyl-phosphate alpha-N-acetylglucosaminyl 1-phosphate transferase) (UDP-GlcNAc:decaprenyl-phosphate GlcNAc-1-phosphate transferase)	0	0	0	0	0	0	0	0	0	0	0	0	0	0	0	0	0	0	0	0	0	0	0	0	0	0	0	0	0	0	0	0	0	0	0	0
Rv1303|AJW48840.1|UB21_06950|ARN05893.1|BJM02_06920|Uncharacterized protein Rv1303	0	0	0	0	0	0	0	2	0	0	0	0	0	2	0	0	0	0	0	0	0	0	0	0	0	0	0	0	0	0	0	0	0	0	0	0
Rv1304|AJW48841.1|UB21_06955|ARN05894.1|BJM02_06925|ATP synthase subunit a (ATP synthase F0 sector subunit a) (F-ATPase subunit 6)	0	0	0	0	0	0	0	0	0	0	0	0	0	0	0	0	0	0	0	0	0	0	0	0	0	0	0	0	0	0	2	0	0	0	0	0
Rv1305|AJW51202.1|UB21_06960|ARN08373.1|BJM02_06930|ATP synthase subunit c (ATP synthase F(0) sector subunit c) (F-type ATPase subunit c) (F-ATPase subunit c) (Lipid-binding protein)	0	0	0	0	0	0	0	0	0	0	0	0	0	0	0	0	0	0	0	0	0	0	0	0	0	2	0	1	0	0	0	0	0	0	0	0
Rv1306|AJW48842.1|UB21_06965|ARN05895.1|BJM02_06935|ATP synthase subunit b (ATP synthase F(0) sector subunit b) (ATPase subunit I) (F-type ATPase subunit b) (F-ATPase subunit b)	0	0	1	2	0	0	0	0	0	0	2	0	0	2	0	0	0	0	0	0	0	2	0	0	0	0	0	1	0	0	0	0	1	0	0	0
Rv1307|AJW48843.1|UB21_06970|ARN05896.1|BJM02_06940|ATP synthase subunit b-delta [Includes: ATP synthase subunit b (ATP synthase F(0) sector subunit b 2) (ATPase subunit I 2) (F-type ATPase subunit b 2) (F-ATPase subunit b 2); ATP synthase subunit delta (ATP synthase F(1) sector subunit delta) (F-type ATPase subunit delta) (F-ATPase subunit delta)]	0	0	0	2	0	0	0	1	0	0	0	0	0	0	0	2	0	0	0	0	0	1	2	0	1	0	0	0	0	0	1	0	3	0	3	0
Rv1308|AJW48844.1|UB21_06975|ARN05897.1|BJM02_06945|ATP synthase subunit alpha (EC 7.1.2.2) (ATP synthase F1 sector subunit alpha) (F-ATPase subunit alpha)	0	2	4	2	0	0	0	0	0	0	0	0	0	0	2	0	0	0	0	0	0	0	0	2	0	0	0	2	0	2	0	2	2	0	0	0
Rv1309|AJW48845.1|UB21_06980|ARN05898.1|BJM02_06950|ATP synthase gamma chain (ATP synthase F1 sector gamma subunit) (F-ATPase gamma subunit)	0	0	0	0	2	0	2	0	0	0	0	0	0	0	0	1	0	0	0	0	0	0	2	0	0	0	0	0	0	0	0	0	0	0	0	0
Rv1310|AJW48846.1|UB21_06985|ARN05899.1|BJM02_06955|ATP synthase subunit beta (EC 7.1.2.2) (ATP synthase F1 sector subunit beta) (F-ATPase subunit beta)	0	0	0	0	0	0	0	0	2	0	0	0	0	0	0	0	0	0	0	0	2	0	2	0	0	0	0	0	0	2	0	0	0	0	0	0
Rv1311|AJW48847.1|UB21_06990|ARN05900.1|BJM02_06960|ATP synthase epsilon chain (ATP synthase F1 sector epsilon subunit) (F-ATPase epsilon subunit)	0	0	0	0	0	0	0	0	0	0	0	0	0	0	0	0	0	0	0	0	0	0	0	0	0	0	0	0	0	0	0	0	0	0	0	0
Rv1312|AJW48848.1|UB21_06995|ARN05901.1|BJM02_06965|Uncharacterized protein Rv1312	0	0	0	1	0	0	0	0	0	0	0	0	0	0	0	0	0	0	0	2	0	0	0	0	0	0	0	0	0	0	0	0	0	0	0	0
Rv1313c|AJW50939.1|UB21_20170|ARN05902.1|BJM02_06970|Transposase for insertion sequence element IS1557	0	0	0	0	0	0	0	0	0	0	0	0	0	0	1	0	0	0	0	0	0	0	0	0	0	0	1	0	0	0	0	1	0	0	0	1
Rv1314c|AJW48850.1|UB21_07010|ARN05903.1|BJM02_06975|Corrinoid adenosyltransferase (EC 2.5.1.17) (Cob(II)alamin adenosyltransferase) (Cob(II)yrinic acid a,c-diamide adenosyltransferase) (Cobinamide/cobalamin adenosyltransferase)	0	0	0	0	0	0	0	0	0	0	0	0	0	0	0	0	0	0	0	0	0	0	0	0	0	0	0	0	0	0	0	0	0	0	0	0
Rv1315|AJW48851.1|UB21_07015|ARN05904.1|BJM02_06980|UDP-N-acetylglucosamine 1-carboxyvinyltransferase (EC 2.5.1.7) (Enoylpyruvate transferase) (UDP-N-acetylglucosamine enolpyruvyl transferase) (EPT)	0	0	0	0	0	0	0	0	0	0	0	0	0	0	0	2	0	0	2	0	0	0	2	0	0	0	0	0	0	2	0	4	0	0	0	0
Rv1316c|AJW48852.1|UB21_07035|ARN05905.1|BJM02_07000|Methylated-DNA--protein-cysteine methyltransferase (EC 2.1.1.63) (6-O-methylguanine-DNA methyltransferase) (MGMT) (O-6-methylguanine-DNA-alkyltransferase)	0	0	2	0	0	0	0	0	0	0	0	0	0	0	0	0	0	0	0	0	0	0	0	0	0	0	0	0	0	0	0	0	0	0	0	0
Rv1317c|AJW48853.1|UB21_07040|ARN05906.1|BJM02_07005|Probable bifunctional transcriptional activator/DNA repair enzyme AlkA (Regulatory protein AlkA) [Includes: Methylphosphotriester-DNA--protein-cysteine S-methyltransferase (EC 2.1.1.n11) (Methylphosphotriester-DNA methyltransferase); DNA-3-methyladenine glycosylase (EC 3.2.2.21) (DNA-3-methyladenine glycosidase)]	0	0	0	0	0	0	0	0	0	0	0	0	0	0	0	0	0	0	0	0	0	0	0	0	0	0	0	0	0	0	0	0	0	0	0	2
Rv1318c|AJW48854.1|UB21_07045|ARN05907.1|BJM02_07010|Uncharacterized protein Rv1318c	0	0	0	0	0	0	0	0	0	0	1	0	0	0	0	0	0	0	0	0	0	0	0	0	0	0	0	0	0	0	2	0	0	0	0	0
Rv1319c|AJW48856.1|UB21_07055|ARN05909.1|BJM02_07020|Uncharacterized protein Rv1319c	0	0	0	0	0	0	0	0	0	0	0	0	0	0	0	0	0	0	0	0	0	0	0	0	0	0	0	0	0	0	0	0	0	0	0	0
Rv1320c|AJW48857.1|UB21_07060|ARN05910.1|BJM02_07025|Uncharacterized protein Rv1320c	0	0	0	0	0	0	0	0	0	0	0	0	0	0	0	0	0	0	0	0	0	0	0	0	0	0	0	0	0	2	0	0	0	0	0	0
Rv1321|AJW48858.1|UB21_07065|ARN05911.1|BJM02_07030|Endonuclease NucS (EC 3.1.-.-)	2	2	0	0	0	0	0	0	0	0	0	0	0	0	0	0	0	0	0	0	0	0	2	0	0	0	0	0	0	0	0	0	0	0	0	0
Rv1322|AJW48859.1|UB21_07070|ARN05912.1|BJM02_07035|Uncharacterized protein Rv1322	0	0	0	0	0	0	0	0	0	0	0	0	0	0	1	0	0	0	0	0	0	0	0	0	0	0	0	0	0	0	0	0	0	0	0	0
Rv1322A|AJW48860.1|UB21_07075|ARN05913.1|BJM02_07040|Conserved protein	0	3	4	0	0	0	0	0	0	0	0	0	0	2	3	0	2	0	2	0	0	0	2	0	0	0	3	2	0	0	0	4	2	0	0	0
Rv1323|AJW48861.1|UB21_07080|ARN05914.1|BJM02_07045|Probable acetyl-CoA acetyltransferase (EC 2.3.1.9) (Acetoacetyl-CoA thiolase)	0	2	0	0	0	0	0	0	0	0	0	2	2	2	2	2	0	1	0	0	0	0	0	2	0	2	0	0	0	2	0	0	0	0	0	0
Rv1324|AJW48862.1|UB21_07085|ARN05915.1|BJM02_07050|Uncharacterized protein Rv1324	2	0	2	0	0	0	0	0	0	0	0	0	0	0	0	0	0	0	0	0	2	0	0	0	0	0	2	0	0	0	0	0	0	0	0	0
Rv1326c|AJW48864.1|UB21_07100|ARN05917.1|BJM02_07065|1,4-alpha-glucan branching enzyme GlgB (EC 2.4.1.18) (1,4-alpha-D-glucan:1,4-alpha-D-glucan 6-glucosyl-transferase) (Alpha-(1->4)-glucan branching enzyme) (Glycogen-branching enzyme) (BE)	0	0	1	0	0	0	0	0	0	0	0	0	0	0	0	0	0	0	0	0	2	0	0	0	0	0	0	0	0	0	0	0	0	0	0	0
Rv1327c|AJW51204.1|UB21_07105|ARN08374.1|BJM02_07070|Alpha-1,4-glucan:maltose-1-phosphate maltosyltransferase (GMPMT) (EC 2.4.99.16) ((1->4)-alpha-D-glucan:maltose-1-phosphate alpha-D-maltosyltransferase) ((1->4)-alpha-D-glucan:phosphate alpha-D-maltosyltransferase)	0	0	0	0	0	0	0	0	0	0	0	0	0	0	2	0	0	0	0	0	0	0	0	0	2	0	0	0	0	0	0	0	2	0	0	0
Rv1328|AJW48865.1|UB21_07110|ARN05918.1|BJM02_07075|Glycogen phosphorylase (EC 2.4.1.1)	0	0	0	0	2	0	0	0	0	0	0	2	0	2	2	0	0	0	0	0	2	0	2	2	0	2	0	0	0	0	0	0	0	0	0	0
Rv1329c|AJW48866.1|UB21_07115|ARN05919.1|BJM02_07080|Probable ATP-dependent helicase DinG homolog (EC 3.6.4.12)	0	0	0	2	0	0	0	0	0	0	0	2	0	0	0	0	0	0	0	0	0	0	0	0	0	0	0	0	0	0	0	0	0	0	0	0
Rv1331|AJW48867.1|UB21_07125|ARN05921.1|BJM02_07090|ATP-dependent Clp protease adapter protein ClpS	1	0	2	0	0	0	0	0	0	0	0	0	0	0	0	0	2	0	0	0	0	0	0	0	2	0	0	0	2	0	0	2	0	0	0	0
Rv1332|AJW48868.1|UB21_07130|ARN05922.1|BJM02_07095|Uncharacterized protein Rv1332	0	0	0	0	0	0	0	0	0	0	0	0	0	0	0	0	0	0	0	0	0	0	0	0	2	0	0	0	0	0	0	0	0	0	0	0
Rv1333|AJW48869.1|UB21_07135|ARN05923.1|BJM02_07100|Uncharacterized aminopeptidase Rv1333 (EC 3.4.11.-)	12	8	6	1	4	7	1	1	2	0	0	1	0	0	3	0	4	5	2	2	0	0	0	0	3	7	6	6	4	0	1	0	1	2	0	0
Rv1334|AJW48870.1|UB21_07140|ARN05924.1|BJM02_07105|CysO-cysteine peptidase (EC 3.13.1.6) (Metallocarboxypeptidase Mec)	0	0	0	0	0	0	0	0	0	0	0	0	0	0	0	0	0	0	0	0	0	0	0	0	0	0	0	0	0	0	0	0	0	0	0	0
Rv1335|AJW48871.1|UB21_07145|ARN05925.1|BJM02_07110|Sulfur carrier protein CysO (9.5 kDa culture filtrate antigen cfp10A)	0	0	0	2	0	0	0	0	0	0	0	0	0	0	0	0	0	0	0	0	0	0	0	0	0	0	0	0	0	0	0	0	0	0	0	0
Rv1337|AJW48873.1|UB21_07155|ARN05927.1|BJM02_07120|Uncharacterized protein Rv1337	0	0	0	0	0	0	0	0	0	0	0	0	0	0	0	0	0	0	0	0	0	0	0	0	0	0	0	0	0	0	0	0	0	0	0	0
Rv1338|AJW48874.1|UB21_07160|ARN05928.1|BJM02_07125|Glutamate racemase (EC 5.1.1.3)	2	4	4	0	1	2	0	0	5	4	5	2	0	0	1	0	3	2	2	3	1	2	4	2	1	1	1	2	1	0	1	4	1	0	1	0
Rv1339|AJW48875.1|UB21_07165|ARN05929.1|BJM02_07130|Uncharacterized protein Rv1339	0	0	0	0	0	0	0	0	0	0	0	0	0	0	0	0	0	0	0	0	0	0	0	0	0	0	0	0	0	0	0	0	0	0	0	0
Rv1341|AJW51205.1|UB21_07175|ARN08375.1|BJM02_07140|dITP/XTP pyrophosphatase (EC 3.6.1.66) (Non-canonical purine NTP pyrophosphatase) (Non-standard purine NTP pyrophosphatase) (Nucleoside-triphosphate diphosphatase) (Nucleoside-triphosphate pyrophosphatase) (NTPase)	0	0	0	0	0	0	0	0	0	0	0	0	0	0	0	0	0	0	0	1	0	0	0	0	0	0	0	0	0	0	0	0	0	0	0	0
Rv1342c|AJW48877.1|UB21_07180|ARN05931.1|BJM02_07145|Uncharacterized protein Rv1342c	0	0	0	0	0	0	0	0	0	0	0	0	0	0	0	0	0	1	0	0	0	0	3	2	0	0	0	4	0	0	1	0	0	0	2	2
Rv1343c|AJW48878.1|UB21_07185|ARN05932.1|BJM02_07150|Putative lipoprotein LprD	0	0	0	0	0	0	0	0	0	0	0	0	0	0	0	0	0	0	0	0	0	0	0	2	0	0	1	0	0	0	0	0	0	0	0	0
Rv1344|AJW48879.1|UB21_07190|ARN05933.1|BJM02_07155|Acyl carrier protein MbtL (ACP) (Mycobactin synthase protein L)	0	0	0	0	0	0	0	0	0	0	0	0	0	2	0	0	2	0	0	0	0	0	0	0	0	0	0	0	0	0	0	0	0	0	0	2
Rv1345|AJW48880.1|UB21_07195|ARN05934.1|BJM02_07160|Medium/long-chain-fatty-acid--[acyl-carrier-protein] ligase MbtM (EC 6.2.1.20) (EC 6.2.1.47) (Fatty acyl-[acyl-carrier-protein] synthetase) (Fatty acyl-ACP synthetase) (Mycobactin synthetase protein M)	0	0	0	0	0	0	0	0	0	0	0	0	0	4	0	0	0	0	0	0	2	0	0	0	4	0	3	6	0	0	0	2	2	0	4	0
Rv1346|AJW48881.1|UB21_07200|ARN05935.1|BJM02_07165|Acyl-[acyl-carrier-protein] dehydrogenase MbtN (Acyl-ACP dehydrogenase MbtN) (EC 1.3.99.-) (Mycobactin synthase protein N)	0	0	0	0	0	0	0	0	0	0	0	0	2	2	0	2	0	0	0	0	0	0	2	0	0	0	2	2	0	0	0	0	0	6	1	2
Rv1347c|AJW48882.1|UB21_07205|ARN05936.1|BJM02_07170|Lysine N-acyltransferase MbtK (N-acyltransferase MbtK) (EC 2.3.1.-) (Mycobactin synthase protein K)	0	0	0	0	0	0	0	0	0	0	0	0	0	0	0	0	0	0	0	0	0	0	0	0	0	0	0	0	0	0	0	1	1	0	0	1
Rv1348|AJW48883.1|UB21_07215|ARN05937.1|BJM02_07180|Mycobactin import ATP-binding/permease protein IrtA (EC 7.2.2.-) (Iron-regulated transporter A)	2	3	1	4	1	0	0	1	0	1	0	1	0	1	2	0	0	0	0	1	0	0	0	1	2	2	1	0	1	0	2	0	0	1	0	0
Rv1349|AJW48884.1|UB21_07220|ARN05938.1|BJM02_07185|Mycobactin import ATP-binding/permease protein IrtB (EC 7.2.2.-) (Iron-regulated transporter B)	0	0	0	0	0	0	0	0	0	0	0	0	0	0	0	0	0	0	0	0	0	0	0	0	0	0	0	0	0	0	0	0	0	0	0	0
Rv1350|AJW48885.1|UB21_07225|ARN05939.1|BJM02_07190|Uncharacterized oxidoreductase Rv1350 (EC 1.-.-.-)	0	0	0	0	0	0	0	0	0	0	0	0	0	0	0	0	0	0	0	0	0	0	0	0	0	0	0	0	0	0	0	0	0	0	0	0
Rv1351|AJW48886.1|UB21_07230|ARN05940.1|BJM02_07195|Uncharacterized protein Rv1351	0	0	0	0	0	0	0	0	0	0	0	0	0	0	0	0	0	0	0	0	0	0	0	0	0	2	0	0	0	0	0	0	0	0	0	0
Rv1352|AJW48887.1|UB21_07235|ARN05941.1|BJM02_07200|Uncharacterized protein Rv1352	0	1	0	1	0	0	0	0	0	0	0	2	0	0	2	0	1	0	0	0	0	0	0	0	0	0	2	0	0	0	0	0	0	1	0	1
Rv1353c|AJW48888.1|UB21_07240|ARN05942.1|BJM02_07205|HTH-type transcriptional repressor Rv1353c	0	0	0	0	0	0	0	0	0	0	0	0	0	0	0	0	0	0	0	0	0	0	0	0	0	0	0	0	0	0	0	0	0	0	0	0
Rv1354c|AJW48889.1|UB21_07245|ARN05943.1|BJM02_07210|Uncharacterized protein Rv1354c	0	0	0	2	0	0	0	0	0	0	0	0	0	0	0	0	0	0	0	0	0	0	0	0	0	0	0	0	0	0	0	0	0	0	0	0
Rv1355c|AJW51206.1|UB21_07250|ARN05944.1|BJM02_07215|Uncharacterized protein Rv1355c	0	0	0	0	0	0	0	0	0	0	0	0	0	0	0	0	0	0	0	0	0	0	0	0	0	0	0	0	0	0	0	0	0	0	0	0
Rv1357c|AJW48890.1|UB21_07260|ARN05946.1|BJM02_07225|Uncharacterized protein Rv1357c	0	0	0	0	0	0	0	0	0	0	0	0	0	0	2	0	0	1	0	0	0	0	0	0	0	0	0	0	0	0	0	0	0	2	0	0
Rv1358|AJW48891.1|UB21_07265|ARN05947.1|BJM02_07230|Probable transcriptional regulatory protein	0	0	1	0	0	0	0	0	0	0	0	0	0	0	0	0	0	0	0	0	0	0	0	2	0	0	0	0	0	0	0	0	0	0	0	0
Rv1359|AJW48892.1|UB21_07270|ARN05948.1|BJM02_07235|Uncharacterized protein Rv1359	0	0	0	0	0	0	0	0	0	0	0	0	0	0	0	0	0	0	0	0	0	0	0	0	0	0	0	0	0	0	2	0	2	0	0	0
Rv1360|AJW48894.1|UB21_07280|ARN05950.1|BJM02_07245|Uncharacterized protein Rv1360	0	0	0	0	0	0	0	0	0	0	0	0	0	0	0	0	0	0	0	0	0	0	0	0	0	0	0	0	0	0	0	0	0	0	0	0
Rv1361c|AJW48895.1|UB21_07285|ARN05951.1|BJM02_07250|Uncharacterized PPE family protein PPE19	0	2	0	0	0	0	0	0	0	0	0	2	0	0	1	0	0	0	0	0	0	0	0	0	0	0	0	0	0	1	0	0	0	0	0	0
Rv1362c|AJW48896.1|UB21_07290|ARN08376.1|BJM02_07255|Uncharacterized protein Rv1362c	0	0	0	0	0	0	0	0	0	0	0	0	0	0	0	0	0	0	0	0	0	0	0	0	0	0	0	0	0	0	0	0	0	0	0	0
Rv1363c|AJW48897.1|UB21_07295|ARN05952.1|BJM02_07260|Uncharacterized protein Rv1363c	0	0	0	0	0	0	0	0	0	0	0	0	0	0	0	0	0	0	0	1	0	0	0	0	0	0	0	0	0	0	0	0	0	0	0	0
Rv1364c|AJW48898.1|UB21_07300|ARN05953.1|BJM02_07265|Multidomain regulatory protein Rv1364c (Anti-sigma-F factor Rv1364c) (Anti-SigF factor) (Protein-serine/threonine phosphatase) (EC 3.1.3.16) (Putative multidomain regulator of SigF) (MursiF) (Serine/threonine-protein kinase) (EC 2.7.11.1)	1	0	0	1	0	0	0	0	0	0	0	0	2	0	0	0	0	0	0	0	0	0	0	0	0	2	0	0	0	0	0	0	0	0	0	0
Rv1365c|AJW48899.1|UB21_07305|ARN05954.1|BJM02_07270|Anti-sigma-F factor antagonist RsfA (Anti-anti-sigma F factor RsfA)	0	0	0	0	0	0	0	0	0	0	0	0	0	0	0	0	0	0	0	0	0	0	0	0	0	0	0	0	0	0	0	0	0	0	0	0
Rv1366|AJW48900.1|UB21_07310|ARN05955.1|BJM02_07275|Uncharacterized protein Rv1366	0	0	0	0	0	2	0	0	0	0	0	0	0	0	0	0	0	0	0	0	0	0	0	0	0	0	0	0	0	0	0	0	0	0	0	0
Rv1366A|AJW48901.1|UB21_07315|ARN05956.1|BJM02_07280|Conserved protein	0	0	0	0	0	0	0	0	0	0	0	0	0	0	0	0	0	0	0	0	0	0	0	0	0	0	0	0	0	0	0	0	0	0	0	0
Rv1367c|AJW48902.1|UB21_07320|ARN05957.1|BJM02_07285|Uncharacterized protein Rv1367c	0	1	0	0	0	0	0	0	0	0	0	0	0	0	0	0	0	0	0	0	0	0	0	0	0	0	0	2	0	0	0	0	0	0	0	0
Rv1368|AJW48903.1|UB21_07325|ARN05958.1|BJM02_07290|Putative diacylated glycolipid transporter LprF (Lipoprotein LprF)	0	0	0	0	0	0	0	0	0	0	0	0	0	0	2	0	0	0	0	0	0	0	2	0	0	0	0	0	0	0	0	0	0	0	0	0
Rv1371|AJW48906.1|UB21_07345|ARN05961.1|BJM02_07310|Probable conserved membrane protein	0	0	0	0	0	0	0	0	0	0	0	0	0	0	0	0	0	0	0	0	0	0	0	0	0	0	0	0	0	0	0	0	0	0	0	0
Rv1372|AJW48907.1|UB21_07350|ARN05962.1|BJM02_07315|Alpha-pyrone synthesis polyketide synthase-like Pks18 (EC 2.3.1.-) (Alpha-pyrone synthesis polyketide synthase type III Pks18) (Chalcone synthase-like protein) (CHS-like)	0	0	0	0	0	0	0	0	0	0	0	0	0	0	0	0	0	0	0	0	0	0	0	0	0	0	0	0	0	0	0	0	0	0	0	0
Rv1373|AJW51207.1|UB21_07355|ARN08377.1|BJM02_07320|Glycolipid sulfotransferase Rv1373 (EC 2.8.2.-)	0	0	0	0	0	0	0	0	0	0	0	0	0	0	0	0	0	0	0	0	0	0	0	0	0	0	0	0	0	0	0	0	0	0	0	0
Rv1374c|AJW48908.1|UB21_07360|ARN05963.1|BJM02_07325|Uncharacterized protein	0	0	0	0	0	0	0	0	0	0	0	0	0	0	0	0	0	0	0	0	0	0	0	0	0	0	0	2	0	0	0	0	0	0	0	0
Rv1375|AJW48909.1|UB21_07365|ARN05964.1|BJM02_07330|Uncharacterized protein Rv1375	6	2	4	0	0	4	2	1	0	3	0	4	6	0	0	5	0	0	3	0	0	2	1	4	0	0	7	2	2	6	1	2	0	0	6	0
Rv1376|AJW48910.1|UB21_07370|ARN05965.1|BJM02_07335|TfuA domain-containing protein	0	0	0	0	0	0	0	0	0	0	0	0	0	0	0	0	0	0	0	2	0	0	0	0	0	0	0	0	0	0	0	0	0	0	0	0
Rv1377c|AJW48911.1|UB21_07375|ARN05966.1|BJM02_07340|Putative transferase	0	0	0	0	0	0	0	0	0	0	0	0	0	0	0	0	0	0	0	0	0	0	0	0	0	0	1	0	0	0	0	0	0	0	0	0
Rv1378c|AJW48912.1|UB21_07380|ARN05967.1|BJM02_07345|HNHc domain-containing protein	0	0	0	2	0	0	0	0	0	0	0	0	2	0	0	0	0	0	0	0	0	0	0	0	0	0	0	0	0	0	0	0	0	0	0	0
Rv1379|AJW48913.1|UB21_07385|ARN05968.1|BJM02_07350|Bifunctional protein PyrR [Includes: Pyrimidine operon regulatory protein; Uracil phosphoribosyltransferase (UPRTase) (EC 2.4.2.9)]	0	0	0	0	0	0	0	0	0	0	0	0	0	0	0	0	0	0	0	0	0	0	0	0	0	0	0	0	0	0	0	0	0	0	0	0
Rv1380|AJW48914.1|UB21_07390|ARN05969.1|BJM02_07355|Aspartate carbamoyltransferase (EC 2.1.3.2) (Aspartate transcarbamylase) (ATCase)	0	0	0	0	0	0	0	0	0	0	0	0	0	0	0	0	0	0	0	0	0	0	0	0	0	0	0	0	0	0	0	0	0	0	0	0
Rv1382|AJW48916.1|UB21_07400|ARN05971.1|BJM02_07365|Probable export or membrane protein	0	0	0	0	0	0	0	0	0	0	0	0	0	0	0	0	0	0	0	0	0	0	1	0	0	0	0	0	0	0	0	0	0	0	0	0
Rv1383|AJW48917.1|UB21_07405|ARN05972.1|BJM02_07370|Carbamoyl-phosphate synthase small chain (EC 6.3.5.5) (Carbamoyl-phosphate synthetase glutamine chain)	1	0	1	2	0	2	1	0	0	0	1	0	0	1	0	0	13	6	12	16	3	2	2	0	14	27	24	31	0	1	0	1	0	1	0	0
Rv1386|AJW48919.1|UB21_07420|ARN05975.1|BJM02_07385|PE family immunomodulator PE15	0	0	0	0	0	0	0	0	0	0	0	0	0	0	0	0	0	0	2	0	0	0	0	0	0	0	0	0	0	0	0	0	0	0	0	0
Rv1387|AJW48920.1|UB21_07425|ARN05976.1|BJM02_07390|Uncharacterized PPE family protein PPE20	0	0	0	0	0	0	0	0	0	0	0	0	0	0	2	0	0	0	0	0	2	0	0	0	0	0	0	0	0	0	0	0	0	0	0	0
Rv1388|AJW48922.1|UB21_07435|ARN05978.1|BJM02_07400|Putative integration host factor MihF	0	0	0	0	0	0	0	0	0	0	0	0	0	2	2	0	0	0	0	1	4	0	0	0	0	0	0	2	2	0	0	2	0	0	0	0
Rv1389|AJW48923.1|UB21_07440|ARN05979.1|BJM02_07405|Guanylate kinase (EC 2.7.4.8) (GMP kinase)	0	0	0	0	2	0	0	0	0	0	0	0	0	2	2	0	0	0	1	0	0	1	0	0	0	0	0	0	0	0	0	0	0	0	0	2
Rv1390|AJW48924.1|UB21_07445|ARN08378.1|BJM02_07410|DNA-directed RNA polymerase subunit omega (RNAP omega subunit) (EC 2.7.7.6) (RNA polymerase omega subunit) (Transcriptase subunit omega)	0	0	0	0	0	0	0	0	2	0	0	2	0	0	0	0	0	0	0	0	0	0	0	0	0	2	0	0	0	0	0	0	2	0	0	0
Rv1391|AJW51208.1|UB21_07450|ARN08379.1|BJM02_07415|Coenzyme A biosynthesis bifunctional protein CoaBC (DNA/pantothenate metabolism flavoprotein) (Phosphopantothenoylcysteine synthetase/decarboxylase) (PPCS-PPCDC) [Includes: Phosphopantothenoylcysteine decarboxylase (PPC decarboxylase) (PPC-DC) (EC 4.1.1.36) (CoaC); Phosphopantothenate--cysteine ligase (EC 6.3.2.5) (CoaB) (Phosphopantothenoylcyst…	0	0	1	0	0	0	0	0	0	0	0	0	2	0	0	0	0	0	1	0	2	0	0	0	0	0	0	0	0	0	0	0	0	0	1	0
Rv1392|AJW51209.1|UB21_07455|ARN08380.1|BJM02_07420|S-adenosylmethionine synthase (AdoMet synthase) (EC 2.5.1.6) (MAT) (Methionine adenosyltransferase)	2	0	2	0	0	0	0	0	0	0	0	0	0	0	0	2	0	0	3	0	4	2	2	0	4	0	2	2	0	0	2	0	2	0	0	2
Rv1393c|AJW48925.1|UB21_07460|ARN05980.1|BJM02_07425|Probable monoxygenase	0	0	0	0	1	0	0	1	0	1	2	0	0	0	0	0	0	0	2	0	0	0	1	0	0	1	1	0	1	1	0	0	0	0	0	0
Rv1394c|AJW48926.1|UB21_07465|ARN05981.1|BJM02_07430|Putative cytochrome P450 132 (EC 1.14.-.-)	0	0	0	2	0	0	0	0	2	0	0	0	0	0	0	0	0	0	0	0	1	0	0	0	0	0	0	0	0	0	0	0	0	0	0	0
Rv1395|AJW48927.1|UB21_07470|ARN05982.1|BJM02_07435|Uncharacterized HTH-type transcriptional regulator Rv1395	0	0	0	1	0	0	0	0	0	0	0	0	0	0	0	0	0	0	0	0	1	0	0	0	0	0	0	2	0	0	0	0	0	0	0	0
Rv1397c|AJW51210.1|UB21_07485|ARN08381.1|BJM02_07445|Ribonuclease VapC10 (RNase VapC10) (EC 3.1.-.-) (Toxin VapC10)	0	0	0	0	0	0	0	0	0	0	0	0	0	0	0	0	0	0	0	0	0	0	0	2	0	0	0	0	1	0	0	0	0	0	0	0
Rv1398c|AJW48928.1|UB21_07490|ARN05983.1|BJM02_07450|Putative antitoxin VapB10	0	0	0	0	0	0	0	0	0	0	0	0	0	0	0	0	0	0	0	2	0	0	0	0	0	0	0	0	3	0	0	0	0	0	0	0
Rv1399c|AJW48929.1|UB21_07495|ARN05984.1|BJM02_07455|Carboxylesterase NlhH (EC 3.1.1.1) (NLH-H)	0	0	0	0	0	0	0	0	0	0	0	0	0	0	0	0	0	0	0	0	0	0	0	0	0	0	0	0	0	0	0	0	0	0	0	0
Rv1400c|AJW48930.1|UB21_07500|*|*|Esterase LipI (EC 3.1.1.-)	0	0	0	0	0	0	0	0	0	0	0	0	0	0	0	0	0	0	0	0	0	0	0	0	0	0	1	0	0	0	0	0	0	0	0	0
Rv1401|AJW51211.1|UB21_07505|ARN08382.1|BJM02_07465|Uncharacterized membrane protein Rv1401	0	0	0	0	0	0	0	0	0	0	0	0	0	0	0	0	1	0	1	1	0	0	0	0	1	1	0	2	0	0	0	0	0	0	0	2
Rv1402|AJW51212.1|UB21_07510|ARN08383.1|BJM02_07470|Probable primosomal protein N' (EC 3.6.4.-) (ATP-dependent helicase PriA)	0	0	0	1	0	0	0	0	2	3	0	2	0	0	0	0	1	0	1	1	0	1	0	3	0	1	1	3	0	0	0	0	1	0	0	0
Rv1403c|AJW48931.1|UB21_07515|ARN05985.1|BJM02_07475|Uncharacterized protein Rv1403c	0	0	0	0	0	0	0	0	0	0	0	0	0	0	0	0	0	0	0	0	0	0	0	0	0	0	0	2	0	0	0	0	0	0	0	0
Rv1404|AJW51213.1|UB21_07520|ARN08384.1|BJM02_07480|Probable transcriptional regulatory protein	0	1	0	0	0	0	0	0	0	0	0	0	0	3	1	0	0	0	0	0	0	2	2	0	2	2	0	0	0	0	0	2	2	2	0	0
Rv1405c|AJW48932.1|UB21_07525|ARN05986.1|BJM02_07485|Uncharacterized protein Rv1405c	0	1	0	2	0	2	0	0	2	0	1	0	2	1	1	2	1	0	0	0	4	1	6	0	0	2	0	4	0	0	2	2	0	0	2	2
Rv1406|AJW48933.1|UB21_07530|ARN05987.1|BJM02_07490|Methionyl-tRNA formyltransferase (EC 2.1.2.9)	0	1	0	0	0	0	0	0	0	0	0	0	0	0	0	0	0	0	0	0	0	0	0	0	0	0	0	0	0	0	0	0	0	0	0	2
Rv1407|AJW48934.1|UB21_07535|ARN05988.1|BJM02_07495|Putative methyltransferase Rv1407 (EC 2.1.1.-)	1	0	2	0	0	0	0	0	0	2	0	0	0	0	0	0	2	0	2	0	1	1	0	0	2	0	0	0	0	0	0	0	0	0	0	0
Rv1408|AJW48935.1|UB21_07540|ARN05989.1|BJM02_07500|Ribulose-phosphate 3-epimerase (EC 5.1.3.1)	0	1	0	0	0	0	0	0	0	0	0	0	0	0	0	0	0	0	0	0	2	0	0	0	0	0	0	0	0	0	0	0	0	2	0	2
Rv1409|AJW48936.1|UB21_07545|ARN05990.1|BJM02_07505|Riboflavin biosynthesis protein RibD [Includes: Diaminohydroxyphosphoribosylaminopyrimidine deaminase (DRAP deaminase) (EC 3.5.4.26) (Riboflavin-specific deaminase); 5-amino-6-(5-phosphoribosylamino)uracil reductase (EC 1.1.1.193) (HTP reductase)]	0	0	0	0	0	0	0	0	0	0	0	0	2	0	0	0	0	0	0	0	0	0	0	0	1	0	0	0	0	0	0	0	0	0	0	0
Rv1410c|AJW51214.1|UB21_07550|ARN08386.1|BJM02_07510|Probable triacylglyceride transporter Rv1410c (MFS-type drug efflux transporter P55)	0	0	0	0	0	0	0	0	0	2	0	2	4	0	4	0	0	0	0	2	0	0	1	0	1	0	0	0	0	0	2	0	0	0	0	0
Rv1411c|AJW51215.1|UB21_07555|ARN08385.1|BJM02_07515|Lipoarabinomannan carrier protein LprG (27 kDa lipoprotein) (Antigen P27) (Lipoprotein LprG) (Triacylated glycolipid carrier LprG) (Triacylglyceride transfer protein LprG)	0	0	0	0	0	0	0	0	0	2	2	0	5	0	0	2	0	1	0	0	0	0	0	2	0	0	0	2	0	2	1	0	0	0	0	0
Rv1412|AJW48937.1|UB21_07560|ARN05991.1|BJM02_07520|Riboflavin synthase (RS) (EC 2.5.1.9)	0	0	0	0	0	0	0	0	0	0	0	0	0	0	0	0	0	0	0	0	0	0	0	0	0	0	0	0	0	0	0	0	0	0	0	0
Rv1413|AJW48938.1|UB21_07565|ARN05992.1|BJM02_07525|Uncharacterized protein Rv1413	0	0	0	0	0	0	0	0	0	0	0	0	0	0	0	0	0	0	0	1	0	0	0	0	0	0	0	0	0	0	0	0	0	0	0	0
Rv1414|AJW48939.1|UB21_07570|ARN05993.1|BJM02_07530|Uncharacterized protein Rv1414	0	0	0	0	0	0	0	0	0	0	0	0	0	0	0	0	0	0	0	0	0	0	0	0	0	0	0	0	0	0	0	0	0	0	0	0
Rv1415|AJW48940.1|UB21_07575|ARN05994.1|BJM02_07535|Riboflavin biosynthesis protein RibBA [Includes: 3,4-dihydroxy-2-butanone 4-phosphate synthase (DHBP synthase) (EC 4.1.99.12); GTP cyclohydrolase-2 (EC 3.5.4.25) (GTP cyclohydrolase II)]	0	0	0	0	0	0	0	0	2	0	0	2	0	0	0	0	0	0	0	0	2	0	0	0	0	2	0	0	0	0	0	0	0	2	0	0
Rv1416|AJW48941.1|UB21_07580|ARN05995.1|BJM02_07540|6,7-dimethyl-8-ribityllumazine synthase (DMRL synthase) (LS) (Lumazine synthase) (EC 2.5.1.78)	0	0	0	2	0	0	0	0	0	0	0	0	0	0	0	0	0	0	0	0	0	0	0	0	0	0	0	0	0	0	0	0	0	0	0	0
Rv1417|AJW48942.1|UB21_07585|ARN05996.1|BJM02_07545|Uncharacterized protein Rv1417	0	0	0	0	0	0	0	0	0	0	0	0	0	0	0	0	0	0	0	0	0	0	0	0	0	0	0	0	0	0	0	0	0	0	0	0
Rv1418|AJW48943.1|UB21_07590|ARN05997.1|BJM02_07550|Putative lipoprotein LprH	2	0	0	0	0	2	0	0	0	0	0	0	0	0	0	0	0	0	0	0	0	0	0	0	0	0	0	0	0	0	0	0	0	0	0	0
Rv1419|AJW48944.1|UB21_07595|ARN05998.1|BJM02_07555|Uncharacterized protein Rv1419	0	0	0	0	0	0	0	0	0	0	0	2	0	1	0	0	0	0	2	0	4	0	0	0	0	0	2	0	2	0	0	0	0	0	1	0
Rv1420|AJW48945.1|UB21_07600|ARN05999.1|BJM02_07560|UvrABC system protein C (Protein UvrC) (Excinuclease ABC subunit C)	0	0	0	0	0	0	0	0	0	0	0	0	0	1	0	0	0	0	2	0	2	0	0	0	0	0	0	0	0	0	1	0	0	0	0	0
Rv1421|AJW48946.1|UB21_07605|ARN06000.1|BJM02_07565|Nucleotide-binding protein Rv1421	0	0	0	0	0	0	0	0	2	0	0	0	0	1	0	0	0	0	0	0	0	0	0	0	0	0	0	0	0	0	0	0	0	0	1	0
Rv1422|AJW48947.1|UB21_07610|ARN06001.1|BJM02_07570|Putative gluconeogenesis factor	0	0	0	0	0	0	0	0	0	0	0	0	0	2	0	0	0	0	0	0	0	0	0	0	0	0	0	0	0	0	0	0	0	0	0	0
Rv1423|AJW48948.1|UB21_07615|ARN06002.1|BJM02_07575|Probable cell division protein WhiA	0	0	0	0	0	0	0	0	0	0	0	0	0	0	0	0	0	0	2	0	0	0	0	0	0	0	0	0	0	0	0	0	0	0	0	0
Rv1424c|AJW48949.1|UB21_07620|ARN06003.1|BJM02_07580|Uncharacterized protein Rv1424c	0	0	0	0	0	0	0	0	0	0	0	0	0	0	0	0	0	0	0	0	0	0	0	0	0	0	0	0	0	0	0	0	0	0	0	0
Rv1425|AJW48950.1|UB21_07625|ARN06004.1|BJM02_07585|Putative diacyglycerol O-acyltransferase Rv1425 (EC 2.3.1.20) (Putative triacylglycerol synthase Rv1425)	0	0	0	0	0	0	0	0	0	0	0	0	0	0	0	0	0	0	0	0	0	0	0	0	0	0	2	0	0	0	0	0	0	0	0	0
Rv1426c|AJW48951.1|UB21_07630|ARN06005.1|BJM02_07590|Probable esterase LipO	0	0	0	1	0	0	0	0	0	0	0	0	0	0	0	0	0	0	0	0	0	0	0	0	0	0	0	0	0	0	0	0	0	0	0	0
Rv1427c|AJW48952.1|UB21_07635|ARN06006.1|BJM02_07595|Possible long-chain-fatty-acid--CoA ligase FadD12 (Fatty-acid-CoA synthetase) (Fatty-acid-CoA synthase)	0	0	0	0	0	0	0	0	0	0	0	0	0	0	0	0	0	0	0	0	1	0	2	0	2	0	0	0	0	0	0	1	0	0	0	0
Rv1428c|AJW48953.1|UB21_07640|ARN06007.1|BJM02_07600|PlsC domain-containing protein	0	2	0	0	0	0	0	0	0	0	0	0	0	0	0	0	0	0	0	0	0	0	0	0	0	0	0	0	0	0	0	0	0	0	0	0
Rv1429|AJW48954.1|UB21_07645|ARN06008.1|BJM02_07605|Conserved protein	0	0	0	0	0	0	0	0	0	0	0	0	0	0	2	0	0	0	0	0	0	0	0	0	0	0	2	0	0	0	0	0	0	0	0	0
Rv1430|AJW48955.1|UB21_07650|ARN06009.1|BJM02_07610|Esterase PE16 (EC 3.1.1.-) (PE family protein PE16)	0	0	1	0	0	0	0	0	0	0	0	0	0	0	0	2	0	0	0	0	0	0	0	0	0	0	0	0	0	0	0	0	0	0	0	0
Rv1432|AJW48956.1|UB21_07660|ARN06011.1|BJM02_07620|Probable dehydrogenase	0	0	0	0	0	0	0	0	0	0	0	0	0	0	0	0	0	0	0	0	0	0	0	0	0	0	0	0	0	0	0	0	0	0	0	0
Rv1433|AJW48957.1|UB21_07665|ARN06012.1|BJM02_07625|Probable L,D-transpeptidase 3 (LDT 3) (EC 2.3.2.-) (Ldt(Mt3))	0	0	0	0	0	0	0	0	0	0	0	0	0	0	0	0	0	0	0	0	0	0	0	0	0	0	0	0	0	0	0	0	0	0	0	0
Rv1434|AJW48958.1|UB21_07670|ARN06013.1|BJM02_07630|Uncharacterized protein	0	0	0	0	0	0	0	0	0	0	0	0	0	0	0	0	0	0	0	0	0	0	0	0	0	0	0	0	0	0	0	0	0	0	0	0
Rv1435c|AJW51216.1|UB21_07675|ARN08387.1|BJM02_07635|Probable conserved proline, glycine, valine-rich secreted protein	0	0	0	0	0	0	0	0	0	0	0	0	0	0	0	0	0	0	0	0	2	0	0	2	0	0	0	0	0	0	0	0	0	0	0	0
Rv1436|AJW48959.1|UB21_07680|ARN06014.1|BJM02_07640|Glyceraldehyde-3-phosphate dehydrogenase (GAPDH) (EC 1.2.1.12) (NAD-dependent glyceraldehyde-3-phosphate dehydrogenase)	0	0	0	0	0	0	0	0	0	0	0	0	0	0	2	0	2	0	0	0	0	0	0	2	0	0	0	0	0	0	2	0	0	0	0	0
Rv1438|AJW48961.1|UB21_07690|ARN06016.1|BJM02_07650|Triosephosphate isomerase (TIM) (TPI) (EC 5.3.1.1) (Triose-phosphate isomerase)	0	0	0	0	0	0	0	0	0	0	0	0	0	0	0	0	0	0	0	0	0	0	0	2	0	0	0	0	0	0	0	2	0	0	0	0
Rv1439c|AJW48963.1|UB21_07700|ARN06018.1|BJM02_07660|SnoaL-like domain-containing protein	0	0	0	0	0	0	0	0	0	0	0	0	0	0	0	0	0	0	0	0	0	0	0	0	0	0	0	0	0	0	0	0	0	0	0	0
Rv1440|AJW48964.1|UB21_07705|ARN06019.1|BJM02_07665|Probable protein-export membrane protein SecG	0	0	0	0	0	0	0	0	0	0	0	0	0	0	0	0	0	0	0	0	0	0	0	0	0	0	0	0	0	0	0	0	0	0	1	0
Rv1442|AJW48966.1|UB21_07715|ARN06021.1|BJM02_07675|Probable biotin sulfoxide reductase BisC (BDS reductase) (BSO reductase)	0	0	0	0	0	0	0	0	0	0	2	2	0	0	0	0	0	0	0	0	2	0	0	0	0	0	0	0	2	0	0	0	0	0	0	0
Rv1443c|AJW51217.1|UB21_07720|ARN08388.1|BJM02_07680|Uncharacterized protein	0	0	0	0	0	0	0	0	0	0	0	0	0	0	0	0	0	0	0	0	0	0	0	0	0	0	0	0	2	0	0	0	0	0	0	0
Rv1444c|AJW48968.1|UB21_07730|ARN06023.1|BJM02_07690|Uncharacterized protein	0	0	0	0	0	0	0	0	0	0	0	0	0	0	0	0	0	0	0	0	0	0	0	0	0	0	0	0	0	0	1	0	0	0	0	0
Rv1445c|AJW48969.1|UB21_07735|ARN06024.1|BJM02_07695|6-phosphogluconolactonase (6PGL) (EC 3.1.1.31)	0	0	0	0	0	0	0	0	0	0	0	0	0	0	0	0	0	0	0	0	0	0	0	0	0	0	0	0	0	0	0	0	0	0	0	0
Rv1446c|AJW48970.1|UB21_07740|ARN06025.1|BJM02_07700|Putative OXPP cycle protein OpcA	1	0	0	0	0	0	0	0	0	0	0	0	0	0	0	0	0	0	0	0	0	0	0	1	0	0	0	0	0	0	0	0	0	0	0	0
Rv1447c|AJW48971.1|UB21_07745|ARN06026.1|BJM02_07705|Glucose-6-phosphate 1-dehydrogenase 2 (G6PD 2) (EC 1.1.1.49)	0	0	0	0	0	0	0	0	0	0	0	0	0	0	0	0	0	0	0	0	0	0	0	0	0	0	2	0	0	2	0	0	0	0	0	0
Rv1448c|AJW48972.1|UB21_07750|ARN06027.1|BJM02_07710|Transaldolase (EC 2.2.1.2)	0	0	0	0	0	0	0	0	0	0	0	0	0	0	0	0	0	0	0	0	0	0	0	0	0	2	0	0	0	2	0	0	0	0	0	0
Rv1451|AJW48973.1|UB21_07765|ARN06030.1|BJM02_07730|Protoheme IX farnesyltransferase (EC 2.5.1.141) (Heme B farnesyltransferase) (Heme O synthase)	0	0	2	0	0	0	0	0	0	0	0	0	0	0	0	0	0	0	0	0	0	0	0	0	0	0	0	0	0	0	0	0	0	0	0	0
Rv1453|AJW48974.1|UB21_07775|ARN06031.1|BJM02_07740|Possible transcriptional activator protein	0	1	0	0	1	0	0	0	0	0	0	0	0	0	0	0	0	0	0	1	0	0	3	0	1	1	0	0	0	0	0	0	0	0	0	0
Rv1454c|AJW48975.1|UB21_07780|ARN08389.1|BJM02_07745|Probable quinone reductase Qor (NADPH:quinone reductase) (Zeta-crystallin homolog protein)	0	0	0	0	0	0	0	0	0	0	0	0	0	0	0	0	0	0	0	0	0	0	0	0	0	0	0	0	0	0	0	0	0	0	0	0
Rv1455|AJW48976.1|UB21_07785|ARN06032.1|BJM02_07750|Conserved protein	0	0	0	2	0	0	0	0	0	0	0	0	0	0	0	0	0	0	0	0	0	0	0	0	0	0	0	0	0	0	0	0	0	0	0	0
Rv1456c|AJW48977.1|UB21_07790|ARN06033.1|BJM02_07755|Probable unidentified antibiotic-transport integral membrane ABC transporter	0	0	0	0	0	0	0	0	0	0	0	0	0	0	0	0	0	0	0	0	0	0	0	0	0	0	0	0	0	0	0	0	0	0	2	0
Rv1457c|AJW48978.1|UB21_07795|ARN06034.1|BJM02_07760|Probable unidentified antibiotic-transport integral membrane ABC transporter	0	0	0	0	0	0	0	0	0	0	0	0	0	0	0	0	0	0	0	0	0	0	0	0	0	0	0	0	0	0	0	0	0	0	0	0
Rv1458c|AJW48979.1|UB21_07800|ARN06035.1|BJM02_07765|Probable unidentified antibiotic-transport ATP-binding protein ABC transporter	0	0	1	0	0	0	0	0	0	0	0	0	0	0	0	0	0	0	0	0	0	0	0	0	0	0	0	0	0	0	0	0	0	0	0	0
Rv1459c|AJW48980.1|UB21_07805|ARN06036.1|BJM02_07770|Alpha-(1->6)-mannopyranosyltransferase Rv1459c (EC 2.4.1.-)	0	0	0	0	0	0	0	0	0	0	0	0	0	0	0	0	0	0	0	0	0	0	0	0	0	0	0	0	0	2	0	0	2	0	1	0
Rv1460|AJW51218.1|UB21_07810|ARN08390.1|BJM02_07775|Probable transcriptional regulatory protein	0	0	0	0	0	0	0	0	0	0	0	0	0	0	2	0	0	1	0	0	2	2	0	0	0	2	0	0	0	0	0	0	0	0	0	0
Rv1461|AJW48981.1|UB21_07815|ARN06037.1|BJM02_07780|UPF0051 protein Rv1461 [Cleaved into: Endonuclease PI-MtuHIIP (EC 3.1.-.-) (Mtu pps1 intein)]	0	0	0	0	0	0	0	2	2	0	0	2	2	4	2	8	2	4	2	2	0	2	0	4	8	0	2	10	8	4	8	10	6	2	4	4
Rv1462|AJW48982.1|UB21_07820|ARN06038.1|BJM02_07785|UPF0051 protein Rv1462	0	0	2	0	0	0	0	0	0	0	0	0	2	0	4	2	0	0	0	0	0	2	0	0	0	4	4	4	0	2	0	0	0	2	0	1
Rv1464|AJW48984.1|UB21_07830|ARN06040.1|BJM02_07795|Probable cysteine desulfurase (EC 2.8.1.7)	0	0	0	2	0	2	0	0	0	0	0	0	0	2	0	2	0	0	0	2	0	0	0	0	2	4	3	1	0	0	0	4	0	0	0	0
Rv1465|AJW48985.1|UB21_07835|ARN06041.1|BJM02_07800|Possible nitrogen fixation related protein	0	0	0	0	0	0	0	0	0	0	0	0	0	0	0	0	0	0	1	2	0	0	1	0	0	0	0	1	0	0	0	0	0	0	0	2
Rv1466|AJW48986.1|UB21_07840|ARN06042.1|BJM02_07805|Conserved protein	0	0	0	0	0	0	0	0	0	0	2	0	0	0	0	2	0	0	0	0	0	0	0	0	0	0	2	1	0	0	0	2	0	0	2	0
Rv1467c|AJW48987.1|UB21_07845|ARN06043.1|BJM02_07810|Probable acyl-CoA dehydrogenase FadE15	0	0	0	0	0	0	0	0	0	0	0	0	0	0	0	0	0	0	0	0	0	2	2	0	0	0	0	0	0	0	0	0	0	0	2	0
Rv1469|AJW48990.1|UB21_07865|ARN06046.1|BJM02_07830|Probable cobalt/nickel-exporting P-type ATPase (EC 7.2.2.-) (Cation-transporting P-type ATPase CtpD)	0	0	0	0	0	0	0	0	0	0	0	0	0	0	0	0	0	0	0	0	0	0	0	0	0	0	0	0	0	0	0	0	0	0	1	1
Rv1470|AJW48991.1|UB21_07870|ARN06047.1|BJM02_07835|Probable thioredoxin TrxA	0	0	0	0	0	0	0	0	0	0	0	0	0	0	0	0	0	0	0	0	0	0	0	0	0	0	0	0	0	0	0	0	0	0	0	0
Rv1471|AJW48992.1|UB21_07875|ARN06048.1|BJM02_07840|Thioredoxin	0	1	0	0	0	0	0	0	0	0	0	0	0	0	0	0	0	0	0	0	0	0	0	0	0	0	0	0	0	0	0	0	0	2	0	0
Rv1472|AJW48993.1|UB21_07880|ARN06049.1|BJM02_07845|Probable enoyl-CoA hydratase echA12 (EC 4.2.1.17)	0	0	0	0	0	0	0	0	0	0	0	0	0	0	0	0	0	0	0	0	0	0	4	0	0	0	0	0	0	0	0	0	0	0	2	0
Rv1473|AJW48994.1|UB21_07885|ARN06050.1|BJM02_07850|Probable macrolide-transport ATP-binding protein ABC transporter	0	0	0	1	0	0	0	0	0	0	0	0	0	0	0	0	0	0	0	0	0	0	0	0	0	0	0	0	0	0	0	0	0	0	0	0
Rv1473A|AJW48995.1|UB21_07890|ARN06051.1|BJM02_07855|Possible transcriptional regulatory protein	0	0	0	0	0	0	0	0	0	0	0	0	0	0	0	0	0	0	0	0	0	0	0	0	0	0	0	0	0	0	0	0	0	0	0	0
Rv1474c|AJW48996.1|UB21_07895|ARN06052.1|BJM02_07860|HTH-type transcriptional repressor Rv1474c	0	0	0	0	0	0	0	0	0	0	0	0	0	0	0	0	0	0	0	0	0	0	0	0	0	0	0	0	0	0	0	0	0	0	0	0
Rv1476|AJW48998.1|UB21_07905|ARN06054.1|BJM02_07870|Possible membrane protein	0	0	0	0	0	0	0	0	0	0	0	0	0	0	0	0	0	0	0	0	0	0	0	0	0	0	0	0	0	0	0	0	0	0	0	0
Rv1477|AJW48999.1|UB21_07910|ARN06055.1|BJM02_07875|Peptidoglycan endopeptidase RipA (EC 3.4.-.-) (Macrophage invasion and intracellular persistence protein A) (Resuscitation-promoting factor interaction partner A) (Rpf-interacting protein A)	0	0	0	0	0	0	0	0	0	0	0	0	0	0	0	0	0	0	0	0	0	0	0	0	0	0	0	0	0	0	0	0	0	0	0	0
Rv1478|AJW49000.1|UB21_07915|ARN06056.1|BJM02_07880|Peptidoglycan endopeptidase RipB (EC 3.4.-.-) (Macrophage invasion and intracellular persistence protein B) (Resuscitation-promoting factor interaction partner B) (Rpf-interacting protein B)	0	0	0	0	0	0	0	0	0	0	0	0	0	0	0	0	0	0	0	0	0	0	0	0	0	0	0	0	0	0	0	0	0	0	0	0
Rv1479|AJW49001.1|UB21_07920|ARN06057.1|BJM02_07885|Probable transcriptional regulatory protein MoxR1	1	2	1	1	0	0	0	1	0	2	0	0	0	2	0	0	0	2	0	0	2	4	0	0	2	0	0	0	1	2	0	0	0	0	0	2
Rv1480|AJW49002.1|UB21_07925|ARN06058.1|BJM02_07890|Uncharacterized protein Rv1480	0	0	1	0	0	0	0	0	0	0	0	0	0	0	0	0	0	2	0	0	0	0	0	2	0	2	0	0	2	0	0	0	0	0	0	0
Rv1481|AJW49003.1|UB21_07930|ARN06059.1|BJM02_07895|UPF0353 protein Rv1481	0	0	0	0	0	0	0	0	0	0	0	0	2	0	0	0	0	0	0	0	0	0	0	0	0	0	0	0	0	0	0	0	0	2	0	0
Rv1483|AJW49004.1|UB21_07940|ARN06060.1|BJM02_07905|3-oxoacyl-[acyl-carrier-protein] reductase FabG1 (EC 1.1.1.100) (3-ketoacyl-acyl carrier protein reductase) (Beta-ketoacyl-ACP reductase) (Beta-ketoacyl-acyl carrier protein reductase)	0	0	0	0	0	0	0	0	0	0	1	0	0	0	0	0	0	0	0	0	0	2	0	0	0	0	0	0	0	0	0	0	0	0	0	2
Rv1484|AJW49005.1|UB21_07945|ARN06061.1|BJM02_07910|Enoyl-[acyl-carrier-protein] reductase [NADH] (ENR) (Enoyl-ACP reductase) (EC 1.3.1.9) (FAS-II enoyl-ACP reductase) (NADH-dependent 2-trans-enoyl-ACP reductase)	0	0	0	0	0	0	0	0	0	0	0	0	0	0	0	0	0	0	0	0	0	0	0	0	0	0	0	0	0	0	0	0	0	0	0	0
Rv1485|AJW49006.1|UB21_07950|ARN06062.1|BJM02_07915|Coproporphyrin III ferrochelatase (EC 4.99.1.9)	0	0	0	0	1	0	0	0	0	0	0	0	2	0	0	0	1	0	1	0	0	0	0	0	1	2	3	0	0	0	0	0	0	0	0	0
Rv1486c|AJW51219.1|UB21_07955|ARN08392.1|BJM02_07920|Uncharacterized protein Rv1486c	0	0	0	0	0	0	0	0	0	0	0	0	0	0	0	0	0	0	0	0	0	0	0	0	0	0	0	0	0	0	0	0	1	0	0	0
Rv1487|AJW49007.1|UB21_07960|ARN06063.1|BJM02_07925|Conserved membrane protein	0	0	0	0	0	0	0	0	0	0	0	0	0	0	0	0	0	0	0	0	0	0	0	0	0	0	0	0	0	0	0	0	0	0	0	0
Rv1488|AJW49008.1|UB21_07965|ARN06064.1|BJM02_07930|Uncharacterized protein Rv1488	0	0	0	0	0	0	0	0	0	0	0	0	0	0	0	0	0	0	0	1	0	0	0	2	0	0	0	0	0	0	0	0	0	0	0	0
Rv1489|AJW49009.1|UB21_07970|ARN06065.1|BJM02_07935|Conserved protein	0	0	0	0	0	0	0	0	0	2	0	0	0	0	0	0	0	0	0	1	0	0	0	0	0	0	0	0	0	0	0	0	0	0	0	0
Rv1489A|AJW49010.1|UB21_07975|ARN06066.1|BJM02_07940|Conserved protein	0	0	0	0	0	0	0	0	0	0	0	0	0	0	0	0	0	0	0	0	0	0	0	0	0	0	0	0	0	0	0	0	0	0	0	0
Rv1490|AJW49011.1|UB21_07980|ARN06067.1|BJM02_07945|Uncharacterized protein Rv1490	0	0	0	0	0	0	0	0	0	0	0	0	0	0	0	0	0	0	0	0	0	0	0	0	0	0	0	0	0	0	0	0	0	0	0	0
Rv1491c|AJW49012.1|UB21_07985|ARN06068.1|BJM02_07950|TVP38/TMEM64 family membrane protein Rv1491c	0	0	0	0	0	0	0	0	0	0	0	0	0	2	0	2	0	0	2	0	0	0	0	0	0	0	0	0	0	0	0	0	0	2	0	0
Rv1492|AJW51220.1|UB21_07990|ARN08393.1|BJM02_07955|Probable methylmalonyl-CoA mutase small subunit (MCM) (EC 5.4.99.2)	0	1	0	0	0	0	0	0	0	0	0	0	0	0	2	0	0	0	0	0	0	0	0	0	0	0	0	0	0	0	0	0	0	0	0	0
Rv1493|AJW49013.1|UB21_07995|ARN06069.1|BJM02_07960|Probable methylmalonyl-CoA mutase large subunit (MCM) (EC 5.4.99.2)	0	0	0	0	1	1	1	1	0	1	1	1	0	0	0	0	0	1	2	1	0	0	0	0	4	0	4	0	0	1	0	1	0	0	0	0
Rv1494|AJW49014.1|UB21_08000|ARN06070.1|BJM02_07965|Probable antitoxin MazE4	0	0	0	0	0	0	0	0	0	0	0	0	0	0	0	0	0	0	0	0	0	0	0	0	0	0	0	0	0	0	0	0	0	0	0	0
Rv1495|AJW49015.1|UB21_08005|ARN06071.1|BJM02_07970|Endoribonuclease MazF4 (EC 3.1.-.-) (Toxin MazF4) (mRNA interferase MazF-mt7)	0	0	0	0	0	0	0	0	0	0	0	0	0	0	0	0	0	0	0	0	0	0	0	0	0	0	0	0	0	0	0	0	0	0	0	0
Rv1496|AJW51221.1|UB21_08010|ARN08394.1|BJM02_07975|Probable GTPase Rv1496 (EC 3.6.-.-)	1	0	0	0	0	0	0	0	0	0	0	0	0	0	0	2	0	0	0	0	0	0	0	2	0	0	0	0	0	0	0	0	0	0	0	2
Rv1497|AJW49016.1|UB21_08015|ARN06072.1|BJM02_07980|Esterase/beta-lactamase LipL (EC 3.1.1.-) (EC 3.5.2.6)	0	0	0	0	0	0	0	0	0	0	0	0	0	0	0	0	0	0	0	0	0	0	0	0	0	0	0	0	2	0	0	0	0	0	0	0
Rv1498A|AJW49018.1|UB21_08025|ARN06074.1|BJM02_07990|Conserved protein	0	0	0	0	0	0	0	0	0	0	0	0	0	0	0	0	0	0	0	0	0	0	0	0	0	0	0	0	0	0	0	0	0	0	0	0
Rv1498c|AJW49017.1|UB21_08020|ARN06073.1|BJM02_07985|Uncharacterized protein Rv1498c	0	0	2	0	0	0	0	0	0	0	0	0	0	0	0	0	0	0	0	0	2	0	0	0	0	0	0	1	0	0	0	0	0	0	0	0
Rv1499|AJW49019.1|UB21_08030|ARN06075.1|BJM02_07995|Uncharacterized protein	0	0	0	0	0	0	0	0	0	0	0	0	0	0	0	0	0	0	0	0	0	0	0	0	0	0	0	0	0	2	0	0	0	0	0	0
Rv1500|AJW49020.1|UB21_08035|ARN06076.1|BJM02_08000|Putative glycosyltransferases (EC 2.4.-.-)	0	0	0	0	1	2	0	0	0	0	0	0	1	0	2	0	0	4	3	3	4	2	3	2	4	0	2	0	2	1	5	0	3	0	2	0
Rv1501|AJW49021.1|UB21_08040|ARN06077.1|BJM02_08005|Uncharacterized protein Rv1501	0	0	2	0	0	0	0	0	0	0	0	0	0	0	0	0	0	0	0	0	0	0	0	0	0	0	0	0	0	0	0	0	0	0	0	0
Rv1502|AJW49022.1|UB21_08045|ARN06078.1|BJM02_08010|Uncharacterized protein Rv1502	0	0	0	0	0	0	0	0	0	0	0	0	0	0	0	0	0	0	0	0	0	0	0	0	0	0	0	0	0	0	2	0	0	0	0	0
Rv1503c|AJW49023.1|UB21_08050|ARN06079.1|BJM02_08015|Uncharacterized protein (Fragment)	0	0	0	0	0	0	0	0	0	0	0	0	0	0	0	0	0	0	0	0	0	0	0	0	0	0	0	0	0	0	0	0	0	0	0	0
Rv1504c|AJW49024.1|UB21_08055|ARN06080.1|BJM02_08020|Uncharacterized protein	0	0	0	0	0	0	0	0	0	0	0	0	0	0	0	0	1	0	0	0	0	0	0	0	0	0	0	0	0	0	0	0	0	0	0	0
Rv1505c|AJW49025.1|UB21_08060|ARN06081.1|BJM02_08025|Uncharacterized protein	0	0	0	0	0	0	0	0	0	0	0	0	0	0	0	0	0	0	0	0	0	0	0	0	0	0	0	0	0	0	0	0	0	0	0	0
Rv1506c|AJW49026.1|UB21_08065|ARN06082.1|BJM02_08030|Putative methyltransferase Rv1506c (EC 2.1.1.-)	0	0	0	0	0	0	0	0	0	0	0	0	0	0	0	0	0	0	0	0	0	0	0	0	0	0	0	0	0	0	0	0	0	0	0	0
Rv1507A|AJW49028.1|UB21_08075|ARN06083.1|BJM02_08040|Uncharacterized protein	0	0	0	0	0	0	0	0	0	0	0	0	0	0	0	0	0	0	0	0	0	0	0	0	0	0	0	0	0	0	0	0	0	0	0	0
Rv1507c|AJW49027.1|UB21_08070|ARN08395.1|BJM02_08035|Uncharacterized protein Rv1507c	0	0	0	0	1	0	0	0	0	0	0	0	0	0	0	0	0	0	0	0	0	0	2	0	0	0	0	0	0	0	0	0	0	0	0	0
Rv1508A|AJW49030.1|UB21_08085|ARN08396.1|BJM02_08050|NAD(P)-bd_dom domain-containing protein	0	0	0	0	0	0	0	0	0	0	0	0	0	0	0	0	0	0	0	0	0	0	0	0	0	0	0	0	0	0	0	0	0	0	0	0
Rv1508c|AJW49029.1|UB21_08080|ARN06084.1|BJM02_08045|Probable membrane protein	2	0	0	0	0	0	0	0	0	2	0	0	0	0	0	0	0	0	0	0	0	0	0	0	0	0	0	1	0	2	2	0	0	0	0	0
Rv1509|AJW49031.1|UB21_08090|ARN06085.1|BJM02_08055|Uncharacterized protein Rv1509	0	0	0	0	0	0	0	0	0	0	2	0	0	0	0	0	0	0	0	0	0	0	0	0	0	0	0	0	0	0	0	0	0	0	0	0
Rv1510|AJW49032.1|UB21_08095|ARN06086.1|BJM02_08060|Uncharacterized protein Rv1510	0	0	0	0	0	0	0	0	0	0	0	0	0	0	0	0	0	0	0	0	2	0	0	0	0	0	1	0	0	0	0	0	0	0	0	0
Rv1511|AJW49033.1|UB21_08100|ARN06087.1|BJM02_08065|GDP-mannose 4,6-dehydratase (EC 4.2.1.47) (GDP-D-mannose dehydratase)	0	0	0	0	0	0	0	0	0	0	0	0	0	0	0	0	0	0	0	0	0	0	0	0	0	0	0	0	0	0	0	0	0	0	0	0
Rv1512|AJW49034.1|UB21_08105|ARN06088.1|BJM02_08070|GDP-L-fucose synthase (EC 1.1.1.271) (GDP-4-keto-6-deoxy-D-mannose-3,5-epimerase-4-reductase)	0	0	0	0	0	0	0	0	0	0	0	0	0	0	0	0	0	0	0	0	2	0	0	0	0	0	0	0	0	0	0	0	0	0	0	0
Rv1513|AJW49035.1|UB21_08110|ARN06089.1|BJM02_08075|Conserved protein	0	0	0	0	0	0	0	0	0	0	0	0	0	0	0	0	0	0	0	0	0	0	0	0	0	0	0	0	0	0	0	0	0	0	0	0
Rv1514c|AJW49036.1|UB21_08115|ARN06090.1|BJM02_08080|Uncharacterized glycosyltransferase Rv1514c (EC 2.4.-.-)	0	0	0	0	0	0	0	0	0	0	0	0	0	0	0	0	0	0	0	0	0	0	0	0	0	1	0	0	0	0	0	0	0	0	0	0
Rv1515c|AJW51222.1|UB21_08120|ARN06091.1|BJM02_08085|Methyltranfer_dom domain-containing protein	0	0	0	0	0	0	0	0	0	0	0	0	0	0	0	0	0	0	0	0	0	0	0	0	0	1	0	0	0	0	0	0	0	0	0	0
Rv1516c|AJW49037.1|UB21_08125|ARN06092.1|BJM02_08090|Probable sugar transferase	1	0	0	0	0	0	0	0	0	0	0	0	1	0	0	0	0	0	0	0	0	0	0	0	0	0	0	0	0	0	0	0	0	0	0	0
Rv1517|AJW49038.1|UB21_08130|ARN06093.1|BJM02_08095|Conserved hypothetical transmembrane protein	0	0	0	0	0	0	0	0	0	0	0	0	0	0	0	0	0	0	0	0	0	0	0	0	0	0	0	0	0	0	0	0	0	0	0	0
Rv1518|AJW49039.1|UB21_08135|ARN06094.1|BJM02_08100|Uncharacterized protein Rv1518	0	0	0	0	0	0	0	0	0	0	0	0	0	0	0	0	0	0	0	0	0	0	0	0	0	1	0	0	0	0	0	0	0	0	0	0
Rv1519|AJW49040.1|UB21_08140|ARN06095.1|BJM02_08105|Uncharacterized protein Rv1519	0	0	0	0	0	0	0	0	0	0	0	0	0	0	0	0	0	0	0	0	0	0	0	0	0	0	0	0	0	0	0	0	0	0	2	0
Rv1520|AJW51223.1|UB21_08145|ARN08397.1|BJM02_08110|Uncharacterized protein Rv1520	0	0	0	0	0	0	0	0	1	0	0	0	0	0	0	0	0	0	0	0	0	0	0	0	0	0	0	0	0	0	0	1	0	0	0	0
Rv1521|AJW51224.1|UB21_08150|ARN08398.1|BJM02_08115|Putative fatty-acid--CoA ligase fadD25 (EC 6.2.1.-) (Acyl-CoA synthetase)	0	0	0	0	0	0	0	0	0	0	0	0	0	0	2	0	0	0	0	0	0	0	2	0	2	0	0	0	2	0	0	0	0	0	0	0
Rv1522c|AJW51225.1|UB21_08155|ARN08399.1|BJM02_08120|Probable transport protein MmpL12	0	0	0	0	0	0	0	0	0	0	0	0	0	0	0	0	0	0	0	0	0	0	0	0	0	0	0	2	0	0	0	0	0	0	0	2
Rv1523|AJW49041.1|UB21_08160|ARN06096.1|BJM02_08125|Probable methyltransferase	0	0	0	0	0	0	0	0	0	0	0	0	0	0	0	0	0	0	0	0	0	0	1	0	0	0	0	0	0	0	0	0	0	0	0	0
Rv1524|AJW49042.1|UB21_08165|ARN06097.1|BJM02_08130|Uncharacterized glycosyltransferase Rv1524 (EC 2.4.-.-)	0	0	0	0	0	0	0	0	0	0	0	0	0	0	0	0	0	0	0	0	0	0	1	0	0	0	0	0	0	0	0	0	0	0	0	0
Rv1525|AJW49043.1|UB21_08170|ARN06098.1|BJM02_08135|Uncharacterized protein Rv1525	0	0	0	0	0	0	0	0	0	0	0	0	0	0	0	0	0	0	0	0	0	0	0	0	0	0	0	0	0	0	0	0	0	0	0	0
Rv1526c|AJW49044.1|UB21_08175|ARN06099.1|BJM02_08140|Uncharacterized protein Rv1526c	0	0	0	0	0	0	0	0	0	0	0	0	0	0	0	0	0	0	0	0	0	0	0	2	0	0	2	0	2	0	0	0	0	0	0	0
Rv1528c|AJW49045.1|UB21_08185|ARN06101.1|BJM02_08150|Probable conserved polyketide synthase associated protein PapA4	0	0	0	0	0	0	0	0	0	0	0	0	0	0	0	0	0	0	0	0	0	0	0	0	0	0	0	0	0	0	0	0	0	0	0	0
Rv1529|AJW49046.1|UB21_08190|ARN06102.1|BJM02_08155|Probable fatty-acid-AMP ligase FadD24 (Fatty-acid-AMP synthetase) (Fatty-acid-AMP synthase)	0	0	0	2	0	0	0	0	0	0	0	0	0	0	0	0	0	0	0	0	0	0	0	0	0	0	0	0	0	0	0	2	0	2	0	0
Rv1530|AJW49047.1|UB21_08195|ARN06103.1|BJM02_08160|Probable alcohol dehydrogenase adh (EC 1.1.1.1)	0	0	1	0	0	0	0	1	0	0	0	0	0	0	0	0	0	0	0	0	0	0	2	0	0	0	0	0	0	0	0	1	0	0	0	0
Rv1531|AJW49048.1|UB21_08200|ARN06104.1|BJM02_08165|Conserved protein	0	0	0	0	0	0	1	0	0	0	0	0	0	0	0	0	0	0	0	0	0	0	0	0	0	0	0	0	0	0	0	1	0	0	0	0
Rv1532c|AJW49049.1|UB21_08205|ARN06105.1|BJM02_08170|4HBT domain-containing protein	0	0	0	0	0	0	1	0	0	0	0	0	0	0	0	0	0	0	0	0	0	2	0	0	0	0	0	0	1	0	0	1	0	2	0	0
Rv1533|AJW49050.1|UB21_08210|ARN06106.1|BJM02_08175|Putative monooxygenase Rv1533 (EC 1.13.12.-)	0	1	0	0	0	0	0	0	0	0	0	0	0	0	0	0	0	0	0	0	0	0	0	0	0	0	0	2	0	0	0	0	0	0	0	0
Rv1534|AJW49051.1|UB21_08215|ARN06107.1|BJM02_08180|Probable transcriptional regulator	0	2	0	2	0	0	0	0	0	0	0	0	1	0	0	0	0	0	0	0	0	0	0	0	0	0	0	0	0	0	0	0	0	0	0	0
Rv1535|AJW49052.1|UB21_08220|ARN06108.1|BJM02_08185|Uncharacterized protein	0	0	0	0	0	0	0	0	0	0	0	0	0	0	0	0	0	1	0	0	0	0	0	0	0	2	1	0	3	0	0	1	0	0	0	0
Rv1536|AJW49053.1|UB21_08225|ARN06109.1|BJM02_08190|Isoleucine--tRNA ligase (EC 6.1.1.5) (Isoleucyl-tRNA synthetase) (IleRS)	1	0	0	0	0	0	0	0	0	0	0	0	0	0	0	0	0	0	0	0	0	0	0	0	0	0	0	0	0	0	0	0	0	0	0	0
Rv1537|AJW49054.1|UB21_08230|ARN06110.1|BJM02_08195|DNA polymerase IV 1 (Pol IV 1) (EC 2.7.7.7)	0	0	0	0	0	0	0	0	0	0	0	0	0	0	0	2	0	0	0	0	0	0	1	0	0	0	0	0	0	0	0	0	0	0	0	0
Rv1538c|AJW49055.1|UB21_08235|ARN06111.1|BJM02_08200|Probable L-asparaginase (L-ASNase) (EC 3.5.1.1) (L-asparagine amidohydrolase)	0	0	0	0	0	0	0	0	0	0	0	0	0	0	0	0	0	0	0	1	0	0	0	0	0	2	0	0	0	0	0	0	0	0	0	0
Rv1539|AJW49056.1|UB21_08240|ARN06112.1|BJM02_08205|Lipoprotein signal peptidase (EC 3.4.23.36) (Prolipoprotein signal peptidase) (Signal peptidase II) (SPase II)	0	0	0	0	0	0	1	0	0	0	0	0	0	0	0	0	0	0	0	0	0	0	0	0	0	0	0	0	0	0	0	0	0	0	0	0
Rv1540|AJW49057.1|UB21_08245|ARN06113.1|BJM02_08210|Uncharacterized RNA pseudouridine synthase Rv1540 (EC 5.4.99.-) (RNA pseudouridylate synthase) (RNA-uridine isomerase)	0	0	0	0	0	0	0	0	0	0	0	0	0	0	0	0	0	0	0	0	0	0	0	0	0	0	0	2	0	0	0	0	0	0	0	0
Rv1541c|AJW49058.1|UB21_08250|ARN06114.1|BJM02_08215|Lipoprotein LprI (Glycolipoprotein LprI) (Lysozyme inhibitor LprI)	0	0	0	0	0	0	0	0	0	0	0	0	2	0	0	0	0	0	0	0	0	0	0	0	0	0	0	0	0	0	0	0	0	0	0	0
Rv1542c|AJW49059.1|UB21_08255|ARN06115.1|BJM02_08220|Group 1 truncated hemoglobin GlbN (Truncated hemoglobin) (trHbN) (Hemoglobin-like protein HbN)	0	0	0	0	0	0	0	0	0	0	0	0	0	0	0	0	0	0	0	0	0	0	0	0	0	0	0	0	0	0	0	0	0	0	0	0
Rv1543|AJW49060.1|UB21_08260|ARN06116.1|BJM02_08225|Uncharacterized oxidoreductase Rv1543 (EC 1.-.-.-)	0	0	1	0	0	0	0	0	0	0	0	0	0	0	0	0	0	0	0	0	0	2	0	0	0	0	0	0	0	0	0	0	0	0	0	2
Rv1544|AJW49061.1|UB21_08265|ARN06117.1|BJM02_08230|Possible ketoacyl reductase	0	0	0	0	0	0	1	0	0	0	0	0	0	0	0	0	0	0	0	0	2	0	0	0	0	0	0	0	0	0	0	0	0	0	0	0
Rv1545|AJW49062.1|UB21_08270|ARN06118.1|BJM02_08235|Uncharacterized protein Rv1545	0	0	0	0	0	0	0	0	0	0	0	0	0	0	0	0	0	0	0	0	0	2	0	0	0	0	0	0	0	0	0	0	0	0	0	0
Rv1546|AJW49063.1|UB21_08275|*|*|Uncharacterized protein Rv1546	0	0	0	0	0	0	0	0	0	0	0	0	0	0	0	0	0	0	0	0	0	0	0	0	0	0	0	0	0	0	0	0	0	0	0	0
Rv1547|AJW49064.1|UB21_08280|ARN06119.1|BJM02_08245|DNA polymerase III subunit alpha (EC 2.7.7.7)	0	2	2	0	0	0	0	0	0	0	0	0	0	0	0	0	0	0	2	2	0	0	0	2	0	0	4	0	0	2	0	0	0	0	0	0
Rv1550|AJW49065.1|UB21_08290|ARN06120.1|BJM02_08255|Putative fatty-acid--CoA ligase fadD11 (EC 6.2.1.-) (Acyl-CoA synthetase)	0	0	0	0	0	0	0	0	0	0	0	0	0	0	0	0	0	0	0	0	0	0	0	0	0	0	0	0	0	0	0	0	0	0	0	0
Rv1552|AJW49067.1|UB21_08305|ARN06122.1|BJM02_08270|Fumarate reductase flavoprotein subunit (EC 1.3.5.4) (Quinol-fumarate reductase flavoprotein subunit) (QFR flavoprotein subunit)	0	0	0	0	0	0	0	0	0	0	0	0	0	0	0	0	0	0	0	0	0	0	0	0	0	0	0	0	0	0	0	0	0	0	0	0
Rv1553|AJW49068.1|UB21_08310|ARN06123.1|BJM02_08275|Fumarate reductase iron-sulfur subunit (EC 1.3.5.4) (Quinol-fumarate reductase iron-sulfur subunit) (QFR iron-sulfur subunit)	0	0	0	0	0	0	0	0	0	0	0	0	0	0	0	0	0	0	0	0	0	0	0	0	0	0	0	0	0	0	0	0	0	0	0	0
Rv1554|AJW49069.1|UB21_08315|ARN06124.1|BJM02_08280|Fumarate reductase subunit C (Quinol-fumarate reductase subunit C) (QFR subunit C)	0	0	0	0	0	0	0	0	0	0	0	0	0	0	0	0	0	0	0	0	0	0	0	0	0	0	0	0	0	0	0	0	0	0	0	0
Rv1555|AJW49070.1|UB21_08320|ARN06125.1|BJM02_08285|Fumarate reductase subunit D (Quinol-fumarate reductase subunit D) (QFR subunit D)	0	0	0	0	0	0	0	0	0	0	0	0	0	0	0	0	0	0	0	0	0	0	0	0	0	0	0	0	0	0	0	0	0	0	0	0
Rv1556|AJW49071.1|UB21_08325|ARN06126.1|BJM02_08290|Uncharacterized HTH-type transcriptional regulator Rv1556	0	0	0	0	0	0	0	0	0	0	0	0	0	0	0	0	0	0	0	0	0	0	0	2	0	0	0	0	0	0	0	0	0	0	0	0
Rv1558|AJW49072.1|UB21_08335|ARN06127.1|BJM02_08300|F420H(2)-dependent quinone reductase Rv1558 (Fqr) (EC 1.1.98.-)	0	0	0	0	0	0	0	0	2	0	0	1	0	0	0	0	0	0	0	0	0	0	0	0	0	0	0	0	0	0	0	0	0	0	0	2
Rv1559|AJW49073.1|UB21_08340|ARN06128.1|BJM02_08305|L-threonine dehydratase biosynthetic IlvA (EC 4.3.1.19) (Threonine deaminase)	0	0	0	0	0	0	0	0	0	0	0	0	0	0	0	0	0	0	0	0	0	0	0	0	0	0	0	0	0	0	0	0	0	0	0	0
Rv1560|AJW49074.1|UB21_08345|ARN06129.1|BJM02_08310|Antitoxin VapB11	0	0	0	0	0	0	0	0	0	0	0	0	0	0	0	0	0	0	0	0	0	0	0	0	0	0	0	0	0	0	0	0	0	0	0	0
Rv1561|AJW49075.1|UB21_08350|ARN06130.1|BJM02_08315|Ribonuclease VapC11 (RNase VapC11) (EC 3.1.-.-) (Toxin VapC11)	0	0	0	0	0	0	0	0	0	0	0	0	0	0	0	0	0	0	0	0	0	0	0	0	0	0	0	0	0	0	0	0	0	0	0	0
Rv1562c|AJW49076.1|UB21_08355|ARN06131.1|BJM02_08320|Malto-oligosyltrehalose trehalohydrolase (MTHase) (EC 3.2.1.141) (4-alpha-D-((1->4)-alpha-D-glucano)trehalose trehalohydrolase) (Maltooligosyl trehalose trehalohydrolase)	0	0	0	0	0	0	0	0	0	0	0	0	0	0	0	0	0	0	0	0	0	0	0	0	0	0	0	0	0	0	0	0	0	0	0	0
Rv1563c|AJW49077.1|UB21_08360|ARN06132.1|BJM02_08325|Putative maltooligosyl trehalose synthase (EC 5.4.99.15) ((1,4)-alpha-D-glucan 1-alpha-D-glucosylmutase)	0	0	0	0	0	0	0	0	0	0	0	0	0	0	0	0	0	0	0	0	0	0	0	0	0	0	0	0	0	0	0	0	0	0	0	0
Rv1564c|AJW49078.1|UB21_08365|ARN08401.1|BJM02_08330|Glycogen operon protein GlgX homolog (EC 3.2.1.-)	2	0	0	0	0	0	0	0	0	0	0	0	0	0	0	0	0	0	0	2	0	0	0	0	0	2	0	0	0	0	0	0	0	0	0	0
Rv1565c|AJW49079.1|UB21_08370|ARN06133.1|BJM02_08335|Conserved hypothetical membrane protein	0	0	0	0	0	0	0	0	0	0	0	0	2	0	0	0	0	0	0	0	0	0	0	0	0	0	0	0	0	0	0	0	0	0	0	0
Rv1566c|AJW49080.1|UB21_08375|ARN06134.1|BJM02_08340|Possible Inv protein	0	0	0	2	1	0	0	0	0	0	0	0	0	0	0	0	0	0	0	0	0	0	0	0	0	0	0	0	0	0	0	0	0	0	0	0
Rv1567c|AJW51227.1|UB21_08380|ARN08402.1|BJM02_08345|Probable hypothetical membrane protein	0	0	0	0	0	0	0	0	0	0	0	0	0	0	0	0	0	0	0	0	0	0	1	0	0	0	0	0	0	0	0	0	0	0	0	0
Rv1568|AJW49081.1|UB21_08385|ARN06135.1|BJM02_08350|Adenosylmethionine-8-amino-7-oxononanoate aminotransferase (EC 2.6.1.62) (7,8-diamino-pelargonic acid aminotransferase) (DAPA AT) (DAPA aminotransferase) (7,8-diaminononanoate synthase) (DANS) (7,8-diaminopelargonic acid synthase) (DAPAS) (Diaminopelargonic acid synthase)	0	0	0	1	0	0	0	0	0	0	0	0	0	0	0	0	0	0	0	0	0	0	0	0	2	0	0	0	0	0	0	0	0	0	0	0
Rv1569|AJW49082.1|UB21_08390|ARN06136.1|BJM02_08355|8-amino-7-oxononanoate synthase 1 (AONS) (EC 2.3.1.47) (7-keto-8-amino-pelargonic acid synthase) (7-KAP synthase) (KAPA synthase) (8-amino-7-ketopelargonate synthase)	1	0	0	0	0	0	0	0	0	0	0	0	0	0	0	0	0	0	0	0	0	0	0	0	0	2	0	0	0	0	0	0	0	0	0	0
Rv1571|AJW49083.1|UB21_08400|ARN06138.1|BJM02_08365|Conserved protein	0	0	1	0	0	0	0	0	0	0	0	0	0	0	0	0	0	0	0	0	0	0	0	0	0	0	0	0	0	0	0	0	0	0	0	0
Rv1589|AJW51228.1|UB21_08420|ARN08403.1|BJM02_08375|Biotin synthase (EC 2.8.1.6)	0	1	0	0	0	0	0	0	0	4	0	0	2	0	0	0	4	2	2	1	0	0	0	2	4	2	0	0	0	0	0	0	0	0	0	0
Rv1591|AJW49085.1|UB21_08430|ARN06140.1|BJM02_08385|Uncharacterized protein Rv1591	0	0	2	0	0	0	0	0	0	0	0	0	0	0	0	0	0	0	0	0	0	0	0	0	0	0	0	0	0	0	0	0	0	0	0	0
Rv1592c|AJW49086.1|UB21_08435|ARN06141.1|BJM02_08390|Probable inactive lipase Rv1592c	0	0	0	2	0	0	0	0	0	0	2	0	0	0	1	0	0	0	0	0	0	0	0	0	0	0	0	0	0	0	0	0	0	0	0	0
Rv1593c|AJW49087.1|UB21_08440|ARN06142.1|BJM02_08395|Conserved protein	0	0	0	0	0	0	0	0	0	0	0	1	0	0	0	0	0	0	0	0	0	0	0	0	0	0	0	0	0	0	0	0	0	0	0	0
Rv1594|AJW49088.1|UB21_08445|ARN06143.1|BJM02_08400|Quinolinate synthase A (EC 2.5.1.72)	0	0	0	0	0	0	0	0	0	0	0	0	2	0	2	2	0	0	0	0	0	0	0	2	2	0	0	0	0	0	2	2	2	0	0	0
Rv1595|AJW49089.1|UB21_08450|ARN06144.1|BJM02_08405|L-aspartate oxidase (LASPO) (EC 1.4.3.16) (Quinolinate synthase B)	2	2	2	3	2	0	3	0	0	0	2	2	1	0	2	0	1	0	0	3	5	3	1	2	5	1	1	2	2	1	0	4	2	1	5	1
Rv1596|AJW51229.1|UB21_08455|ARN08404.1|BJM02_08410|Nicotinate-nucleotide pyrophosphorylase [carboxylating] (EC 2.4.2.19) (Quinolinate phosphoribosyltransferase [decarboxylating]) (QAPRTase)	0	2	0	2	0	0	0	0	0	0	0	0	0	0	2	0	0	0	0	0	0	0	0	0	0	0	0	0	0	2	0	0	0	0	0	2
Rv1597|AJW49090.1|UB21_08460|ARN06145.1|BJM02_08415|Methyltransf_11 domain-containing protein	0	0	0	2	0	0	0	0	0	0	0	0	0	0	0	0	0	0	0	0	0	0	0	0	0	0	0	0	0	0	0	0	0	2	0	0
Rv1598c|AJW49091.1|UB21_08465|ARN06146.1|BJM02_08420|Conserved protein	0	0	0	0	0	0	0	0	0	0	0	0	0	0	0	0	0	0	0	0	0	0	0	0	0	0	0	0	0	0	0	0	0	2	0	0
Rv1599|AJW49092.1|UB21_08470|ARN06147.1|BJM02_08425|Histidinol dehydrogenase (HDH) (EC 1.1.1.23)	0	0	0	1	0	0	0	0	0	0	0	0	0	0	0	0	0	0	0	0	0	0	0	0	0	0	0	0	0	0	0	0	0	1	0	0
Rv1600|AJW49093.1|UB21_08475|ARN06148.1|BJM02_08430|Histidinol-phosphate aminotransferase (EC 2.6.1.9) (Imidazole acetol-phosphate transaminase)	4	0	0	0	0	0	0	0	0	0	0	1	0	0	0	0	0	0	0	0	2	0	0	0	0	0	0	0	0	0	0	0	0	0	0	0
Rv1601|AJW49094.1|UB21_08480|ARN06149.1|BJM02_08435|Imidazoleglycerol-phosphate dehydratase (IGPD) (EC 4.2.1.19)	0	0	0	0	0	0	0	0	0	0	0	0	0	0	0	0	0	0	0	0	0	0	0	0	0	0	0	0	0	0	0	0	0	0	0	0
Rv1602|AJW49095.1|UB21_08485|ARN06150.1|BJM02_08440|Imidazole glycerol phosphate synthase subunit HisH (EC 4.3.2.10) (IGP synthase glutaminase subunit) (EC 3.5.1.2) (IGP synthase subunit HisH) (ImGP synthase subunit HisH) (IGPS subunit HisH)	0	2	0	0	0	0	0	0	0	0	0	0	0	0	0	0	0	1	0	0	0	0	0	0	0	0	0	0	0	0	0	0	0	0	0	0
Rv1603|AJW49096.1|UB21_08490|ARN06151.1|BJM02_08445|Phosphoribosyl isomerase A (1-(5-phosphoribosyl)-5-[(5-phosphoribosylamino)methylideneamino] imidazole-4-carboxamide isomerase) (EC 5.3.1.16) (N-(5'-phosphoribosyl)anthranilate isomerase) (PRAI) (EC 5.3.1.24) (Phosphoribosylformimino-5-aminoimidazole carboxamide ribotide isomerase)	0	0	0	0	0	0	0	0	0	0	0	0	0	0	0	0	0	0	0	0	0	0	0	0	0	0	0	0	0	0	0	0	0	0	2	0
Rv1604|AJW49097.1|UB21_08495|ARN06152.1|BJM02_08450|Probable inositol 1-monophosphatase ImpA (I-1-Pase) (IMPase) (Inositol-1-phosphatase) (EC 3.1.3.25)	0	0	0	0	0	0	0	0	0	0	0	0	0	0	2	0	0	0	0	0	0	0	0	0	0	0	0	0	0	0	0	0	0	0	0	0
Rv1605|AJW49098.1|UB21_08500|ARN06153.1|BJM02_08455|Imidazole glycerol phosphate synthase subunit HisF (EC 4.3.2.10) (IGP synthase cyclase subunit) (IGP synthase subunit HisF) (ImGP synthase subunit HisF) (IGPS subunit HisF)	0	0	0	0	0	0	0	0	0	0	0	0	0	0	0	0	0	0	0	0	0	0	0	0	0	0	0	0	0	0	0	0	0	0	0	0
Rv1606|AJW49099.1|UB21_08505|ARN06154.1|BJM02_08460|Phosphoribosyl-AMP cyclohydrolase (PRA-CH) (EC 3.5.4.19)	0	0	0	0	0	0	0	0	0	0	0	0	0	0	0	0	0	0	0	0	0	0	0	0	0	0	0	0	0	0	0	0	0	0	0	0
Rv1607|AJW49100.1|UB21_08510|ARN06155.1|BJM02_08465|Probable ionic transporter integral membrane protein ChaA	0	0	0	0	0	0	0	0	0	0	0	0	0	0	0	0	0	0	0	0	0	0	2	0	0	0	0	0	0	0	0	0	0	0	0	0
Rv1608c|AJW49101.1|UB21_08515|ARN06156.1|BJM02_08470|Putative peroxiredoxin Rv1608c (EC 1.11.1.24) (Bacterioferritin comigratory protein) (Thioredoxin peroxidase) (Thioredoxin-dependent peroxiredoxin Rv1608c)	0	0	0	0	0	0	0	0	2	0	0	0	0	0	0	0	0	0	0	0	0	0	2	0	0	0	0	0	0	0	0	0	0	0	0	0
Rv1609|AJW51230.1|UB21_08520|ARN08405.1|BJM02_08475|Anthranilate synthase component 1 (AS) (ASI) (EC 4.1.3.27)	0	0	0	0	0	0	0	0	0	0	0	0	0	2	0	0	0	0	0	0	0	0	0	0	0	0	0	0	0	0	0	0	0	0	0	0
Rv1610|AJW49102.1|UB21_08525|ARN06157.1|BJM02_08480|Possible conserved membrane protein	0	0	0	0	0	0	0	2	0	0	0	0	0	0	2	0	0	0	0	0	2	0	0	0	1	0	0	0	0	0	0	0	0	0	0	0
Rv1611|AJW49103.1|UB21_08530|ARN06158.1|BJM02_08485|Indole-3-glycerol phosphate synthase (IGPS) (EC 4.1.1.48)	0	2	0	3	0	0	0	0	0	0	0	0	2	0	0	0	0	0	0	0	0	0	0	2	0	0	1	0	0	0	0	0	0	0	0	0
Rv1612|AJW49104.1|UB21_08535|ARN06159.1|BJM02_08490|Tryptophan synthase beta chain (EC 4.2.1.20)	0	0	0	0	0	0	0	0	0	0	0	0	0	0	0	0	0	0	0	0	0	0	0	0	0	0	1	0	0	0	0	2	0	0	0	0
Rv1613|AJW49105.1|UB21_08540|ARN06160.1|BJM02_08495|Tryptophan synthase alpha chain (EC 4.2.1.20)	0	0	0	0	0	0	0	0	0	0	0	0	0	0	0	0	0	0	0	0	0	0	0	0	0	2	0	0	0	0	0	0	0	0	0	0
Rv1614|AJW49106.1|UB21_08545|ARN06161.1|BJM02_08500|Phosphatidylglycerol--prolipoprotein diacylglyceryl transferase (EC 2.5.1.145)	0	2	0	0	0	0	0	0	0	0	0	0	0	0	0	0	0	0	0	0	0	0	0	0	0	0	0	0	4	0	0	0	0	0	0	0
Rv1615|AJW49107.1|UB21_08550|ARN06162.1|BJM02_08505|Probable membrane protein	0	0	0	0	2	0	0	0	0	0	0	0	0	0	0	0	0	0	0	0	0	0	0	0	0	0	0	0	0	0	0	0	0	0	0	0
Rv1616|AJW49108.1|UB21_08555|ARN06163.1|BJM02_08510|Conserved membrane protein	0	0	0	0	0	0	0	0	0	0	0	0	0	0	0	0	0	0	0	0	0	0	0	0	0	0	0	1	0	0	0	0	0	0	0	0
Rv1617|AJW49109.1|UB21_08560|ARN06164.1|BJM02_08515|Pyruvate kinase (PK) (EC 2.7.1.40)	0	0	0	0	0	0	0	0	0	0	0	0	0	0	0	2	0	0	2	0	0	0	0	0	0	0	0	0	0	0	0	0	0	0	0	0
Rv1618|AJW49110.1|UB21_08565|ARN06165.1|BJM02_08520|Probable acyl-CoA thioesterase II TesB1	0	0	2	0	0	0	0	0	0	0	0	0	0	0	0	0	0	0	0	0	0	0	0	0	0	0	0	0	0	1	0	0	0	0	0	0
Rv1619|AJW49111.1|UB21_08570|ARN06166.1|BJM02_08525|Conserved membrane protein	0	0	0	0	0	0	0	0	0	0	0	0	0	0	2	0	0	0	0	0	0	0	0	0	0	0	0	0	0	0	0	0	0	0	0	0
Rv1620c|AJW49112.1|UB21_08575|ARN06167.1|BJM02_08530|Probable 'component linked with the assembly of cytochrome' transport transmembrane ATP-binding protein ABC transporter CydC	2	0	0	0	0	0	0	0	0	0	0	0	0	0	0	0	0	0	0	0	0	0	0	0	0	2	1	0	0	0	1	0	0	0	0	0
Rv1621c|AJW49113.1|UB21_08580|ARN06168.1|BJM02_08535|Probable 'component linked with the assembly of cytochrome' transport transmembrane ATP-binding protein ABC transporter CydD	0	0	0	0	0	0	0	0	0	0	0	0	0	0	0	0	0	0	0	0	0	0	0	0	0	0	0	0	0	0	0	0	0	0	0	0
Rv1622c|AJW49114.1|UB21_08585|ARN06169.1|BJM02_08540|Probable integral membrane cytochrome D ubiquinol oxidase (Subunit II) CydB (Cytochrome BD-I oxidase subunit II)	0	0	0	0	0	0	0	0	0	0	0	0	0	0	0	0	0	0	0	0	0	0	0	0	0	0	0	0	0	0	0	0	0	0	0	0
Rv1623c|AJW49115.1|UB21_08590|ARN06170.1|BJM02_08545|Probable integral membrane cytochrome D ubiquinol oxidase (Subunit I) CydA (Cytochrome BD-I oxidase subunit I)	0	0	0	2	0	0	0	0	0	2	0	0	0	2	1	2	0	0	0	0	0	0	0	2	1	0	0	0	0	0	2	0	2	2	0	2
Rv1624c|AJW49116.1|UB21_08595|ARN06171.1|BJM02_08550|Probable conserved membrane protein	0	0	0	0	0	0	0	0	0	0	0	0	0	0	0	0	0	0	0	0	0	0	0	0	2	0	0	0	0	0	0	0	0	0	0	0
Rv1625c|AJW49117.1|UB21_08600|ARN06172.1|BJM02_08555|Adenylate cyclase (EC 4.6.1.1) (ATP pyrophosphate-lyase) (Adenylyl cyclase)	0	0	0	0	0	0	0	0	0	0	0	0	0	0	0	0	0	0	0	0	2	0	0	0	0	0	2	0	0	0	0	0	0	0	0	0
Rv1626|AJW49118.1|UB21_08610|ARN06173.1|BJM02_08565|Probable transcriptional regulatory protein PdtaR	2	0	0	0	0	0	0	0	0	0	0	0	0	0	0	0	0	0	0	0	2	0	0	0	0	0	0	0	0	0	0	0	2	0	0	0
Rv1627c|AJW49119.1|UB21_08615|ARN06174.1|BJM02_08570|Probable nonspecific lipid-transfer protein	0	1	2	0	0	0	0	0	2	0	0	0	0	0	2	0	1	0	0	0	0	0	0	0	0	0	0	0	0	0	2	0	0	0	0	0
Rv1628c|AJW49120.1|UB21_08620|ARN06175.1|BJM02_08575|Conserved protein	1	0	0	0	0	0	0	0	0	0	0	0	0	0	0	0	0	0	0	0	0	0	2	0	0	0	0	0	0	0	0	0	0	0	0	0
Rv1629|AJW49121.1|UB21_08625|ARN06176.1|BJM02_08580|DNA polymerase I (POL I) (EC 2.7.7.7)	2	0	0	0	0	1	1	0	0	0	0	1	0	0	0	0	0	0	0	0	0	0	0	0	1	0	2	0	0	0	2	0	0	0	0	0
Rv1633|AJW51231.1|UB21_08645|ARN08406.1|BJM02_08600|UvrABC system protein B (Protein UvrB) (Excinuclease ABC subunit B)	4	2	3	3	1	2	0	2	0	2	0	8	2	2	3	0	6	4	7	4	1	2	4	1	4	1	4	2	1	3	2	1	1	1	2	3
Rv1634|AJW49124.1|UB21_08650|ARN06180.1|BJM02_08605|Probable multidrug-efflux transporter Rv1634	0	0	0	0	0	0	0	0	0	0	0	0	0	0	0	0	0	0	0	0	0	0	0	0	2	0	0	0	2	2	0	0	0	0	0	0
Rv1635c|AJW51232.1|UB21_08655|ARN08407.1|BJM02_08610|Probable mannosyltransferase. Probable conserved transmembrane protein	1	0	0	0	0	0	0	0	0	0	0	0	0	2	0	0	0	0	0	0	0	2	0	2	0	0	0	0	1	0	0	0	0	0	0	0
Rv1636|AJW49125.1|UB21_08660|ARN06181.1|BJM02_08615|Universal stress protein Rv1636 (USP Rv1636)	0	0	0	0	0	0	0	2	0	0	0	0	0	0	0	0	0	0	0	0	0	0	0	0	0	0	0	0	4	0	0	0	0	0	0	0
Rv1637c|AJW51233.1|UB21_08665|ARN08408.1|BJM02_08620|Conserved protein	0	0	0	0	0	0	0	0	0	0	0	0	0	0	2	0	0	0	0	0	0	0	0	0	0	0	0	0	0	0	0	0	0	0	0	0
Rv1638|AJW51234.1|UB21_08670|ARN08409.1|BJM02_08625|UvrABC system protein A (UvrA protein) (Excinuclease ABC subunit A)	0	0	0	0	0	0	0	2	2	0	0	0	0	0	1	0	0	0	0	0	2	0	2	0	2	0	0	0	0	0	1	0	0	0	0	2
Rv1638A|AJW49126.1|UB21_08675|ARN06182.1|BJM02_08630|Uncharacterized protein	0	0	0	0	0	0	0	0	0	0	0	0	0	0	0	0	0	0	0	0	0	0	0	0	0	0	0	0	0	0	0	0	0	0	0	0
Rv1639c|AJW49127.1|UB21_08680|ARN06183.1|BJM02_08635|Conserved hypothetical membrane protein	0	0	2	0	0	0	0	0	0	0	0	0	0	0	0	0	0	2	0	0	0	0	0	2	0	0	0	0	2	2	0	0	0	0	0	0
Rv1641|AJW49129.1|UB21_08690|ARN06185.1|BJM02_08645|Translation initiation factor IF-3	2	1	0	0	0	0	0	0	2	0	3	0	1	0	1	0	0	0	0	0	1	2	0	2	1	1	3	0	0	1	0	2	0	0	0	2
Rv1642|AJW49130.1|UB21_08695|ARN06186.1|BJM02_08650|50S ribosomal protein L35	0	0	0	0	0	0	0	0	0	0	0	0	0	0	0	2	0	0	0	0	0	0	0	0	0	0	2	0	0	0	0	0	0	1	0	0
Rv1643|AJW49131.1|UB21_08700|ARN06187.1|BJM02_08655|50S ribosomal protein L20	0	0	0	0	0	0	0	0	0	0	0	1	0	0	0	0	0	0	0	0	0	2	1	2	1	0	0	0	0	0	0	0	0	1	4	0
Rv1644|AJW49132.1|UB21_08705|ARN06188.1|BJM02_08660|Possible 23S rRNA methyltransferase TsnR	0	0	0	0	0	0	0	0	0	0	0	0	2	2	0	0	0	0	0	1	0	0	0	0	0	0	0	0	0	0	0	0	0	0	0	0
Rv1645c|AJW49133.1|UB21_08710|ARN06189.1|BJM02_08665|DUF2236 domain-containing protein	0	1	2	1	0	0	0	0	0	1	1	1	0	0	0	0	0	0	0	3	0	0	1	1	0	0	1	1	0	1	0	0	1	0	1	0
Rv1646|AJW49134.1|UB21_08715|ARN06190.1|BJM02_08670|PE family protein PE17	0	0	2	0	0	0	0	0	0	0	0	0	0	0	0	0	0	0	0	0	2	0	0	0	0	0	0	0	0	0	1	0	0	0	0	0
Rv1647|AJW49135.1|UB21_08720|ARN06191.1|BJM02_08675|Adenylate cyclase (ATP pyrophosphate-lyase) (Adenylyl cyclase)	0	0	0	0	0	0	0	0	0	0	0	0	0	0	0	0	0	0	0	0	0	0	0	0	0	0	0	0	0	0	0	0	0	0	0	0
Rv1648|AJW49136.1|UB21_08725|ARN06192.1|BJM02_08680|Probable transmembrane protein	0	0	0	0	0	0	0	0	0	0	0	0	0	0	0	0	0	0	0	2	0	0	1	0	0	0	0	0	0	0	0	0	0	0	0	0
Rv1649|AJW49137.1|UB21_08730|ARN06193.1|BJM02_08685|Phenylalanine--tRNA ligase alpha subunit (EC 6.1.1.20) (Phenylalanyl-tRNA synthetase alpha subunit) (PheRS)	0	0	0	0	0	0	0	0	0	0	0	0	0	0	0	0	0	4	0	0	0	0	0	0	0	0	0	0	0	0	0	0	0	0	0	0
Rv1650|AJW49138.1|UB21_08735|ARN06194.1|BJM02_08690|Phenylalanine--tRNA ligase beta subunit (EC 6.1.1.20) (Phenylalanyl-tRNA synthetase beta subunit) (PheRS)	0	0	0	0	0	0	0	0	0	0	0	0	0	0	0	0	0	0	0	0	0	0	0	0	0	0	1	0	0	0	1	0	0	0	0	0
Rv1651c|AJW49139.1|UB21_08740|*|BJM02_08695|PE-PGRS family protein PE_PGRS30	2	0	0	0	2	0	1	0	0	1	0	1	0	4	0	0	1	1	0	0	0	0	0	2	1	0	2	2	0	0	1	0	0	0	0	0
Rv1652|AJW49140.1|UB21_08745|ARN06195.1|BJM02_08700|N-acetyl-gamma-glutamyl-phosphate reductase (AGPR) (EC 1.2.1.38) (N-acetyl-glutamate semialdehyde dehydrogenase) (NAGSA dehydrogenase)	0	0	0	0	0	0	0	0	0	0	0	0	0	0	0	0	0	0	0	0	0	0	0	0	0	0	0	0	0	0	2	0	0	0	0	0
Rv1653|AJW49141.1|UB21_08750|ARN06196.1|BJM02_08705|Arginine biosynthesis bifunctional protein ArgJ [Cleaved into: Arginine biosynthesis bifunctional protein ArgJ alpha chain; Arginine biosynthesis bifunctional protein ArgJ beta chain] [Includes: Glutamate N-acetyltransferase (EC 2.3.1.35) (Ornithine acetyltransferase) (OATase) (Ornithine transacetylase); Amino-acid acetyltransferase (EC 2.3.1.1)…	0	0	0	0	0	0	0	0	0	0	0	0	0	0	1	0	0	0	0	0	0	0	0	0	0	2	0	0	2	0	0	0	0	0	0	1
Rv1654|AJW49142.1|UB21_08755|ARN06197.1|BJM02_08710|Acetylglutamate kinase (EC 2.7.2.8) (N-acetyl-L-glutamate 5-phosphotransferase) (NAG kinase) (NAGK)	0	0	1	0	0	0	0	0	0	0	0	0	0	0	0	0	0	0	0	0	0	0	0	0	0	0	0	0	0	0	0	0	0	0	0	0
Rv1655|AJW49143.1|UB21_08760|ARN06198.1|BJM02_08715|Acetylornithine aminotransferase (ACOAT) (EC 2.6.1.11)	0	0	0	0	0	0	0	0	0	0	0	0	0	0	0	0	0	0	0	0	0	0	0	0	0	0	0	0	0	0	0	0	0	0	0	0
Rv1656|AJW49144.1|UB21_08765|ARN06199.1|BJM02_08720|Ornithine carbamoyltransferase (OTCase) (EC 2.1.3.3)	0	0	0	0	0	0	0	0	0	0	0	0	0	0	0	0	0	0	0	0	0	0	0	0	0	0	0	0	0	0	0	0	0	0	0	0
Rv1657|AJW49145.1|UB21_08770|ARN06200.1|BJM02_08725|Arginine repressor	1	0	0	0	0	0	0	0	0	0	0	0	0	0	0	0	0	0	0	0	0	0	0	0	0	0	0	0	0	0	0	0	0	0	0	0
Rv1658|AJW49146.1|UB21_08775|ARN06201.1|BJM02_08730|Argininosuccinate synthase (EC 6.3.4.5) (Citrulline--aspartate ligase)	0	0	0	0	0	0	0	0	0	0	0	0	0	0	0	0	0	0	0	0	0	0	0	0	0	2	0	0	0	2	0	0	0	0	0	0
Rv1659|AJW49147.1|UB21_08780|ARN06202.1|BJM02_08735|Argininosuccinate lyase (ASAL) (EC 4.3.2.1) (Arginosuccinase)	0	0	0	0	0	0	0	0	0	0	0	0	1	0	0	0	1	0	0	0	0	0	2	0	0	0	0	1	0	0	2	3	1	0	0	2
Rv1662|AJW49148.1|UB21_08795|ARN06205.1|BJM02_08750|Probable polyketide synthase Pks8	0	0	0	0	1	0	0	0	0	0	0	2	0	0	0	1	0	1	0	3	0	0	0	0	0	1	0	0	0	2	1	2	0	0	0	0
Rv1663|AJW51235.1|UB21_08800|ARN08410.1|BJM02_08755|Probable polyketide synthase Pks17	0	0	0	0	0	0	0	0	0	0	0	0	0	0	0	0	0	0	0	0	0	0	0	0	0	0	0	0	1	0	0	0	0	0	0	0
Rv1665|AJW49149.1|UB21_08810|ARN06207.1|BJM02_08765|Alpha-pyrone synthesis polyketide synthase-like Pks11 (EC 2.3.1.-) (Alpha-pyrone synthesis polyketide synthase type III Pks11) (Chalcone synthase-like protein) (CHS-like)	0	0	0	2	0	0	0	0	0	0	0	0	0	0	0	0	0	2	1	0	0	0	1	0	0	0	1	0	0	0	1	0	0	0	0	0
Rv1666c|AJW49150.1|UB21_08815|ARN06208.1|BJM02_08770|Putative cytochrome P450 139 (EC 1.14.-.-)	0	0	0	0	0	0	0	0	0	0	0	0	0	0	0	0	0	0	0	0	0	2	0	0	0	0	0	0	0	0	0	0	0	0	0	0
Rv1668c|AJW49151.1|UB21_08820|ARN06209.1|BJM02_08775|Probable first part of macrolide-transport ATP-binding protein ABC transporter	0	0	0	0	0	0	0	0	2	2	0	0	0	0	0	0	1	0	0	0	0	0	0	0	0	1	0	0	0	0	0	0	0	0	0	0
Rv1669|AJW49152.1|UB21_08825|ARN06210.1|BJM02_08780|Uncharacterized protein	0	0	0	0	0	0	0	0	0	0	0	0	0	0	0	0	0	0	0	0	0	0	0	0	0	0	0	0	0	0	0	0	0	0	0	0
Rv1670|AJW51236.1|UB21_08830|ARN08411.1|BJM02_08785|NTP_transf_9 domain-containing protein	0	0	0	0	0	0	0	0	0	0	0	0	0	0	0	0	0	0	0	0	0	0	0	0	0	0	0	0	0	0	0	0	0	0	0	0
Rv1671|AJW49153.1|UB21_08835|ARN06211.1|BJM02_08790|Probable membrane protein	0	0	0	0	0	0	0	0	0	0	0	0	0	0	0	0	0	0	0	0	0	0	0	0	0	0	0	0	0	0	0	0	0	0	0	0
Rv1672c|AJW49154.1|UB21_08840|ARN06212.1|BJM02_08795|Probable conserved integral membrane transport protein	0	1	0	0	0	0	0	0	0	2	0	0	0	0	0	0	1	0	1	0	0	0	0	0	0	0	2	0	0	0	0	0	0	0	0	0
Rv1673c|AJW49155.1|UB21_08845|ARN06213.1|BJM02_08800|TGc domain-containing protein	0	0	0	0	0	0	0	0	0	0	0	0	0	0	0	0	0	0	0	0	0	0	0	0	0	0	0	0	0	0	0	0	0	0	0	0
Rv1674c|AJW49156.1|UB21_08850|ARN06214.1|BJM02_08805|Thiosulfate sulfurtransferase (EC 2.8.1.1)	0	0	2	0	0	0	0	0	0	0	0	0	0	0	0	0	0	0	0	0	0	0	0	0	0	0	0	0	0	0	0	0	0	0	0	0
Rv1675c|AJW49157.1|UB21_08855|ARN06215.1|BJM02_08810|HTH-type transcriptional regulator Cmr	0	0	0	0	0	0	0	0	0	0	0	0	0	0	0	0	0	0	0	0	0	0	0	0	0	0	0	0	0	0	0	0	0	0	0	0
Rv1676|AJW49158.1|UB21_08860|ARN06216.1|BJM02_08815|AhpC-TSA domain-containing protein	8	6	7	2	4	0	0	2	2	1	0	0	1	0	0	2	4	2	0	7	0	1	0	0	1	5	1	0	0	2	4	1	0	2	1	0
Rv1677|AJW49159.1|UB21_08865|ARN06217.1|BJM02_08820|Probable conserved lipoprotein DsbF	0	0	0	0	0	0	0	0	0	0	0	0	0	0	0	0	0	0	0	0	0	0	0	0	0	0	0	0	2	0	0	0	2	0	0	0
Rv1678|AJW49160.1|UB21_08870|ARN06218.1|BJM02_08825|Probable integral membrane protein	2	0	0	1	0	0	0	0	0	0	0	0	0	0	0	0	0	0	0	0	0	0	0	0	0	0	0	0	0	0	0	0	0	0	0	0
Rv1679|AJW51237.1|UB21_08875|ARN08412.1|BJM02_08830|Possible acyl-CoA dehydrogenase FadE16	0	0	0	0	0	0	0	0	0	0	0	0	0	0	0	0	0	0	0	0	0	0	0	0	0	0	0	0	0	0	0	0	0	0	0	0
Rv1680|AJW49161.1|UB21_08880|ARN06219.1|BJM02_08835|Uncharacterized protein	0	0	0	0	0	0	0	0	0	0	0	0	0	0	0	0	0	0	0	0	0	0	2	0	0	0	0	0	0	0	0	0	0	0	0	0
Rv1681|AJW49162.1|UB21_08885|ARN06220.1|BJM02_08840|Possible molybdopterin biosynthesis protein MoeX	0	0	0	0	0	0	0	0	0	0	0	1	0	0	0	0	0	0	0	0	0	1	0	0	0	0	1	0	0	0	0	0	0	0	0	0
Rv1682|AJW49163.1|UB21_08890|ARN06221.1|BJM02_08845|Probable coiled-coil structural protein	0	0	0	0	0	0	0	0	0	0	0	0	0	2	0	0	0	0	0	0	0	0	4	0	2	0	2	0	0	0	2	2	0	0	2	2
Rv1683|AJW51238.1|UB21_08895|ARN08413.1|BJM02_08850|Possible bifunctional enzyme long-chain acyl-CoA synthase and lipase	0	0	0	0	0	0	0	0	0	2	0	2	4	2	0	2	0	0	0	2	0	0	0	0	0	0	0	0	0	0	0	0	0	0	0	0
Rv1684|AJW49164.1|UB21_08900|ARN06222.1|BJM02_08855|UPF0434 protein Rv1684	0	0	0	0	0	0	0	0	0	0	0	0	0	0	0	0	0	0	0	0	0	0	0	0	0	0	0	0	0	0	0	0	0	0	0	0
Rv1685c|AJW49165.1|UB21_08905|ARN06223.1|BJM02_08860|HTH tetR-type domain-containing protein	0	0	0	0	0	0	0	0	0	0	0	0	0	0	0	0	0	0	0	0	0	0	0	0	0	0	0	0	0	0	0	0	0	0	0	0
Rv1686c|AJW49166.1|UB21_08910|ARN06224.1|BJM02_08865|Transport permease protein	0	0	0	0	0	0	0	0	0	0	0	0	0	0	0	0	0	0	0	0	0	0	0	0	0	0	0	0	0	0	0	0	0	0	0	0
Rv1687c|AJW49167.1|UB21_08915|ARN06225.1|BJM02_08870|Probable conserved ATP-binding protein ABC transporter	0	0	0	0	0	0	0	0	0	0	0	0	0	0	0	0	0	0	0	0	0	0	0	0	0	0	0	0	0	0	0	0	0	0	0	0
Rv1688|AJW49168.1|UB21_08920|ARN06226.1|BJM02_08875|Putative 3-methyladenine DNA glycosylase (EC 3.2.2.-)	0	0	0	0	0	0	0	0	0	0	0	0	0	0	0	0	0	0	0	0	0	0	0	0	0	0	0	0	0	0	0	2	0	0	0	0
Rv1689|AJW49169.1|UB21_08925|ARN06227.1|BJM02_08880|Tyrosine--tRNA ligase (EC 6.1.1.1) (Tyrosyl-tRNA synthetase) (TyrRS)	0	0	0	0	0	0	0	0	0	0	0	0	0	0	0	0	0	0	0	0	0	0	0	0	0	0	0	0	0	0	2	0	0	0	0	0
Rv1690|AJW49170.1|UB21_08930|ARN06228.1|BJM02_08885|Putative lipoprotein LprJ	0	0	0	0	0	0	0	0	0	0	0	0	0	0	0	0	0	0	0	0	0	0	0	0	0	0	0	0	0	0	0	0	0	0	0	1
Rv1691|AJW51239.1|UB21_08935|ARN08414.1|BJM02_08890|Uncharacterized protein	0	0	0	0	0	0	0	0	0	0	0	0	0	0	0	0	0	0	0	0	0	0	0	0	0	0	0	0	0	0	0	0	0	0	0	0
Rv1692|AJW49171.1|UB21_08940|ARN06229.1|BJM02_08895|D,L-glycerol 3-phosphate phosphatase (G3P phosphatase) (EC 3.1.3.21)	0	1	2	0	0	0	0	0	0	0	0	0	0	0	0	0	0	1	0	0	0	1	0	0	1	0	0	0	0	0	0	2	0	0	0	0
Rv1693|AJW49172.1|UB21_08945|ARN06230.1|BJM02_08900|Uncharacterized protein	0	0	0	0	0	0	0	0	0	0	0	0	0	0	0	0	0	1	0	0	0	0	0	0	0	0	0	0	0	0	0	0	0	0	0	0
Rv1694|AJW49173.1|UB21_08950|ARN06231.1|BJM02_08905|16S/23S rRNA (cytidine-2'-O)-methyltransferase TlyA (EC 2.1.1.226) (EC 2.1.1.227) (16S rRNA (cytidine1409-2'-O)-methyltransferase) (23S rRNA (cytidine1920-2'-O)-methyltransferase) (Hemolysin TlyA)	0	0	0	0	0	0	0	0	0	0	1	0	0	0	0	0	0	0	0	0	0	0	0	0	0	0	0	0	0	0	0	0	0	0	0	0
Rv1696|AJW49175.1|UB21_08960|ARN06233.1|BJM02_08915|DNA repair protein RecN (Recombination protein N)	0	0	0	0	0	2	0	0	0	0	0	0	0	0	0	0	0	0	0	0	0	0	0	0	0	0	0	0	0	0	0	0	0	0	0	0
Rv1697|AJW49176.1|UB21_08965|ARN06234.1|BJM02_08920|TPPK_C domain-containing protein	1	0	0	0	0	0	0	0	0	0	0	0	0	0	2	0	0	0	0	0	0	0	0	0	0	0	2	2	0	0	0	2	0	0	0	0
Rv1698|AJW49177.1|UB21_08970|ARN06235.1|BJM02_08925|Copper transporter MctB (Mycobacterial copper transport protein B)	0	0	2	0	0	0	0	0	0	0	0	0	0	0	0	0	0	0	0	0	0	0	0	4	0	0	0	0	0	0	0	0	0	0	0	0
Rv1699|AJW49178.1|UB21_08975|ARN06236.1|BJM02_08930|CTP synthase (EC 6.3.4.2) (Cytidine 5'-triphosphate synthase) (Cytidine triphosphate synthetase) (CTP synthetase) (CTPS) (UTP--ammonia ligase)	1	0	0	0	0	0	0	0	0	0	0	0	0	0	0	0	0	0	0	0	0	0	0	0	2	0	0	0	2	0	0	0	0	0	0	0
Rv1700|AJW49179.1|UB21_08980|ARN06237.1|BJM02_08935|ADP-ribose pyrophosphatase (EC 3.6.1.13) (8-oxo-(d)GDP phosphatase) (EC 3.6.1.58) (ADPR hydrolase) (MT-ADPRase)	0	0	4	0	0	0	0	0	0	0	0	0	0	0	0	0	0	0	0	0	0	0	0	0	0	0	0	0	0	0	0	0	0	0	0	0
Rv1701|AJW49180.1|UB21_08985|ARN06238.1|BJM02_08940|Tyrosine recombinase XerD	0	0	0	0	0	0	0	0	0	0	0	0	0	0	0	0	2	0	0	0	0	0	0	0	0	0	0	0	0	0	0	2	0	0	0	0
Rv1703c|AJW49181.1|UB21_08995|ARN06239.1|BJM02_08950|Probable catechol-O-methyltransferase	0	0	0	0	0	0	0	0	0	0	0	0	0	0	0	0	0	0	0	1	0	2	0	0	2	0	0	0	2	0	0	0	0	0	0	0
Rv1704c|AJW49182.1|UB21_09000|ARN06240.1|BJM02_08955|Probable D-serine/alanine/glycine transporter protein CycA	0	1	0	1	0	0	0	0	0	2	0	0	0	2	0	0	0	0	2	0	0	0	0	0	0	0	0	0	0	0	0	0	0	0	0	0
Rv1705c|AJW49183.1|UB21_09005|ARN06241.1|BJM02_08960|Uncharacterized PPE family protein PPE22	0	0	0	0	0	0	0	0	0	0	0	0	0	0	0	0	2	0	0	0	0	0	0	0	0	0	0	0	0	0	0	0	0	0	2	0
Rv1706A|AJW49184.1|UB21_09015|ARN06243.1|BJM02_08970|Uncharacterized protein	0	0	0	0	0	0	0	0	0	0	0	0	0	0	0	0	0	0	0	0	0	0	0	0	0	0	0	0	0	0	0	0	0	0	0	0
Rv1706c|AJW51240.1|UB21_09010|ARN06242.1|BJM02_08965|Uncharacterized PPE family protein PPE23	0	0	0	0	0	0	0	0	0	0	0	0	0	0	0	0	0	0	0	0	0	0	0	0	0	0	0	0	0	0	0	0	0	0	0	0
Rv1707|AJW49185.1|UB21_09020|ARN06244.1|BJM02_08975|Probable conserved transmembrane protein	0	0	0	0	0	0	0	0	0	0	0	0	2	0	0	0	0	0	0	0	0	0	0	0	0	0	0	0	0	0	0	0	0	0	0	0
Rv1708|AJW49186.1|UB21_09025|ARN06245.1|BJM02_08980|Uncharacterized protein Rv1708	0	0	0	0	0	0	0	0	2	0	0	0	0	0	0	0	0	0	0	0	0	0	0	0	0	0	0	0	0	0	0	0	0	0	0	0
Rv1709|AJW49187.1|UB21_09030|ARN06246.1|BJM02_08985|Possible segregation and condensation protein ScpA	0	0	0	0	0	0	0	0	0	0	0	0	0	0	0	0	0	0	0	0	0	0	0	0	0	0	0	0	0	0	0	0	0	0	0	0
Rv1710|AJW49188.1|UB21_09035|ARN06247.1|BJM02_08990|Possible segregation and condensation protein ScpB	0	0	0	0	0	0	0	0	0	0	0	0	0	0	0	0	0	0	0	0	0	0	0	0	0	0	0	0	0	0	0	0	0	0	0	0
Rv1711|AJW49189.1|UB21_09040|ARN06248.1|BJM02_08995|Uncharacterized RNA pseudouridine synthase Rv1711 (EC 5.4.99.-) (RNA pseudouridylate synthase) (RNA-uridine isomerase)	0	0	0	0	0	0	0	0	0	0	0	0	0	0	0	0	0	0	0	0	0	0	0	0	0	0	0	0	0	0	0	0	0	0	0	0
Rv1712|AJW49190.1|UB21_09045|ARN06249.1|BJM02_09000|Cytidylate kinase (CK) (EC 2.7.4.25) (Cytidine monophosphate kinase) (CMP kinase)	0	0	0	0	0	0	0	0	0	0	0	0	0	0	1	0	0	0	0	0	0	0	0	0	0	0	0	0	0	0	0	0	0	0	0	0
Rv1714|AJW49192.1|UB21_09055|ARN06251.1|BJM02_09010|Uncharacterized oxidoreductase Rv1714 (EC 1.-.-.-)	0	0	0	0	0	0	0	0	0	0	0	0	0	0	0	0	0	0	0	0	0	0	0	0	0	0	0	0	0	0	0	0	0	0	0	0
Rv1715|AJW49193.1|UB21_09060|ARN06252.1|BJM02_09015|Probable 3-hydroxybutyryl-CoA dehydrogenase FadB3 (Beta-hydroxybutyryl-CoA dehydrogenase) (BHBD)	0	0	0	0	0	0	0	0	0	0	0	0	0	0	0	0	0	0	0	0	0	0	0	0	0	0	0	0	0	0	0	0	0	0	0	0
Rv1716|AJW49194.1|UB21_09065|ARN06253.1|BJM02_09020|Uncharacterized protein	0	0	0	0	0	0	0	0	0	0	0	0	0	0	0	0	0	0	0	0	0	0	0	0	0	0	0	0	0	0	0	0	0	0	0	0
Rv1717|AJW49195.1|UB21_09070|ARN06254.1|BJM02_09025|Cupin_2 domain-containing protein	0	0	0	0	0	0	0	0	0	0	0	0	0	0	0	0	0	0	0	0	0	0	0	0	0	0	0	0	0	0	0	0	0	0	0	0
Rv1718|AJW49196.1|UB21_09075|ARN06255.1|BJM02_09030|Uncharacterized protein	0	0	0	0	0	0	0	0	0	0	0	0	0	0	0	0	0	0	0	0	0	0	0	0	0	0	0	0	0	0	0	0	0	0	2	0
Rv1719|AJW49197.1|UB21_09080|ARN06256.1|BJM02_09035|Probable transcriptional regulatory protein	0	0	1	0	0	0	0	0	0	1	0	0	2	0	0	0	2	1	0	0	0	1	1	0	0	0	0	1	0	0	0	0	0	0	0	0
Rv1720c|AJW49199.1|UB21_09095|ARN06258.1|BJM02_09050|Ribonuclease VapC12 (RNase VapC12) (EC 3.1.-.-) (Toxin VapC12)	0	0	0	0	0	0	0	0	0	0	0	0	0	0	0	0	0	0	0	0	0	0	0	0	0	0	0	0	0	0	0	0	0	0	0	0
Rv1721c|AJW49200.1|UB21_09100|ARN06259.1|BJM02_09055|Putative antitoxin VapB12	0	0	0	0	0	0	0	0	0	0	0	0	0	0	0	0	0	0	0	0	0	0	0	0	0	0	0	0	0	0	0	0	0	0	0	0
Rv1722|AJW51241.1|UB21_09105|ARN08415.1|BJM02_09060|Possible carboxylase	0	0	0	0	0	0	0	0	0	0	0	0	0	0	0	0	0	2	0	0	0	2	0	0	0	0	0	0	0	0	0	0	0	0	0	0
Rv1723|AJW49201.1|UB21_09110|ARN06260.1|BJM02_09065|Probable hydrolase	0	0	0	0	0	0	0	0	0	0	0	0	0	0	0	0	0	0	0	0	0	0	0	0	0	0	0	2	0	0	0	0	0	0	0	0
Rv1724c|AJW49202.1|UB21_09115|ARN06261.1|BJM02_09070|Uncharacterized protein	0	0	0	0	0	0	0	0	0	0	0	0	0	0	0	0	0	0	0	0	0	0	0	0	0	0	0	0	0	0	0	0	0	0	0	0
Rv1725c|AJW49203.1|UB21_09120|ARN06262.1|BJM02_09075|HTH hxlR-type domain-containing protein	0	0	0	0	0	0	0	0	0	0	0	0	0	0	0	0	0	0	0	0	0	0	0	0	0	0	0	0	0	0	2	0	0	0	0	0
Rv1726|AJW49204.1|UB21_09125|ARN06263.1|BJM02_09080|Probable oxidoreductase	0	0	0	0	0	0	0	0	0	0	0	0	0	0	0	0	0	0	0	0	0	0	0	0	0	0	1	0	0	0	0	0	0	0	0	0
Rv1727|AJW49205.1|UB21_09130|ARN06264.1|BJM02_09085|MDMPI_N domain-containing protein	0	0	0	0	0	0	0	0	0	0	0	0	0	0	0	0	0	0	0	0	0	0	0	0	0	0	0	0	0	0	0	0	0	0	0	0
Rv1728c|AJW51242.1|UB21_09135|ARN08416.1|BJM02_09090|Uncharacterized protein	0	0	0	0	0	0	0	0	0	0	0	0	2	0	0	0	0	0	0	0	0	0	0	0	0	0	0	0	2	0	2	0	0	0	0	0
Rv1729c|AJW49206.1|UB21_09140|ARN06265.1|BJM02_09095|Putative S-adenosyl-L-methionine-dependent methyltransferase Rv1729c (EC 2.1.1.-)	0	0	0	0	0	0	0	0	0	0	1	0	0	0	0	0	0	0	0	0	0	0	0	0	0	0	0	0	0	0	0	0	0	0	0	0
Rv1730c|AJW51244.1|UB21_09155|ARN08418.1|BJM02_09110|Possible penicillin-binding protein	0	0	0	0	0	0	0	0	0	0	0	0	0	0	0	0	0	0	0	0	0	0	0	1	0	0	0	0	0	0	0	0	0	0	0	3
Rv1731|AJW49208.1|UB21_09160|ARN06267.1|BJM02_09115|Putative succinate-semialdehyde dehydrogenase [NADP(+)] 2 (SSADH 2) (SSDH 2) (EC 1.2.1.79)	0	0	0	0	0	0	0	0	2	0	0	0	0	0	0	0	0	0	0	0	0	2	0	0	0	0	0	0	2	2	0	2	0	0	0	0
Rv1732c|AJW49209.1|UB21_09165|ARN06268.1|BJM02_09120|Conserved protein	0	0	0	0	0	0	0	0	0	0	0	0	0	0	0	0	0	0	0	0	0	1	0	0	0	0	0	0	1	2	0	0	0	0	0	0
Rv1733c|AJW49210.1|UB21_09170|ARN06269.1|BJM02_09125|Probable membrane protein Rv1733c	0	0	0	0	0	0	0	0	0	0	0	0	0	0	0	0	0	0	0	0	0	1	0	4	0	0	0	0	0	0	0	0	0	0	0	0
Rv1734c|AJW49211.1|UB21_09175|ARN06270.1|BJM02_09130|Uncharacterized protein Rv1734c	0	2	0	0	0	0	0	0	0	0	0	0	0	0	0	0	0	0	0	0	0	0	0	0	1	0	1	0	2	0	0	0	0	0	0	0
Rv1735c|AJW49212.1|UB21_09180|ARN06271.1|BJM02_09135|Uncharacterized membrane protein Rv1735c	0	0	0	0	0	0	0	0	0	0	0	0	0	0	0	0	0	0	0	0	0	0	0	0	0	0	0	0	0	0	0	0	0	0	0	0
Rv1737c|AJW49214.1|UB21_09195|ARN06273.1|BJM02_09150|Probable nitrate/nitrite transporter NarK2	0	0	0	0	1	0	0	0	0	0	1	0	0	0	0	0	0	4	0	0	0	0	0	0	0	2	2	0	0	0	0	0	0	0	0	0
Rv1738|AJW51246.1|UB21_09200|ARN08420.1|BJM02_09155|Uncharacterized protein Rv1738	0	0	0	0	0	0	0	0	0	0	0	0	0	0	4	0	0	0	0	0	0	0	0	0	2	4	0	0	2	0	4	4	0	0	0	0
Rv1739c|AJW49215.1|UB21_09205|ARN06274.1|BJM02_09160|Probable sulfate transporter Rv1739c	0	0	0	0	0	0	0	0	0	0	0	0	0	0	0	0	0	0	0	0	0	0	0	0	0	0	0	0	0	0	0	0	0	0	0	0
Rv1740|AJW49216.1|UB21_09210|ARN06275.1|BJM02_09165|Putative antitoxin VapB34	0	0	0	0	0	0	0	0	0	0	0	0	0	0	0	0	0	0	0	0	0	0	0	0	0	0	0	0	0	0	0	0	0	0	0	0
Rv1741|AJW49217.1|UB21_09215|ARN06276.1|BJM02_09170|Putative ribonuclease VapC34 (Putative RNase VapC34) (EC 3.1.-.-) (Toxin VapC34)	0	0	0	0	0	0	0	0	0	0	0	0	0	0	2	0	0	0	0	0	0	0	0	0	0	0	0	0	0	0	0	0	0	0	0	0
Rv1742|AJW49218.1|UB21_09220|ARN06277.1|BJM02_09175|Uncharacterized protein	0	0	0	0	0	0	0	0	0	0	0	0	0	0	0	0	0	0	0	0	0	0	0	0	0	0	0	0	0	0	0	0	0	0	0	0
Rv1743|AJW49219.1|UB21_09225|ARN06278.1|BJM02_09180|Serine/threonine-protein kinase PknE (EC 2.7.11.1)	0	0	2	0	1	0	0	0	0	0	0	0	0	0	0	0	0	0	0	1	0	0	0	0	1	0	2	0	0	0	0	0	0	0	0	0
Rv1744c|AJW49220.1|UB21_09230|ARN06279.1|BJM02_09185|Probable membrane protein	0	0	0	0	0	0	0	0	0	0	0	0	1	0	0	0	0	0	0	0	0	0	0	0	0	0	0	0	0	0	0	0	0	0	0	0
Rv1745c|AJW49221.1|UB21_09235|ARN06280.1|BJM02_09190|Isopentenyl-diphosphate Delta-isomerase (IPP isomerase) (EC 5.3.3.2) (IPP:DMAPP isomerase) (Isopentenyl pyrophosphate isomerase)	0	0	0	0	0	0	0	0	0	0	0	0	0	0	0	0	0	0	0	0	0	0	0	0	0	0	0	0	0	0	0	0	0	0	0	0
Rv1746|AJW49222.1|UB21_09240|ARN06281.1|BJM02_09195|Serine/threonine-protein kinase PknF (EC 2.7.11.1)	0	0	0	0	0	0	0	0	0	0	0	0	0	0	0	0	0	0	0	0	0	0	0	2	2	0	0	0	0	0	2	0	0	0	0	0
Rv1747|AJW51247.1|UB21_09245|ARN06282.1|BJM02_09200|ABC transporter ATP-binding/permease protein Rv1747 (EC 7.-.-.-)	0	4	0	0	0	0	0	0	0	0	0	0	0	0	0	0	0	0	0	0	0	2	0	0	2	0	0	0	0	0	2	0	0	0	0	0
Rv1748|AJW49223.1|UB21_09250|ARN06283.1|BJM02_09205|Uncharacterized protein	0	0	1	0	0	0	0	0	0	0	0	0	0	0	0	0	0	0	0	0	0	0	0	0	0	0	1	0	0	0	0	0	0	0	0	0
Rv1749c|AJW49224.1|UB21_09255|ARN06284.1|BJM02_09210|Possible integral membrane protein	0	0	0	0	0	0	0	0	0	0	0	0	0	0	0	0	0	0	0	0	0	0	0	0	0	0	0	0	2	0	0	0	0	0	0	0
Rv1750c|AJW49225.1|UB21_09260|ARN06285.1|BJM02_09215|Possible fatty-acid-CoA ligase FadD1 (Fatty-acid-CoA synthetase) (Fatty-acid-CoA synthase)	0	0	0	0	0	0	0	0	0	0	0	2	2	0	0	0	0	0	0	0	0	0	0	0	0	0	0	0	0	0	0	0	0	0	0	0
Rv1751|AJW51248.1|UB21_09265|ARN08421.1|BJM02_09220|Probable oxidoreductase	0	0	0	0	0	0	0	0	0	0	0	0	0	0	0	0	0	0	0	0	0	0	0	0	0	0	2	0	0	2	4	0	0	0	0	0
Rv1752|AJW49226.1|UB21_09270|ARN06286.1|BJM02_09225|Uncharacterized protein	0	0	0	0	0	0	0	0	0	0	0	0	0	0	0	0	0	0	0	0	0	0	0	0	0	0	0	0	0	0	0	0	0	0	0	0
Rv1754c|AJW49227.1|UB21_09280|ARN06287.1|BJM02_09235|Conserved protein	0	0	0	0	0	0	0	0	0	0	0	0	0	0	0	0	0	0	0	0	1	0	0	0	0	0	0	0	0	2	0	0	1	0	0	0
Rv1765A|AJW49230.1|UB21_09295|ARN06290.1|BJM02_09250|Putative transposase	0	0	0	0	0	0	0	0	0	0	0	0	0	0	1	0	0	0	0	0	0	0	0	0	0	0	0	3	0	0	0	0	0	0	0	0
Rv1766|AJW49231.1|UB21_09300|ARN06291.1|BJM02_09255|Conserved protein	0	0	0	0	0	0	0	0	0	0	0	0	0	0	0	0	0	0	0	0	0	0	0	0	0	0	0	0	0	0	0	0	0	0	0	0
Rv1767|AJW49232.1|UB21_09305|ARN06292.1|BJM02_09260|Conserved protein	0	0	0	0	0	0	0	0	0	0	0	0	0	0	0	0	0	0	0	0	0	0	0	0	0	0	0	0	0	0	0	0	0	0	0	0
Rv1769|AJW49233.1|UB21_09315|ARN06294.1|BJM02_09270|Conserved protein	0	0	0	0	0	0	0	0	2	0	0	0	0	0	0	0	0	2	0	0	0	0	0	0	0	0	2	0	0	0	0	0	0	0	0	0
Rv1772|AJW49234.1|UB21_09330|ARN06297.1|BJM02_09285|ANTAR domain-containing protein	0	0	0	0	0	0	0	0	0	0	0	0	0	0	0	2	0	0	0	0	0	0	0	0	0	0	0	0	0	0	0	0	0	0	0	0
Rv1773c|AJW51249.1|UB21_09335|ARN08422.1|BJM02_09290|Probable transcriptional regulatory protein	0	0	0	0	0	0	0	0	0	0	0	0	0	0	0	0	0	0	0	0	0	0	0	0	0	0	0	0	0	0	0	0	0	0	0	0
Rv1774|AJW49235.1|UB21_09340|ARN06298.1|BJM02_09295|Probable oxidoreductase	0	0	0	0	0	0	0	0	0	0	0	0	0	0	0	0	0	0	0	0	0	0	0	0	0	0	0	0	0	0	0	0	0	0	0	0
Rv1775|AJW49236.1|UB21_09345|ARN06299.1|BJM02_09300|DAPG_hydrolase domain-containing protein	0	0	0	0	0	0	0	0	0	0	0	0	0	0	0	0	0	0	0	0	0	0	0	0	0	0	0	0	0	0	0	0	0	0	0	0
Rv1776c|AJW49237.1|UB21_09350|ARN06300.1|BJM02_09305|Possible transcriptional regulatory protein	0	0	0	0	0	0	0	0	0	0	0	0	0	0	0	0	0	0	0	0	0	0	0	0	0	0	0	0	0	0	0	0	0	0	0	0
Rv1777|AJW49238.1|UB21_09355|ARN06301.1|BJM02_09310|Cytochrome P450 144 (EC 1.14.-.-)	0	0	0	0	0	0	0	0	0	0	0	0	0	0	0	0	0	0	0	0	0	0	0	0	0	0	0	0	0	0	0	0	0	0	0	0
Rv1778c|AJW51250.1|UB21_09360|ARN08423.1|BJM02_09315|Uncharacterized protein	0	0	0	0	0	0	0	0	2	0	2	0	2	0	0	0	0	0	0	0	0	0	0	0	0	0	0	0	0	0	0	0	0	0	0	0
Rv1779c|AJW49239.1|UB21_09365|ARN06302.1|BJM02_09320|Possible integral membrane protein	0	0	0	0	0	0	0	0	0	0	0	0	0	2	2	0	0	2	0	0	0	2	0	0	0	0	0	0	0	0	0	0	0	0	0	0
Rv1780|AJW49240.1|UB21_09370|ARN06303.1|BJM02_09325|Conserved protein	0	0	0	0	0	0	0	0	0	0	0	0	0	0	0	0	0	0	0	0	0	0	0	0	0	0	0	0	0	0	2	1	0	0	0	0
Rv1781c|AJW51251.1|UB21_09375|ARN08424.1|BJM02_09330|4-alpha-glucanotransferase (EC 2.4.1.25) (Amylomaltase) (Disproportionating enzyme) (D-enzyme)	0	1	0	0	0	0	0	0	0	0	0	0	0	0	0	0	0	0	0	0	0	0	0	0	0	0	0	0	0	0	0	0	0	0	0	2
Rv1782|AJW49241.1|UB21_09380|ARN06304.1|BJM02_09335|ESX-5 secretion system ATPase EccB5 (EC 3.6.-.-) (ESX conserved component B5) (Type VII secretion system protein EccB5) (T7SS protein EccB5)	0	2	0	0	0	1	0	0	2	0	0	0	0	0	0	0	0	0	2	0	0	0	0	0	0	0	2	0	0	0	2	0	0	0	0	0
Rv1785c|AJW49242.1|UB21_09390|ARN06306.1|BJM02_09345|Putative cytochrome P450 143 (EC 1.14.-.-)	0	2	0	0	0	0	0	0	0	0	0	0	0	0	0	0	0	0	0	1	0	2	0	0	0	0	0	0	0	0	0	0	0	0	0	0
Rv1786|AJW49243.1|UB21_09395|ARN06307.1|BJM02_09350|Probable ferredoxin	0	0	0	0	0	0	0	0	0	0	0	0	0	0	0	0	0	0	0	0	0	0	0	0	0	0	0	0	0	0	0	0	0	0	0	0
Rv1787|AJW51252.1|UB21_09400|ARN08425.1|BJM02_09355|Uncharacterized PPE family protein PPE25	1	0	0	0	1	2	0	0	0	0	0	0	0	2	0	0	2	0	2	0	0	0	0	2	1	3	4	1	0	0	0	2	2	0	0	0
Rv1788|AJW49244.1|UB21_09405|ARN06308.1|BJM02_09360|PE family protein PE18	0	0	0	0	0	0	0	0	0	0	0	2	0	0	0	0	0	0	0	0	0	0	0	0	0	0	0	0	0	0	0	0	0	0	1	0
Rv1789|AJW49245.1|UB21_09410|ARN06309.1|BJM02_09365|PPE family protein PPE26	2	0	0	0	0	0	0	0	0	0	0	0	0	0	0	0	0	0	0	0	2	0	0	0	2	0	0	0	0	0	1	0	0	0	0	0
Rv1790|AJW49246.1|UB21_09415|ARN06310.1|BJM02_09370|PPE family protein PPE27	1	0	0	0	0	0	0	0	0	0	0	0	0	0	0	0	0	0	0	0	0	0	0	0	1	1	0	1	0	0	0	0	0	0	0	0
Rv1791|AJW49247.1|UB21_09420|ARN06311.1|BJM02_09375|PE family protein PE19	0	2	3	0	1	0	0	0	4	0	0	0	0	1	0	0	2	0	0	0	1	0	0	1	1	2	2	0	4	2	1	0	0	0	0	0
Rv1794|AJW49250.1|UB21_09435|ARN06314.1|BJM02_09390|ESX-5 secretion-associated protein EspG5	2	1	2	0	0	2	0	0	1	2	0	2	2	0	2	0	0	0	0	0	0	0	0	2	4	0	0	0	2	0	2	0	0	1	0	0
Rv1795|AJW49251.1|UB21_09440|ARN06315.1|BJM02_09395|ESX-5 secretion system protein EccD5 (ESX conserved component D5) (Type VII secretion system protein EccD5) (T7SS protein EccD5)	2	0	0	0	0	0	0	0	0	0	0	2	0	0	0	0	2	2	0	0	0	0	1	0	0	0	0	0	0	0	2	0	0	2	0	0
Rv1796|AJW49252.1|UB21_09445|ARN06316.1|BJM02_09400|Mycosin-5 (EC 3.4.21.-) (MycP5 protease)	0	0	2	0	0	0	0	0	0	0	1	0	0	0	0	0	2	0	2	0	0	0	1	4	0	0	4	2	1	0	0	0	0	2	0	0
Rv1797|AJW49253.1|UB21_09450|ARN06317.1|BJM02_09405|ESX-5 secretion system protein EccE5 (ESX conserved component E5) (Type VII secretion system protein EccE5) (T7SS protein EccE5)	0	0	0	1	0	0	2	0	0	0	0	0	0	0	0	0	0	0	0	2	0	0	0	2	0	0	0	4	1	0	0	0	0	0	0	2
Rv1798|AJW49254.1|UB21_09455|ARN06318.1|BJM02_09410|ESX-5 secretion system protein EccA5 (ESX conserved component A5) (Type VII secretion system protein EccA5) (T7SS protein EccA5)	0	0	2	0	0	0	0	0	0	0	0	0	0	0	0	0	0	0	0	2	2	0	0	0	0	0	0	0	0	0	0	1	0	0	0	0
Rv1799|AJW49255.1|UB21_09460|ARN06319.1|BJM02_09415|Probable lipoprotein LppT	0	0	0	0	0	0	0	0	0	0	0	0	0	0	0	2	0	0	0	0	0	0	0	0	0	0	0	0	0	0	0	0	0	0	0	0
Rv1800|AJW49256.1|UB21_09465|ARN06320.1|BJM02_09420|Uncharacterized PPE family protein PPE28	7	3	2	2	3	3	0	0	0	2	1	0	0	1	0	0	3	4	0	0	1	1	0	0	2	2	1	1	3	2	2	1	0	0	0	0
Rv1801|AJW49257.1|UB21_09470|ARN06321.1|BJM02_09425|Uncharacterized PPE family protein PPE29	0	0	0	0	0	0	0	0	0	0	0	0	2	0	0	0	0	0	0	0	0	0	0	0	1	0	0	0	0	0	0	0	0	0	0	0
Rv1802|AJW49258.1|UB21_09475|ARN06322.1|BJM02_09430|Uncharacterized PPE family protein PPE30	0	1	0	0	0	0	0	0	0	0	0	0	0	0	0	0	0	0	0	0	0	0	0	0	0	0	0	0	0	0	0	0	0	0	0	0
Rv1804c|AJW49259.1|UB21_09485|ARN06323.1|BJM02_09440|Conserved protein	0	0	0	0	0	0	0	0	0	0	0	0	1	0	0	0	0	0	0	0	0	0	0	0	0	0	0	0	0	0	0	0	0	0	0	0
Rv1805c|AJW49260.1|UB21_09490|ARN06324.1|BJM02_09445|Uncharacterized protein	2	0	0	0	0	0	0	0	0	0	0	0	2	0	2	1	0	0	0	0	1	2	1	0	1	0	2	0	0	0	0	0	0	0	2	0
Rv1806|AJW49261.1|UB21_09495|ARN06325.1|BJM02_09450|PE family protein PE20	0	0	0	0	0	0	0	0	0	0	0	0	0	0	0	0	0	0	0	0	0	0	0	0	0	0	0	0	0	0	0	0	0	0	0	0
Rv1807|AJW49262.1|UB21_09500|ARN06326.1|BJM02_09455|PPE family protein PPE31 (Fragment)	0	1	0	0	0	0	0	0	0	0	0	0	1	0	0	0	0	0	0	0	0	2	0	0	0	0	0	0	0	2	0	0	0	0	0	0
Rv1809|AJW49263.1|UB21_09510|ARN06328.1|BJM02_09465|Uncharacterized PPE family protein PPE33	0	0	0	0	0	0	0	0	0	0	0	0	0	0	0	0	0	0	0	0	0	0	0	0	0	0	0	0	0	0	0	0	0	0	0	0
Rv1810|AJW49264.1|UB21_09515|ARN06329.1|BJM02_09470|Conserved protein	0	0	0	2	0	0	0	0	0	0	0	0	0	0	0	0	0	0	0	0	0	0	0	0	0	0	0	0	0	0	0	0	2	0	0	0
Rv1811|AJW49265.1|UB21_09520|ARN06330.1|BJM02_09475|Possible Mg2+ transport P-type ATPase C MgtC	0	0	0	0	0	0	0	0	0	0	0	0	0	0	0	0	0	0	0	0	0	0	0	0	0	0	0	0	0	0	0	0	0	0	2	0
Rv1812c|AJW49266.1|UB21_09525|ARN06331.1|BJM02_09480|NADH dehydrogenase-like protein Rv1812c (EC 1.6.-.-)	2	0	0	0	0	0	0	0	0	0	0	0	0	0	0	0	0	0	0	0	0	0	0	0	0	0	0	0	0	0	0	0	0	0	0	0
Rv1813c|AJW49267.1|UB21_09530|ARN06332.1|BJM02_09485|Uncharacterized protein Rv1813c	0	0	0	0	0	0	0	0	0	0	0	0	0	0	0	0	0	0	0	0	0	0	0	0	0	0	3	0	0	0	1	0	0	0	0	0
Rv1814|AJW49268.1|UB21_09535|ARN06333.1|BJM02_09490|C-5 sterol desaturase (EC 1.3.-.-) (Sterol-C5-desaturase)	0	0	0	0	2	0	0	0	0	0	0	0	0	0	0	0	0	0	0	0	0	0	0	0	0	0	0	0	0	0	0	0	0	0	2	0
Rv1816|AJW49269.1|UB21_09545|ARN06335.1|BJM02_09500|Uncharacterized HTH-type transcriptional regulator Rv1816	0	0	0	0	0	0	0	0	0	0	0	0	0	0	0	0	0	0	0	0	0	2	0	0	0	0	0	0	0	0	0	0	0	0	0	1
Rv1817|AJW49270.1|UB21_09550|ARN06336.1|BJM02_09505|Possible flavoprotein	0	0	0	0	0	0	0	0	0	0	0	0	0	0	0	0	0	1	0	0	0	0	0	0	0	0	2	0	0	0	0	0	0	0	0	0
Rv1819c|AJW49271.1|UB21_09560|ARN06337.1|BJM02_09515|Hydrophilic compounds import ATP-binding/permease protein BacA (EC 7.6.2.-) (Hydrophilic compounds ABC transporter BacA)	0	0	0	0	0	0	0	0	0	0	0	0	0	0	0	0	2	0	0	0	0	0	0	2	0	0	0	0	0	0	2	0	0	0	0	0
Rv1820|AJW49272.1|UB21_09565|ARN06338.1|BJM02_09520|Acetolactate synthase large subunit IlvG (ALS) (EC 2.2.1.6) (Acetohydroxy-acid synthase large subunit) (AHAS)	0	0	0	0	0	0	0	0	0	0	0	0	0	0	0	2	0	0	0	0	0	0	0	0	0	0	2	0	0	4	0	0	0	0	0	0
Rv1822|AJW49274.1|UB21_09575|ARN06340.1|BJM02_09530|Putative cardiolipin synthase (EC 2.7.8.41)	0	0	0	0	0	0	0	0	0	0	0	0	0	0	0	0	0	0	0	0	0	0	0	0	0	0	0	0	0	0	0	0	0	0	0	0
Rv1823|AJW51253.1|UB21_09580|ARN08426.1|BJM02_09535|UPF0749 protein Rv1823	0	0	0	0	0	0	0	0	0	0	0	0	0	2	0	0	0	0	0	0	0	0	0	0	0	0	0	0	0	0	0	0	0	0	0	0
Rv1824|AJW49275.1|UB21_09585|ARN06341.1|BJM02_09540|Uncharacterized protein Rv1824	0	0	0	0	0	0	0	0	0	0	0	0	0	0	0	0	0	0	0	0	0	0	0	0	0	0	0	0	0	0	0	0	2	0	0	0
Rv1825|AJW49276.1|UB21_09590|ARN06342.1|BJM02_09545|UPF0749 protein Rv1825	0	0	0	0	0	0	0	0	0	0	0	0	0	0	0	0	0	0	0	0	0	0	0	0	0	0	0	0	0	0	0	0	0	0	0	0
Rv1826|AJW49277.1|UB21_09595|ARN06343.1|BJM02_09550|Glycine cleavage system H protein	0	0	4	0	0	0	0	0	0	0	0	0	0	0	2	2	0	0	0	0	0	0	0	0	0	0	1	0	0	0	0	0	0	0	0	0
Rv1827|AJW49278.1|UB21_09600|ARN06344.1|BJM02_09555|Glycogen accumulation regulator GarA	0	0	0	0	0	0	0	0	0	0	0	0	2	0	0	0	0	0	0	0	0	0	2	0	1	0	0	2	0	0	2	0	0	0	2	0
Rv1828|AJW49279.1|UB21_09605|ARN06345.1|BJM02_09560|Uncharacterized HTH-type transcriptional regulator Rv1828	0	0	0	0	0	0	0	0	0	0	0	0	1	0	0	0	0	0	0	0	0	0	0	0	4	0	0	0	0	2	2	0	0	0	0	0
Rv1829|AJW51254.1|UB21_09610|ARN06346.1|BJM02_09565|Uncharacterized protein Rv1829	0	0	0	1	0	0	0	0	0	0	0	0	1	0	0	0	0	0	0	0	0	0	0	0	0	0	0	0	0	0	0	0	0	0	0	0
Rv1830|AJW49280.1|UB21_09615|ARN06347.1|BJM02_09570|Uncharacterized HTH-type transcriptional regulator Rv1830	0	0	0	0	0	0	0	0	0	1	0	1	0	0	0	0	0	0	0	0	0	0	0	0	2	0	0	0	0	0	0	0	0	0	0	0
Rv1831|AJW49281.1|UB21_09620|*|*|Uncharacterized protein Rv1831	0	0	0	2	0	0	0	0	0	1	0	1	0	0	0	0	0	0	0	0	0	0	0	0	0	0	0	0	1	0	0	0	0	0	0	0
Rv1832|AJW49282.1|UB21_09625|ARN06348.1|BJM02_09575|Probable glycine dehydrogenase (decarboxylating) (EC 1.4.4.2) (Glycine cleavage system P-protein) (Glycine decarboxylase) (Glycine dehydrogenase (aminomethyl-transferring))	1	0	0	0	0	0	0	0	0	0	0	2	0	0	0	2	0	0	0	0	0	2	1	0	0	0	2	0	3	2	2	0	2	2	0	0
Rv1834|AJW49283.1|UB21_09635|ARN06350.1|BJM02_09585|Putative hydrolase LipZ (EC 3.-.-.-)	0	0	0	0	0	2	0	0	0	0	0	0	1	0	0	0	0	0	0	0	0	0	0	0	0	0	0	0	0	0	2	2	0	0	0	0
Rv1835c|AJW49284.1|UB21_09640|ARN06351.1|BJM02_09590|Putative serine esterase Rv1835c (EC 3.1.1.-)	0	0	0	0	0	0	0	0	0	0	0	0	0	0	0	0	0	0	0	0	0	0	0	0	0	0	0	0	0	0	0	0	0	0	0	0
Rv1836c|AJW49285.1|UB21_09645|ARN06352.1|BJM02_09595|Uncharacterized protein Rv1836c	0	2	0	0	0	0	0	0	0	1	0	0	0	0	0	0	0	0	0	0	0	0	0	0	0	0	0	0	0	0	0	0	0	0	0	1
Rv1837c|AJW49286.1|UB21_09650|ARN06353.1|BJM02_09600|Malate synthase G (EC 2.3.3.9)	0	2	2	0	0	0	0	0	0	2	0	0	0	1	0	0	0	1	0	0	0	0	0	0	0	0	2	0	1	2	2	0	4	2	0	2
Rv1838c|AJW49287.1|UB21_09655|ARN06354.1|BJM02_09605|Ribonuclease VapC13 (RNase VapC13) (EC 3.1.-.-) (Toxin VapC13)	0	0	0	0	0	0	0	0	0	0	0	0	0	0	0	0	0	0	0	0	0	0	0	0	0	0	0	0	0	0	0	0	0	2	0	0
Rv1839c|AJW49288.1|UB21_09660|ARN06355.1|BJM02_09610|Putative antitoxin VapB13	0	0	0	0	0	0	0	0	0	0	0	0	0	0	2	0	0	0	0	0	0	0	0	0	0	0	0	0	0	0	0	0	0	0	0	0
Rv1841c|AJW49290.1|UB21_09675|ARN06357.1|BJM02_09620|Uncharacterized protein Rv1841c	0	0	0	0	0	0	0	0	0	0	0	0	0	0	0	0	0	0	0	0	0	0	0	0	0	0	0	0	0	0	0	0	0	1	1	0
Rv1842c|AJW49291.1|UB21_09680|ARN06358.1|BJM02_09625|UPF0053 protein Rv1842c	0	1	1	0	0	0	0	0	0	0	0	0	0	0	0	0	0	0	0	0	0	0	0	0	0	0	0	0	0	0	0	0	0	0	0	0
Rv1843c|AJW49292.1|UB21_09685|ARN06359.1|BJM02_09630|Uncharacterized oxidoreductase Rv1843c (EC 1.-.-.-)	0	0	0	0	0	0	0	0	0	0	0	1	0	0	0	0	0	0	0	2	0	0	2	0	3	0	2	0	0	0	0	0	0	0	0	0
Rv1844c|AJW49293.1|UB21_09690|ARN06360.1|BJM02_09635|6-phosphogluconate dehydrogenase, decarboxylating (EC 1.1.1.44)	0	0	0	0	0	0	0	0	1	0	0	0	0	0	0	2	0	0	0	0	0	0	0	0	0	0	0	0	0	0	0	0	2	0	0	0
Rv1845c|AJW49294.1|UB21_09695|ARN06361.1|BJM02_09640|Possible sensor-transducer protein BlaR	0	0	0	4	0	3	0	0	0	0	0	0	0	0	0	0	0	0	0	0	0	0	1	0	0	0	0	0	0	0	0	0	0	0	0	0
Rv1846c|AJW49295.1|UB21_09700|*|*|Transcriptional regulator BlaI	0	0	0	0	0	0	0	2	0	0	0	0	0	0	0	0	0	0	0	0	0	0	0	2	0	0	1	0	2	0	0	0	0	0	0	0
Rv1847|AJW49296.1|UB21_09705|ARN06362.1|BJM02_09650|Putative esterase Rv1847 (EC 3.1.2.-)	0	0	0	0	0	0	0	0	0	0	0	0	0	0	0	2	0	0	0	0	0	0	0	0	0	0	0	0	0	0	0	0	0	0	0	0
Rv1848|AJW49297.1|UB21_09710|ARN06363.1|BJM02_09655|Urease subunit gamma (EC 3.5.1.5) (Urea amidohydrolase subunit gamma)	0	0	0	0	0	0	0	0	0	0	0	0	0	0	0	0	0	0	0	0	0	0	0	0	0	0	0	0	0	0	0	0	0	0	0	0
Rv1849|AJW49298.1|UB21_09715|ARN06364.1|BJM02_09660|Urease subunit beta (EC 3.5.1.5) (Urea amidohydrolase subunit beta)	0	0	0	0	0	0	0	0	0	0	0	0	0	0	0	0	0	0	0	0	0	0	0	0	0	0	0	0	0	0	0	0	0	0	0	0
Rv1851|AJW49300.1|UB21_09725|ARN06366.1|BJM02_09670|Urease accessory protein UreF	0	0	0	0	0	0	0	0	0	0	0	0	0	0	0	0	0	0	0	0	0	0	0	0	0	0	0	0	0	0	0	0	0	0	0	0
Rv1852|AJW49301.1|UB21_09730|ARN06367.1|BJM02_09675|Urease accessory protein UreG	0	0	0	0	0	0	0	0	0	0	0	0	0	0	0	0	0	0	0	0	0	0	0	0	0	0	0	0	0	0	0	0	0	0	0	0
Rv1853|AJW49302.1|UB21_09735|ARN06368.1|BJM02_09680|Probable urease accessory protein UreD	0	0	0	0	0	0	0	0	0	0	0	0	0	0	0	0	0	0	0	0	0	0	0	0	0	0	0	0	0	0	0	0	0	0	0	0
Rv1854c|AJW49303.1|UB21_09740|ARN06369.1|BJM02_09685|Probable NADH dehydrogenase Ndh	0	0	0	0	0	0	0	0	0	0	0	0	6	4	4	1	0	0	0	0	2	0	2	0	0	0	0	0	2	6	0	0	2	0	0	0
Rv1855c|AJW49304.1|UB21_09745|ARN06370.1|BJM02_09690|Possible oxidoreductase	0	0	0	0	0	0	0	0	0	0	0	0	0	0	0	0	0	0	0	0	2	0	0	0	0	0	0	0	0	0	0	0	0	0	0	0
Rv1856c|AJW49305.1|UB21_09750|ARN06371.1|BJM02_09695|Putative oxidoreductase Rv1856c (EC 1.-.-.-)	0	0	0	0	0	0	0	0	0	4	2	0	0	0	0	0	0	0	0	1	0	0	0	0	0	2	0	0	0	0	0	0	0	0	0	2
Rv1857|AJW49306.1|UB21_09755|ARN06372.1|BJM02_09700|Molybdate-binding protein ModA (Molybdate/tungstate-binding protein ModA)	0	0	0	0	0	0	0	0	0	0	0	0	0	0	0	0	0	0	0	0	0	2	0	0	0	0	2	0	0	0	0	0	0	1	0	0
Rv1858|AJW49307.1|UB21_09760|ARN06373.1|BJM02_09705|Molybdenum transport system permease protein ModB	1	0	0	0	0	0	0	0	0	0	0	0	0	0	0	0	0	0	0	0	0	1	0	0	0	0	0	0	0	0	0	0	0	1	0	0
Rv1859|AJW49308.1|UB21_09765|ARN06374.1|BJM02_09710|Molybdenum import ATP-binding protein ModC (EC 7.3.2.5)	1	4	3	5	1	0	1	0	1	6	3	4	2	0	0	1	0	0	0	1	0	3	3	0	1	1	1	2	0	0	0	1	2	1	0	2
Rv1860|AJW49309.1|UB21_09770|ARN06375.1|BJM02_09715|Alanine and proline-rich secreted protein Apa (45 kDa glycoprotein) (45/47 kDa antigen) (Antigen MPT-32) (FAP-B) (Fibronectin attachment protein) (Immunogenic protein MPT32)	0	0	0	0	0	0	0	0	0	0	0	0	0	0	0	0	0	0	0	0	0	0	0	0	0	0	0	0	0	0	0	0	0	0	0	0
Rv1861|AJW49310.1|UB21_09775|ARN06376.1|BJM02_09720|Probable conserved transmembrane protein	0	0	0	0	0	0	0	0	0	0	0	0	0	0	0	0	0	0	0	0	0	0	0	0	2	0	0	0	0	0	0	0	0	0	0	0
Rv1862|AJW49311.1|UB21_09780|ARN06377.1|BJM02_09725|Probable alcohol dehydrogenase AdhA (EC 1.1.1.1)	0	0	0	0	0	0	0	0	0	0	0	0	0	0	0	0	0	0	0	0	0	0	0	2	0	0	0	0	0	0	0	0	0	0	0	0
Rv1863c|AJW49312.1|UB21_09785|ARN06378.1|BJM02_09730|Probable conserved integral membrane protein	0	0	2	0	0	0	0	0	0	0	0	0	0	0	2	2	0	0	0	0	0	0	0	2	0	0	0	0	0	0	0	0	0	0	0	0
Rv1864c|AJW49313.1|UB21_09790|ARN06379.1|BJM02_09735|Conserved protein	0	0	0	0	0	0	0	0	0	0	2	0	0	0	0	0	0	0	0	0	0	0	0	0	0	0	0	0	0	0	0	0	0	0	0	0
Rv1865c|AJW49314.1|UB21_09795|ARN06380.1|BJM02_09740|Probable short-chain type dehydrogenase	0	0	0	0	0	0	0	0	0	0	0	0	0	0	0	0	0	0	0	0	0	0	0	0	0	0	0	0	0	0	0	0	0	0	0	0
Rv1867|AJW49315.1|UB21_09805|ARN06382.1|BJM02_09750|Conserved protein	0	0	0	0	0	0	0	0	0	0	0	1	0	0	1	0	0	0	0	0	0	0	0	0	0	0	0	0	0	0	0	0	0	0	0	0
Rv1868|AJW49316.1|UB21_09810|ARN06383.1|BJM02_09755|Uncharacterized protein	0	0	0	0	0	0	0	2	0	0	0	0	0	0	0	0	0	0	0	0	0	0	0	0	0	0	0	0	0	0	0	0	0	0	0	0
Rv1869c|AJW49317.1|UB21_09815|ARN06384.1|BJM02_09760|Probable reductase	0	2	0	0	0	0	0	0	0	0	0	0	0	0	0	0	0	0	0	0	0	0	2	0	0	0	0	0	0	0	0	0	0	0	2	0
Rv1870c|AJW51255.1|UB21_09820|ARN06385.1|BJM02_09765|Uncharacterized protein	0	0	0	0	0	1	0	0	0	0	0	0	0	0	0	0	0	0	0	0	0	1	0	0	0	0	0	0	0	0	0	0	0	0	0	0
Rv1871c|AJW49318.1|UB21_09825|ARN06386.1|BJM02_09770|Conserved protein	0	1	0	4	0	0	0	0	0	0	0	2	0	0	0	0	2	0	2	0	0	0	0	2	0	0	2	0	0	0	0	0	4	0	0	0
Rv1872c|AJW49319.1|UB21_09830|ARN06387.1|BJM02_09775|Putative L-lactate dehydrogenase (EC 1.1.-.-)	0	3	0	2	0	0	0	2	0	0	5	0	1	2	5	2	2	2	0	0	0	4	2	2	0	0	2	2	2	4	2	0	0	0	2	4
Rv1873|AJW49320.1|UB21_09835|ARN06388.1|BJM02_09780|Uncharacterized protein	0	0	0	0	0	0	0	0	0	0	1	0	0	0	0	0	0	1	0	0	0	0	0	0	0	0	0	0	2	0	0	0	0	0	0	0
Rv1874|AJW49321.1|UB21_09840|ARN06389.1|BJM02_09785|EthD domain-containing protein	0	0	0	0	0	0	0	0	0	0	0	0	0	0	0	0	0	0	0	0	0	0	0	0	0	0	0	0	0	0	0	0	0	0	0	0
Rv1875|AJW49322.1|UB21_09845|ARN06390.1|BJM02_09790|Conserved protein	0	0	0	0	0	0	0	0	0	0	0	0	0	0	0	0	0	0	0	0	0	0	0	0	0	2	0	0	0	0	2	0	0	0	0	0
Rv1876|AJW51256.1|UB21_09850|ARN08427.1|BJM02_09795|Bacterioferritin (BFR) (EC 1.16.3.1)	2	0	0	0	0	0	0	0	0	0	0	0	0	0	0	0	0	0	0	0	0	0	0	0	0	0	0	0	0	0	0	0	0	0	0	0
Rv1877|AJW49323.1|UB21_09855|ARN06391.1|BJM02_09800|Uncharacterized MFS-type transporter Rv1877	0	0	0	0	0	0	0	0	0	0	0	0	0	0	0	0	2	0	0	0	0	0	0	0	0	2	0	0	0	0	0	0	0	0	0	0
Rv1878|AJW49324.1|UB21_09860|ARN06392.1|BJM02_09805|Probable glutamine synthetase GlnA3 (Glutamine synthase) (GS-I)	0	0	0	0	0	0	0	0	0	0	0	0	0	0	0	0	0	0	0	0	0	0	0	0	0	0	0	0	0	0	0	0	0	0	0	0
Rv1879|AJW49325.1|UB21_09865|ARN06393.1|BJM02_09810|Amidohydro-rel domain-containing protein	0	0	0	0	0	0	0	0	0	0	0	2	0	2	1	0	0	0	0	0	2	0	0	0	0	0	0	0	0	0	0	0	0	0	0	0
Rv1881c|AJW51257.1|UB21_09875|ARN06394.1|BJM02_09820|Probable lipoprotein LppE	0	0	0	0	0	0	0	0	0	0	0	0	0	0	0	0	0	0	0	0	0	0	0	0	0	0	0	0	0	0	0	0	0	0	0	0
Rv1882c|AJW49326.1|UB21_09880|ARN06395.1|BJM02_09825|Probable short-chain type dehydrogenase/reductase	0	0	0	0	0	0	0	0	0	0	0	0	0	0	0	0	0	0	0	0	0	0	2	0	0	0	0	0	0	0	0	0	0	0	0	0
Rv1884c|AJW49327.1|UB21_09890|ARN06397.1|BJM02_09835|Resuscitation-promoting factor RpfC (EC 3.-.-.-)	0	0	0	0	0	0	0	0	0	0	0	0	2	0	0	0	0	0	0	0	0	0	0	0	0	0	0	0	0	0	0	0	0	0	0	0
Rv1885c|AJW49328.1|UB21_09895|ARN06398.1|BJM02_09840|Secreted chorismate mutase (*MtCM) (CM) (EC 5.4.99.5)	0	0	0	0	0	0	0	0	0	0	0	0	0	0	0	0	0	0	0	0	0	0	0	2	0	0	0	0	0	0	0	2	0	0	0	0
Rv1886c|AJW49329.1|UB21_09900|ARN06399.1|BJM02_09845|Diacylglycerol acyltransferase/mycolyltransferase Ag85B (DGAT) (EC 2.3.1.122) (EC 2.3.1.20) (30 kDa extracellular protein) (Acyl-CoA:diacylglycerol acyltransferase) (Antigen 85 complex B) (85B) (Ag85B) (Extracellular alpha-antigen) (Fibronectin-binding protein B) (Fbps B)	2	0	0	0	0	0	0	0	0	0	0	0	0	0	2	0	0	2	0	0	0	0	2	0	0	0	0	0	0	0	0	0	0	0	0	0
Rv1887|AJW49330.1|UB21_09905|ARN06400.1|BJM02_09850|Uncharacterized protein	0	0	0	0	0	0	0	0	0	0	2	0	2	2	1	0	0	1	0	0	2	0	0	0	0	0	0	2	2	0	0	2	0	2	0	0
Rv1890c|AJW49331.1|UB21_09920|ARN06402.1|BJM02_09865|YceI domain-containing protein	0	0	0	0	0	0	0	0	0	0	0	0	0	0	0	0	0	0	0	0	0	0	0	0	0	0	0	0	0	0	0	0	0	0	0	0
Rv1891|AJW51258.1|UB21_09925|ARN08429.1|BJM02_09870|Conserved protein	0	0	0	0	0	0	0	0	0	0	0	0	0	0	2	0	0	0	0	0	0	0	0	0	0	0	0	0	0	2	0	0	0	0	0	0
Rv1892|AJW51259.1|UB21_09930|ARN06403.1|BJM02_09875|Probable membrane protein	0	0	0	0	0	0	0	0	0	0	0	0	0	0	0	0	0	0	0	0	0	0	0	0	0	0	0	0	0	0	0	0	0	0	0	0
Rv1893|AJW49332.1|UB21_09935|ARN06404.1|BJM02_09880|Uncharacterized protein	0	0	0	0	0	0	0	0	0	0	0	0	0	0	0	0	0	0	0	0	0	0	0	0	0	0	0	0	1	0	0	0	0	0	0	0
Rv1894c|AJW49333.1|UB21_09940|ARN06405.1|BJM02_09885|NMO domain-containing protein	0	0	0	0	0	0	0	0	0	2	0	0	0	0	0	0	0	0	0	0	0	0	0	0	0	0	0	0	0	0	0	0	0	0	0	0
Rv1896c|AJW49334.1|UB21_09950|ARN06406.1|BJM02_09895|Putative S-adenosyl-L-methionine-dependent methyltransferase Rv1896c (EC 2.1.1.-)	0	0	0	0	2	0	0	0	0	0	0	0	0	0	0	0	0	0	0	0	0	0	0	0	0	0	2	0	0	0	0	0	0	0	0	0
Rv1897c|AJW49335.1|UB21_09955|ARN06407.1|BJM02_09900|D-aminoacyl-tRNA deacylase (DTD) (EC 3.1.1.96) (Gly-tRNA(Ala) deacylase)	0	0	0	0	0	0	0	0	0	0	0	0	0	0	0	0	0	0	0	0	0	0	0	0	0	0	0	0	0	0	0	0	0	0	0	0
Rv1898|AJW49336.1|UB21_09960|ARN06408.1|BJM02_09905|UPF0045 protein Rv1898	6	4	5	6	1	2	1	0	0	0	1	0	1	1	1	0	3	5	2	5	0	2	0	0	1	3	2	1	3	0	0	1	0	0	1	0
Rv1900c|AJW49337.1|UB21_09970|ARN06409.1|BJM02_09915|Probable lignin peroxidase LipJ	0	0	0	0	0	0	0	0	0	0	0	0	2	0	0	0	0	0	0	0	0	0	0	0	0	0	0	0	0	0	0	0	0	0	0	0
[truncated: 1,901 more rows]

## Sheet: CP017596_counts (BC-391)
SUPPLEMENTARY TABLE 1
Gene_id	391D3R1.1	391D3R1.2	391D3R1.3	391D3R1.4	391D3R6.1	391D3R6.2	391D3R6.3	391D3R6.4	391D3R7.1	391D3R7.2	391D3R7.3	391D3R7.4	#REF!	391D14R5.2	391D14R5.3	391D14R5.4	391D14R7.1	391D14R7.2	391D14R7.3	391D14R7.4	391D14R8.1	391D14R8.2	391D14R8.3	391D14R8.4	391D28R1.1	391D28R1.2	391D28R1.3	391D28R1.4	391D28R2.1	391D28R2.2	391D28R2.3	391D28R2.4	391D28R3.1	391D28R3.2	391D28R3.3	391D28R3.4	391D60R1.1	391D60R1.2	391D60R1.3	391D60R1.4	391D60R2.1	391D60R2.2	391D60R2.3	391D60R2.4	391D60R3.1	391D60R3.2	391D60R3.3	391D60R3.4
Rv0236c|AJW51076.1|UB21_01255|ARN08239.1|BJM02_01240|Alpha-(1->3)-arabinofuranosyltransferase (EC 2.4.2.47) (Arabinofuranan 3-O-arabinosyltransferase)	6885	6366	7213	7059	2253	2072	2334	2123	12783	12876	14623	13068	710	672	783	739	1331	1346	1451	1468	958	818	1007	957	12890	13145	14941	13380	27919	28224	32132	28959	24152	24565	27592	23987	38892	36159	40498	39134	29216	29442	33290	29538	11987	11993	13877	12109
Rv0509|AJW48152.1|UB21_02670|ARN05189.1|BJM02_02645|Glutamyl-tRNA reductase (GluTR) (EC 1.2.1.70)	56473	48020	53124	54386	22659	19269	21725	21917	21028	19915	22733	20596	119238	113996	129717	118523	38899	33835	37708	38656	37424	30991	35131	35887	26655	25365	28816	26292	34747	33220	38471	34371	30818	29406	33431	29942	30813	25428	28775	29294	38687	36541	41797	38378	7604	7213	8406	7299
Rv3729|AJW50880.1|UB21_19790|ARN08037.1|BJM02_19740|Possible transferase	340	278	311	361	83	92	58	72	469	462	505	477	68	69	79	53	66	72	79	70	42	38	44	44	525	529	653	556	1037	1079	1121	1056	895	906	988	894	1259	1133	1259	1272	1133	1173	1303	1284	426	398	455	444
Rv0867c|AJW48471.1|UB21_04600|*|BJM02_04570|Resuscitation-promoting factor RpfA (EC 3.-.-.-)	272	214	240	227	5288	5010	5745	5603	310	282	376	306	300	315	409	365	3218	3259	3563	3631	6492	5894	6682	6577	176	135	154	167	163	189	230	199	297	263	303	246	257	257	249	283	225	194	228	169	312	290	330	345
Rv2953|AJW50216.1|UB21_15605|ARN07353.1|BJM02_15550|Trans-acting enoyl reductase (EC 1.3.1.-)	19	29	24	14	87	82	87	70	576	431	562	406	6	9	6	1	32	20	31	33	34	33	31	33	181	155	151	129	319	236	245	223	357	271	266	280	173	154	159	180	196	166	158	135	385	302	380	333
Rv2961|AJW50220.1|UB21_15650|ARN07359.1|BJM02_15595|Probable transposase	14	12	26	20	69	75	86	78	42	58	58	48	0	0	0	2	26	13	21	35	54	57	58	42	53	54	52	57	124	90	120	95	126	141	143	144	139	152	160	140	158	124	183	139	56	58	54	60
UB21_20845_RNAse_P_RNA	54	54	62	50	6	15	2	12	0	6	2	0	29	26	26	34	48	42	48	44	82	70	90	70	20	26	28	26	0	2	2	0	37	33	60	35	160	140	140	112	176	150	143	120	42	66	42	62
*|*|*|3548|BJM02_17955 |PE family protein	21	25	21	20	11	9	7	15	25	28	48	23	6	8	7	4	13	7	11	13	3	8	11	5	56	64	57	51	61	62	47	65	75	75	89	72	123	98	136	143	84	84	77	81	48	54	83	51
Rv1993c|AJW49431.1|UB21_10520|ARN06504.1|BJM02_10465|Uncharacterized protein Rv1993c	4	2	6	9	7	7	5	2	10	9	24	10	2	3	1	4	6	3	2	5	3	8	4	2	30	33	36	39	67	70	63	69	88	68	67	55	109	103	105	121	100	108	103	114	30	34	43	25
Rv0823c|AJW51130.1|UB21_04350|ARN08296.1|BJM02_04320|Probable tRNA-dihydrouridine synthase (EC 1.3.1.-)	42	36	38	42	3	2	4	1	57	36	40	40	0	1	3	0	1	1	0	0	1	0	2	1	42	35	34	32	75	73	68	72	80	75	66	58	80	78	87	101	94	81	78	68	44	35	26	26
Rv0791c|AJW48409.1|UB21_04180|ARN05450.1|BJM02_04155|Conserved protein	5	8	7	8	1	5	3	3	28	27	32	26	1	0	0	0	0	0	0	0	1	1	1	0	32	36	30	30	81	64	69	51	80	73	68	60	86	80	60	70	93	79	74	62	40	43	30	27
*|*|*|1523|BJM02_07725 |hypothetical protein	30	19	31	24	5071	4603	5132	5116	199	165	222	188	19	14	17	14	1684	1524	1742	1760	2470	2184	2488	2364	35	21	33	19	40	42	46	45	23	24	37	28	100	90	110	110	33	36	29	44	43	36	53	47
Rv2582|*|*|ARN07033.1|BJM02_13660|Probable peptidyl-prolyl cis-trans isomerase B (PPIase B) (EC 5.2.1.8) (Rotamase B)	19	11	7	15	9	6	9	8	24	24	36	20	6	5	6	6	9	4	10	10	5	6	6	6	32	38	40	35	51	50	58	57	71	47	66	50	80	67	95	99	66	44	44	58	52	33	46	42
RVnc0036a_MTS2823	18	10	14	16	2	0	2	4	0	0	10	4	22	16	24	18	26	26	28	38	38	43	40	22	8	10	6	2	0	2	6	0	10	18	18	12	54	48	44	82	68	60	80	100	24	20	26	32
*|*|*|289|BJM02_01460 |hypothetical protein	10	17	17	14	258	339	371	354	17	16	33	33	5	4	0	5	117	136	146	135	179	207	210	213	29	20	35	30	29	42	47	47	46	49	45	41	60	49	39	47	74	71	95	80	31	22	37	30
Rv1215c|AJW48765.1|UB21_06490|ARN05816.1|BJM02_06465|Conserved protein	16	27	20	17	19	15	17	8	46	46	56	46	8	6	6	11	12	7	8	8	9	6	2	6	30	23	31	23	50	46	54	55	43	45	53	45	55	33	63	50	51	57	72	56	28	30	29	26
Rv3448|AJW50644.1|UB21_18315|ARN07798.1|BJM02_18285|ESX-4 secretion system protein eccD4 (ESX conserved component D4) (Type VII secretion system protein eccD4) (T7SS protein eccD4)	50	48	41	29	10119	8632	9957	9842	104	114	142	116	52	56	55	47	5832	5014	6201	5808	7720	6410	7495	7362	25	21	22	21	40	42	36	36	16	21	21	25	83	64	73	75	32	18	35	27	15	20	41	20
*|*|*|2602|BJM02_13170 |hypothetical protein	17	27	19	22	7	15	7	8	18	16	17	9	5	3	7	6	6	7	2	10	3	4	10	10	27	17	18	24	43	38	35	41	41	47	38	44	57	42	47	58	51	48	58	53	26	20	15	25
*|*|*|773|BJM02_03905 |hypothetical protein	12	15	7	13	7	7	11	6	14	15	12	17	1	1	1	1	3	3	7	2	10	9	2	10	24	24	21	20	25	33	32	24	24	36	40	35	30	31	47	37	55	59	49	47	18	21	31	22
Rv2311|AJW49690.1|UB21_12235|ARN06790.1|BJM02_12190|Uncharacterized protein Rv2311	4	8	5	9	1	3	2	0	18	19	12	10	1	1	1	0	1	1	1	1	2	2	1	1	25	20	10	17	49	42	28	42	56	45	30	44	43	44	32	36	65	60	28	49	35	25	11	19
*|*|*|1525|BJM02_07735 |PE family protein	13	9	15	5	1677	1592	1607	1716	98	101	91	88	6	3	5	6	648	562	586	623	828	732	848	879	17	10	17	17	20	21	26	30	23	16	15	20	36	42	45	48	33	21	18	23	25	19	16	21
*|*|*|ARN07865.1|BJM02_18720 |hypothetical protein	2	2	2	5	92	82	120	114	15	18	28	17	0	0	0	0	34	38	44	33	44	25	53	35	19	2	10	10	22	22	22	20	12	29	20	26	30	41	38	37	33	25	28	45	15	16	11	16
Rv1333|AJW48869.1|UB21_07135|ARN05923.1|BJM02_07100|Uncharacterized aminopeptidase Rv1333 (EC 3.4.11.-)	13	7	16	11	0	3	0	0	32	28	9	9	1	2	0	0	0	2	1	0	2	0	0	0	19	18	11	7	42	23	22	19	47	33	16	22	27	30	19	16	52	37	27	27	19	14	12	12
*|*|*|ARN06020.1|BJM02_07670 |hypothetical protein	11	5	12	10	2	2	4	1	6	6	5	15	2	0	1	0	2	2	3	2	0	0	2	1	11	10	12	11	7	13	10	21	14	14	28	19	36	28	33	24	32	19	35	39	6	5	13	6
Rv1692|AJW49171.1|UB21_08940|ARN06229.1|BJM02_08895|D,L-glycerol 3-phosphate phosphatase (G3P phosphatase) (EC 3.1.3.21)	0	1	0	0	0	0	1	0	1	1	1	0	1	0	0	0	0	0	0	1	0	0	0	0	0	0	0	0	0	0	0	0	0	0	1	0	0	0	0	0	0	0	0	0	67	61	62	58
Rv1046c|AJW48621.1|UB21_05575|ARN05667.1|BJM02_05540|Uncharacterized protein	18	9	13	9	0	1	0	0	21	10	11	6	1	1	1	0	0	0	0	0	1	0	0	0	15	16	10	9	22	18	17	13	29	16	17	10	23	23	22	23	47	15	24	25	9	6	14	8
Rv0649|AJW51115.1|UB21_03420|ARN08281.1|BJM02_03395|Possible malonyl CoA-acyl carrier protein transacylase FabD2 (MCT)	28	26	47	27	10	13	23	11	10	11	19	10	17	12	16	11	13	8	11	4	4	5	3	10	9	15	8	10	15	16	20	19	23	8	17	12	25	17	22	23	28	16	31	26	8	10	6	8
Rv1661|*|*|ARN06204.1|BJM02_08745|Probable polyketide synthase Pks7	12	15	7	5	9	18	16	13	15	15	9	4	1	1	1	0	1	9	4	6	6	7	12	6	13	7	11	2	24	19	12	14	17	19	18	16	17	22	24	14	26	38	18	17	13	14	4	8
Rv1898|AJW49336.1|UB21_09960|ARN06408.1|BJM02_09905|UPF0045 protein Rv1898	7	10	12	13	0	1	0	0	8	19	8	6	0	0	1	0	1	0	0	1	0	0	2	0	11	8	10	6	14	12	23	17	13	14	16	15	21	21	33	29	11	17	27	14	11	7	8	6
Rv2370c|AJW49741.1|UB21_12555|ARN06843.1|BJM02_12515|Uncharacterized protein	2	0	6	2	0	2	1	1	23	8	13	14	2	0	0	2	2	1	1	0	1	0	2	2	8	8	3	9	20	19	14	13	19	15	30	14	21	24	17	12	13	30	23	17	16	11	9	10
Rv0182c|AJW51067.1|UB21_00975|ARN08232.1|BJM02_00960|ECF RNA polymerase sigma factor SigG (ECF sigma factor SigG) (Alternative RNA polymerase sigma factor SigG) (RNA polymerase sigma-G factor) (Sigma-g factor)	6	3	0	0	3	5	0	0	16	12	2	4	0	0	2	0	3	0	0	0	0	1	0	0	22	10	7	6	30	29	10	9	29	26	10	9	25	29	7	7	34	30	18	16	13	15	2	5
Rv3427c|AJW50624.1|UB21_18185|ARN07776.1|BJM02_18155|Putative ATP-binding protein Rv3427c in insertion sequence	14	11	16	8	3	3	2	4	18	12	13	16	10	14	3	8	11	12	14	10	7	12	7	10	11	18	21	10	21	11	18	17	10	18	19	19	24	24	23	21	14	16	19	13	12	12	14	9
Rv0107c|AJW47810.1|UB21_00575|ARN04839.1|BJM02_00575|Probable cation-transporting ATPase I (EC 7.2.2.-)	1	3	2	3	1	2	0	3	10	8	8	6	4	1	6	0	5	8	5	8	7	3	4	3	10	4	5	3	13	11	13	7	16	5	11	13	18	25	30	24	13	20	13	11	14	12	9	9
Rv1020|AJW48594.1|UB21_05425|ARN05639.1|BJM02_05390|Transcription-repair-coupling factor (TRCF) (EC 3.6.4.-)	3	2	0	2	1	0	1	0	7	15	6	8	1	0	1	2	1	0	1	1	1	0	0	0	14	11	6	3	25	26	20	19	22	20	15	7	22	18	13	16	24	30	7	14	8	16	9	6
Rv1243c|*|*|ARN05838.1|BJM02_06605|PE-PGRS family protein PE_PGRS23	3	2	1	2	31	30	32	38	34	26	23	18	2	2	0	0	11	13	9	11	16	25	13	10	5	5	6	8	21	9	17	10	16	12	22	14	12	16	20	24	21	9	7	12	15	13	20	14
Rv2539c|AJW49884.1|UB21_13495|ARN06997.1|BJM02_13445|Shikimate kinase (SK) (EC 2.7.1.71)	2	6	8	5	1	1	2	2	9	12	7	9	3	2	5	1	5	4	6	2	4	5	3	2	6	6	4	5	10	4	11	3	14	5	20	12	22	24	25	31	5	13	12	12	11	8	6	5
*|*|*|ARN07917.1|BJM02_19010 |PE family protein	7	8	6	11	248	309	307	294	6	3	11	5	0	0	0	0	80	103	119	104	65	120	117	105	3	4	7	6	13	8	7	6	11	9	11	9	25	37	24	26	7	7	8	9	5	3	8	8
*|*|*|1878|BJM02_09510 |hypothetical protein	4	2	2	4	4	7	3	4	15	12	16	8	0	0	0	0	1	2	6	4	7	4	1	5	6	6	6	6	15	19	11	14	15	11	18	17	11	24	17	17	12	12	11	19	5	9	11	7
Rv1800|AJW49256.1|UB21_09465|ARN06320.1|BJM02_09420|Uncharacterized PPE family protein PPE28	6	2	2	1	2	0	0	1	10	16	2	8	0	1	0	0	0	0	0	0	1	0	0	0	16	12	5	2	27	29	11	8	20	28	10	11	16	23	7	10	23	29	7	11	12	8	4	3
Rv2378c|AJW49749.1|UB21_12595|ARN06851.1|BJM02_12555|L-lysine N6-monooxygenase MbtG (EC 1.14.13.59) (Lysine 6-N-hydroxylase) (Lysine N6-hydroxylase) (Lysine-N-oxygenase) (Mycobactin synthase protein G)	10	18	2	4	2	0	0	0	18	4	6	4	1	0	0	0	0	1	0	0	0	1	0	0	24	16	10	4	18	22	4	10	26	23	7	6	15	20	9	9	23	24	10	9	15	5	7	3
Rv1676|AJW49158.1|UB21_08860|ARN06216.1|BJM02_08815|AhpC-TSA domain-containing protein	2	1	0	0	0	0	1	1	9	4	5	3	0	0	0	1	0	0	0	3	0	0	1	0	8	8	8	5	21	7	13	2	12	14	16	12	15	10	22	13	17	18	17	9	13	4	4	3
*|*|*|3671|BJM02_18570 |PE-PGRS family protein	1	5	1	1	155	192	195	222	6	3	1	11	2	0	0	0	56	75	79	86	46	70	62	64	0	3	2	2	3	2	4	5	6	4	5	14	22	22	25	17	3	1	4	4	10	9	18	9
Rv0273c|AJW47944.1|UB21_01445|ARN04978.1|BJM02_01430|Possible transcriptional regulatory protein	1	0	0	1	0	1	0	1	4	4	3	8	1	0	0	0	1	1	0	0	0	0	2	0	4	6	3	2	12	12	15	10	11	11	10	12	20	17	13	19	10	11	12	9	6	8	5	9
Rv1244|AJW51196.1|UB21_06640|ARN08366.1|BJM02_06610|Probable lipoprotein LpqZ	3	1	2	0	2	0	0	0	11	6	2	5	1	1	0	0	0	1	0	0	1	0	0	0	16	17	4	4	42	17	12	17	21	18	8	10	10	5	7	2	33	25	9	9	16	12	5	1
Rv3545c|AJW50720.1|UB21_18830|ARN07875.1|BJM02_18780|Steroid C26-monooxygenase (EC 1.14.15.29) (Cholest-4-en-3-one 26-monooxygenase) (Cholest-4-en-3-one C26-monooxygenase [(25S)-3-oxocholest-4-en-26-oate forming]) (Cholesterol C26-monooxygenase) (Cholesterol C26-monooxygenase [(25S)-3beta-hydroxycholest-5-en-26-oate forming]) (Cytochrome P450 125) (Steroid C27-monooxygenase)	3	4	0	2	7	6	10	9	16	10	5	10	0	0	0	0	2	7	3	3	6	7	3	3	3	7	7	7	15	12	6	17	11	13	16	14	12	20	17	17	7	13	8	11	3	8	7	10
Rv0175|AJW47858.1|UB21_00940|ARN04891.1|BJM02_00925|Probable conserved Mce associated membrane protein	2	5	9	6	1	0	0	0	8	9	3	3	1	0	4	2	0	0	1	0	0	0	0	0	9	7	2	5	12	15	6	7	19	14	7	10	5	11	18	8	23	13	11	17	12	5	4	3
Rv3820c|AJW50956.1|UB21_20285|ARN08115.1|BJM02_20235|Trehalose-2-sulfate acyltransferase PapA2 (EC 2.3.1.288) (2-O-sulfo trehalose long-chain-acyltransferase) (Polyketide synthase-associated protein A2)	11	4	9	10	4	0	5	2	18	11	14	11	12	10	11	12	7	4	6	8	3	3	3	4	17	8	11	6	20	8	21	13	19	8	16	6	15	9	8	6	29	16	14	9	8	1	4	4
Rv1280c|AJW48819.1|UB21_06820|ARN05870.1|BJM02_06790|Uncharacterized protein Rv1280c	3	5	0	1	0	2	0	0	9	8	8	1	0	0	0	0	0	0	0	1	1	0	1	0	10	6	2	2	27	11	12	5	23	14	11	14	10	10	8	14	17	16	13	8	12	3	2	6
Rv2159c|AJW49574.1|UB21_11435|ARN06656.1|BJM02_11380|Conserved protein	2	3	1	0	2	5	2	1	32	32	5	9	1	1	0	0	1	2	0	0	4	2	0	3	16	6	4	3	12	18	7	4	18	10	10	4	5	7	1	0	19	14	2	2	23	20	10	4
Rv2020c|AJW49452.1|UB21_10675|ARN06529.1|BJM02_10615|Type_ISP_C domain-containing protein	0	2	0	3	0	0	1	1	4	3	1	2	0	0	0	0	0	0	0	1	1	0	0	0	2	4	5	4	13	5	7	12	6	7	8	14	13	11	10	10	15	5	10	7	4	4	4	7
Rv2380c|AJW49750.1|UB21_12605|ARN06853.1|BJM02_12565|Mycobactin synthetase protein B (Phenyloxazoline synthase MbtB)	1	2	1	0	0	0	1	0	5	4	1	4	0	1	0	0	1	0	0	1	0	1	0	0	4	8	1	2	15	9	6	1	10	11	9	2	10	12	2	6	15	14	13	8	2	10	3	3
Rv0648|AJW48273.1|UB21_03415|ARN05313.1|BJM02_03390|Alpha-mannosidase	1	1	1	4	3	3	2	1	5	1	4	2	0	1	0	0	3	1	0	0	0	1	3	1	7	6	6	1	13	10	7	12	12	13	11	12	5	6	10	11	15	6	8	12	10	4	5	5
Rv0467|AJW48117.1|UB21_02440|ARN05151.1|BJM02_02415|Isocitrate lyase (ICL) (EC 4.1.3.1) (Isocitrase) (Isocitratase)	0	2	0	4	0	0	2	0	0	0	0	0	2	2	0	2	0	2	0	2	0	0	0	0	2	0	0	4	4	2	4	6	10	4	6	6	13	13	20	12	8	2	6	4	4	2	4	6
Rv0457c|AJW48107.1|UB21_02390|ARN05142.1|BJM02_02365|Probable peptidase	2	2	0	0	9	4	7	8	13	17	14	21	0	0	0	0	0	2	0	0	3	2	0	5	3	11	6	1	2	5	7	6	5	9	5	8	5	3	11	8	10	5	8	5	8	12	5	11
*|*|*|595|BJM02_03000 |PE family protein	0	1	0	2	25	31	24	39	6	5	5	6	0	0	0	0	8	13	3	7	11	14	13	18	2	5	2	3	9	10	8	13	13	8	15	8	12	6	3	5	9	9	3	6	8	7	4	8
Rv2396|*|*|*|BJM02_12660|PE-PGRS family protein PE_PGRS41	3	6	7	3	443	401	447	404	12	19	18	15	7	4	9	5	356	310	325	355	436	391	430	414	3	2	7	6	6	1	2	6	4	0	1	2	19	6	10	10	10	5	6	1	2	3	6	2
*|*|*|1143|BJM02_05800 |PE family protein	3	5	6	5	19	6	9	14	2	2	1	4	1	0	1	0	2	4	4	5	7	3	9	12	5	2	5	4	6	6	4	5	5	3	4	8	8	8	12	4	14	7	4	4	4	0	3	4
Rv2931|*|*|*|BJM02_15445|Phenolphthiocerol/phthiocerol polyketide synthase subunit A (EC 2.3.1.292) ((Phenol)carboxyphthiodiolenone synthase subunit A) (Beta-ketoacyl-acyl-carrier-protein synthase I) (Phthiocerol synthesis polyketide synthase type I PpsA)	1	0	1	0	2	2	0	0	4	8	5	4	2	1	4	0	0	0	0	0	1	2	0	0	1	4	8	0	8	7	8	8	5	6	9	2	3	7	5	0	4	7	15	5	4	4	10	7
Rv2935|AJW50203.1|UB21_15520|ARN08556.1|BJM02_15465|Phenolphthiocerol/phthiocerol polyketide synthase subunit E (EC 2.3.1.292) ((Phenol)carboxyphthiodiolenone synthase subunit E) (Beta-ketoacyl-acyl-carrier-protein synthase I) (Phthiocerol synthesis polyketide synthase type I PpsE)	1	1	2	1	0	2	4	2	7	3	11	9	0	0	3	3	3	2	1	1	1	0	1	2	6	1	2	2	6	4	4	4	3	6	8	8	4	7	6	6	4	10	9	8	3	3	5	5
Rv2124c|AJW49544.1|UB21_11240|ARN06624.1|BJM02_11185|Methionine synthase (EC 2.1.1.13) (5-methyltetrahydrofolate--homocysteine methyltransferase) (Methionine synthase, vitamin-B12 dependent) (MS)	21	17	23	11	2	4	3	1	10	8	9	5	12	13	11	11	2	4	6	3	8	1	4	7	5	11	2	3	18	6	13	14	7	8	10	10	2	4	7	6	13	3	7	5	6	5	8	3
Rv3792|AJW50934.1|UB21_20140|ARN08092.1|BJM02_20090|Galactan 5-O-arabinofuranosyltransferase (EC 2.4.2.46) (Arabinofuranosyltransferase AftA)	1	0	1	1	1	0	1	1	5	4	3	2	0	0	0	1	0	0	0	0	2	1	1	0	4	2	4	4	6	6	7	6	4	8	4	4	10	7	8	9	6	7	6	5	1	4	1	3
Rv0384c|*|*|ARN08247.1|BJM02_01990|Chaperone protein ClpB	4	2	7	5	2	1	2	3	4	10	7	5	2	0	2	6	0	1	3	0	5	1	0	6	5	1	1	1	4	4	3	3	10	6	2	10	15	5	7	9	7	2	6	2	2	4	2	3
Rv2030c|AJW51278.1|UB21_10740|ARN08445.1|BJM02_10680|Uncharacterized protein Rv2030c	0	0	0	0	0	0	0	0	0	0	4	4	0	0	0	0	0	0	0	0	0	0	0	0	3	0	2	2	2	2	2	2	2	0	8	3	8	5	6	9	5	6	4	7	10	2	0	2
Rv3332|AJW50553.1|UB21_17685|ARN07700.1|BJM02_17655|Probable N-acetylglucosamine-6-phosphate deacetylase NagA (GlcNAc 6-P deacetylase)	2	8	3	3	0	0	2	0	5	2	2	3	0	1	0	0	0	1	1	1	0	0	0	0	3	3	2	1	4	2	3	0	4	3	2	4	6	10	10	9	5	5	7	3	2	1	2	1
Rv0166|AJW47853.1|UB21_00895|ARN04883.1|BJM02_00880|Probable fatty-acid-CoA ligase FadD5 (Fatty-acid-CoA synthetase) (Fatty-acid-CoA synthase)	8	13	4	11	1	1	1	0	3	1	5	2	18	31	14	14	4	6	1	3	2	11	1	2	6	7	4	4	8	4	8	5	2	6	4	4	3	9	3	3	13	8	13	4	2	0	2	0
Rv2731|AJW51383.1|UB21_14490|ARN08535.1|BJM02_14430|Conserved alanine and arginine rich protein	1	1	0	0	1	1	0	2	7	6	4	7	0	0	0	0	0	0	1	0	2	0	2	1	3	3	2	4	4	4	4	3	4	6	5	1	2	6	5	1	0	4	3	3	5	13	4	12
Rv0121c|AJW47818.1|UB21_00650|ARN04847.1|BJM02_00650|Conserved protein	0	0	0	1	1	0	1	1	2	1	1	0	0	0	0	0	0	0	0	0	1	0	0	1	3	2	6	0	4	4	9	3	7	5	9	5	4	6	3	6	16	4	10	4	0	2	0	2
Rv0540|AJW48176.1|UB21_02830|ARN05214.1|BJM02_02805|Uncharacterized protein	2	2	0	1	1	0	0	0	2	1	1	2	0	0	1	0	0	1	0	0	1	1	1	1	5	3	7	1	6	3	0	5	2	1	4	5	7	4	9	5	6	5	7	4	4	3	1	2
Rv2289|AJW49671.1|UB21_12095|ARN06770.1|BJM02_12050|Probable CDP-diacylglycerol pyrophosphatase (EC 3.6.1.26) (CDP-diacylglycerol phosphatidylhydrolase) (CDP-diglyceride hydrolase)	5	7	11	9	2	0	0	3	1	1	2	2	17	23	29	16	1	1	1	4	2	0	4	3	1	2	2	2	2	4	8	4	1	4	5	4	9	7	6	11	6	7	4	2	3	1	0	0
Rv1633|AJW51231.1|UB21_08645|ARN08406.1|BJM02_08600|UvrABC system protein B (Protein UvrB) (Excinuclease ABC subunit B)	1	6	3	4	2	0	1	0	6	4	10	5	2	0	2	2	0	1	2	0	0	2	0	0	2	2	1	4	4	3	4	9	7	8	7	5	8	3	12	0	2	7	3	3	6	0	6	4
Rv2467|AJW49825.1|UB21_13105|ARN06931.1|BJM02_13055|Alanine aminopeptidase (EC 3.4.11.2) (Aminopeptidase N) (Lysyl aminopeptidase)	0	2	1	3	0	0	0	1	4	3	1	5	0	0	1	0	0	0	0	0	0	0	1	0	3	7	3	3	5	11	4	4	5	7	5	4	3	7	4	5	0	9	4	5	3	7	1	3
Rv2590|AJW49918.1|UB21_13745|ARN07041.1|BJM02_13700|Probable fatty-acid-CoA ligase FadD9 (Fatty-acid-CoA synthetase) (Fatty-acid-CoA synthase)	0	1	0	0	0	0	0	0	1	4	3	1	0	0	0	0	2	0	0	0	0	0	0	3	3	2	2	2	5	4	4	4	4	6	8	1	5	3	4	1	8	5	10	3	9	3	0	0
Rv2205c|*|*|ARN06694.1|BJM02_11610|Uncharacterized protein Rv2205c	0	2	0	0	2	2	0	1	8	3	2	4	0	0	1	0	0	0	1	0	0	0	0	0	7	1	0	0	5	4	7	1	7	6	4	2	4	8	1	3	8	8	1	2	9	3	3	0
Rv1101c|AJW48667.1|UB21_05885|ARN05717.1|BJM02_05850|Putative transport protein Rv1101c	8	6	6	7	6	2	0	4	5	4	9	2	3	2	1	3	5	1	2	2	1	0	1	3	5	2	1	0	3	5	3	3	4	0	2	1	5	6	9	2	10	3	2	5	1	0	2	3
Rv3168|AJW50402.1|UB21_16780|ARN07549.1|BJM02_16750|Putative aminoglycoside phosphotransferase (EC 2.7.1.-) (Putative aminoglycoside antibiotics resistance enzyme)	1	1	1	0	0	2	0	0	13	7	5	5	0	1	0	1	1	0	1	0	0	3	3	0	4	1	3	0	7	1	5	4	5	6	5	2	3	4	3	4	4	6	1	3	5	7	3	5
Rv3193c|AJW50425.1|UB21_16920|ARN07573.1|BJM02_16890|UPF0182 protein Rv3193c	2	2	1	2	2	0	1	5	1	1	0	0	0	0	0	0	0	0	1	0	1	3	0	0	1	2	3	0	3	4	3	7	4	0	4	3	6	4	3	11	6	4	2	4	1	2	4	0
Rv3855|AJW50983.1|UB21_20470|ARN08143.1|BJM02_20420|HTH-type transcriptional regulator EthR	1	0	0	0	4	3	2	4	0	0	1	0	1	3	2	0	0	0	0	0	1	0	1	0	2	0	2	1	2	4	1	2	3	4	1	3	5	5	5	3	5	7	5	6	2	0	2	0
Rv2031c|AJW49463.1|UB21_10745|ARN06541.1|BJM02_10685|Alpha-crystallin (Acr) (14 kDa antigen) (16 kDa antigen) (HSP 16.3) (Nox16)	0	0	0	0	0	0	0	0	0	6	0	4	0	0	2	0	0	0	0	0	0	0	0	0	1	0	2	0	3	1	0	0	4	4	0	9	2	5	2	5	10	4	6	3	0	0	0	6
Rv2501c|AJW49848.1|UB21_13280|ARN06958.1|BJM02_13230|Acetyl-/propionyl-coenzyme A carboxylase alpha chain [Includes: Biotin carboxylase (EC 6.3.4.14); Biotin carboxyl carrier protein (BCCP)]	1	0	3	1	0	3	0	0	3	4	2	3	0	0	1	0	0	2	0	1	0	1	0	0	1	0	0	3	4	5	1	3	8	2	4	3	3	3	2	5	3	6	5	2	3	2	5	3
Rv2888c|AJW50166.1|UB21_15280|*|BJM02_15225|Putative amidase AmiC (EC 3.5.1.4)	1	1	1	0	276	244	235	230	5	6	3	9	1	2	2	1	155	118	113	110	187	164	137	124	1	2	0	1	2	0	0	1	1	1	1	2	5	5	3	7	2	1	6	1	1	2	4	4
Rv2974c|AJW50233.1|UB21_15725|ARN07370.1|BJM02_15670|Conserved hypothetical alanine rich protein	0	0	0	0	1	3	0	0	7	13	7	3	0	0	0	0	0	2	0	0	1	0	1	1	1	6	0	0	7	5	5	0	2	8	6	1	1	2	6	1	4	3	3	3	4	3	5	6
Rv3125c|AJW50363.1|UB21_16535|ARN07506.1|BJM02_16505|Uncharacterized PPE family protein PPE49	2	3	7	4	1	3	0	1	4	5	4	7	0	0	0	1	2	2	1	3	2	1	0	1	6	1	2	1	3	2	3	5	1	4	6	4	5	8	6	8	5	1	1	3	1	0	2	0
Rv1196|AJW48748.1|UB21_06395|ARN05799.1|BJM02_06365|PPE family protein PPE18	0	4	0	5	0	0	0	0	7	4	7	2	0	0	4	0	1	0	0	0	0	0	0	0	0	3	0	0	0	2	2	0	6	5	3	1	7	4	5	5	2	1	5	3	0	2	2	2
Rv2236c|*|*|ARN06724.1|BJM02_11785|Cobalamin biosynthesis protein CobD	1	2	0	1	0	0	0	0	0	1	2	3	0	0	0	0	0	0	0	1	0	0	0	1	0	0	0	3	6	0	1	2	8	4	1	3	3	3	4	5	8	3	3	3	1	2	1	1
Rv2743c|AJW51385.1|UB21_14550|ARN07174.1|BJM02_14495|Putative envelope-preserving system protein Rv2743c	2	2	4	2	0	0	2	2	2	3	4	5	0	0	0	0	1	0	2	1	0	2	1	0	2	3	7	0	7	2	4	1	4	3	10	5	2	5	3	4	5	5	3	4	4	1	1	0
*|AJW51280.1|UB21_10845|ARN08448.1|BJM02_10785|dolichol-phosphate mannosyltransferase	2	3	0	2	0	0	1	0	3	1	3	1	2	1	1	1	1	2	2	1	2	1	0	0	4	3	0	3	4	5	2	8	1	3	3	5	6	0	8	3	6	0	3	1	2	3	1	3
Rv3825c|AJW50960.1|UB21_20310|ARN08119.1|BJM02_20260|Phthioceranic/hydroxyphthioceranic acid synthase (EC 2.3.1.-) (Polyketide synthase pks2)	2	2	0	0	0	0	0	0	2	2	6	0	0	0	0	0	0	0	0	0	0	0	0	0	0	0	0	0	4	2	2	2	4	4	2	2	2	8	8	0	6	0	0	8	0	2	2	0
Rv0196|AJW47877.1|UB21_01050|ARN04909.1|BJM02_01035|Uncharacterized HTH-type transcriptional regulator Rv0196	1	2	0	0	1	0	0	1	1	0	0	0	0	0	0	0	0	1	0	0	1	1	2	1	0	2	2	0	2	2	0	1	1	0	5	3	3	2	1	6	4	3	5	6	2	1	1	1
Rv3772|AJW50917.1|UB21_20030|ARN08075.1|BJM02_19980|Putative phenylalanine aminotransferase (EC 2.6.1.-)	1	3	4	3	1	0	1	0	0	3	1	0	0	1	1	1	0	0	1	0	0	0	0	0	2	1	1	2	0	1	2	4	2	3	8	0	4	2	4	4	3	3	4	7	4	0	0	0
*|*|*|3053|BJM02_15455 |polyketide synthase	0	0	4	0	1	0	2	0	3	2	4	1	0	2	3	0	0	0	0	0	0	0	0	0	1	1	0	2	2	1	0	0	2	1	2	2	4	2	4	2	3	1	2	4	8	0	2	2
Rv1493|AJW49013.1|UB21_07995|ARN06069.1|BJM02_07960|Probable methylmalonyl-CoA mutase large subunit (MCM) (EC 5.4.99.2)	0	0	0	0	3	5	1	1	8	7	7	0	0	0	0	2	1	3	2	1	1	1	0	2	4	2	0	0	5	1	4	0	14	5	4	2	3	1	4	0	8	4	4	0	5	2	2	1
Rv0668|AJW48291.1|UB21_03515|ARN05331.1|BJM02_03490|DNA-directed RNA polymerase subunit beta' (RNAP subunit beta') (EC 2.7.7.6) (RNA polymerase subunit beta') (Transcriptase subunit beta')	0	2	0	2	0	0	0	0	3	6	2	2	2	0	0	4	0	2	0	0	0	0	0	0	0	4	0	0	0	0	0	1	6	2	6	4	6	0	5	4	3	2	6	0	4	0	2	0
Rv2623|AJW49947.1|UB21_13925|ARN07074.1|BJM02_13875|Universal stress protein Rv2623 (USP Rv2623)	0	0	0	0	0	0	0	0	4	0	2	4	0	0	2	0	0	0	0	0	0	0	0	0	0	0	0	0	1	0	2	0	1	2	0	2	0	0	0	6	4	4	4	4	4	2	0	3
Rv3433c|AJW50634.1|UB21_18240|ARN07786.1|BJM02_18210|Bifunctional NAD(P)H-hydrate repair enzyme Nnr (Nicotinamide nucleotide repair protein) [Includes: ADP-dependent (S)-NAD(P)H-hydrate dehydratase (EC 4.2.1.136) (ADP-dependent NAD(P)HX dehydratase); NAD(P)H-hydrate epimerase (EC 5.1.99.6) (NAD(P)HX epimerase)]	0	0	0	1	1	0	0	1	0	0	1	0	0	0	0	0	0	1	0	1	0	1	1	0	0	0	0	0	3	2	2	0	3	2	2	2	5	6	3	7	2	2	1	2	0	1	0	2
Rv0211|AJW47888.1|UB21_01125|ARN04920.1|BJM02_01110|Phosphoenolpyruvate carboxykinase [GTP] (PEP carboxykinase) (PEPCK) (EC 4.1.1.32) (GTP-dependent phosphoenolpyruvate carboxykinase) (GTP-PEPCK)	0	0	0	0	0	0	0	0	1	0	4	2	0	2	0	0	0	0	0	0	0	0	0	0	0	0	0	2	2	2	2	0	5	0	6	3	10	2	6	2	2	4	0	0	0	0	0	4
Rv1872c|AJW49319.1|UB21_09830|ARN06387.1|BJM02_09775|Putative L-lactate dehydrogenase (EC 1.1.-.-)	0	2	2	0	0	0	0	0	0	0	4	0	0	0	0	0	0	0	0	0	0	0	0	0	1	0	0	2	0	0	0	4	4	2	2	0	4	0	2	4	2	2	4	4	4	0	0	4
*|*|*|1136|BJM02_05765 |PE family protein	0	0	0	0	2	5	0	4	2	0	2	2	0	0	0	0	1	1	3	1	1	0	3	1	0	0	1	0	3	3	0	1	6	4	1	1	2	2	3	2	1	1	8	2	2	3	2	1
Rv0667|AJW48290.1|UB21_03510|ARN05330.1|BJM02_03485|DNA-directed RNA polymerase subunit beta (RNAP subunit beta) (EC 2.7.7.6) (RNA polymerase subunit beta) (Transcriptase subunit beta)	0	1	0	0	0	0	0	0	8	0	20	8	2	0	2	0	2	0	0	0	0	0	1	0	0	2	0	0	2	0	0	0	4	4	2	0	4	0	0	2	3	0	2	6	2	4	2	4
Rv3350c|*|*|*|BJM02_17755|PPE family protein PPE56	1	0	0	0	4	10	6	13	5	0	3	1	0	0	0	0	2	5	2	0	1	3	0	2	0	2	2	1	5	1	3	1	8	2	2	0	1	4	2	3	3	3	4	1	4	1	2	1
RVnc0024_mcr7	0	0	0	0	0	0	0	0	0	0	0	0	2	0	0	0	2	2	0	0	0	6	2	0	0	0	4	0	0	0	0	0	0	0	0	0	4	2	0	4	4	6	2	3	0	2	0	2
*|*|*|3675|BJM02_18590 |PE-PGRS family protein	0	0	1	2	4	9	7	9	3	1	2	0	1	0	1	0	3	1	3	7	5	4	1	3	0	1	1	0	1	1	4	2	1	3	0	3	4	1	2	4	0	1	2	4	7	2	1	0
Rv1983|AJW48560.1|UB21_05185|*|BJM02_10395|PE cleavage protein A (PE-PGRS family protein PE_PGRS35)	0	0	0	0	15	25	18	20	5	2	3	4	0	0	0	0	3	3	3	8	6	7	7	7	3	1	1	1	1	1	1	1	0	1	1	0	3	5	1	3	3	0	1	2	2	2	2	4
Rv3879c|*|*|ARN08166.1|BJM02_20540|ESX-1 secretion-associated protein EspK	4	1	0	1	0	0	1	1	0	1	0	3	0	0	0	0	0	1	0	0	0	0	0	0	2	0	1	0	0	1	2	1	0	0	7	3	3	3	5	2	4	1	0	3	0	3	2	2
Rv0399c|*|*|ARN05089.1|BJM02_02065|Possible conserved lipoprotein LpqK	0	2	0	0	0	0	0	0	5	1	1	0	0	0	0	0	0	0	0	0	0	0	0	0	3	1	3	0	5	5	0	4	4	3	1	1	4	2	2	2	5	4	4	2	1	0	0	1
Rv0785|AJW48403.1|UB21_04145|ARN05444.1|BJM02_04120|KsdD-like steroid dehydrogenase Rv0785 (EC 1.3.99.-)	1	0	0	1	0	0	0	0	0	0	0	0	0	0	0	0	0	0	0	0	0	0	0	0	2	0	3	1	3	0	3	1	3	2	0	1	1	5	2	6	3	2	4	1	1	2	0	0
Rv1527c|*|*|ARN06100.1|BJM02_08145|Mycocerosic acid synthase-like polyketide synthase (MAS-like PKS) (EC 2.3.1.-) (Polyketide synthase Pks5)	2	4	1	1	2	0	0	0	1	0	4	1	0	0	0	0	0	0	0	1	0	0	0	1	2	2	2	0	1	4	1	0	1	3	5	1	3	2	4	3	0	5	6	2	1	0	0	1
Rv3130c|AJW50371.1|UB21_16580|ARN07514.1|BJM02_16550|Probable diacyglycerol O-acyltransferase tgs1 (TGS1) (EC 2.3.1.20) (Probable triacylglycerol synthase tgs1)	0	0	0	0	0	0	0	0	2	6	2	2	0	0	0	2	0	0	0	0	0	0	0	0	0	0	0	0	0	2	0	0	2	0	2	2	0	3	2	2	10	2	2	6	0	0	0	0
Rv3596c|AJW50764.1|UB21_19090|ARN07921.1|BJM02_19040|ATP-dependent Clp protease ATP-binding subunit ClpC1	4	0	0	0	0	0	0	0	2	3	5	1	0	0	0	0	0	0	0	0	0	0	0	0	0	0	2	0	2	0	0	2	2	2	0	2	6	2	0	2	10	0	0	4	0	3	0	0
Rv2324|AJW49704.1|UB21_12310|ARN06804.1|BJM02_12265|Probable transcriptional regulatory protein (Probably AsnC-family)	2	2	2	2	7	3	2	3	1	5	2	6	0	0	0	0	0	1	2	7	2	2	2	2	1	1	0	3	2	1	2	2	2	1	0	1	0	0	2	3	0	2	2	2	5	2	2	6
Rv2395A|AJW49764.1|UB21_12690|ARN06867.1|BJM02_12650|Acid and phagosome regulated protein A AprA	0	0	4	0	0	0	0	0	0	0	0	0	0	0	0	0	0	0	0	0	0	0	0	0	2	0	0	0	2	2	0	0	0	6	2	0	3	2	0	4	3	6	2	2	0	2	0	2
Rv3823c|AJW50958.1|UB21_20300|ARN08117.1|BJM02_20250|Sulfolipid-1 exporter MmpL8	3	1	0	0	3	3	2	1	4	1	3	2	0	0	0	0	0	1	0	0	0	3	0	1	0	0	1	0	1	2	0	2	4	2	2	3	4	0	2	8	0	0	4	1	2	1	3	1
Rv0282|AJW47954.1|UB21_01505|ARN04988.1|BJM02_01490|ESX-3 secretion system protein EccA3 (ESX conserved component A3) (Type VII secretion system protein EccA3) (T7SS protein EccA3)	0	0	0	2	0	0	0	0	0	0	0	0	0	2	0	0	0	0	0	0	0	0	0	0	0	0	0	0	2	2	0	0	0	2	0	0	4	6	4	1	2	0	0	0	0	4	2	2
Rv0284|AJW47956.1|UB21_01515|ARN04990.1|BJM02_01500|ESX-3 secretion system protein EccC3 (ESX conserved component C3) (Type VII secretion system protein EccC3) (T7SS protein EccC3)	2	4	0	0	0	0	0	0	2	0	4	0	2	0	0	0	0	0	2	0	0	0	0	0	0	0	0	4	0	0	1	0	0	2	2	4	7	2	0	4	0	2	0	2	2	0	4	2
Rv0355c|*|*|*|BJM02_01845|PPE family protein PPE8	0	0	2	0	0	0	1	3	1	1	1	3	0	0	0	0	0	0	1	0	0	0	0	0	3	3	0	1	2	2	1	1	0	1	2	1	3	1	2	1	4	2	2	4	3	0	3	0
Rv1461|AJW48981.1|UB21_07815|ARN06037.1|BJM02_07780|UPF0051 protein Rv1461 [Cleaved into: Endonuclease PI-MtuHIIP (EC 3.1.-.-) (Mtu pps1 intein)]	0	0	0	2	0	0	0	0	2	0	0	2	4	0	0	0	0	0	0	0	0	0	0	0	4	0	4	0	0	2	0	0	0	2	0	2	4	2	2	4	0	7	6	0	0	0	0	0
Rv3804c|AJW50944.1|UB21_20200|ARN08101.1|BJM02_20150|Diacylglycerol acyltransferase/mycolyltransferase Ag85A (DGAT) (EC 2.3.1.122) (EC 2.3.1.20) (Acyl-CoA:diacylglycerol acyltransferase) (Antigen 85 complex A) (85A) (Ag85A) (Fibronectin-binding protein A) (Fbps A)	0	0	4	2	0	0	0	1	0	0	2	3	1	0	0	0	0	1	0	0	0	0	2	2	0	0	2	2	2	0	0	0	6	0	0	4	2	0	0	6	0	2	5	2	6	2	0	0
*|*|*|2215|BJM02_11195 |hypothetical protein	0	0	0	0	2	6	1	0	2	2	1	3	0	0	0	0	1	1	0	2	1	1	0	1	2	0	1	2	3	1	1	0	4	3	2	5	0	2	3	1	2	5	3	0	1	2	3	2
Rv0832|*|*|ARN05483.1|BJM02_04385|PE-PGRS family protein PE_PGRS12	2	4	0	0	0	1	0	1	2	2	1	0	0	0	0	0	0	0	0	0	0	0	0	0	0	1	0	1	7	3	0	1	4	3	5	0	4	1	2	3	5	4	3	0	0	1	0	1
Rv1338|AJW48874.1|UB21_07160|ARN05928.1|BJM02_07125|Glutamate racemase (EC 5.1.1.3)	2	2	0	1	1	2	0	0	7	2	2	3	0	0	0	1	0	2	1	0	0	1	1	2	2	2	3	2	3	0	4	2	4	2	1	5	1	4	7	1	1	4	3	0	1	1	0	1
Rv1845c|AJW49294.1|UB21_09695|ARN06361.1|BJM02_09640|Possible sensor-transducer protein BlaR	1	1	0	3	0	0	0	0	0	0	1	1	2	0	0	0	0	0	0	0	0	0	0	0	0	0	2	1	6	1	1	5	2	3	2	1	6	1	1	1	2	3	2	2	2	1	2	1
Rv2015c|*|*|ARN06523.1|BJM02_10575|HNHc domain-containing protein	0	0	0	0	0	3	2	2	9	7	4	3	0	0	0	0	2	0	0	0	0	0	0	0	1	1	0	0	4	1	0	1	5	4	3	1	1	4	2	0	1	3	0	5	2	3	2	1
Rv3248c|AJW50472.1|UB21_17230|ARN08609.1|BJM02_17200|Adenosylhomocysteinase (EC 3.3.1.1) (S-adenosyl-L-homocysteine hydrolase) (AdoHcyase)	2	0	2	0	0	0	0	0	2	0	3	0	0	2	2	2	0	0	0	2	0	0	0	0	0	0	0	0	0	0	0	0	2	2	0	0	4	2	4	4	2	0	6	0	2	0	0	0
Rv3800c|*|*|ARN08097.1|BJM02_20130|Polyketide synthase Pks13	0	0	0	0	0	2	0	0	2	0	0	2	0	0	0	2	0	2	0	0	0	0	0	0	1	4	2	0	1	1	2	0	2	4	2	0	4	2	4	0	8	2	2	2	0	0	0	0
Rv0330c|AJW47996.1|UB21_01740|ARN05029.1|BJM02_01725|HTH tetR-type domain-containing protein	0	1	0	0	83	96	85	87	3	8	6	10	0	0	0	0	59	47	51	55	41	43	46	30	3	0	0	2	2	0	2	0	1	1	1	0	5	2	2	6	1	0	2	1	3	1	0	0
Rv0473|AJW51092.1|UB21_02475|ARN08257.1|BJM02_02450|Possible conserved transmembrane protein	1	2	1	3	0	0	2	1	9	2	1	2	0	0	2	0	0	0	0	1	1	2	1	0	1	0	1	2	0	1	2	1	1	0	1	3	1	0	4	4	3	5	5	1	0	0	0	0
Rv2447c|AJW49810.1|UB21_12995|ARN06914.1|BJM02_12945|Dihydrofolate synthase/folylpolyglutamate synthase (DHFS / FPGS) (EC 6.3.2.12) (EC 6.3.2.17) (Folylpoly-gamma-glutamate synthetase) (Tetrahydrofolylpolyglutamate synthase)	0	1	0	2	3	4	1	4	5	4	10	1	0	0	0	0	0	1	1	0	1	1	4	2	0	0	3	1	3	3	2	1	9	6	2	1	1	1	1	1	3	2	3	3	2	4	1	1
Rv3051c|AJW50300.1|UB21_16150|ARN07440.1|BJM02_16115|Ribonucleoside-diphosphate reductase subunit alpha (EC 1.17.4.1) (Ribonucleotide reductase R1 subunit)	0	0	6	0	0	0	0	0	4	4	2	0	0	0	1	3	0	0	0	0	0	2	0	0	2	0	0	2	0	0	0	0	4	2	4	0	2	2	2	4	3	2	2	0	2	0	0	4
*|*|*|3501|BJM02_17720 |hypothetical protein	1	0	0	0	0	0	0	0	2	2	1	0	2	0	0	1	1	0	1	1	0	0	1	0	0	0	0	2	2	1	2	0	0	1	0	0	2	3	3	2	0	1	1	0	3	3	2	2
Rv0079|AJW51048.1|UB21_00430|ARN08212.1|BJM02_00430|Dormancy associated translation inhibitor (DATIN)	0	2	0	0	0	0	0	0	6	0	0	0	2	2	0	0	0	2	0	1	0	0	0	0	0	0	0	0	0	0	4	0	0	0	0	2	2	2	4	6	4	0	2	0	2	0	0	0
Rv0120c|AJW47817.1|UB21_00645|ARN04846.1|BJM02_00645|Elongation factor G-like protein	3	0	2	0	1	0	0	0	3	1	1	2	2	1	1	0	1	0	1	0	1	0	2	1	0	2	2	1	2	5	0	2	1	2	3	2	3	6	2	2	2	2	2	1	0	2	0	0
Rv2946c|*|*|ARN08557.1|BJM02_15520|Putative inactive phenolphthiocerol synthesis polyketide synthase type I Pks1	0	1	0	2	1	1	1	1	4	0	2	2	0	0	0	0	1	1	0	0	1	0	0	2	2	2	0	2	0	0	0	0	5	0	4	2	2	0	8	2	0	2	2	2	2	2	0	0
Rv3189|AJW50420.1|UB21_16880|ARN07568.1|BJM02_16850|Probable NAD(+) phosphorylase Rv3189 (EC 2.4.2.-) (Mycobacterial cidal toxin Rv3189)	0	0	0	1	0	1	0	0	7	4	6	2	0	0	0	0	2	2	1	0	0	0	0	1	1	0	2	1	6	1	3	1	3	5	3	3	1	3	3	0	2	0	2	3	6	1	1	0
Rv3202c|AJW50432.1|UB21_16980|ARN07580.1|BJM02_16950|DNA helicase (EC 3.6.4.12)	0	1	0	0	0	0	0	0	0	1	1	0	0	0	0	0	0	0	0	0	0	0	0	0	1	2	0	3	0	0	3	2	0	1	0	1	1	3	1	4	4	1	2	2	0	0	2	2
*|*|*|3060|BJM02_15490 |polyketide synthase	2	2	2	0	2	0	0	0	2	2	0	4	0	4	0	0	0	2	0	0	0	0	0	0	0	4	0	0	0	0	0	2	2	2	4	6	4	0	6	4	2	0	2	0	1	0	0	2
Rv1099c|AJW51176.1|UB21_05875|ARN08341.1|BJM02_05840|Fructose-1,6-bisphosphatase class 2 (FBPase class 2) (EC 3.1.3.11) (D-fructose-1,6-bisphosphate 1-phosphohydrolase class 2) (Fructose 1,6-bisphosphatase II)	1	0	0	0	0	1	0	0	4	1	3	1	0	0	0	0	0	0	0	0	0	0	0	0	1	0	0	1	3	3	1	0	2	0	3	0	0	0	2	1	5	0	1	3	3	1	2	3
Rv3549c|AJW50724.1|UB21_18850|ARN07879.1|BJM02_18800|Probable short-chain type dehydrogenase/reductase	2	1	0	3	2	0	0	0	1	0	0	1	0	0	0	0	0	1	0	1	0	0	0	0	0	1	2	1	2	1	2	4	5	3	6	2	3	3	5	2	2	1	2	1	0	1	1	0
*|*|*|2130|BJM02_10770 |polyketide synthase	0	1	0	0	1	3	0	0	3	0	4	0	0	0	0	0	0	1	0	0	0	0	0	0	1	2	1	3	0	1	3	2	3	3	3	6	2	4	1	4	2	0	2	2	0	0	0	3
Rv3682|AJW50838.1|UB21_19535|ARN07993.1|BJM02_19480|Penicillin-insensitive transglycosylase (EC 2.4.1.129) (Peptidoglycan TGase)	0	0	0	2	0	0	0	0	0	1	0	0	4	2	0	3	0	0	0	0	0	0	0	0	0	1	2	0	2	0	1	0	1	0	5	2	0	0	2	2	5	5	1	1	2	0	2	0
*|*|*|3673|BJM02_18580 |PE-PGRS family protein	0	1	1	0	1	0	1	0	1	5	1	1	0	0	0	0	0	0	1	1	0	3	0	0	0	2	1	1	3	0	1	2	3	1	4	1	2	1	4	1	2	1	4	2	1	0	0	1
Rv0244c|AJW47917.1|UB21_01300|ARN04951.1|BJM02_01285|Probable acyl-CoA dehydrogenase FadE5	0	0	0	2	0	0	0	0	2	0	0	4	0	0	2	0	0	2	0	0	1	0	0	0	0	0	0	0	0	0	4	6	4	2	2	2	2	0	3	4	0	2	4	2	0	0	0	2
Rv1094|AJW48661.1|UB21_05850|ARN05711.1|BJM02_05815|Putative acyl-[acyl-carrier-protein] desaturase DesA2 (Putative acyl-ACP desaturase DesA2) (EC 1.14.19.-)	0	0	0	0	0	0	0	0	2	0	0	0	0	0	0	0	0	0	0	0	0	0	0	0	0	0	0	4	4	2	0	0	0	0	4	2	4	2	2	0	4	0	0	2	2	0	2	1
Rv1195|AJW51190.1|UB21_06390|ARN08357.1|BJM02_06360|PE family protein PE13	0	0	4	0	0	0	0	0	1	1	4	0	0	0	1	0	0	0	0	0	0	0	0	0	0	0	0	0	0	0	0	1	2	0	0	0	2	3	6	2	2	1	0	0	0	0	0	3
Rv1738|AJW51246.1|UB21_09200|ARN08420.1|BJM02_09155|Uncharacterized protein Rv1738	4	0	0	2	0	0	0	0	2	0	2	0	0	0	0	0	0	0	0	0	0	0	0	0	2	0	0	0	0	0	0	0	0	0	0	2	0	0	6	2	0	5	2	0	2	2	0	0
Rv2703|AJW51378.1|UB21_14350|ARN08530.1|BJM02_14290|RNA polymerase sigma factor SigA (Sigma-A)	2	0	0	0	0	0	0	0	0	0	2	0	0	0	2	0	0	0	0	0	0	0	0	0	0	1	0	2	0	0	0	0	1	0	6	0	4	2	4	0	4	2	0	0	0	0	2	1
Rv2932|*|*|ARN07340.1|BJM02_15450|Phenolphthiocerol/phthiocerol polyketide synthase subunit B (EC 2.3.1.292) ((Phenol)carboxyphthiodiolenone synthase subunit B) (Beta-ketoacyl-acyl-carrier-protein synthase I) (Phthiocerol synthesis polyketide synthase type I PpsB)	0	0	0	0	1	0	0	0	1	1	0	0	4	0	0	0	0	0	0	0	0	0	0	0	0	0	0	0	1	0	0	0	0	0	0	2	2	2	2	3	0	0	0	3	1	4	0	2
Rv3131|AJW50372.1|UB21_16585|ARN07515.1|BJM02_16555|Putative NAD(P)H nitroreductase Rv3131	0	0	0	0	0	0	0	0	0	6	4	0	2	0	0	0	0	0	0	0	0	0	0	0	0	0	0	0	2	0	0	0	6	0	2	4	3	2	0	0	2	0	0	1	0	8	0	3
Rv3134c|*|*|ARN07518.1|BJM02_16570|Universal stress protein Rv3134c (USP Rv3134c)	0	0	0	0	0	0	0	0	2	3	2	2	0	0	0	0	0	0	0	0	0	0	0	0	0	2	0	0	0	0	0	0	0	0	2	0	3	0	2	3	2	2	2	1	0	0	2	2
Rv3240c|AJW50466.1|UB21_17190|ARN07615.1|BJM02_17160|Protein translocase subunit SecA 1 (tbSecA)	0	0	2	0	0	2	0	0	2	2	0	3	0	0	0	2	0	3	0	0	0	2	0	1	1	2	0	0	2	1	1	3	0	1	3	0	3	0	1	2	5	4	1	3	0	0	0	0
*|*|*|2254|BJM02_11395 |hypothetical protein	1	3	1	1	115	110	139	130	1	3	1	2	0	0	0	1	49	66	66	51	63	62	62	60	0	0	0	0	1	1	1	0	0	2	1	0	4	3	2	2	3	1	1	0	0	1	0	1
*|*|*|3502|BJM02_17725 |PE family protein	1	0	1	1	1	0	0	1	3	0	1	1	0	0	0	0	0	0	0	0	1	0	1	0	2	0	1	3	0	5	1	1	0	2	2	0	0	0	2	5	3	0	2	2	1	1	0	2
*|*|*|ARN07066.1|BJM02_13835 |PE family protein	1	0	0	0	7	6	3	5	1	0	0	1	0	0	0	0	1	0	0	2	2	2	0	7	0	3	0	0	0	0	1	0	0	0	1	1	1	4	1	8	0	0	1	1	0	2	0	0
Rv0610c|AJW48238.1|UB21_03195|ARN05278.1|BJM02_03170|Uncharacterized protein	0	0	1	1	1	1	2	1	3	2	0	1	0	0	0	0	0	0	0	0	0	0	1	0	2	0	0	1	1	2	0	3	3	2	1	2	1	0	2	0	2	2	0	0	4	2	3	2
Rv1161|AJW48723.1|UB21_06225|ARN05775.1|BJM02_06195|Nitrate reductase alpha subunit (EC 1.7.5.1)	2	0	2	0	0	0	0	0	2	0	0	3	0	0	2	0	0	0	0	0	0	0	0	0	1	0	2	4	0	4	2	2	0	2	0	0	0	2	4	2	4	2	0	0	2	0	2	0
Rv2934|AJW50202.1|UB21_15515|*|BJM02_15460|Phenolphthiocerol/phthiocerol polyketide synthase subunit D (EC 2.3.1.292) ((Phenol)carboxyphthiodiolenone synthase subunit D) (Beta-ketoacyl-acyl-carrier-protein synthase I) (Phthiocerol synthesis polyketide synthase type I PpsD)	0	0	0	4	4	2	3	4	2	0	3	3	2	0	2	0	2	0	1	1	0	1	1	0	0	0	0	0	0	1	0	2	0	0	4	2	1	2	2	2	0	2	0	6	3	0	0	0
Rv3614c|AJW50781.1|UB21_19180|ARN07938.1|BJM02_19130|ESX-1 secretion-associated protein EspD	0	0	0	0	0	0	0	0	0	0	3	3	0	0	2	0	1	0	0	0	0	0	0	1	0	0	0	0	3	1	1	4	4	0	0	0	2	0	1	4	0	1	2	2	2	1	3	0
Rv3886c|AJW51008.1|UB21_20630|ARN08171.1|BJM02_20575|Mycosin-2 (EC 3.4.21.-) (MycP2 protease)	0	2	1	2	16	24	18	22	0	2	4	3	0	0	0	1	6	12	9	11	16	13	8	18	0	1	3	0	0	0	0	0	1	1	3	1	2	3	1	2	1	2	1	0	3	0	1	2
*|*|*|310|BJM02_01565 |PE family protein	0	0	0	0	2	0	0	0	2	0	0	1	0	0	0	0	0	0	0	2	0	0	0	1	1	0	0	0	1	0	4	1	1	4	0	1	1	0	5	3	1	4	0	1	0	0	0	2
Rv0318c|AJW51081.1|UB21_01685|ARN08243.1|BJM02_01670|Probable conserved integral membrane protein	3	2	0	0	0	0	0	0	0	2	0	0	0	0	0	0	0	0	0	0	0	0	0	0	0	0	1	0	0	2	0	0	2	2	1	0	0	3	0	1	3	2	2	2	1	2	0	1
Rv0423c|AJW48074.1|UB21_02205|ARN08251.1|BJM02_02185|Phosphomethylpyrimidine synthase (EC 4.1.99.17) (Hydroxymethylpyrimidine phosphate synthase) (HMP-P synthase) (HMP-phosphate synthase) (HMPP synthase) (Thiamine biosynthesis protein ThiC)	0	0	0	0	0	0	2	0	0	0	0	0	0	2	2	0	0	0	0	0	0	0	0	0	2	0	0	0	0	0	0	0	0	1	0	0	1	2	0	2	4	0	2	2	0	2	2	0
Rv1297|AJW48836.1|UB21_06920|ARN05888.1|BJM02_06890|Transcription termination factor Rho (EC 3.6.4.-) (ATP-dependent helicase Rho)	0	0	0	0	0	0	0	0	4	4	4	0	0	0	0	0	0	0	0	0	0	0	0	0	0	0	0	0	4	0	0	0	0	0	0	0	0	2	2	4	0	2	4	3	0	0	0	0
Rv2524c|*|*|ARN06982.1|BJM02_13365|Probable fatty acid synthase Fas (Fatty acid synthetase)	1	0	2	2	0	0	1	0	4	0	4	4	5	1	0	0	0	0	0	0	2	0	1	0	0	5	0	4	1	0	1	5	2	2	2	2	0	2	1	0	11	0	1	2	0	0	0	0
Rv2986c|AJW50245.1|UB21_15785|ARN07380.1|BJM02_15730|DNA-binding protein HU homolog (21 kDa laminin-2-binding protein) (28 kDa iron-regulated protein) (Irep-28) (Histone-like protein) (Hlp)	0	0	0	0	0	0	0	0	0	0	2	2	0	0	0	0	0	0	0	0	0	0	0	0	0	0	2	0	0	0	0	0	0	0	2	0	0	4	6	1	2	0	0	0	0	2	2	0
Rv3276c|AJW51459.1|UB21_17370|ARN08611.1|BJM02_17340|N5-carboxyaminoimidazole ribonucleotide synthase (N5-CAIR synthase) (EC 6.3.4.18) (5-(carboxyamino)imidazole ribonucleotide synthetase)	0	2	0	0	0	0	1	1	0	0	0	1	1	0	1	0	0	0	0	0	0	1	1	0	3	2	1	1	1	1	2	0	0	2	3	3	1	1	1	4	1	2	2	2	1	2	0	0
Rv3583c|AJW50754.1|UB21_19025|ARN07911.1|BJM02_18975|RNA polymerase-binding transcription factor CarD	0	2	0	0	0	0	0	0	1	2	0	4	0	0	2	0	0	0	0	0	0	0	0	0	3	0	0	0	0	0	0	0	0	0	0	0	2	2	4	4	2	0	0	0	0	0	3	0
Rv3691|AJW51517.1|UB21_19585|ARN08001.1|BJM02_19530|Uncharacterized membrane protein Rv3691	0	0	0	0	3	3	3	3	1	1	3	0	0	0	0	0	3	1	0	3	0	1	0	2	0	0	0	1	2	2	1	0	3	2	3	1	4	1	1	4	2	1	0	0	4	0	0	0
Rv0006|AJW47727.1|UB21_00040|ARN04751.1|BJM02_00040|DNA gyrase subunit A (EC 5.6.2.2) (Type IIA topoisomerase subunit GyrA)	0	0	0	2	0	0	0	0	0	0	0	0	0	0	0	0	0	0	0	0	0	0	0	0	2	0	0	0	0	0	0	0	0	0	1	4	0	4	4	0	2	2	0	2	0	0	0	2
Rv0138|AJW47830.1|UB21_00740|ARN04861.1|BJM02_00735|SnoaL-like domain-containing protein	0	0	0	0	0	0	0	0	0	0	0	0	0	1	1	0	0	0	1	0	0	0	0	0	0	0	0	0	7	0	5	0	8	1	1	1	0	1	0	2	4	2	4	1	2	0	0	0
Rv0234c|AJW47907.1|UB21_01245|ARN04941.1|BJM02_01230|Succinate-semialdehyde dehydrogenase [NADP(+)] 1 (SSADH 1) (SSDH 1) (EC 1.2.1.79)	0	0	0	0	0	0	2	0	1	0	0	0	0	0	0	0	0	0	0	0	0	0	1	1	0	0	0	0	0	0	0	0	2	3	0	2	0	0	1	2	2	0	4	0	2	2	2	1
Rv0685|AJW48306.1|UB21_03605|ARN05346.1|BJM02_03580|Elongation factor Tu (EF-Tu)	4	0	4	2	0	0	1	0	1	4	0	2	0	0	0	0	0	0	0	0	0	2	0	0	3	0	0	2	0	0	0	0	4	0	0	0	2	1	2	0	0	3	4	3	0	0	1	0
Rv1180/Rv1181|AJW48739.1|UB21_06320|ARN08352.1|BJM02_06290|Mycolipanoate synthase (EC 2.3.1.252) (Mycocerosic acid synthase-like polyketide synthase) (MAS-like PKS) (Mycolipanoic/mycolipenic acids synthase-like polyketide synthase)	2	2	0	2	4	0	0	0	2	5	0	2	0	0	0	0	0	0	0	0	0	0	0	0	0	0	0	0	5	0	2	0	0	0	2	6	0	3	0	4	4	0	0	0	0	0	2	3
Rv1348|AJW48883.1|UB21_07215|ARN05937.1|BJM02_07180|Mycobactin import ATP-binding/permease protein IrtA (EC 7.2.2.-) (Iron-regulated transporter A)	1	3	1	3	2	6	1	1	0	1	0	1	0	2	0	0	1	0	0	2	0	1	0	0	1	1	3	0	0	2	2	2	1	0	0	2	0	1	2	3	3	0	3	0	3	0	0	1
Rv1859|AJW49308.1|UB21_09765|ARN06374.1|BJM02_09710|Molybdenum import ATP-binding protein ModC (EC 7.3.2.5)	1	3	2	3	2	0	0	1	2	2	5	3	0	0	1	3	2	0	1	3	1	1	1	0	3	0	1	3	3	1	3	2	1	6	2	1	3	2	0	2	0	3	3	2	0	1	0	0
Rv3428c|AJW50626.1|UB21_18195|ARN07778.1|BJM02_18165|Putative transposase Rv3428c	0	0	1	0	0	0	0	0	1	0	0	0	1	0	0	1	0	0	2	1	0	0	1	0	1	0	2	1	1	1	3	0	1	0	0	0	3	2	1	2	0	0	2	5	0	0	1	0
Rv3701c|AJW50853.1|UB21_19640|ARN08010.1|BJM02_19585|Histidine N-alpha-methyltransferase (EC 2.1.1.44) (Histidine trimethyltransferase)	0	2	1	1	0	0	0	0	1	0	0	0	0	0	0	0	0	1	0	0	0	0	0	1	0	0	3	2	1	0	4	4	1	0	0	2	4	0	1	2	4	1	2	2	0	0	0	0
*|*|*|3764|BJM02_19035 |PE family protein	0	0	1	0	2	7	1	2	2	0	2	0	0	0	0	0	4	2	1	1	4	2	5	3	0	0	0	2	1	0	1	2	0	0	0	0	1	1	1	1	5	3	0	1	0	0	0	2
Rv0400c|AJW48054.1|UB21_02090|ARN05090.1|BJM02_02070|Acyl-CoA dehydrogenase FadE7	0	0	0	0	0	0	0	0	1	0	0	0	0	0	0	0	0	0	0	0	0	0	0	0	0	1	2	0	0	3	3	1	2	0	2	0	3	5	0	0	5	0	2	0	0	0	0	0
Rv0824c|AJW48439.1|UB21_04355|ARN05478.1|BJM02_04325|Putative acyl-[acyl-carrier-protein] desaturase DesA1 (Putative acyl-ACP desaturase DesA1) (EC 1.14.19.-)	0	0	0	0	0	0	0	0	3	2	5	0	2	2	0	0	0	0	0	0	0	0	0	2	2	0	4	0	1	0	2	2	0	3	2	4	2	0	3	4	0	2	0	2	0	0	2	0
Rv0870c|AJW48474.1|UB21_04615|ARN05513.1|BJM02_04585|Possible conserved integral membrane protein	0	0	0	1	0	1	0	0	1	0	1	1	0	0	1	1	0	0	1	0	0	0	0	0	3	0	0	1	1	1	0	3	2	1	1	2	2	2	3	1	1	0	2	2	1	0	1	0
Rv1011|AJW51161.1|UB21_05375|ARN05632.1|BJM02_05340|4-diphosphocytidyl-2-C-methyl-D-erythritol kinase (CMK) (EC 2.7.1.148) (4-(cytidine-5'-diphospho)-2-C-methyl-D-erythritol kinase)	0	0	1	0	46	54	46	60	4	3	1	5	0	0	0	0	29	39	31	33	17	22	23	20	1	0	0	1	0	0	0	0	1	1	0	0	1	1	1	2	1	2	2	0	2	1	1	1
Rv1402|AJW51212.1|UB21_07510|ARN08383.1|BJM02_07470|Probable primosomal protein N' (EC 3.6.4.-) (ATP-dependent helicase PriA)	0	0	0	3	1	0	0	0	5	2	0	1	0	0	0	0	1	0	1	1	0	0	0	0	1	0	0	0	1	2	0	0	0	0	0	1	3	1	1	0	3	0	0	2	0	3	0	2
Rv1623c|AJW49115.1|UB21_08590|ARN06170.1|BJM02_08545|Probable integral membrane cytochrome D ubiquinol oxidase (Subunit I) CydA (Cytochrome BD-I oxidase subunit I)	0	0	0	0	0	0	0	0	0	0	2	0	0	0	0	0	0	0	0	0	3	0	0	0	0	0	0	0	6	2	0	4	2	0	1	0	2	2	2	0	2	1	1	1	0	1	1	2
Rv3644c|AJW50805.1|UB21_19335|ARN07962.1|BJM02_19285|DNA polymerase III subunit delta' (EC 2.7.7.7)	0	0	0	0	6	4	6	7	1	4	0	0	0	0	0	0	5	7	8	3	6	1	4	2	0	0	0	0	0	0	0	2	2	0	1	1	0	1	1	4	0	3	1	2	0	0	3	0
Rv0289|AJW47961.1|UB21_01540|ARN04995.1|BJM02_01525|ESX-3 secretion-associated protein EspG3	0	1	0	0	0	1	0	1	0	1	0	2	0	0	0	0	0	0	0	0	0	0	0	0	3	0	0	0	0	0	0	2	0	0	2	2	1	4	0	0	2	0	0	0	0	0	4	3
Rv0291|AJW47963.1|UB21_01550|ARN04997.1|BJM02_01535|Mycosin-3 (EC 3.4.21.-) (MycP3 protease)	2	2	0	0	0	0	0	0	2	0	0	0	0	0	0	1	0	0	0	0	0	0	0	0	0	0	0	0	0	0	0	2	0	2	0	2	2	2	0	2	4	4	0	0	0	0	0	0
Rv0468|AJW48118.1|UB21_02445|ARN05152.1|BJM02_02420|3-hydroxybutyryl-CoA dehydrogenase (EC 1.1.1.157) (Beta-hydroxybutyryl-CoA dehydrogenase) (BHBD)	0	0	0	0	0	0	0	0	0	0	0	0	0	0	0	0	0	0	0	0	0	0	0	0	0	0	0	0	0	0	0	0	1	0	0	3	0	4	4	0	4	0	0	0	2	0	0	0
Rv0483|AJW51093.1|UB21_02525|ARN05166.1|BJM02_02500|L,D-transpeptidase 5 (LDT 5) (EC 2.3.2.-) (Ldt(Mt5))	0	0	0	0	0	0	0	0	0	0	2	0	0	0	0	0	0	0	0	0	0	0	0	0	0	0	0	0	2	0	2	2	2	0	2	0	0	0	3	2	3	0	0	0	2	0	2	2
Rv0932c|AJW48527.1|UB21_04950|ARN05568.1|BJM02_04915|Phosphate-binding protein PstS 2 (PBP 2) (PstS-2)	2	0	0	0	0	0	0	0	0	0	2	0	2	0	0	0	2	0	0	0	0	0	0	0	0	0	0	0	2	0	0	0	0	0	2	2	2	2	0	4	0	2	0	0	0	2	0	2
Rv1934c|AJW49365.1|UB21_10150|ARN06438.1|BJM02_10095|Putative acyl-CoA dehydrogenase FadE17 (EC 1.3.99.-)	0	0	0	0	16	15	10	9	0	0	1	2	0	0	0	0	10	3	4	6	2	5	13	3	2	1	1	0	1	0	0	0	0	1	0	2	2	3	1	0	1	3	0	2	0	1	1	0
Rv2621c|*|*|ARN07072.1|BJM02_13865|Possible transcriptional regulatory protein	0	0	0	0	0	0	0	2	0	0	0	2	0	0	0	0	0	0	0	0	0	0	0	0	0	0	2	4	0	0	0	0	0	1	2	0	0	2	2	0	0	2	2	2	2	0	0	2
Rv3127|AJW51439.1|UB21_16545|ARN08589.1|BJM02_16515|Uncharacterized protein Rv3127	0	0	0	0	0	0	0	0	2	2	0	0	0	0	0	0	0	0	0	0	0	0	0	0	0	0	0	0	0	0	0	0	0	0	2	4	0	0	0	2	2	4	0	0	2	4	0	0
Rv3211|AJW50440.1|UB21_17035|ARN07588.1|BJM02_17005|Probable ATP-dependent RNA helicase RhlE	2	4	0	2	1	0	1	5	0	1	0	0	0	0	0	0	0	1	0	1	1	2	0	2	2	2	0	0	0	0	1	0	0	0	0	0	4	4	0	0	4	0	0	0	1	1	0	0
Rv3801c|AJW50941.1|UB21_20185|ARN08098.1|BJM02_20135|Long-chain-fatty-acid--AMP ligase FadD32 (FAAL) (EC 6.2.1.-) (Acyl-AMP synthetase)	2	0	0	0	0	0	0	0	0	1	0	0	2	0	0	0	0	0	0	0	0	0	0	2	0	2	0	0	0	0	0	0	1	0	0	0	2	0	0	0	4	0	2	2	0	4	0	0
Rv3859c|AJW50987.1|UB21_20490|ARN08147.1|BJM02_20440|Glutamate synthase [NADPH] large chain (EC 1.4.1.13) (Glutamate synthase subunit alpha) (GLTS alpha chain)	0	2	0	0	0	0	0	0	0	0	2	0	0	0	2	0	0	0	0	0	0	0	0	0	0	0	2	0	0	1	2	0	0	0	0	0	0	4	2	2	2	0	2	0	0	0	2	0
Rv3874|AJW51000.1|UB21_20565|ARN08161.1|BJM02_20515|ESAT-6-like protein EsxB (10 kDa culture filtrate antigen CFP-10) (CFP-10) (Secreted antigenic protein MTSA-10)	2	0	1	0	0	0	0	0	2	0	0	6	0	0	4	0	0	0	0	0	0	1	0	0	0	2	0	1	0	2	4	0	1	1	3	2	2	0	0	5	0	3	1	0	1	2	0	0
*|*|*|3504|BJM02_17735 |hypothetical protein	0	2	0	0	2	1	0	0	4	2	1	1	1	2	0	0	0	1	1	1	0	0	1	1	0	0	1	0	0	3	3	2	0	5	1	1	2	2	0	0	2	3	1	1	0	1	0	1
Rv0020c|AJW47739.1|UB21_00125|ARN04765.1|BJM02_00125|FHA domain-containing protein FhaA	0	0	0	0	0	0	0	4	0	0	2	0	0	0	0	0	0	0	0	0	0	0	0	0	0	0	0	0	0	0	0	0	4	0	0	2	0	0	0	0	0	4	4	4	0	0	1	0
Rv0254c|AJW47926.1|UB21_01350|ARN04960.1|BJM02_01335|Adenosylcobinamide kinase (EC 2.7.1.156) (EC 2.7.7.62) (Adenosylcobinamide-phosphate guanylyltransferase)	0	0	0	0	0	0	0	1	1	0	1	0	0	0	1	0	0	0	0	0	0	0	0	1	1	0	0	1	3	0	3	0	1	0	2	2	1	2	0	0	2	3	3	0	2	0	0	0
Rv0631c|AJW48255.1|UB21_03305|ARN05296.1|BJM02_03280|RecBCD enzyme subunit RecC (EC 3.1.11.5) (Exonuclease V subunit RecC) (ExoV subunit RecC) (Helicase/nuclease RecBCD subunit RecC)	0	0	1	0	0	0	1	0	0	1	0	0	0	0	0	0	0	0	2	0	0	0	0	0	2	0	0	1	0	0	1	0	2	0	0	0	0	0	1	2	3	3	0	0	1	3	0	0
Rv0755c|AJW48373.1|UB21_03985|ARN05414.1|BJM02_03960|Uncharacterized PPE family protein PPE12	2	0	0	0	0	0	0	0	2	0	0	0	0	0	0	0	0	0	0	0	0	0	0	0	1	0	0	0	0	0	0	0	0	0	0	2	0	0	2	2	2	0	1	0	4	0	2	0
Rv1782|AJW49241.1|UB21_09380|ARN06304.1|BJM02_09335|ESX-5 secretion system ATPase EccB5 (EC 3.6.-.-) (ESX conserved component B5) (Type VII secretion system protein EccB5) (T7SS protein EccB5)	0	0	0	4	0	0	0	2	0	2	0	0	0	0	0	0	0	0	0	0	0	0	0	0	0	0	0	0	0	0	0	0	0	0	0	0	2	0	4	5	0	0	0	0	0	0	0	2
Rv2115c|AJW51287.1|UB21_11190|ARN08455.1|BJM02_11135|Proteasome-associated ATPase (AAA ATPase forming ring-shaped complexes) (ARC) (Mycobacterial proteasome ATPase)	2	0	0	0	0	0	0	0	0	0	2	0	0	0	1	0	0	0	0	0	0	0	0	0	0	2	2	0	0	0	0	0	0	0	6	0	0	2	0	2	0	2	2	1	2	2	0	0
Rv2206|AJW49607.1|UB21_11665|ARN06695.1|BJM02_11615|Uncharacterized protein Rv2206	0	0	0	0	0	0	0	0	2	0	0	2	0	0	0	0	0	0	0	0	0	0	1	0	1	0	0	0	1	1	2	0	0	1	3	0	2	0	0	1	4	1	1	2	1	1	0	0
Rv2373c|AJW49744.1|UB21_12570|ARN06846.1|BJM02_12530|Chaperone protein DnaJ 2	0	2	0	0	14	19	12	11	1	9	3	2	0	0	0	0	10	9	5	7	11	8	5	5	0	1	0	1	0	0	0	1	1	2	1	0	2	2	3	1	1	0	0	1	0	1	0	2
Rv2383c|AJW49751.1|UB21_12620|ARN06854.1|BJM02_12580|Phenyloxazoline synthase MbtB (EC 6.3.2.-) (Mycobactin synthetase protein B)	0	0	2	0	0	0	0	0	1	0	0	0	2	0	2	0	0	0	0	0	0	0	0	0	2	0	0	0	0	2	2	2	0	0	0	0	0	0	2	2	2	2	0	0	2	1	0	2
Rv3709c|AJW50862.1|UB21_19685|ARN08019.1|BJM02_19630|Aspartokinase (EC 2.7.2.4) (Aspartate kinase) (ASK)	2	4	1	1	1	0	0	1	2	3	1	1	1	0	1	1	0	2	0	0	2	0	0	0	0	0	2	0	0	2	0	2	2	0	1	3	2	2	1	1	2	2	0	1	0	1	0	1
*|*|*|2955|BJM02_14965 |translation initiation factor IF-2	0	0	0	0	2	0	0	1	2	0	3	2	0	0	0	0	0	0	0	0	0	0	0	0	0	0	0	0	2	0	0	2	1	2	2	0	1	0	4	0	4	0	1	2	0	0	0	0
Rv0080|AJW47789.1|UB21_00435|ARN04818.1|BJM02_00435|Uncharacterized protein Rv0080	0	0	1	0	0	0	0	0	0	0	0	0	0	0	0	0	0	0	0	0	0	0	0	0	0	2	0	0	0	0	0	0	0	2	1	0	1	0	5	2	0	0	0	0	0	0	4	0
Rv0189c|AJW47871.1|UB21_01015|ARN04905.1|BJM02_01000|Dihydroxy-acid dehydratase (DAD) (EC 4.2.1.9)	0	0	0	0	0	0	0	0	0	1	3	0	0	0	0	0	0	0	0	0	0	0	0	0	0	0	1	0	2	0	0	0	0	2	1	0	1	2	0	4	3	1	0	1	0	0	0	0
Rv0587|AJW48216.1|UB21_03070|ARN05255.1|BJM02_03045|Conserved hypothetical integral membrane protein YrbE2A	0	0	0	0	0	0	0	0	0	0	0	1	0	0	0	0	0	0	0	0	0	0	0	0	0	0	0	0	0	1	2	0	0	0	0	1	2	1	1	0	1	2	2	2	0	0	1	0
Rv0752c|AJW48370.1|UB21_03970|ARN05411.1|BJM02_03945|Probable acyl-CoA dehydrogenase FadE9	0	0	0	0	0	0	0	0	0	0	0	0	0	0	0	0	0	0	0	0	1	0	0	2	0	1	1	0	1	2	0	0	0	0	0	0	2	3	1	2	0	1	0	3	0	0	0	0
Rv0873|AJW48478.1|UB21_04635|ARN05515.1|BJM02_04600|Probable acyl-CoA dehydrogenase FadE10 (EC 1.3.-.-)	0	1	0	0	0	0	0	0	0	0	0	0	0	0	0	1	0	0	0	2	0	1	0	0	3	0	0	0	0	0	1	1	0	1	3	0	3	0	2	2	3	0	2	0	0	0	0	0
Rv0934|AJW48529.1|UB21_04960|ARN05569.1|BJM02_04925|Phosphate-binding protein PstS 1 (PBP 1) (PhoS1) (PstS-1) (38-kDa glycolipoprotein) (38-kDa lipoprotein) (P38) (Antigen Ag78) (Protein antigen B) (Pab)	1	0	0	0	0	0	0	0	0	0	0	0	2	0	0	0	0	0	0	2	0	0	0	0	2	1	0	2	1	0	2	1	2	1	1	0	2	2	2	1	1	0	1	2	0	1	0	0
Rv1190|AJW48744.1|UB21_06365|ARN05795.1|BJM02_06335|AB hydrolase-1 domain-containing protein	0	0	0	0	0	0	0	0	0	0	0	0	2	0	0	0	0	0	0	0	0	0	0	0	0	0	0	0	4	2	1	0	1	2	1	0	0	0	0	0	5	1	3	1	1	0	1	0
Rv1345|AJW48880.1|UB21_07195|ARN05934.1|BJM02_07160|Medium/long-chain-fatty-acid--[acyl-carrier-protein] ligase MbtM (EC 6.2.1.20) (EC 6.2.1.47) (Fatty acyl-[acyl-carrier-protein] synthetase) (Fatty acyl-ACP synthetase) (Mycobactin synthetase protein M)	0	0	0	0	0	0	0	0	1	0	0	1	0	0	0	0	0	0	0	2	0	0	0	0	0	0	0	2	0	0	0	0	0	2	2	1	0	4	0	2	0	0	4	0	0	0	2	0
Rv1383|AJW48917.1|UB21_07405|ARN05972.1|BJM02_07370|Carbamoyl-phosphate synthase small chain (EC 6.3.5.5) (Carbamoyl-phosphate synthetase glutamine chain)	0	0	0	0	21	8	15	9	2	3	2	1	0	0	0	0	4	1	4	9	3	6	6	7	0	0	1	0	0	0	1	0	0	0	1	0	1	0	2	1	0	1	1	2	1	1	2	0
Rv1392|AJW51209.1|UB21_07455|ARN08380.1|BJM02_07420|S-adenosylmethionine synthase (AdoMet synthase) (EC 2.5.1.6) (MAT) (Methionine adenosyltransferase)	0	0	0	2	0	0	0	0	0	0	0	0	0	0	0	0	0	0	0	0	0	0	0	0	0	0	0	0	2	2	0	0	0	0	2	0	0	0	0	4	2	0	0	0	2	4	0	0
Rv1449c|*|*|ARN06028.1|BJM02_07715|Transketolase (TK) (EC 2.2.1.1)	2	0	1	2	0	0	0	0	2	0	0	0	0	0	0	0	0	0	0	0	0	0	0	0	0	0	0	0	0	1	0	0	1	0	0	0	0	2	4	2	0	0	2	2	0	0	0	0
Rv1630|AJW49122.1|*|ARN06177.1|BJM02_08585|30S ribosomal protein S1	0	0	0	0	0	0	0	0	2	2	2	0	0	0	0	0	0	0	0	0	0	0	0	0	2	0	2	0	2	0	0	0	0	0	0	2	0	0	2	2	0	0	5	0	2	0	0	1
Rv1925|AJW49357.1|UB21_10105|ARN06430.1|BJM02_10050|Probable acyl-CoA ligase FadD31 (Acyl-CoA synthetase) (Acyl-CoA synthase)	0	0	0	0	2	0	0	0	0	0	4	0	0	3	2	0	1	0	0	0	1	0	0	0	0	3	0	0	0	0	0	0	0	3	2	2	0	4	0	0	0	2	0	0	0	0	4	2
Rv1996|AJW49433.1|UB21_10535|ARN06506.1|BJM02_10480|Universal stress protein Rv1996 (USP Rv1996)	0	0	0	0	0	0	0	0	0	0	0	2	0	0	2	0	0	0	0	0	0	0	0	0	2	0	0	2	0	0	0	0	0	0	0	0	0	4	0	0	4	2	0	0	2	0	0	0
Rv2007c|AJW49440.1|UB21_10595|ARN06515.1|BJM02_10535|Ferredoxin	0	0	2	0	0	0	0	0	0	2	0	0	0	0	0	0	0	0	0	0	0	0	0	0	0	0	2	0	0	0	0	0	0	0	2	2	4	0	0	0	2	0	0	0	2	0	2	2
Rv2567|AJW49902.1|UB21_13630|ARN07020.1|BJM02_13585|Uncharacterized protein Rv2567	4	0	1	0	1	0	0	0	2	0	2	0	15	0	0	0	0	0	0	0	0	0	0	0	2	1	0	0	5	3	2	0	2	0	1	0	1	0	0	0	6	1	0	0	2	1	1	0
Rv2634c|*|*|*|BJM02_13935|Uncharacterized PE-PGRS family protein PE_PGRS46	0	0	1	0	0	0	0	0	1	0	0	0	0	0	0	0	0	0	0	0	0	0	0	0	1	0	0	1	2	0	0	2	1	0	2	0	0	1	0	4	3	0	3	0	1	0	0	0
Rv2930|AJW50201.1|UB21_15495|ARN07339.1|BJM02_15440|Long-chain-fatty-acid--AMP ligase FadD26 (FAAL) (EC 6.2.1.59) (Acyl-AMP synthetase)	0	0	0	0	0	0	0	0	4	0	0	0	0	0	0	0	0	2	0	0	0	0	1	0	0	0	0	2	0	0	0	0	0	0	0	0	0	4	0	0	2	2	0	0	0	2	0	2
Rv3133c|AJW50374.1|UB21_16595|ARN07517.1|BJM02_16565|DNA-binding transcriptional activator DevR/DosR	0	2	2	0	0	0	0	0	2	1	0	2	0	0	0	0	0	0	0	0	0	0	0	0	0	0	0	0	2	0	0	0	4	0	0	2	0	0	0	6	4	0	0	0	2	0	0	0
Rv3365c|AJW50578.1|UB21_17865|ARN07726.1|BJM02_17830|Conserved protein	1	1	1	3	1	0	0	0	1	0	0	1	0	1	1	0	0	0	0	1	0	0	1	1	2	1	1	0	1	0	2	0	0	1	0	0	0	1	2	1	0	3	1	2	2	0	0	0
[truncated: 3,944 more rows]
