# Supplementary material for: Close Related Drug-Resistance Beijing Isolates of Mycobacterium tuberculosis Reveal a Different Transcriptomic Signature in a Murine Disease Progression Model
Source: Int J Mol Sci. 2022 May 5;23(9):5157. doi: 10.3390/ijms23095157 (PMC9100210; doi:10.3390/ijms23095157)
Supplement: Supplementary file 1 [file ijms-23-05157-s001.zip › TABLE S2. INTRA-STRAIN ANALYSIS.ods]

## Sheet: BL323_d14_vs_d3
TABLE S2. INTRA-STRAIN ANALYSIS
ProteinOd_GeneID	ProteinID	Gene_id	logFC	logCPM	F	PValue	FDR	Description	H37Rv
>CP010873.1_AJW47888.1_200_[locus_tag=UB21_01125] [protein=phosphoenolpyruvate carboxykinase] [protein_id=AJW47888.1]_[location=250015..251835] [gbkey=CDS]	AJW47888.1	UB21_01125	4,76438	6,286556	32,74404	1,05E-08	4,08E-05	phosphoenolpyruvate carboxykinase	Rv0211
>CP010873.1_AJW49463.1_1982_[locus_tag=UB21_10745] [protein=antigen] [protein_id=AJW49463.1]_[location=complement(2273161..2273595)] [gbkey=CDS]	AJW49463.1	UB21_10745	4,665928	6,323558	30,57802	3,21E-08	6,22E-05	antigen	Rv2031c
>CP010873.1_AJW49629.1_2174_[locus_tag=UB21_11805] [protein=ribonuclease] [protein_id=AJW49629.1]_[location=complement(2499206..2499625)] [gbkey=CDS]	AJW49629.1	UB21_11805	4,093847	5,689083	27,85223	1,31E-07	1,69E-04	ribonuclease	Rv2231A
>CP010873.1_AJW49303.1_1798_[locus_tag=UB21_09740] [protein=NADH dehydrogenase] [protein_id=AJW49303.1]_[location=complement(2082990..2084381)] [gbkey=CDS]	AJW49303.1	UB21_09740	3,74447	5,738695	24,28152	8,60E-07	8,33E-04	NADH dehydrogenase	Rv1854c
>CP010873.1_AJW48639.1_1049_[locus_tag=UB21_05690] [protein=cysteine dioxygenase] [protein_id=AJW48639.1]_[location=1183943..1184509] [gbkey=CDS]	AJW48639.1	UB21_05690	3,585101	5,748473	22,55484	3,24E-06	2,51E-03	cysteine dioxygenase	Rv1065
>CP010873.1_AJW49845.1_2437_[locus_tag=UB21_13260] [protein=pyruvate dehydrogenase] [protein_id=AJW49845.1]_[location=complement(2802524..2803627)] [gbkey=CDS]	AJW49845.1	UB21_13260	3,463562	5,677991	21,10295	1,23E-05	6,80E-03	pyruvate dehydrogenase	Rv2497c
>CP010873.1_AJW49440.1_1956_[locus_tag=UB21_10595] [protein=ferredoxin] [protein_id=AJW49440.1]_[location=complement(2244392..2244736)] [gbkey=CDS]	AJW49440.1	UB21_10595	3,434509	5,797616	20,80848	1,23E-05	6,80E-03	ferredoxin	Rv2007c
>CP010873.1_AJW48607.1_1012_[locus_tag=UB21_05500] [protein=transcriptional regulator] [protein_id=AJW48607.1]_[location=complement(1154470..1155243)] [gbkey=CDS]	AJW48607.1	UB21_05500	3,434365	5,539757	19,29259	2,40E-05	1,16E-02	transcriptional regulator	Rv1033c
>CP010873.1_AJW49950.1_2555_[locus_tag=UB21_13940] [protein=hypoxic response protein 1] [protein_id=AJW49950.1]_[location=complement(2944066..2944497)] [gbkey=CDS]	AJW49950.1	UB21_13940	3,233595	5,807637	18,70437	4,69E-05	2,02E-02	hypoxic response protein 1	Rv2626c
>CP010873.1_AJW48373.1_737_[locus_tag=UB21_03985] [protein=hypothetical protein] [protein_id=AJW48373.1]_[location=complement(846650..848587)] [gbkey=CDS]	AJW48373.1	UB21_03985	3,092501	5,669055	17,50399	1,81E-04	4,67E-02	hypothetical protein	Rv0755c
>CP010873.1_AJW50052.1_2680_[locus_tag=UB21_14600] [protein=dihydrodipicolinate synthase] [protein_id=AJW50052.1]_[location=complement(3056502..3057404)] [gbkey=CDS]	AJW50052.1	UB21_14600	3,088266	5,612478	17,45962	9,19E-05	3,56E-02	dihydrodipicolinate synthase	Rv2753c
>CP010873.1_AJW48761.1_1194_[locus_tag=UB21_06470] [protein=hypothetical protein] [protein_id=AJW48761.1]_[location=1351664..1351891] [gbkey=CDS]	AJW48761.1	UB21_06470	2,98217	5,591367	16,41583	1,81E-04	4,67E-02	hypothetical protein	Rv1211
>CP010873.1_AJW51156.1_968_[locus_tag=UB21_05260] [protein=FmdB family transcriptional regulator] [protein_id=AJW51156.1]_[location=complement(1104681..1105013)] [gbkey=CDS]	AJW51156.1	UB21_05260	2,971269	5,496508	14,93577	1,81E-04	4,67E-02	FmdB family transcriptional regulator	Rv0991c
>CP010873.1_AJW51073.1_208_[locus_tag=UB21_01170] [protein=esterase] [protein_id=AJW51073.1]_[location=261087..262256] [gbkey=CDS]	AJW51073.1	UB21_01170	2,878059	5,715116	14,65379	1,29E-04	4,55E-02	esterase	Rv0220
>CP010873.1_AJW49528.1_2054_[locus_tag=UB21_11145] [protein=PE family protein] [protein_id=AJW49528.1]_[location=2362092..2362388] [gbkey=CDS]	AJW49528.1	UB21_11145	2,825271	5,868608	14,47697	1,42E-04	4,58E-02	PE family protein	Rv2107

## Sheet: BL323_d28_vs_d3
ProteinID_GeneID	ProteinID	Gene_id	logFC	logCPM	F	PValue	FDR	Description	H37Rv	Columna1	Columna2
>CP010873.1_AJW49463.1_1982_[locus_tag=UB21_10745] [protein=antigen] [protein_id=AJW49463.1]_[location=complement(2273161..2273595)] [gbkey=CDS]	AJW49463.1	UB21_10745	4,801085	6,323558	32,52817	1,18E-08	4,56E-05	antigen	Rv0004
>CP010873.1_AJW47888.1_200_[locus_tag=UB21_01125] [protein=phosphoenolpyruvate carboxykinase] [protein_id=AJW47888.1]_[location=250015..251835] [gbkey=CDS]	AJW47888.1	UB21_01125	4,553195	6,286556	29,83741	4,71E-08	9,12E-05	phosphoenolpyruvate carboxykinase	Rv0211
		RVnc0036a_MTS2823	3,938634	9,688106	12,6091	3,84E-04	4,02E-02		Rv0570
>CP010873.1_AJW48880.1_1326_[locus_tag=UB21_07195] [protein=long-chain fatty acid--CoA ligase] [protein_id=AJW48880.1]_[location=1508166..1509731] [gbkey=CDS]	AJW48880.1	UB21_07195	3,859751	5,713761	25,47969	4,48E-07	4,97E-04	long-chain fatty acid--CoA ligase	Rv0755c
>CP010873.1_AJW49950.1_2555_[locus_tag=UB21_13940] [protein=hypoxic response protein 1] [protein_id=AJW49950.1]_[location=complement(2944066..2944497)] [gbkey=CDS]	AJW49950.1	UB21_13940	3,824701	5,807637	25,21539	5,13E-07	4,97E-04	hypoxic response protein 1	Rv0768
>CP010873.1_AJW49440.1_1956_[locus_tag=UB21_10595] [protein=ferredoxin] [protein_id=AJW49440.1]_[location=complement(2244392..2244736)] [gbkey=CDS]	AJW49440.1	UB21_10595	3,603488	5,797616	22,61483	3,99E-06	3,09E-03	ferredoxin	Rv0824c
>CP010873.1_AJW51246.1_1701_[locus_tag=UB21_09200] [protein=hypothetical protein] [protein_id=AJW51246.1]_[location=1957238..1957522] [gbkey=CDS]	AJW51246.1	UB21_09200	3,481536	5,614943	20,9853	7,67E-06	4,95E-03	hypothetical protein	Rv0922
>CP010873.1_AJW49751.1_2325_[locus_tag=UB21_12620] [protein=peptide synthetase] [protein_id=AJW49751.1]_[location=complement(2664716..2668960)] [gbkey=CDS]	AJW49751.1	UB21_12620	3,338557	5,734725	19,63742	9,37E-06	5,19E-03	peptide synthetase	Rv1006
>CP010873.1_AJW48881.1_1327_[locus_tag=UB21_07200] [protein=acyl-CoA dehydrogenase] [protein_id=AJW48881.1]_[location=1509731..1510891] [gbkey=CDS]	AJW48881.1	UB21_07200	3,30201	5,643119	19,39906	5,51E-05	1,42E-02	acyl-CoA dehydrogenase	Rv1065
>CP010873.1_AJW48917.1_1365_[locus_tag=UB21_07405] [protein=carbamoyl phosphate synthase small subunit] [protein_id=AJW48917.1]_[location=1554856..1555986] [gbkey=CDS]	AJW48917.1	UB21_07405	3,289981	6,97894	17,15141	3,45E-05	1,34E-02	carbamoyl phosphate synthase small subunit	Rv1238
>CP010873.1_AJW50085.1_2717_[locus_tag=UB21_14790] [protein=transposase] [protein_id=AJW50085.1]_[location=complement(3090481..3091860)] [gbkey=CDS]	AJW50085.1	UB21_14790	3,211753	5,618117	18,42469	1,07E-04	1,72E-02	transposase	Rv1345
>CP010873.1_AJW51345.1_2400_[locus_tag=UB21_13030] [protein=2-oxoacid:ferredoxin oxidoreductase subunit beta] [protein_id=AJW51345.1]_[location=complement(2746524..2747615)] [gbkey=CDS]	AJW51345.1	UB21_13030	3,210709	5,601996	18,29895	1,07E-04	1,72E-02	2-oxoacid:ferredoxin oxidoreductase subunit beta	Rv1346
>CP010873.1_AJW49949.1_2554_[locus_tag=UB21_13935] [protein=zinc metalloprotease] [protein_id=AJW49949.1]_[location=complement(2942826..2944007)] [gbkey=CDS]	AJW49949.1	UB21_13935	3,16179	5,543032	17,22826	1,07E-04	1,72E-02	zinc metalloprotease	Rv1383
>CP010873.1_AJW48519.1_903_[locus_tag=UB21_04900] [protein=transposase] [protein_id=AJW48519.1]_[location=1024196..1025848] [gbkey=CDS]	AJW48519.1	UB21_04900	3,132385	5,587055	17,45184	2,07E-04	2,51E-02	transposase	Rv1461
>CP010873.1_AJW48639.1_1049_[locus_tag=UB21_05690] [protein=cysteine dioxygenase] [protein_id=AJW48639.1]_[location=1183943..1184509] [gbkey=CDS]	AJW48639.1	UB21_05690	3,124598	5,748473	17,83756	1,07E-04	1,72E-02	cysteine dioxygenase	Rv1682
>CP010873.1_AJW51278.1_1981_[locus_tag=UB21_10740] [protein=hypothetical protein] [protein_id=AJW51278.1]_[location=complement(2271104..2273101)] [gbkey=CDS]	AJW51278.1	UB21_10740	3,124578	6,340949	19,29208	1,12E-05	5,44E-03	hypothetical protein	Rv1854c
>CP010873.1_AJW48373.1_737_[locus_tag=UB21_03985] [protein=hypothetical protein] [protein_id=AJW48373.1]_[location=complement(846650..848587)] [gbkey=CDS]	AJW48373.1	UB21_03985	3,103359	5,669055	17,73373	1,07E-04	1,72E-02	hypothetical protein	Rv1934c
>CP010873.1_AJW49163.1_1641_[locus_tag=UB21_08890] [protein=coiled-coil structural protein] [protein_id=AJW49163.1]_[location=1897837..1898754] [gbkey=CDS]	AJW49163.1	UB21_08890	3,099998	5,574233	17,21372	1,07E-04	1,72E-02	coiled-coil structural protein	Rv2007c
>CP010873.1_AJW49528.1_2054_[locus_tag=UB21_11145] [protein=PE family protein] [protein_id=AJW49528.1]_[location=2362092..2362388] [gbkey=CDS]	AJW49528.1	UB21_11145	3,052365	5,868608	16,96167	3,82E-05	1,34E-02	PE family protein	Rv2031c
>CP010873.1_AJW50016.1_2635_[locus_tag=UB21_14370] [protein=ribonuclease BN] [protein_id=AJW50016.1]_[location=3010863..3011837] [gbkey=CDS]	AJW50016.1	UB21_14370	3,050444	5,506328	15,73028	1,07E-04	1,72E-02	ribonuclease BN	Rv2107
>CP010873.1_AJW51179.1_1111_[locus_tag=UB21_06035] [protein=2-methylcitrate dehydratase] [protein_id=AJW51179.1]_[location=1250695..1252200] [gbkey=CDS]	AJW51179.1	UB21_06035	3,003534	5,531237	15,84837	2,07E-04	2,51E-02	2-methylcitrate dehydratase	Rv2383c
>CP010873.1_AJW50510.1_3211_[locus_tag=UB21_17440] [protein=L-lysine aminotransferase] [protein_id=AJW50510.1]_[location=complement(3658320..3659669)] [gbkey=CDS]	AJW50510.1	UB21_17440	3,002196	5,589889	16,53943	2,07E-04	2,51E-02	L-lysine aminotransferase	Rv2395A
>CP010873.1_AJW48387.1_751_[locus_tag=UB21_04060] [protein=aldehyde dehydrogenase] [protein_id=AJW48387.1]_[location=859458..860927] [gbkey=CDS]	AJW48387.1	UB21_04060	2,980871	5,498753	14,95564	4,05E-04	3,82E-02	aldehyde dehydrogenase	Rv2623
>CP010873.1_AJW48439.1_810_[locus_tag=UB21_04355] [protein=acyl-ACP desaturase] [protein_id=AJW48439.1]_[location=complement(916277..917293)] [gbkey=CDS]	AJW48439.1	UB21_04355	2,973702	5,914852	17,37936	3,06E-05	1,32E-02	acyl-ACP desaturase	Rv2624c
>CP010873.1_AJW49948.1_2553_[locus_tag=UB21_13930] [protein=universal stress protein] [protein_id=AJW49948.1]_[location=complement(2941993..2942787)] [gbkey=CDS]	AJW49948.1	UB21_13930	2,951424	5,494792	14,68071	4,05E-04	3,82E-02	universal stress protein	Rv2625c
>CP010873.1_AJW47726.1_6_[locus_tag=UB21_00030] [protein=hypothetical protein] [protein_id=AJW47726.1]_[location=5792..6355] [gbkey=CDS]	AJW47726.1	UB21_00030	2,949749	5,594322	16,18988	2,07E-04	2,51E-02	hypothetical protein	Rv2626c
>CP010873.1_AJW48981.1_1440_[locus_tag=UB21_07815] [protein=endonuclease] [protein_id=AJW48981.1]_[location=1646298..1648838] [gbkey=CDS]	AJW48981.1	UB21_07815	2,908634	6,529315	16,30702	5,39E-05	1,42E-02	endonuclease	Rv2707
>CP010873.1_AJW50554.1_3260_[locus_tag=UB21_17690] [protein=hypothetical protein] [protein_id=AJW50554.1]_[location=complement(3711670..3712515)] [gbkey=CDS]	AJW50554.1	UB21_17690	2,881249	5,601658	15,61937	4,05E-04	3,82E-02	hypothetical protein	Rv2791c
>CP010873.1_AJW50371.1_3051_[locus_tag=UB21_16580] [protein=diacylglycerol O-acyltransferase] [protein_id=AJW50371.1]_[location=complement(3481817..3483208)] [gbkey=CDS]	AJW50371.1	UB21_16580	2,873526	5,944019	16,34003	5,30E-05	1,42E-02	diacylglycerol O-acyltransferase	Rv3130c
>CP010873.1_AJW51052.1_88_[locus_tag=UB21_00490] [protein=MTA/SAH nucleosidase] [protein_id=AJW51052.1]_[location=97769..98530] [gbkey=CDS]	AJW51052.1	UB21_00490	2,841856	5,713446	14,37787	1,50E-04	2,23E-02	MTA/SAH nucleosidase	Rv3197
>CP010873.1_AJW49303.1_1798_[locus_tag=UB21_09740] [protein=NADH dehydrogenase] [protein_id=AJW49303.1]_[location=complement(2082990..2084381)] [gbkey=CDS]	AJW49303.1	UB21_09740	2,807922	5,738695	15,08618	4,05E-04	3,82E-02	NADH dehydrogenase	Rv3290c
>CP010873.1_AJW50428.1_3116_[locus_tag=UB21_16945] [protein=ABC transporter ATP-binding protein] [protein_id=AJW50428.1]_[location=3555037..3556380] [gbkey=CDS]	AJW50428.1	UB21_16945	2,800222	5,504779	13,99737	4,05E-04	3,82E-02	ABC transporter ATP-binding protein	Rv3333c
>CP010873.1_AJW48203.1_549_[locus_tag=UB21_02985] [protein=ribonucleoside-diphosphate reductase] [protein_id=AJW48203.1]_[location=659471..661549] [gbkey=CDS]	AJW48203.1	UB21_02985	2,788531	5,548568	14,60471	4,05E-04	3,82E-02	ribonucleoside-diphosphate reductase	Rv3418c
>CP010873.1_AJW50783.1_3528_[locus_tag=UB21_19190] [protein=secretion protein EspA] [protein_id=AJW50783.1]_[location=complement(4054561..4055739)] [gbkey=CDS]	AJW50783.1	UB21_19190	2,771547	6,290619	15,61013	7,79E-05	1,72E-02	secretion protein EspA	Rv3616c
		RVnc0024_mcr7	2,755279	6,048867	17,31448	3,17E-05	1,12E-02		Rv0079
>CP010873.1_AJW49764.1_2338_[locus_tag=UB21_12690] [protein=hypothetical protein] [protein_id=AJW49764.1]_[location=2685351..2685560] [gbkey=CDS]	AJW49764.1	UB21_12690	2,728031	6,027815	16,50518	4,85E-05	1,42E-02	hypothetical protein	Rv0091
>CP010873.1_AJW49947.1_2552_[locus_tag=UB21_13925] [protein=universal stress protein] [protein_id=AJW49947.1]_[location=2941097..2941990] [gbkey=CDS]	AJW49947.1	UB21_13925	2,711893	5,955613	15,39816	8,71E-05	1,72E-02	universal stress protein	Rv1018c
>CP010873.1_AJW51379.1_2638_[locus_tag=UB21_14385] [protein=RNA polymerase sigma factor SigB] [protein_id=AJW51379.1]_[location=3012742..3013713] [gbkey=CDS]	AJW51379.1	UB21_14385	2,639889	6,045219	14,45063	1,44E-04	2,23E-02	RNA polymerase sigma factor SigB	*
>CP010873.1_AJW51180.1_1112_[locus_tag=UB21_06040] [protein=citrate synthase] [protein_id=AJW51180.1]_[location=1252245..1253378] [gbkey=CDS]	AJW51180.1	UB21_06040	2,599251	5,767225	12,81907	3,43E-04	3,82E-02	citrate synthase	Rv1130
>CP010873.1_AJW51048.1_77_[locus_tag=UB21_00430] [protein=hypothetical protein] [protein_id=AJW51048.1]_[location=86293..87114] [gbkey=CDS]	AJW51048.1	UB21_00430	2,535793	5,802003	12,45891	4,16E-04	3,84E-02	hypothetical protein	Rv1131
>CP010873.1_AJW49365.1_1872_[locus_tag=UB21_10150] [protein=acyl-CoA dehydrogenase] [protein_id=AJW49365.1]_[location=complement(2168777..2170006)] [gbkey=CDS]	AJW49365.1	UB21_10150	2,498768	6,298264	13,2068	2,79E-04	3,28E-02	acyl-CoA dehydrogenase	Rv1738
>CP010873.1_AJW48584.1_984_[locus_tag=UB21_05350] [protein=hypothetical protein] [protein_id=AJW48584.1]_[location=1120222..1121925] [gbkey=CDS]	AJW48584.1	UB21_05350	-2,549355	5,908153	13,90015	1,93E-04	2,51E-02	hypothetical protein	Rv2030c
>CP010873.1_AJW50619.1_3336_[locus_tag=UB21_18140] [protein=molecular chaperone GroES] [protein_id=AJW50619.1]_[location=complement(3833027..3833329)] [gbkey=CDS]	AJW50619.1	UB21_18140	-2,610708	5,921974	12,75803	3,91E-04	3,82E-02	molecular chaperone GroES	Rv2454c
>CP010873.1_AJW51162.1_996 [gene=glmU]_[locus_tag=UB21_05410] [protein=bifunctional N-acetylglucosamine-1-phosphate uridyltransferase/glucosamine-1-phosphate acetyltransferase] [protein_id=AJW51162.1]_[location=complement(1133081..1134568)] [gbkey=CDS]	AJW51162.1	UB21_05410	-2,862378	5,511328	15,39576	4,65E-04	4,19E-02	bifunctional N-acetylglucosamine-1-phosphate uridyltransferase/glucosamine-1-phosphate acety	Rv2710
>CP010873.1_AJW48784.1_1220_[locus_tag=UB21_06605] [protein=ABC transporter ATP-binding protein] [protein_id=AJW48784.1]_[location=1378106..1379287] [gbkey=CDS]	AJW48784.1	UB21_06605	-2,987181	5,46092	14,6403	2,05E-04	2,51E-02	ABC transporter ATP-binding protein

## Sheet: BL323_d28_vs_d14
ProteinID_GeneID	ProteinID	Gene_id	logFC	logCPM	F	PValue	FDR	Description	H37Rv
>CP010873.1_AJW48089.1_420 [gene=groEL]_[locus_tag=UB21_02295] [protein=molecular chaperone GroEL] [protein_id=AJW48089.1]_[location=526741..528363] [gbkey=CDS]	AJW48089.1	UB21_02295	-3,08581	6,82154	17,07059	3,60E-05	0,02326892	molecular chaperone GroEL	Rv0440
>CP010873.1_AJW48607.1_1012_[locus_tag=UB21_05500] [protein=transcriptional regulator] [protein_id=AJW48607.1]_[location=complement(1154470..1155243)] [gbkey=CDS]	AJW48607.1	UB21_05500	-3,434365	5,539757	20,71015	8,77E-06	0,006797251	transcriptional regulator	Rv1033c
>CP010873.1_AJW48726.1_1151_[locus_tag=UB21_06240] [protein=nitrate reductase] [protein_id=AJW48726.1]_[location=1290830..1291570] [gbkey=CDS]	AJW48726.1	UB21_06240	-3,816616	5,64963	26,38263	2,80E-07	0,000543247	nitrate reductase	Rv1164
>CP010873.1_AJW49629.1_2174_[locus_tag=UB21_11805] [protein=ribonuclease] [protein_id=AJW49629.1]_[location=complement(2499206..2499625)] [gbkey=CDS]	AJW49629.1	UB21_11805	-4,093847	5,689083	29,90755	4,54E-08	0,000175876	ribonuclease	Rv2231A
>CP010873.1_AJW49751.1_2325_[locus_tag=UB21_12620] [protein=peptide synthetase] [protein_id=AJW49751.1]_[location=complement(2664716..2668960)] [gbkey=CDS]	AJW49751.1	UB21_12620	2,853675	5,734725	15,82371	6,96E-05	0,038498682	peptide synthetase	Rv2383c
>CP010873.1_AJW50376.1_3056_[locus_tag=UB21_16615] [protein=hypothetical protein] [protein_id=AJW50376.1]_[location=complement(3490176..3490508)] [gbkey=CDS]	AJW50376.1	UB21_16615	-3,045467	5,599589	18,32161	8,13E-05	0,03938771	hypothetical protein	Rv3136A
>CP010873.1_AJW50603.1_3320_[locus_tag=UB21_18055] [protein=glycosyl hydrolase] [protein_id=AJW50603.1]_[location=3813393..3815753] [gbkey=CDS]	AJW50603.1	UB21_18055	3,053796	5,49122	16,23747	1,09E-04	0,046895162	glycosyl hydrolase	Rv3401
>CP010873.1_AJW50619.1_3336_[locus_tag=UB21_18140] [protein=molecular chaperone GroES] [protein_id=AJW50619.1]_[location=complement(3833027..3833329)] [gbkey=CDS]	AJW50619.1	UB21_18140	-3,541326	5,921974	24,07156	9,29E-07	0,001200099	molecular chaperone GroES	Rv3418c
>CP010873.1_AJW50778.1_3522_[locus_tag=UB21_19160] [protein=cell division protein FtsH] [protein_id=AJW50778.1]_[location=complement(4049632..4051914)] [gbkey=CDS]	AJW50778.1	UB21_19160	3,484799	5,646052	22,69326	3,05E-06	0,00295862	cell division protein FtsH	Rv3610c

## Sheet: BC_391_d14_vs_d3
ProteinID_GeneID	ProteinID	Gene_id	logFC	logCPM	F	PValue	FDR	Description	H37Rv
		RVnc0024_mcr7	3,840304	5,667728	28,21309	1,73E-06	9,03E-04		Rv0236c
		RVnc0002_Asdes	3,36597	5,340893	18,53617	3,00E-04	4,72E-02		Rv0457c
>CP017596.1_ARN06898.1_2540_[locus_tag=BJM02_12845] [protein=alkyl hydroperoxide reductase] [protein_id=ARN06898.1]_[location=2722321..2722908] [gbkey=CDS]	ARN06898.1	BJM02_12845	3,345743	5,460225	20,89692	2,19E-04	4,77E-02	alkyl hydroperoxide reductase	Rv0509
>CP017596.1_ARN05189.1_525_[locus_tag=BJM02_02645] [protein=glutamyl-tRNA reductase] [protein_id=ARN05189.1]_[location=598541..599947] [gbkey=CDS]	ARN05189.1	BJM02_02645	1,593293	19,728581	87,30406	9,41E-21	3,90E-17	glutamyl-tRNA reductase	Rv0791c
>CP017596.1_ARN08239.1_245_[locus_tag=BJM02_01240] [protein=hypothetical protein] [protein_id=ARN08239.1]_[location=complement(280880..285073)] [gbkey=CDS]	ARN08239.1	BJM02_01240	-2,367552	17,679969	68,84416	1,07E-16	2,22E-13	hypothetical protein	Rv0823c
>CP017596.1_ARN05142.1_469_[locus_tag=BJM02_02365] [protein=peptidase] [protein_id=ARN05142.1]_[location=complement(545710..547731)] [gbkey=CDS]	ARN05142.1	BJM02_02365	-2,524513	6,981821	16,85697	4,03E-05	1,17E-02	peptidase	Rv0832
>CP017596.1_ARN06523.1_2091_[locus_tag=BJM02_10575] [protein=hypothetical protein] [protein_id=ARN06523.1]_[location=complement(2251955..2253211)] [gbkey=CDS]	ARN06523.1	BJM02_10575	-2,884824	5,910414	18,15897	2,03E-05	6,48E-03	hypothetical protein	Rv1046c
>CP017596.1_ARN05923.1_1399_[locus_tag=BJM02_07100] [protein=hypothetical protein] [protein_id=ARN05923.1]_[location=1502231..1503265] [gbkey=CDS]	ARN05923.1	BJM02_07100	-3,325589	7,982107	19,66058	9,25E-06	3,84E-03	hypothetical protein	Rv1180/Rv1181
>CP017596.1_ARN06408.1_1957_[locus_tag=BJM02_09905] [protein=hypothetical protein] [protein_id=ARN06408.1]_[location=2127855..2128163] [gbkey=CDS]	ARN06408.1	BJM02_09905	-3,35419	7,454645	20,05209	7,54E-06	3,47E-03	hypothetical protein	Rv1333
>CP017596.1_ARN05483.1_864_[locus_tag=BJM02_04385] [protein=PE family protein] [protein_id=ARN05483.1]_[location=923509..923922] [gbkey=CDS]	ARN05483.1	BJM02_04385	-3,449262	5,742028	18,94737	1,46E-04	3,37E-02	PE family protein	Rv1405c
>CP017596.1_ARN08119.1_4001_[locus_tag=BJM02_20260] [protein=polyketide synthase] [protein_id=ARN08119.1]_[location=complement(4288491..4294871)] [gbkey=CDS]	ARN08119.1	BJM02_20260	-3,506399	5,817726	19,16671	8,12E-05	1,98E-02	polyketide synthase	Rv1800
>CP017596.1_ARN07921.1_3765_[locus_tag=BJM02_19040] [protein=NDP-hexose 4-ketoreductase] [protein_id=ARN07921.1]_[location=complement(4032830..4035376)] [gbkey=CDS]	ARN07921.1	BJM02_19040	-3,605175	5,683943	21,17627	4,52E-05	1,17E-02	NDP-hexose 4-ketoreductase	Rv1898
>CP017596.1_ARN06320.1_1860_[locus_tag=BJM02_09420] [protein=hypothetical protein] [protein_id=ARN06320.1]_[location=2022393..2024360] [gbkey=CDS]	ARN06320.1	BJM02_09420	-3,610097	7,221804	18,70069	1,53E-05	5,29E-03	hypothetical protein	Rv2015c
>CP017596.1_ARN06851.1_2482_[locus_tag=BJM02_12555] [protein=lysine 6-monooxygenase] [protein_id=ARN06851.1]_[location=complement(2652533..2653828)] [gbkey=CDS]	ARN06851.1	BJM02_12555	-3,690734	7,293612	21,88888	2,89E-06	1,71E-03	lysine 6-monooxygenase	Rv2378c
>CP017596.1_ARN08603.1_3351_[locus_tag=BJM02_16970] [protein=TIGR02569 family protein] [protein_id=ARN08603.1]_[location=complement(3574640..3575494)] [gbkey=CDS]	ARN08603.1	BJM02_16970	-3,718042	5,558746	22,67809	4,52E-05	1,17E-02	TIGR02569 family protein	Rv2428
>CP017596.1_ARN06923.1_2570_[locus_tag=BJM02_12995] [protein=ATP-dependent protease ATP-binding subunit ClpX] [protein_id=ARN06923.1]_[location=complement(2754123..2755403)] [gbkey=CDS]	ARN06923.1	BJM02_12995	-3,768927	5,504738	23,21428	1,41E-05	5,29E-03	ATP-dependent protease ATP-binding subu	Rv2457c
>CP017596.1_ARN05667.1_1092_[locus_tag=BJM02_05540] [protein=hypothetical protein] [protein_id=ARN05667.1]_[location=complement(1166853..1167641)] [gbkey=CDS]	ARN05667.1	BJM02_05540	-3,847241	7,648535	23,72615	1,11E-06	9,21E-04	hypothetical protein	Rv3205c
>CP017596.1_ARN08352.1_1241_[locus_tag=BJM02_06290] [protein=polyketide synthase] [protein_id=ARN08352.1]_[location=1312916..1319134] [gbkey=CDS]	ARN08352.1	BJM02_06290	-3,980128	5,682018	25,9065	4,41E-06	2,29E-03	polyketide synthase	Rv3596c
>CP017596.1_ARN05450.1_822_[locus_tag=BJM02_04155] [protein=LLM class F420-dependent oxidoreductase] [protein_id=ARN05450.1]_[location=complement(883359..884402)] [gbkey=CDS]	ARN05450.1	BJM02_04155	-4,426075	8,95608	22,23517	2,41E-06	1,67E-03	LLM class F420-dependent oxidoreductase	Rv3825c
>CP017596.1_ARN08296.1_855_[locus_tag=BJM02_04320] [protein=tRNA dihydrouridine synthase DusB] [protein_id=ARN08296.1]_[location=complement(915038..916168)] [gbkey=CDS]	ARN08296.1	BJM02_04320	-4,470263	9,243032	26,69808	2,38E-07	2,47E-04	tRNA dihydrouridine synthase DusB
>CP017596.1_ARN05986.1_1475_[locus_tag=BJM02_07485] [protein=hypothetical protein] [protein_id=ARN05986.1]_[location=complement(1581775..1582599)] [gbkey=CDS]	ARN05986.1	BJM02_07485	-4,721941	5,817271	36,48451	2,55E-09	3,53E-06	hypothetical protein

## Sheet: BC_391_d28_vs_d14
ProteinID_GeneID	ProteinID	Gene_id	logFC	logCPM	F	PValue	FDR	Description	H37Rv
>CP017596.1_ARN04750.1_6_[locus_tag=BJM02_00030] [protein=hypothetical protein] [protein_id=ARN04750.1]_[location=5759..6322] [gbkey=CDS]	ARN04750.1	BJM02_00030	-3,606592	5,854395	35,92357	2,06E-09	3,41E-07	hypothetical protein	Rv0004
>CP017596.1_ARN04759.1_17_[locus_tag=BJM02_00095] [protein=serine/threonine protein kinase] [protein_id=ARN04759.1]_[location=complement(16915..18795)] [gbkey=CDS]	ARN04759.1	BJM02_00095	-3,765069	5,665208	34,29034	4,76E-09	6,36E-07	serine/threonine protein kinase	Rv0014c
>CP017596.1_ARN08216.1_95_[locus_tag=BJM02_00490] [protein=nucleosidase] [protein_id=ARN08216.1]_[location=97745..98506] [gbkey=CDS]	ARN08216.1	BJM02_00490	-3,569943	5,343332	24,76789	1,53E-06	1,09E-04	nucleosidase	Rv0091
>CP017596.1_ARN04833.1_106_[locus_tag=BJM02_00545] [protein=hypothetical protein] [protein_id=ARN04833.1]_[location=115772..117757] [gbkey=CDS]	ARN04833.1	BJM02_00545	-2,465017	5,260709	12,56855	1,19E-03	4,01E-02	hypothetical protein	Rv0102
>CP017596.1_ARN04847.1_127_[locus_tag=BJM02_00650] [protein=PPOX class F420-dependent oxidoreductase] [protein_id=ARN04847.1]_[location=complement(145968..146402)] [gbkey=CDS]	ARN04847.1	BJM02_00650	3,4392	6,166289	25,09969	5,45E-07	4,34E-05	PPOX class F420-dependent oxidoreductas	Rv0121c
>CP017596.1_ARN08227.1_157_[locus_tag=BJM02_00800] [protein=PE family protein] [protein_id=ARN08227.1]_[location=complement(175762..177414)] [gbkey=CDS]	ARN08227.1	BJM02_00800	-3,09537	5,327506	19,17824	1,26E-04	5,54E-03	PE family protein	Rv0151c
>CP017596.1_ARN04883.1_173_[locus_tag=BJM02_00880] [protein=long-chain fatty acid--CoA ligase] [protein_id=ARN04883.1]_[location=193214..194878] [gbkey=CDS]	ARN04883.1	BJM02_00880	-1,883826	7,326273	11,53528	6,83E-04	2,51E-02	long-chain fatty acid--CoA ligase	Rv0166
>CP017596.1_ARN04888.1_178_[locus_tag=BJM02_00905] [protein=mammalian cell entry protein] [protein_id=ARN04888.1]_[location=199153..200700] [gbkey=CDS]	ARN04888.1	BJM02_00905	-4,152467	5,586893	39,68655	2,28E-09	3,64E-07	mammalian cell entry protein	Rv0171
>CP017596.1_ARN04891.1_182_[locus_tag=BJM02_00925] [protein=hypothetical protein] [protein_id=ARN04891.1]_[location=204969..205676] [gbkey=CDS]	ARN04891.1	BJM02_00925	2,654663	7,007764	16,72738	4,32E-05	2,08E-03	hypothetical protein	Rv0175
>CP017596.1_ARN08232.1_189_[locus_tag=BJM02_00960] [protein=RNA polymerase subunit sigma-70] [protein_id=ARN08232.1]_[location=complement(211249..212253)] [gbkey=CDS]	ARN08232.1	BJM02_00960	3,892185	7,420042	29,82315	4,74E-08	5,17E-06	RNA polymerase subunit sigma-70 (SigG)	Rv0182c
>CP017596.1_ARN04908.1_200_[locus_tag=BJM02_01015] [protein=hypothetical protein] [protein_id=ARN04908.1]_[location=221785..222885] [gbkey=CDS]	ARN04908.1	BJM02_01015	-3,141982	5,457905	23,0208	4,13E-05	2,04E-03	hypothetical protein	Rv0192
>CP017596.1_ARN04922.1_222_[locus_tag=BJM02_01125] [protein=acyl-CoA synthetase] [protein_id=ARN04922.1]_[location=254389..255906] [gbkey=CDS]	ARN04922.1	BJM02_01125	-3,887317	5,612005	35,01528	5,84E-08	6,05E-06	acyl-CoA synthetase	Rv0214
>CP017596.1_ARN04927.1_228_[locus_tag=BJM02_01155] [protein=esterase] [protein_id=ARN04927.1]_[location=261043..262254] [gbkey=CDS]	ARN04927.1	BJM02_01155	-4,079766	5,645517	38,4088	6,71E-09	8,43E-07	esterase	Rv0220
>CP017596.1_ARN04933.1_234_[locus_tag=BJM02_01185] [protein=hypothetical protein] [protein_id=ARN04933.1]_[location=complement(268065..269795)] [gbkey=CDS]	ARN04933.1	BJM02_01185	-4,249537	6,282803	45,66402	1,41E-11	3,43E-09	hypothetical protein	Rv0226c
>CP017596.1_ARN08239.1_245_[locus_tag=BJM02_01240] [protein=hypothetical protein] [protein_id=ARN08239.1]_[location=complement(280880..285073)] [gbkey=CDS]	ARN08239.1	BJM02_01240	3,533462	17,679969	138,90298	4,75E-32	6,56E-29	hypothetical protein	Rv0236c
>CP017596.1_ARN04978.1_283_[locus_tag=BJM02_01430] [protein=TetR family transcriptional regulator] [protein_id=ARN04978.1]_[location=complement(327937..328557)] [gbkey=CDS]	ARN04978.1	BJM02_01430	3,230273	6,865987	22,73259	1,86E-06	1,29E-04	TetR family transcriptional regulator	Rv0273c
>CP017596.1_ARN04985.1_291_[locus_tag=BJM02_01470] [protein=hypothetical protein] [protein_id=ARN04985.1]_[location=complement(334849..335160)] [gbkey=CDS]	ARN04985.1	BJM02_01470	-3,572117	5,47758	28,94651	1,53E-06	1,09E-04	hypothetical protein	*
>CP017596.1_ARN05029.1_341_[locus_tag=BJM02_01725] [protein=TetR family transcriptional regulator] [protein_id=ARN05029.1]_[location=complement(393637..394377)] [gbkey=CDS]	ARN05029.1	BJM02_01725	-5,508468	8,644461	47,22032	6,36E-12	1,76E-09	TetR family transcriptional regulator	Rv0330c
>CP017596.1_ARN05089.1_409_[locus_tag=BJM02_02065] [protein=D-alanyl-D-alanine carboxypeptidase] [protein_id=ARN05089.1]_[location=complement(475453..476682)] [gbkey=CDS]	ARN05089.1	BJM02_02065	4,125091	5,769533	28,16276	3,74E-07	3,10E-05	D-alanyl-D-alanine carboxypeptidase	Rv0399c
>CP017596.1_ARN05090.1_410_[locus_tag=BJM02_02070] [protein=acyl-CoA dehydrogenase] [protein_id=ARN05090.1]_[location=complement(476692..477879)] [gbkey=CDS]	ARN05090.1	BJM02_02070	3,142449	5,434126	16,56226	5,18E-04	1,97E-02	acyl-CoA dehydrogenase	Rv0400c
>CP017596.1_ARN05173.1_507_[locus_tag=BJM02_02555] [protein=hypothetical protein] [protein_id=ARN05173.1]_[location=complement(581801..582751)] [gbkey=CDS]	ARN05173.1	BJM02_02555	-3,105854	5,492787	21,72965	4,67E-06	3,12E-04	hypothetical protein	Rv0493c
>CP017596.1_ARN05189.1_525_[locus_tag=BJM02_02645] [protein=glutamyl-tRNA reductase] [protein_id=ARN05189.1]_[location=598541..599947] [gbkey=CDS]	ARN05189.1	BJM02_02645	-2,159906	19,728581	154,64704	1,73E-35	3,58E-32	glutamyl-tRNA reductase	Rv0509
>CP017596.1_549_[locus_tag=BJM02_02765] [protein=hypothetical protein] [pseudo=true]_[location=620893..622759] [gbkey=CDS]	549	BJM02_02765	-3,216141	6,472427	29,06562	7,01E-08	7,08E-06	hypothetical protein	*
>CP017596.1_ARN08277.1_632_[locus_tag=BJM02_03185] [protein=hypothetical protein] [protein_id=ARN08277.1]_[location=complement(705119..707686)] [gbkey=CDS]	ARN08277.1	BJM02_03185	-2,626859	5,731314	18,26233	1,93E-05	1,11E-03	hypothetical protein	Rv0613c
>CP017596.1_ARN05313.1_670_[locus_tag=BJM02_03390] [protein=alpha-mannosidase] [protein_id=ARN05313.1]_[location=740876..745072] [gbkey=CDS]	ARN05313.1	BJM02_03390	2,417906	6,807421	15,66222	7,58E-05	3,53E-03	alpha-mannosidase	Rv0648
>CP017596.1_ARN05349.1_711_[locus_tag=BJM02_03595] [protein=FAD-dependent oxidoreductase] [protein_id=ARN05349.1]_[location=786648..787868] [gbkey=CDS]	ARN05349.1	BJM02_03595	2,997423	5,449208	15,42074	8,22E-04	2,89E-02	FAD-dependent oxidoreductase	Rv0688
>CP017596.1_ARN05355.1_717_[locus_tag=BJM02_03625] [protein=mycofactocin radical SAM maturase] [protein_id=ARN05355.1]_[location=790865..792040] [gbkey=CDS]	ARN05355.1	BJM02_03625	-2,658295	5,947477	22,90203	1,71E-06	1,20E-04	mycofactocin radical SAM maturase	Rv0693
>CP017596.1_ARN05444.1_815_[locus_tag=BJM02_04120] [protein=FAD-binding dehydrogenase] [protein_id=ARN05444.1]_[location=877923..879602] [gbkey=CDS]	ARN05444.1	BJM02_04120	3,567394	5,61443	21,48819	5,25E-05	2,47E-03	FAD-binding dehydrogenase	Rv0785
>CP017596.1_ARN05450.1_822_[locus_tag=BJM02_04155] [protein=LLM class F420-dependent oxidoreductase] [protein_id=ARN05450.1]_[location=complement(883359..884402)] [gbkey=CDS]	ARN05450.1	BJM02_04155	6,161633	8,95608	43,1773	5,01E-11	1,09E-08	LLM class F420-dependent oxidoreductase	Rv0791c
>CP017596.1_ARN05473.1_849_[locus_tag=BJM02_04290] [protein=hypothetical protein] [protein_id=ARN05473.1]_[location=complement(908591..909403)] [gbkey=CDS]	ARN05473.1	BJM02_04290	3,121787	5,37039	15,57456	5,18E-04	1,97E-02	hypothetical protein	Rv0817c
>CP017596.1_ARN08296.1_855_[locus_tag=BJM02_04320] [protein=tRNA dihydrouridine synthase DusB] [protein_id=ARN08296.1]_[location=complement(915038..916168)] [gbkey=CDS]	ARN08296.1	BJM02_04320	5,042768	9,243032	33,44197	7,35E-09	8,97E-07	tRNA dihydrouridine synthase DusB	Rv0823c
>CP017596.1_ARN05483.1_864_[locus_tag=BJM02_04385] [protein=PE family protein] [protein_id=ARN05483.1]_[location=923509..923922] [gbkey=CDS]	ARN05483.1	BJM02_04385	3,831653	5,742028	24,36633	3,50E-06	2,38E-04	PE family protein	Rv0832
>CP017596.1_ARN08302.1_881_[locus_tag=BJM02_04470] [protein=hypothetical protein] [protein_id=ARN08302.1]_[location=942544..942936] [gbkey=CDS]	ARN08302.1	BJM02_04470	-6,479405	7,335709	67,72216	1,89E-16	1,31E-13	hypothetical protein	Rv0847
>CP017596.1_ARN05498.1_887_[locus_tag=BJM02_04500] [protein=indolepyruvate decarboxylase] [protein_id=ARN05498.1]_[location=complement(947637..949319)] [gbkey=CDS]	ARN05498.1	BJM02_04500	-2,820471	5,422483	18,78491	3,84E-04	1,52E-02	indolepyruvate decarboxylase	Rv0853c
>CP017596.1_901_[locus_tag=BJM02_04570] [protein=Resuscitation-promoting factor RpfA] [pseudo=true]_[location=complement(962513..963735)] [gbkey=CDS]	901	BJM02_04570	-4,761432	15,019774	74,2719	6,86E-18	5,69E-15	Resuscitation-promoting factor RpfA	Rv0867c
>CP017596.1_ARN05560.1_959_[locus_tag=BJM02_04865] [protein=transposase] [protein_id=ARN05560.1]_[location=1025893..1027545] [gbkey=CDS]	ARN05560.1	BJM02_04865	3,305227	5,402299	17,67747	2,06E-04	8,82E-03	transposase	Rv0922
>CP017596.1_ARN05623.1_1044_[locus_tag=BJM02_05295] [protein=dolichyl-phosphate-mannose--protein mannosyltransferase] [protein_id=ARN05623.1]_[location=complement(1116645..1118213)] [gbkey=CDS]	ARN05623.1	BJM02_05295	-4,84244	6,918596	48,93788	2,65E-12	7,85E-10	dolichyl-phosphate-mannose--protein man	Rv1002c
>CP017596.1_ARN05632.1_1053_[locus_tag=BJM02_05340] [protein=4-(cytidine 5'-diphospho)-2-C-methyl-D-erythritol kinase] [protein_id=ARN05632.1]_[location=1128372..1129328] [gbkey=CDS]	ARN05632.1	BJM02_05340	-6,000285	7,942945	58,77909	1,77E-14	1,05E-11	4-(cytidine 5'-diphospho)-2-C-methyl-D-	Rv1011
>CP017596.1_ARN05639.1_1062_[locus_tag=BJM02_05390] [protein=transcription-repair coupling factor] [protein_id=ARN05639.1]_[location=1137184..1140888] [gbkey=CDS]	ARN05639.1	BJM02_05390	3,429572	7,34017	25,59379	4,22E-07	3,43E-05	transcription-repair coupling factor	Rv1020
>CP017596.1_ARN05667.1_1092_[locus_tag=BJM02_05540] [protein=hypothetical protein] [protein_id=ARN05667.1]_[location=complement(1166853..1167641)] [gbkey=CDS]	ARN05667.1	BJM02_05540	4,33696	7,648535	31,14205	2,40E-08	2,77E-06	hypothetical protein	Rv1046c
>CP017596.1_ARN05711.1_1146_[locus_tag=BJM02_05815] [protein=acyl-ACP desaturase] [protein_id=ARN05711.1]_[location=1219753..1220580] [gbkey=CDS]	ARN05711.1	BJM02_05815	3,341847	5,520212	18,90423	2,06E-04	8,82E-03	acyl-ACP desaturase	Rv1094
>CP017596.1_ARN08341.1_1151_[locus_tag=BJM02_05840] [protein=fructose-bisphosphatase, class II] [protein_id=ARN08341.1]_[location=complement(1225390..1226376)] [gbkey=CDS]	ARN08341.1	BJM02_05840	3,116743	5,626997	16,58123	5,18E-04	1,97E-02	fructose-bisphosphatase, class II	Rv1099c
>CP017596.1_ARN08352.1_1241_[locus_tag=BJM02_06290] [protein=polyketide synthase] [protein_id=ARN08352.1]_[location=1312916..1319134] [gbkey=CDS]	ARN08352.1	BJM02_06290	3,1999	5,682018	17,20561	3,26E-04	1,33E-02	polyketide synthase	Rv1180/Rv1181
>CP017596.1_ARN08366.1_1305_[locus_tag=BJM02_06610] [protein=hypothetical protein] [protein_id=ARN08366.1]_[location=1385906..1386766] [gbkey=CDS]	ARN08366.1	BJM02_06610	4,260357	7,155524	34,82066	3,62E-09	5,00E-07	hypothetical protein	Rv1244
>CP017596.1_ARN05857.1_1325_[locus_tag=BJM02_06710] [protein=amidase] [protein_id=ARN05857.1]_[location=1409481..1410869] [gbkey=CDS]	ARN05857.1	BJM02_06710	-5,659707	6,971139	57,10421	4,15E-14	2,15E-11	amidase	Rv1263
>CP017596.1_ARN05870.1_1341_[locus_tag=BJM02_06790] [protein=hypothetical protein] [protein_id=ARN05870.1]_[location=complement(1430722..1432359)] [gbkey=CDS]	ARN05870.1	BJM02_06790	4,185108	6,947319	33,06964	8,91E-09	1,05E-06	hypothetical protein	Rv1280c
>CP017596.1_ARN05923.1_1399_[locus_tag=BJM02_07100] [protein=hypothetical protein] [protein_id=ARN05923.1]_[location=1502231..1503265] [gbkey=CDS]	ARN05923.1	BJM02_07100	3,993638	7,982107	28,89875	7,64E-08	7,54E-06	hypothetical protein	Rv1333
>CP017596.1_ARN05972.1_1452_[locus_tag=BJM02_07370] [protein=carbamoyl phosphate synthase small subunit] [protein_id=ARN05972.1]_[location=1556604..1557734] [gbkey=CDS]	ARN05972.1	BJM02_07370	-3,880945	6,417204	35,49228	2,57E-09	3,94E-07	carbamoyl phosphate synthase small subu	Rv1383
>CP017596.1_1466_[locus_tag=BJM02_07440] [protein=hypothetical protein] [pseudo=true]_[location=complement(1572760..1574485)] [gbkey=CDS]	1466	BJM02_07440	-2,334758	5,808645	16,39839	5,14E-05	2,45E-03	hypothetical protein	*
>CP017596.1_ARN05986.1_1475_[locus_tag=BJM02_07485] [protein=hypothetical protein] [protein_id=ARN05986.1]_[location=complement(1581775..1582599)] [gbkey=CDS]	ARN05986.1	BJM02_07485	3,571515	5,817271	20,51425	3,34E-05	1,84E-03	hypothetical protein	Rv1405c
>CP017596.1_ARN06020.1_1512_[locus_tag=BJM02_07670] [protein=hypothetical protein] [protein_id=ARN06020.1]_[location=complement(1618860..1620317)] [gbkey=CDS]	ARN06020.1	BJM02_07670	2,517415	7,67038	14,78738	1,20E-04	5,48E-03	hypothetical protein	*
>CP017596.1_1523_[locus_tag=BJM02_07725] [protein=hypothetical protein] [pseudo=true]_[location=complement(1631274..1635453)] [gbkey=CDS]	1523	BJM02_07725	-6,102179	14,132662	79,74145	4,31E-19	4,46E-16	hypothetical protein	*
>CP017596.1_1525_[locus_tag=BJM02_07735] [protein=PE family protein] [pseudo=true]_[location=complement(1636830..1639223)] [gbkey=CDS]	1525	BJM02_07735	-5,344007	12,605453	44,5071	2,54E-11	5,85E-09	PE family protein	*
>CP017596.1_ARN06062.1_1561_[locus_tag=BJM02_07915] [protein=ferrochelatase] [protein_id=ARN06062.1]_[location=1677421..1678455] [gbkey=CDS]	ARN06062.1	BJM02_07915	-2,859092	5,265585	14,77095	1,19E-03	4,01E-02	ferrochelatase	Rv1485
>CP017596.1_ARN06076.1_1578_[locus_tag=BJM02_08000] [protein=glycosyl transferase] [protein_id=ARN06076.1]_[location=1693254..1694282] [gbkey=CDS]	ARN06076.1	BJM02_08000	-5,04952	5,987054	56,18559	6,62E-14	2,88E-11	glycosyl transferase	Rv1500
>CP017596.1_ARN06144.1_1659_[locus_tag=BJM02_08405] [protein=L-aspartate oxidase] [protein_id=ARN06144.1]_[location=1788957..1790543] [gbkey=CDS]	ARN06144.1	BJM02_08405	-3,106396	6,142993	29,42321	5,83E-08	6,05E-06	L-aspartate oxidase	Rv1595
>CP017596.1_ARN06187.1_1708_[locus_tag=BJM02_08655] [protein=50S ribosomal protein L20] [protein_id=ARN06187.1]_[location=1846339..1846728] [gbkey=CDS]	ARN06187.1	BJM02_08655	-3,191822	5,353741	21,29493	4,13E-05	2,04E-03	50S ribosomal protein L20	Rv1643
>CP017596.1_ARN06202.1_1724_[locus_tag=BJM02_08735] [protein=argininosuccinate lyase] [protein_id=ARN06202.1]_[location=1865814..1867226] [gbkey=CDS]	ARN06202.1	BJM02_08735	-2,852967	5,521299	19,39111	3,84E-04	1,52E-02	argininosuccinate lyase	Rv1659
>CP017596.1_ARN06206.1_1729_[locus_tag=BJM02_08760] [protein=polyketide synthase] [protein_id=ARN06206.1]_[location=1881201..1884254] [gbkey=CDS]	ARN06206.1	BJM02_08760	-2,020502	5,602526	11,4736	7,06E-04	2,54E-02	polyketide synthase	Rv1664
>CP017596.1_ARN06216.1_1740_[locus_tag=BJM02_08815] [protein=hypothetical protein] [protein_id=ARN06216.1]_[location=1894373..1894936] [gbkey=CDS]	ARN06216.1	BJM02_08815	3,499813	6,969061	26,1088	3,23E-07	2,79E-05	hypothetical protein	Rv1676
>CP017596.1_ARN06220.1_1745_[locus_tag=BJM02_08840] [protein=radical SAM protein] [protein_id=ARN06220.1]_[location=1898432..1899427] [gbkey=CDS]	ARN06220.1	BJM02_08840	-2,640542	5,276472	13,98497	1,19E-03	4,01E-02	radical SAM protein	Rv1681
>CP017596.1_ARN06267.1_1799_[locus_tag=BJM02_09115] [protein=succinic semialdehyde dehydrogenase] [protein_id=ARN06267.1]_[location=1951013..1952569] [gbkey=CDS]	ARN06267.1	BJM02_09115	2,930031	5,398793	14,42307	1,31E-03	4,31E-02	succinic semialdehyde dehydrogenase	Rv1731
>CP017596.1_ARN06320.1_1860_[locus_tag=BJM02_09420] [protein=hypothetical protein] [protein_id=ARN06320.1]_[location=2022393..2024360] [gbkey=CDS]	ARN06320.1	BJM02_09420	4,964856	7,221804	39,25838	3,72E-10	7,01E-08	hypothetical protein	Rv1800
>CP017596.1_1863_[locus_tag=BJM02_09435] [protein=PE family protein] [pseudo=true]_[location=complement(2027863..2029819)] [gbkey=CDS]	1863	BJM02_09435	-3,040238	5,335439	19,13802	1,26E-04	5,54E-03	PE family protein	*
>CP017596.1_ARN06387.1_1931_[locus_tag=BJM02_09775] [protein=alpha-hydroxy-acid oxidizing enzyme] [protein_id=ARN06387.1]_[location=complement(2104797..2106041)] [gbkey=CDS]	ARN06387.1	BJM02_09775	3,241834	5,67968	17,58144	3,26E-04	1,33E-02	alpha-hydroxy-acid oxidizing enzyme	Rv1872c
>CP017596.1_ARN06408.1_1957_[locus_tag=BJM02_09905] [protein=hypothetical protein] [protein_id=ARN06408.1]_[location=2127855..2128163] [gbkey=CDS]	ARN06408.1	BJM02_09905	3,82873	7,454645	27,04638	1,99E-07	1,79E-05	hypothetical protein	Rv1898
>CP017596.1_ARN06425.1_1981_[locus_tag=BJM02_10025] [protein=hypothetical protein] [protein_id=ARN06425.1]_[location=2157265..2158128] [gbkey=CDS]	ARN06425.1	BJM02_10025	-3,185189	5,394824	22,48544	4,13E-05	2,04E-03	hypothetical protein	Rv1920
>CP017596.1_ARN06438.1_1995_[locus_tag=BJM02_10095] [protein=acyl-CoA dehydrogenase] [protein_id=ARN06438.1]_[location=complement(2170601..2171830)] [gbkey=CDS]	ARN06438.1	BJM02_10095	-3,083617	6,446122	26,84801	2,20E-07	1,94E-05	acyl-CoA dehydrogenase	Rv1934c
>CP017596.1_2055_[locus_tag=BJM02_10395] [protein=hypothetical protein] [pseudo=true]_[location=2216381..2218060] [gbkey=CDS]	2055	BJM02_10395	-2,473059	6,739347	17,08785	3,57E-05	1,90E-03	hypothetical protein	Rv1983
>CP017596.1_ARN06504.1_2069_[locus_tag=BJM02_10465] [protein=hypothetical protein] [protein_id=ARN06504.1]_[location=complement(2227443..2227715)] [gbkey=CDS]	ARN06504.1	BJM02_10465	3,063658	9,142824	17,18582	3,39E-05	1,85E-03	hypothetical protein	Rv1993c
>CP017596.1_ARN06513.1_2081_[locus_tag=BJM02_10525] [protein=universal stress protein UspA] [protein_id=ARN06513.1]_[location=complement(2241135..2242022)] [gbkey=CDS]	ARN06513.1	BJM02_10525	2,981937	5,300742	12,90578	1,31E-03	4,31E-02	universal stress protein UspA	Rv2005c
>CP017596.1_ARN06529.1_2099_[locus_tag=BJM02_10615] [protein=hypothetical protein] [protein_id=ARN06529.1]_[location=complement(2257918..2258217)] [gbkey=CDS]	ARN06529.1	BJM02_10615	4,006982	6,592016	29,84709	4,68E-08	5,17E-06	hypothetical protein	Rv2020c
>CP017596.1_ARN08445.1_2112_[locus_tag=BJM02_10680] [protein=hypothetical protein] [protein_id=ARN08445.1]_[location=complement(2272937..2274934)] [gbkey=CDS]	ARN08445.1	BJM02_10680	4,090401	6,013957	25,3556	9,13E-07	7,01E-05	hypothetical protein	Rv2030c
>CP017596.1_2130_[locus_tag=BJM02_10770] [protein=polyketide synthase] [pseudo=true]_[location=complement(2291027..2303481)] [gbkey=CDS]	2130	BJM02_10770	3,050661	5,758725	18,28859	2,87E-05	1,63E-03	polyketide synthase	*
>CP017596.1_ARN06569.1_2148_[locus_tag=BJM02_10860] [protein=precorrin-3B synthase] [protein_id=ARN06569.1]_[location=2317946..2319037] [gbkey=CDS]	ARN06569.1	BJM02_10860	-2,267186	5,567022	12,99083	3,50E-04	1,41E-02	precorrin-3B synthase	Rv2064
>CP017596.1_ARN06585.1_2168_[locus_tag=BJM02_10960] [protein=hypothetical protein] [protein_id=ARN06585.1]_[location=2335206..2337371] [gbkey=CDS]	ARN06585.1	BJM02_10960	3,179938	5,38679	16,37441	3,26E-04	1,33E-02	hypothetical protein	Rv2082
>CP017596.1_ARN08452.1_2175_[locus_tag=BJM02_10995] [protein=peptidase M24 family protein] [protein_id=ARN08452.1]_[location=complement(2342705..2343832)] [gbkey=CDS]	ARN08452.1	BJM02_10995	-2,333427	5,49874	12,69957	5,56E-04	2,08E-02	peptidase M24 family protein	Rv2089c
>CP017596.1_ARN06649.1_2243_[locus_tag=BJM02_11340] [protein=cell division protein FtsQ] [protein_id=ARN06649.1]_[location=complement(2406214..2407158)] [gbkey=CDS]	ARN06649.1	BJM02_11340	-2,580108	5,317091	14,71941	1,19E-03	4,01E-02	cell division protein FtsQ	Rv2151c
>CP017596.1_ARN06656.1_2251_[locus_tag=BJM02_11380] [protein=hypothetical protein] [protein_id=ARN06656.1]_[location=complement(2417148..2418182)] [gbkey=CDS]	ARN06656.1	BJM02_11380	2,059884	7,161614	11,14029	8,45E-04	2,94E-02	hypothetical protein	Rv2159c
>CP017596.1_2254_[locus_tag=BJM02_11395] [protein=hypothetical protein] [pseudo=true]_[location=complement(2419761..2421356)] [gbkey=CDS]	2254	BJM02_11395	-6,750713	9,000615	56,09377	6,94E-14	2,88E-11	hypothetical protein	*
>CP017596.1_ARN06694.1_2297_[locus_tag=BJM02_11610] [protein=hypothetical protein] [protein_id=ARN06694.1]_[location=complement(2464492..2465637)] [gbkey=CDS]	ARN06694.1	BJM02_11610	3,000866	6,18262	18,51007	1,69E-05	1,00E-03	hypothetical protein	Rv2205c
>CP017596.1_ARN06724.1_2331_[locus_tag=BJM02_11785] [protein=cobalamin biosynthesis protein] [protein_id=ARN06724.1]_[location=complement(2503539..2504480)] [gbkey=CDS]	ARN06724.1	BJM02_11785	2,42478	5,862323	12,90243	3,28E-04	1,33E-02	cobalamin biosynthesis protein	Rv2236c
>CP017596.1_ARN06733.1_2342_[locus_tag=BJM02_11845] [protein=beta-ketoacyl-[acyl-carrier-protein] synthase II] [protein_id=ARN06733.1]_[location=2514564..2515817] [gbkey=CDS]	ARN06733.1	BJM02_11845	-2,544894	6,073226	20,42663	6,20E-06	4,02E-04	beta-ketoacyl-[acyl-carrier-protein] sy	Rv2246
>CP017596.1_ARN06734.1_2343_[locus_tag=BJM02_11850] [protein=propionyl-CoA carboxylase subunit beta] [protein_id=ARN06734.1]_[location=2515848..2517269] [gbkey=CDS]	ARN06734.1	BJM02_11850	2,995225	5,448808	15,40649	8,22E-04	2,89E-02	propionyl-CoA carboxylase subunit beta	Rv2247
>CP017596.1_ARN06770.1_2383_[locus_tag=BJM02_12050] [protein=CDP-diacylglycerol diphosphatase] [protein_id=ARN06770.1]_[location=2554660..2555442] [gbkey=CDS]	ARN06770.1	BJM02_12050	-2,530663	7,205011	19,98462	7,81E-06	4,98E-04	CDP-diacylglycerol diphosphatase	Rv2289
>CP017596.1_ARN06790.1_2410_[locus_tag=BJM02_12190] [protein=hypothetical protein] [protein_id=ARN06790.1]_[location=2576799..2577395] [gbkey=CDS]	ARN06790.1	BJM02_12190	3,941856	8,323141	28,05405	1,18E-07	1,09E-05	hypothetical protein	Rv2311
>CP017596.1_ARN06843.1_2474_[locus_tag=BJM02_12515] [protein=hypothetical protein] [protein_id=ARN06843.1]_[location=complement(2646370..2647683)] [gbkey=CDS]	ARN06843.1	BJM02_12515	2,692724	7,474252	17,22598	3,32E-05	1,84E-03	hypothetical protein	Rv2370c
>CP017596.1_ARN06846.1_2477_[locus_tag=BJM02_12530] [protein=molecular chaperone DnaJ] [protein_id=ARN06846.1]_[location=complement(2648964..2650112)] [gbkey=CDS]	ARN06846.1	BJM02_12530	-3,58817	6,639706	33,82614	6,04E-09	7,82E-07	molecular chaperone DnaJ	Rv2373c
>CP017596.1_ARN06851.1_2482_[locus_tag=BJM02_12555] [protein=lysine 6-monooxygenase] [protein_id=ARN06851.1]_[location=complement(2652533..2653828)] [gbkey=CDS]	ARN06851.1	BJM02_12555	4,51926	7,293612	34,82206	3,62E-09	5,00E-07	lysine 6-monooxygenase	Rv2378c
>CP017596.1_ARN06853.1_2484_[locus_tag=BJM02_12565] [protein=non-ribosomal peptide synthetase] [protein_id=ARN06853.1]_[location=complement(2658192..2663387)] [gbkey=CDS]	ARN06853.1	BJM02_12565	3,051384	6,56464	20,50952	5,94E-06	3,91E-04	non-ribosomal peptide synthetase	Rv2380c
>CP017596.1_ARN06867.1_2501_[locus_tag=BJM02_12650] [protein=hypothetical protein] [protein_id=ARN06867.1]_[location=2688357..2688566] [gbkey=CDS]	ARN06867.1	BJM02_12650	3,068967	5,575041	16,31419	5,18E-04	1,97E-02	hypothetical protein	Rv2395A
>CP017596.1_2503_[locus_tag=BJM02_12660] [protein=PE family protein] [pseudo=true]_[location=2688926..2690010] [gbkey=CDS]	2503	BJM02_12660	-6,866256	11,23653	54,47966	1,58E-13	5,03E-11	PE family protein	Rv2396
>CP017596.1_ARN08497.1_2536_[locus_tag=BJM02_12825] [protein=ATPase] [protein_id=ARN08497.1]_[location=complement(2719456..2720331)] [gbkey=CDS]	ARN08497.1	BJM02_12825	-5,267272	6,571283	55,15052	1,12E-13	3,87E-11	ATPase	Rv2426c
>CP017596.1_ARN06931.1_2580_[locus_tag=BJM02_13055] [protein=aminopeptidase N] [protein_id=ARN06931.1]_[location=2764901..2767486] [gbkey=CDS]	ARN06931.1	BJM02_13055	3,456891	6,272694	24,37552	7,93E-07	6,20E-05	aminopeptidase N	Rv2467
>CP017596.1_ARN06955.1_2610_[locus_tag=BJM02_13210] [protein=pyruvate dehydrogenase (acetyl-transferring) E1 component subunit alpha] [protein_id=ARN06955.1]_[location=complement(2805549..2806652)] [gbkey=CDS]	ARN06955.1	BJM02_13210	3,277852	5,339893	16,0577	2,06E-04	8,82E-03	pyruvate dehydrogenase (acetyl-transfer	Rv2497c
>CP017596.1_ARN07019.1_2682_[locus_tag=BJM02_13580] [protein=transglutaminase] [protein_id=ARN07019.1]_[location=2881004..2884345] [gbkey=CDS]	ARN07019.1	BJM02_13580	-3,892575	5,99493	34,86878	3,53E-09	5,00E-07	transglutaminase	Rv2566
>CP017596.1_ARN07041.1_2706_[locus_tag=BJM02_13700] [protein=oxidoreductase] [protein_id=ARN07041.1]_[location=2912421..2915927] [gbkey=CDS]	ARN07041.1	BJM02_13700	2,109787	6,107556	11,92282	5,55E-04	2,08E-02	oxidoreductase	Rv2590
>CP017596.1_2707_[locus_tag=BJM02_13705] [protein=hypothetical protein] [pseudo=true]_[location=2916101..2917730] [gbkey=CDS]	2707	BJM02_13705	-2,918983	5,505355	19,27628	3,57E-05	1,90E-03	hypothetical protein	*
>CP017596.1_ARN07173.1_2860_[locus_tag=BJM02_14490] [protein=hypothetical protein] [protein_id=ARN07173.1]_[location=3049350..3049754] [gbkey=CDS]	ARN07173.1	BJM02_14490	-3,357402	5,355132	23,08281	1,37E-05	8,23E-04	hypothetical protein	Rv2742A
>CP017596.1_3007_[locus_tag=BJM02_15225] [protein=amidase] [pseudo=true]_[location=complement(3183995..3185418)] [gbkey=CDS]	3007	BJM02_15225	-7,078	10,055721	55,21859	1,08E-13	3,87E-11	amidase	Rv2888c
>CP017596.1_ARN07353.1_3072_[locus_tag=BJM02_15550] [protein=enoyl-ACP reductase] [protein_id=ARN07353.1]_[location=3292871..3294127] [gbkey=CDS]	ARN07353.1	BJM02_15550	2,554639	11,417665	11,53911	6,82E-04	2,51E-02	enoyl-ACP reductase	Rv2953
>CP017596.1_ARN07366.1_3091_[locus_tag=BJM02_15645] [protein=lipase] [protein_id=ARN07366.1]_[location=complement(3312167..3313297)] [gbkey=CDS]	ARN07366.1	BJM02_15645	-3,056269	5,511327	21,16114	1,29E-05	8,05E-04	lipase	Rv2970c
>CP017596.1_ARN07519.1_3274_[locus_tag=BJM02_16580] [protein=hypothetical protein] [protein_id=ARN07519.1]_[location=3494020..3495162] [gbkey=CDS]	ARN07519.1	BJM02_16580	2,267422	5,716356	11,48678	7,01E-04	2,54E-02	hypothetical protein	Rv3136
>CP017596.1_ARN07548.1_3307_[locus_tag=BJM02_16745] [protein=TetR family transcriptional regulator] [protein_id=ARN07548.1]_[location=complement(3529803..3530429)] [gbkey=CDS]	ARN07548.1	BJM02_16745	-2,516012	5,743899	19,01052	1,30E-05	8,05E-04	TetR family transcriptional regulator	Rv3167c
>CP017596.1_ARN07580.1_3347_[locus_tag=BJM02_16950] [protein=ATP-dependent DNA helicase] [protein_id=ARN07580.1]_[location=complement(3570047..3573214)] [gbkey=CDS]	ARN07580.1	BJM02_16950	3,121048	5,530152	16,62126	8,22E-04	2,89E-02	ATP-dependent DNA helicase	Rv3202c
>CP017596.1_ARN07673.1_3457_[locus_tag=BJM02_17500] [protein=phosphomannomutase] [protein_id=ARN07673.1]_[location=3687806..3689410] [gbkey=CDS]	ARN07673.1	BJM02_17500	-3,824659	6,55265	39,56056	3,19E-10	6,29E-08	phosphomannomutase	Rv3308
>CP017596.1_ARN07701.1_3489_[locus_tag=BJM02_17660] [protein=hypothetical protein] [protein_id=ARN07701.1]_[location=complement(3716681..3717526)] [gbkey=CDS]	ARN07701.1	BJM02_17660	-3,142188	5,485084	23,20103	4,13E-05	2,04E-03	hypothetical protein	Rv3333c
>CP017596.1_3525_[locus_tag=BJM02_17840] [protein=PE family protein] [pseudo=true]_[location=3778967..3780743] [gbkey=CDS]	3525	BJM02_17840	-4,109842	7,326351	40,46159	2,01E-10	4,17E-08	PE family protein	*
>CP017596.1_ARN07798.1_3614_[locus_tag=BJM02_18285] [protein=type VII secretion integral membrane protein EccD] [protein_id=ARN07798.1]_[location=3872805..3874208] [gbkey=CDS]	ARN07798.1	BJM02_18285	-8,056676	15,440334	182,87379	1,20E-41	4,96E-38	type VII secretion integral membrane pr	Rv3448
>CP017596.1_3671_[locus_tag=BJM02_18570] [protein=PE-PGRS family protein] [pseudo=true]_[location=3934152..3935282] [gbkey=CDS]	3671	BJM02_18570	-4,16583	9,488278	28,24498	1,07E-07	1,01E-05	PE-PGRS family protein	*
>CP017596.1_3672_[locus_tag=BJM02_18575] [protein=hypothetical protein] [pseudo=true]_[location=3935318..3936114] [gbkey=CDS]	3672	BJM02_18575	-3,107634	5,390999	21,69973	4,13E-05	2,04E-03	hypothetical protein	*
>CP017596.1_ARN07879.1_3717_[locus_tag=BJM02_18800] [protein=short chain dehydrogenase] [protein_id=ARN07879.1]_[location=complement(3982994..3983773)] [gbkey=CDS]	ARN07879.1	BJM02_18800	2,456953	5,772705	13,52593	2,35E-04	9,95E-03	short chain dehydrogenase	Rv3549c
>CP017596.1_ARN07917.1_3759_[locus_tag=BJM02_19010] [protein=PE family protein] [protein_id=ARN07917.1]_[location=complement(4026079..4027833)] [gbkey=CDS]	ARN07917.1	BJM02_19010	-3,867353	10,052548	24,01953	9,54E-07	7,19E-05	PE family protein	*
>CP017596.1_3764_[locus_tag=BJM02_19035] [protein=PE family protein] [pseudo=true]_[location=complement(4031406..4032722)] [gbkey=CDS]	3764	BJM02_19035	-2,358431	5,855368	16,7316	4,31E-05	2,08E-03	PE family protein	*
>CP017596.1_ARN07921.1_3765_[locus_tag=BJM02_19040] [protein=NDP-hexose 4-ketoreductase] [protein_id=ARN07921.1]_[location=complement(4032830..4035376)] [gbkey=CDS]	ARN07921.1	BJM02_19040	2,934705	5,683943	14,53444	1,31E-03	4,31E-02	NDP-hexose 4-ketoreductase	Rv3596c
>CP017596.1_ARN07962.1_3813_[locus_tag=BJM02_19285] [protein=DNA polymerase III subunit delta'] [protein_id=ARN07962.1]_[location=complement(4076522..4077730)] [gbkey=CDS]	ARN07962.1	BJM02_19285	-3,095197	6,136073	28,25874	1,06E-07	1,01E-05	DNA polymerase III subunit delta'	Rv3644c
>CP017596.1_ARN08661.1_3818_[locus_tag=BJM02_19310] [protein=DEAD/DEAH box helicase] [protein_id=ARN08661.1]_[location=4083787..4086102] [gbkey=CDS]	ARN08661.1	BJM02_19310	-2,989939	6,289064	25,89064	3,62E-07	3,06E-05	DEAD/DEAH box helicase	Rv3649
>CP017596.1_ARN07999.1_3859_[locus_tag=BJM02_19520] [protein=hypothetical protein] [protein_id=ARN07999.1]_[location=4125709..4127064] [gbkey=CDS]	ARN07999.1	BJM02_19520	-4,57055	6,194364	46,54949	8,96E-12	2,32E-09	hypothetical protein	Rv3689
>CP017596.1_ARN08037.1_3901_[locus_tag=BJM02_19740] [protein=radical SAM protein] [protein_id=ARN08037.1]_[location=4173604..4175970] [gbkey=CDS]	ARN08037.1	BJM02_19740	2,803887	12,97239	16,80645	4,14E-05	2,04E-03	radical SAM protein	Rv3729
>CP017596.1_ARN08092.1_3967_[locus_tag=BJM02_20090] [protein=arabinofuranosyltransferase] [protein_id=ARN08092.1]_[location=4233233..4235125] [gbkey=CDS]	ARN08092.1	BJM02_20090	2,474004	6,34655	15,25732	9,38E-05	4,32E-03	arabinofuranosyltransferase	Rv3792
>CP017596.1_3968_[locus_tag=BJM02_20095] [protein=arabinosyltransferase] [pseudo=true]_[location=4235125..4238411] [gbkey=CDS]	3968	BJM02_20095	-2,800786	6,269807	23,41011	1,31E-06	9,70E-05	arabinosyltransferase	Rv3793
>CP017596.1_3970_[locus_tag=BJM02_20105] [protein=arabinosyltransferase] [pseudo=true]_[location=4241815..4245076] [gbkey=CDS]	3970	BJM02_20105	-3,104216	5,391889	21,21295	1,26E-04	5,54E-03	arabinosyltransferase	*
>CP017596.1_ARN08094.1_3971_[locus_tag=BJM02_20110] [protein=metal dependent hydrolase] [protein_id=ARN08094.1]_[location=4245144..4246271] [gbkey=CDS]	ARN08094.1	BJM02_20110	-4,261253	5,767916	41,15929	7,76E-10	1,40E-07	metal dependent hydrolase	Rv3796
>CP017596.1_ARN08119.1_4001_[locus_tag=BJM02_20260] [protein=polyketide synthase] [protein_id=ARN08119.1]_[location=complement(4288491..4294871)] [gbkey=CDS]	ARN08119.1	BJM02_20260	3,663317	5,817726	21,69504	1,35E-05	8,23E-04	polyketide synthase	Rv3825c
>CP017596.1_ARN08171.1_4064_[locus_tag=BJM02_20575] [protein=type VII secretion-associated serine protease mycosin] [protein_id=ARN08171.1]_[location=complement(4363873..4365525)] [gbkey=CDS]	ARN08171.1	BJM02_20575	-3,749789	7,008215	36,38209	1,62E-09	2,81E-07	type VII secretion-associated serine pr	Rv3886c
>CP017596.1_ARN08176.1_4070_[locus_tag=BJM02_20605] [protein=hypothetical protein] [protein_id=ARN08176.1]_[location=complement(4369839..4371038)] [gbkey=CDS]	ARN08176.1	BJM02_20605	-2,52142	5,908231	18,28444	1,90E-05	1,11E-03	hypothetical protein	Rv3892c
		RVnc0024_mcr7	-2,058847	5,667728	11,55986	6,74E-04	2,36E-02
		RVnc0036a_MTS2823	-2,697578	8,837782	15,84638	6,87E-05	3,22E-03

## Sheet: BC_391_d60_vs_d28
BJM02_08895	logFC logCPM	F	PValue	FDR	Description	H37Rv
BJM02_08895	6.680921 6.97577	81,38124	1,88E-19	7,79E-16	HAD family hydrolase	Rv1692
