# Supplementary material for: Close Related Drug-Resistance Beijing Isolates of Mycobacterium tuberculosis Reveal a Different Transcriptomic Signature in a Murine Disease Progression Model
Source: Int J Mol Sci. 2022 May 5;23(9):5157. doi: 10.3390/ijms23095157 (PMC9100210; doi:10.3390/ijms23095157)
Supplement: Supplementary file 1 [file ijms-23-05157-s001.zip › TABLE S3. INTER-STRAIN ANALYSIS.ods]

## Sheet: BC-391_Vs_BL-323_D3
TABLE S3. INTER-STRAIN ANALYSIS
Gene_id	CP010873_IDS	logFC	logCPM	F	PValue	FDR	Description	H37Rv	Function
ORTHO_00004	AJW47726.1	3,322122	5,920136	18,34952	7,91E-05	2,60E-02	hypothetical protein	Rv0004	Replication of DNA, esential gene?
ORTHO_00015	AJW47735.1	3,457412	5,955975	19,92959	4,20E-05	2,60E-02	serine/threonine protein kinase	Rv0014c	pnkB, esential gene
ORTHO_00283	AJW47974.1	-3,03314	5,841531	16,63624	6,55E-05	2,60E-02	hypothetical protein	Rv0304c	PPE5, non esential gene
ORTHO_00566	AJW48238.1	3,136526	5,873606	16,37213	7,91E-05	2,60E-02	hypothetical protein	Rv0610c	non esential gene
ORTHO_00680	AJW48347.1	-3,125089	5,861926	17,62042	6,55E-05	2,60E-02	SAM-dependent methyltransferase	Rv0726c	non esential gene
ORTHO_00940	AJW48584.1	-4,138627	6,148771	31,92149	1,61E-08	2,91E-05	hypothetical protein	Rv1006	non esential gene
ORTHO_01175	AJW48807.1	4,634936	7,420109	26,44576	2,72E-07	3,28E-04	amidase	Rv1263	Probable amidase AmiB2 (aminohydrolase), non esential gene
ORTHO_01281	AJW48909.1	-4,351069	6,231571	34,87187	3,54E-09	1,28E-05	hypothetical protein	Rv1375	non esential gene
ORTHO_01397	AJW49020.1	2,711998	6,376324	15,16975	9,83E-05	2,96E-02	glycosyl transferase	Rv1500	Probable glycosyltransferase, non esential gene
ORTHO_01530	AJW49147.1	3,804024	6,058738	24,3634	3,41E-06	3,08E-03	argininosuccinate lyase	Rv1659	Probable argininosuccinate lyase ArgH, esential gene
ORTHO_01766	AJW49365.1	2,960982	6,767214	16,48869	4,90E-05	2,60E-02	acyl-CoA dehydrogenase	Rv1934c	Probable acyl-CoA dehydrogenase FadE17, non esential gene
ORTHO_02171	AJW49726.1	2,823948	6,037648	13,9482	1,88E-04	4,53E-02	hypothetical protein	Rv2352c	PPE family protein PPE38, non esential gene
ORTHO_02709	AJW50213.1	-2,910349	5,817202	15,2536	1,52E-04	4,15E-02	acyl-CoA synthetase	Rv2950c	Fatty-acid-AMP ligase FadD29, non esential gene
ORTHO_03083	AJW50554.1	3,291088	5,911942	18,00756	7,91E-05	2,60E-02	hypothetical protein	Rv3333c	non esential gene
ORTHO_03184	AJW50644.1	2,768535	15,564402	14,24512	1,61E-04	4,15E-02	secretion protein EccB	Rv3448	ESX conserved component EccD4. ESX-4 type VII secretion system protein, non esential gene

## Sheet: BC-391_Vs_BL-323_D14
Gene_id	CP010873_IDS	logFC	logCPM	F	PValue	FDR	Description	H37Rv	Functon
ORTHO_00006	AJW47727.1	-3,099628	5,403963	15,36123	1,10E-04	1,11E-02	DNA gyrase subunit A	Rv0006	DNA gyrase (subunit A) GyrA, esential gene
ORTHO_00015	AJW47735.1	3,09886	5,605004	17,04015	3,66E-05	5,10E-03	serine/threonine protein kinase	Rv0014c	pknB, Transcriptional regulator, esential gene
ORTHO_00043	AJW47760.1	-3,281566	5,44513	17,56215	2,78E-05	4,58E-03	inositol-3-phosphate synthase	Rv0046c	ino1, esential gene
ORTHO_00050	AJW47766.1	-2,794908	5,342654	11,69992	9,75E-04	4,52E-02	30S ribosomal protein S18	Rv0055	rpsR1, esential gene
ORTHO_00194	AJW47888.1	-3,52875	6,03799	23,98276	9,74E-07	5,87E-04	phosphoenolpyruvate carboxykinase	Rv0211	pckA, non esential gene
ORTHO_00262	AJW47954.1	-2,936152	5,795184	16,48127	4,92E-05	6,13E-03	secretion protein EccA	Rv0282	Type VII secretion system, esential gene
ORTHO_00263	AJW47955.1	-3,411001	5,478308	19,10138	1,29E-05	2,96E-03	secretion protein EccB	Rv0283	Type VII secretion system, esential gene
ORTHO_00268	AJW47960.1	-2,715416	5,508531	12,31742	4,49E-04	2,65E-02	type VII secretion protein EsxH	Rv0288	10KD antigen, involved in virulence, esential gene
ORTHO_00332	AJW48021.1	-3,037605	5,391469	14,56834	2,27E-04	1,55E-02	membrane protein	Rv0361	Non esential gene
ORTHO_00425	AJW48112.1	-2,963554	5,374929	13,73107	2,27E-04	1,55E-02	dihydrolipoyl dehydrogenase	Rv0462	LpdC, involved in energy metabolism, esential gene
ORTHO_00430	AJW48117.1	-3,44445	7,091293	26,46873	2,68E-07	1,94E-04	Isocitrate lyase	Rv0467	icl1, lipid metabolism, esential gene
ORTHO_00431	AJW48118.1	-3,498513	5,498892	20,27069	6,73E-06	2,07E-03	3-hydroxybutyryl-CoA dehydrogenase	Rv0468	fadb2, lipid metabolism, non esential gene
ORTHO_00472	AJW48153.1	-2,791044	5,341303	11,76664	6,03E-04	3,31E-02	porphobilinogen deaminase	Rv0510	hemC, intermediary metabolism and respiration, esential gene
ORTHO_00639	AJW48304.1	-2,873268	5,357373	12,64	4,70E-04	2,65E-02	30S ribosomal protein S7	Rv0683	rpsG, esential gene
ORTHO_00640	AJW48306.1	-3,242218	5,853419	20,22975	6,88E-06	2,07E-03	elongation factor Tu	Rv0685	tuf, iron regulated enlongation factor TU, esential gene
ORTHO_00745	AJW48409.1	-2,45816	5,852442	13,23431	2,75E-04	1,84E-02	oxidoreductase	Rv0791c	Non esential gene
ORTHO_00761	AJW48426.1	-3,013063	5,385936	14,28573	2,27E-04	1,55E-02	phosphoribosylaminoimidazole synthetase	Rv0809	purM, purine biosynthesis, esential gene?
ORTHO_00835	AJW48496.1	-3,257363	5,438779	17,28968	3,21E-05	5,03E-03	Probable citrate synthase I GltA2	Rv0896	gltA2, involved in KREBS, esential gene
ORTHO_00867	AJW48524.1	-2,730523	5,330488	10,96688	9,75E-04	4,52E-02	phosphate ABC transporter permease	Rv0929	pstC2, import inorganic phosphate, esential gene, requiered to growth in macrophages
ORTHO_00890	AJW48543.1	-2,996505	5,382136	14,10141	2,27E-04	1,55E-02	membrane protein	Rv0954	Non esential gene
ORTHO_00967	AJW48607.1	-3,243209	5,43294	17,2165	3,34E-05	5,03E-03	transcriptional regulator	Rv1033c	trcR, Two component system, non esential gene
ORTHO_00999	AJW48639.1	-2,935913	5,568028	14,83015	1,18E-04	1,13E-02	cysteine dioxygenase	Rv1065	Non esential gene
ORTHO_01026	AJW48661.1	-3,451634	5,490241	19,54949	1,29E-05	2,96E-03	acyl-ACP desaturase	Rv1094	desA2, lipid metabolims, esential gene
ORTHO_01090	AJW48726.1	-2,481827	5,603347	11,50805	6,93E-04	3,69E-02	nitrate reductase	Rv1164	narI, non esential gene
ORTHO_01103	AJW48739.1	-2,95893	5,373996	13,67655	2,27E-04	1,55E-02	polyketide synthase	Rv1180/Rv1181	No en Tuberculist
ORTHO_01175	AJW48807.1	2,268766	6,606573	14,28982	1,57E-04	1,45E-02	amidase	Rv1263	amiB2, non esential gene
ORTHO_01194	AJW48823.1	-2,998487	5,381013	14,21298	1,63E-04	1,48E-02	carbonate dehydratase	Rv1284	canA, CO2 to form bicarbonate, requiered to growth in mice
ORTHO_01233	AJW48860.1	-3,099864	5,404084	15,36156	1,10E-04	1,11E-02	glyoxalase	Rv1322A	Non esential gene
ORTHO_01234	AJW48861.1	-3,167879	5,420764	16,09765	1,10E-04	1,11E-02	acetyl-CoA acetyltransferase	Rv1323	fadA4, lipid degradation, requiered to growth in mice
ORTHO_01238	AJW48865.1	-3,016584	5,386603	14,33048	2,27E-04	1,55E-02	glycogen phosphorylase	Rv1328	glgP, non esential gene
ORTHO_01253	AJW48881.1	-2,795939	5,342854	11,71075	9,75E-04	4,52E-02	acyl-CoA dehydrogenase	Rv1346	mbtN, non esential gene
ORTHO_01292	AJW48922.1	-2,846027	5,351881	12,3504	4,70E-04	2,65E-02	integration host factor	Rv1388	mihF, non esential gene
ORTHO_01307	AJW48932.1	-3,75778	5,576336	23,39487	1,32E-06	5,98E-04	hypothetical protein	Rv1405c	requiered for growth in mice
ORTHO_01359	AJW48981.1	-2,510024	5,949625	13,70245	2,14E-04	1,55E-02	endonuclease	Rv1461	esential gene
ORTHO_01469	AJW49088.1	-2,794908	5,342654	11,69992	9,75E-04	4,52E-02	quinolinate synthetase	Rv1594	nadA, esential gene
ORTHO_01647	AJW49252.1	-2,780638	5,339343	11,65208	6,42E-04	3,46E-02	peptidase S8	Rv1796	mycP5, esential gene
ORTHO_01712	AJW49319.1	-4,018759	5,660981	26,49406	2,65E-07	1,94E-04	lactate dehydrogenase	Rv1872c	lldD2, non esential gene
ORTHO_01725	AJW49330.1	-2,738104	5,331881	11,05063	9,75E-04	4,52E-02	membrane protein	Rv1887	non esential gene
ORTHO_01743	AJW49342.1	-2,716697	5,327992	10,80432	1,01E-03	4,64E-02	hydroperoxidase	Rv1908c	katG, non esential gene
ORTHO_01848	AJW49440.1	-3,617577	5,538907	21,49396	6,32E-06	2,07E-03	ferredoxin	Rv2007c	fdxA, non esential gene
ORTHO_01872	AJW49463.1	-3,490207	6,011454	23,49356	1,26E-06	5,98E-04	antigen	Rv2031c	hspX, non esential gene
ORTHO_01939	AJW49528.1	-2,40707	5,629355	10,7032	1,07E-03	4,84E-02	PE family protein	Rv2107	PE22, non esential gene
ORTHO_01940	AJW49529.1	-2,640286	5,647927	13,09921	2,96E-04	1,94E-02	hypothetical protein	Rv2108	PPE36, non esential gene
ORTHO_02053	AJW49629.1	-2,79922	5,683641	14,82099	1,18E-04	1,13E-02	ribonuclease	Rv2231A	vapC16, non esential gene
ORTHO_02150	AJW49709.1	-3,21161	5,429353	16,68366	5,38E-05	6,48E-03	major facilitator transporter	Rv2329c	narK1, non esential gene
ORTHO_02210	AJW49764.1	-2,897967	5,361375	12,99985	3,12E-04	2,01E-02	hypothetical protein	Rv2395A	aprA, acid and phagosome regulated gene, non esential gene
ORTHO_02270	AJW49817.1	-3,631512	5,53722	21,87504	2,91E-06	1,17E-03	ATP-dependent protease	Rv2457c	clpX, esential gene
ORTHO_02289	AJW49832.1	-3,009399	5,384926	14,25082	2,27E-04	1,55E-02	ABC transporter ATP-binding protein	Rv2477c	esential gene
ORTHO_02303	AJW49845.1	-3,393142	5,470638	18,99929	1,31E-05	2,96E-03	pyruvate dehydrogenase	Rv2497c	bkdA, non esential gene
ORTHO_02356	AJW49894.1	-3,317436	5,454854	17,9638	2,63E-05	4,53E-03	alanyl-tRNA synthetase	Rv2555c	alaS, esential gene
ORTHO_02417	AJW49950.1	-3,378183	5,471783	18,63115	2,63E-05	4,53E-03	hypoxic response protein 1	Rv2626c	hrp1, non esential gene
ORTHO_02537	AJW50052.1	-3,102601	5,402639	15,48844	8,31E-05	9,69E-03	dihydrodipicolinate synthase	Rv2753c	dapA, esential gene
ORTHO_02746	AJW50245.1	-3,436105	5,485492	19,38209	1,29E-05	2,96E-03	DNA-binding protein	Rv2986c	hupB, esential gene
ORTHO_02786	AJW50284.1	-2,826858	5,348058	12,15274	4,90E-04	2,73E-02	electron transfer flavoprotein subunit beta	Rv3029c	flxA, disruption of this gene afect the growth of MTB
ORTHO_02995	AJW50469.1	-2,873268	5,357373	12,64	4,70E-04	2,65E-02	histidine kinase	Rv3245c	mtrB, two component system, esential gene
ORTHO_03028	AJW50501.1	-2,877156	5,357128	12,77986	3,51E-04	2,19E-02	methylmalonyl-CoA carboxyltransferase	Rv3280	accD5, esential gene
ORTHO_03112	AJW50582.1	-2,838347	5,350413	12,26423	4,70E-04	2,65E-02	diacylglycerol O-acyltransferase	Rv3371	requiered for growth in mice
ORTHO_03164	AJW50628.1	-2,980139	5,378528	13,91693	2,27E-04	1,55E-02	hypothetical protein	*
ORTHO_03195	AJW50653.1	-3,031445	5,38999	14,49985	2,27E-04	1,55E-02	30S ribosomal protein S13	Rv3460c	rpsM, esential gene
ORTHO_03313	AJW50764.1	-4,609712	5,892826	34,54941	4,17E-09	1,51E-05	NDP-hexose 4-ketoreductase	Rv3596c	clpC1, ATP-dependent protease, esential gene, requiered to growth in macrophages
ORTHO_03332	AJW50783.1	-2,867948	5,889288	16,94542	3,85E-05	5,16E-03	secretion protein EspA	Rv3616c	espA, ESX-1 associated protein, requiered for growth in mice
ORTHO_03396	AJW50839.1	-2,768918	5,33765	11,40716	9,75E-04	4,52E-02	metallophosphoesterase	Rv3683	requiered for growth in mice
ORTHO_03482	AJW50917.1	-2,530566	5,911555	14,04604	1,79E-04	1,55E-02	aminotransferase	Rv3772	hisC2, non esential gene
ORTHO_03532	AJW50960.1	-4,164512	5,711785	28,3697	1,00E-07	1,21E-04	polyketide synthase	Rv3825c	pks2, non esential gene
ORTHO_03574	AJW50998.1	-2,795939	5,342854	11,71075	9,75E-04	4,52E-02	peptidase S49	Rv3871	eccCb1, ESX-1 type VII secretion system, requiered to growth in mice
ORTHO_00446	AJW51093.1	-2,821116	5,347838	11,97449	9,75E-04	4,52E-02	L,D-transpeptidase	Rv0483	lprQ, non esential gele
ORTHO_00772	AJW51130.1	-2,696843	6,588274	18,49468	1,71E-05	3,43E-03	tRNA-dihydrouridine synthase	Rv0823c	Possible transcriptional regulator protein, non esential gene
ORTHO_00925	AJW51156.1	-3,062028	5,395041	14,94746	1,11E-04	1,11E-02	FmdB family transcriptional regulator	Rv0991c	Serine rich protein, non esential
ORTHO_01062	AJW51181.1	-2,881138	5,358921	12,72862	4,70E-04	2,65E-02	5-methyltetrahydropteroyltriglutamate-- homocysteine methyltransferase	Rv1133c	metE, non esential gene
ORTHO_01296	AJW51209.1	-3,242688	5,434873	17,12768	3,50E-05	5,06E-03	S-adenosylmethionine synthetase	Rv1392	metK, esential gene
ORTHO_01306	AJW51213.1	-2,737536	5,331772	11,0465	9,75E-04	4,52E-02	MarR family transcriptional regulator	Rv1404	non esential gene
ORTHO_01313	AJW51215.1	-3,043167	5,392828	14,62967	2,27E-04	1,55E-02	lipoprotein LprG	Rv1411c	lprG, requiered to growth in mice and in macrophages
ORTHO_01465	AJW51228.1	-3,21569	5,42809	16,82281	4,11E-05	5,31E-03	biotin synthase	Rv1589	bioB, requiered to growth in mice
ORTHO_01871	AJW51278.1	-4,350808	5,784718	30,87929	2,75E-08	4,98E-05	hypothetical protein	Rv2030c	non esential gene
ORTHO_01946	AJW51287.1	-2,579276	5,495179	11,16311	8,35E-04	4,38E-02	ATPase AAA	Rv2115c	mpa, Involved in proteasomal protein degradation
ORTHO_02450	AJW51371.1	-3,363445	5,464751	18,57717	1,63E-05	3,43E-03	hypothetical protein	Rv2660c	questionable ORF, non esential gene
ORTHO_02498	AJW51379.1	-2,684495	5,659428	13,59029	2,28E-04	1,55E-02	RNA polymerase sigma factor SigB	Rv2710	sigB, esential gene?
ORTHO_03180	AJW51484.1	-3,298597	5,449801	17,75058	2,63E-05	4,53E-03	50S ribosomal protein L13	Rv3443c	rplM, esential gene
ORTHO_03218	AJW51494.1	-2,877081	5,357087	12,7809	3,50E-04	2,19E-02	esterase	Rv3487c	lipF, non esential gene
ORTHO_03537	AJW51535.1	-3,154541	5,417429	15,95232	1,10E-04	1,11E-02	dehydrogenase	Rv3829c	non esential gene
	RVnc0024_mcr7	-2,995313	5,377292	14,1385	1,70E-04	1,61E-02

## Sheet: BC-391_Vs_BL-323_D28
Gene_id	CP010873_IDS	logFC	logCPM	F	PValue	FDR	Description	H37Rv	Columna1
ORTHO_00016	AJW47736.1	-2,549215	5,335193	10,241388	1,58E-03	3,99E-02	penicillin-binding protein	Rv0016c	pbpA, non esential gene
ORTHO_00094	AJW47804.1	-2,744418	5,366987	12,113273	6,43E-04	2,21E-02	membrane protein	Rv0102	esential gene
ORTHO_00099	AJW47809.1	-2,97032	5,408445	14,416819	2,64E-04	1,11E-02	hypothetical protein	Rv0106	non esential gene
ORTHO_00100	AJW47810.1	1,924152	6,94627	15,039182	1,05E-04	5,61E-03	HAD family hydrolase	Rv0107c
ORTHO_00118	AJW47823.1	2,976622	5,427574	13,128228	3,92E-04	1,45E-02	diacylglycerol acyltransferase/mycolyltransferase Ag85A	Rv0129c
ORTHO_00160	AJW47858.1	1,917349	6,990534	14,8548	1,16E-04	6,00E-03	membrane protein	Rv0175
ORTHO_00197	AJW47890.1	-2,583411	5,345365	10,865485	9,80E-04	3,11E-02	acyl-CoA synthetase	Rv0214
ORTHO_00208	AJW47899.1	-3,025598	5,902438	21,089692	4,39E-06	3,61E-04	membrane protein	Rv0226c
ORTHO_00254	AJW47944.1	2,722852	6,814289	25,390248	4,69E-07	5,48E-05	TetR family transcriptional regulator	Rv0273c
ORTHO_00260	AJW47952.1	-1,983926	5,83237	9,664524	1,88E-03	4,47E-02	hypothetical protein	Rv0280
ORTHO_00262	AJW47954.1	-2,478383	6,00755	16,581789	4,66E-05	2,86E-03	secretion protein EccA	Rv0282
ORTHO_00307	AJW47996.1	-5,451725	8,76006	69,647116	7,20E-17	3,72E-14	hypothetical protein	Rv0330c
ORTHO_00382	AJW48070.1	-2,56228	5,340321	10,548019	1,16E-03	3,51E-02	peptidase	Rv0419
ORTHO_00429	AJW48116.1	2,815791	5,3959	11,752577	7,25E-04	2,45E-02	acyl-ACP thioesterase	Rv0466
ORTHO_00430	AJW48117.1	-1,908679	7,511405	15,567328	7,97E-05	4,43E-03	Isocitrate lyase	Rv0467
ORTHO_00431	AJW48118.1	-2,569703	5,839192	15,516828	8,18E-05	4,49E-03	3-hydroxybutyryl-CoA dehydrogenase	Rv0468
ORTHO_00432	AJW48119.1	-2,558046	5,336482	10,309067	1,58E-03	3,99E-02	SAM-dependent methyltransferase	Rv0469
ORTHO_00443	AJW48129.1	-2,833727	5,384093	13,148686	2,88E-04	1,13E-02	hypothetical protein	Rv0479c
ORTHO_00448	AJW48134.1	-2,325501	5,558363	9,893057	1,66E-03	4,09E-02	hypothetical protein	Rv0485
ORTHO_00471	AJW48152.1	-1,118897	19,583039	73,319089	1,12E-17	8,60E-15	glutamyl-tRNA reductase	Rv0509
ORTHO_00498	AJW48176.1	2,765327	6,065828	18,783629	1,47E-05	1,04E-03	glycosyltransferase involved in cell wall biogenesis	Rv0540
ORTHO_00514	AJW48192.1	-2,750487	5,36825	12,191489	6,43E-04	2,21E-02	GDP-mannose-dependent alpha-mannosyltransferase	Rv0557
ORTHO_00604	AJW48273.1	2,926782	6,820933	28,566381	9,08E-08	1,09E-05	alpha-mannosidase	Rv0648
ORTHO_00623	AJW48290.1	-1,912924	6,338001	12,601287	3,86E-04	1,44E-02	DNA-directed RNA polymerase subunit beta	Rv0667
ORTHO_00667	AJW48333.1	-2,871888	5,3908	13,521934	2,64E-04	1,11E-02	arylsulfatase	Rv0711
ORTHO_00721	AJW48387.1	-2,526131	5,472384	10,10992	1,48E-03	3,99E-02	aldehyde dehydrogenase	Rv0768
ORTHO_00737	AJW48402.1	-3,440377	5,73652	22,35085	2,28E-06	2,17E-04	deacetylase	Rv0784
ORTHO_00745	AJW48409.1	3,674997	8,956841	40,840787	1,66E-10	5,01E-08	oxidoreductase	Rv0791c
ORTHO_00757	AJW48423.1	-2,83098	5,383793	13,137073	2,90E-04	1,13E-02	3',5'-cyclic-nucleotide phosphodiesterase	Rv0805
ORTHO_00767	AJW48434.1	3,195488	5,476157	15,648351	7,63E-05	4,31E-03	hypothetical protein	Rv0817c
ORTHO_00818	AJW48482.1	-3,230177	5,464397	17,587359	4,52E-05	2,82E-03	hypothetical protein	Rv0877
ORTHO_00846	AJW48505.1	-2,484502	5,326559	9,787834	1,76E-03	4,29E-02	metal ABC transporter ATPase	Rv0908
ORTHO_00869	AJW48526.1	-2,693049	5,658314	13,928858	1,90E-04	9,41E-03	serine/threonine protein kinase	Rv0931c	pknD
ORTHO_00890	AJW48543.1	-3,127961	5,443633	16,537668	4,77E-05	2,88E-03	membrane protein	Rv0954
ORTHO_00936	AJW48579.1	-2,611604	5,344149	10,715831	1,58E-03	3,99E-02	DNA repair protein	Rv1000c
ORTHO_00937	AJW48580.1	-2,6142	5,344516	10,737957	1,58E-03	3,99E-02	arginine deiminase	Rv1001
ORTHO_00938	AJW48581.1	-4,389281	6,631712	49,900543	1,63E-12	5,36E-10	dolichyl-phosphate-mannose--protein mannosyltransferase	Rv1002c
ORTHO_00953	AJW48594.1	2,854361	7,418311	28,763258	8,20E-08	1,02E-05	transcription-repair coupling factor	Rv1020
ORTHO_00978	AJW48621.1	2,938247	7,468904	30,490213	3,37E-08	5,53E-06	hypothetical protein	Rv1046c
ORTHO_00999	AJW48639.1	-3,516116	5,535669	21,510194	7,88E-06	5,94E-04	cysteine dioxygenase	Rv1065
ORTHO_01093	AJW48729.1	-2,609255	5,343717	10,688676	1,58E-03	3,99E-02	transcriptional regulator	Rv1167c
ORTHO_01137	AJW48770.1	-3,779206	5,611227	25,484744	5,85E-07	6,62E-05	RNA polymerase sigma factor SigE	Rv1221
ORTHO_01144	AJW48775.1	-2,526686	5,331691	10,054694	1,58E-03	3,99E-02	sodium:proton antiporter	Rv1229c
ORTHO_01162	AJW48794.1	-2,966564	5,407796	14,387609	2,64E-04	1,11E-02	MFS transporter	Rv1250
ORTHO_01190	AJW48819.1	3,166008	7,021074	32,929043	9,59E-09	1,83E-06	hypothetical protein	Rv1280c
ORTHO_01194	AJW48823.1	-2,588772	5,340977	10,542578	1,58E-03	3,99E-02	carbonate dehydratase	Rv1284
ORTHO_01209	AJW48837.1	-2,426896	5,470522	9,480607	2,08E-03	4,79E-02	50S ribosomal protein L31	Rv1298
ORTHO_01242	AJW48869.1	2,827265	7,881815	28,930829	7,52E-08	1,02E-05	hypothetical protein	Rv1333
ORTHO_01281	AJW48909.1	-3,304115	5,861477	23,343249	1,36E-06	1,36E-04	hypothetical protein	Rv1375
ORTHO_01288	AJW48917.1	-4,606029	6,752003	55,115397	1,15E-13	4,85E-11	carbamoyl phosphate synthase small subunit	Rv1383
ORTHO_01359	AJW48981.1	-2,464865	6,659684	22,05164	2,66E-06	2,40E-04	endonuclease	Rv1461
ORTHO_01397	AJW49020.1	-3,996097	5,679692	28,863834	7,79E-08	1,02E-05	glycosyl transferase	Rv1500
ORTHO_01433	AJW49052.1	-2,597094	5,345156	10,820981	1,00E-03	3,16E-02	hypothetical protein	Rv1535
ORTHO_01470	AJW49089.1	-2,047355	5,915471	11,072601	8,77E-04	2,88E-02	L-aspartate oxidase	Rv1595
ORTHO_01506	AJW49124.1	-2,537871	5,333693	10,163815	1,58E-03	3,99E-02	major facilitator transporter	Rv1634
ORTHO_01515	AJW49131.1	-2,616574	5,344814	10,755435	1,58E-03	3,99E-02	50S ribosomal protein L20	Rv1643
ORTHO_01516	AJW49132.1	2,57663	5,354967	9,742788	1,80E-03	4,37E-02	RNA methyltransferase	Rv1644
ORTHO_01530	AJW49147.1	-3,052446	5,425931	15,33172	1,09E-04	5,71E-03	argininosuccinate lyase	Rv1659
ORTHO_01543	AJW49158.1	2,382479	7,048944	21,387479	3,76E-06	3,16E-04	hypothetical protein	Rv1676
ORTHO_01549	AJW49163.1	-3,378891	5,500313	19,729528	8,93E-06	6,59E-04	coiled-coil structural protein	Rv1682
ORTHO_01647	AJW49252.1	-2,827581	5,384823	13,253716	2,72E-04	1,13E-02	peptidase S8	Rv1796
ORTHO_01648	AJW49253.1	-2,607259	5,346512	10,903637	9,60E-04	3,07E-02	secretion protein EccC	Rv1797
ORTHO_01651	AJW49256.1	3,152878	7,338565	33,407484	7,50E-09	1,51E-06	hypothetical protein	Rv1800
ORTHO_01667	AJW49272.1	-2,562958	5,33651	10,304276	1,58E-03	3,99E-02	hypothetical protein	Rv1820
ORTHO_01688	AJW49294.1	3,864479	5,660278	24,037573	9,47E-07	9,78E-05	Zn-dependent protease with chaperone function	Rv1845c
ORTHO_01695	AJW49303.1	-3,270381	5,473429	18,054835	4,52E-05	2,82E-03	NADH dehydrogenase	Rv1854c
ORTHO_01733	AJW49336.1	3,225571	7,20236	34,58474	4,10E-09	9,88E-07	hypothetical protein	Rv1898
ORTHO_01750	AJW49348.1	-2,639533	5,645024	13,358937	2,57E-04	1,11E-02	isocitrate lyase	Rv1916
ORTHO_01766	AJW49365.1	-2,42011	6,190485	17,638634	2,67E-05	1,82E-03	acyl-CoA dehydrogenase	Rv1934c
ORTHO_01811	AJW49406.1	-2,904879	5,396628	13,836566	2,64E-04	1,11E-02	PE family protein	*
ORTHO_01820	AJW49415.1	-2,709522	5,361729	11,814912	6,43E-04	2,21E-02	ribonucleotide-diphosphate reductase subunit beta	Rv1981c
ORTHO_01836	AJW49431.1	1,733272	9,248142	11,255319	7,94E-04	2,64E-02	hypothetical protein	Rv1993c
ORTHO_01847	AJW49439.1	-3,545733	5,543355	22,218539	2,44E-06	2,26E-04	haloacid dehalogenase	Rv2006
ORTHO_01860	AJW49452.1	2,723638	6,615584	24,20709	8,67E-07	9,22E-05	hypothetical protein	Rv2020c
ORTHO_01939	AJW49528.1	-2,134036	5,858717	10,963362	9,30E-04	3,03E-02	PE family protein	Rv2107
ORTHO_01983	AJW49569.1	-2,683621	5,357888	11,591723	6,63E-04	2,26E-02	cell division protein FtsQ	Rv2151c
ORTHO_01989	AJW49574.1	2,080275	6,966812	17,104801	3,54E-05	2,37E-03	hypothetical protein	Rv2159c
ORTHO_01998	AJW49580.1	-2,738554	5,366342	12,082457	6,43E-04	2,21E-02	hypothetical protein	Rv2172c
ORTHO_02048	AJW49624.1	-2,989557	5,41356	14,740849	1,23E-04	6,29E-03	hypothetical protein	Rv2226
ORTHO_02064	AJW49637.1	-2,939334	5,402859	14,151985	2,64E-04	1,11E-02	PucR family transcriptional regulator	Rv2242
ORTHO_02114	AJW49676.1	-2,464543	5,324194	9,663364	1,88E-03	4,47E-02	heat shock protein 90	Rv2299c
ORTHO_02131	AJW49690.1	3,425078	8,309543	37,532862	9,03E-10	2,51E-07	hypothetical protein	Rv2311
ORTHO_02145	AJW49704.1	-2,336315	6,680172	20,656643	5,50E-06	4,33E-04	AsnC family transcriptional regulator	Rv2324
ORTHO_02184	AJW49741.1	2,315124	7,377914	20,976813	4,66E-06	3,74E-04	hypothetical protein	Rv2370c
ORTHO_02187	AJW49744.1	-3,430392	6,623111	36,794888	1,32E-09	3,41E-07	molecular chaperone DnaJ	Rv2373c
ORTHO_02192	AJW49749.1	2,934544	7,356698	29,755793	4,91E-08	7,73E-06	lysine 6-monooxygenase	Rv2378c
ORTHO_02194	AJW49750.1	1,625738	6,656975	10,391801	1,27E-03	3,75E-02	peptide synthetase	Rv2380c
ORTHO_02197	AJW49751.1	-1,862225	5,942549	9,519785	2,03E-03	4,74E-02	peptide synthetase	Rv2383c
ORTHO_02202	AJW49756.1	-2,924123	5,400011	14,009455	2,64E-04	1,11E-02	membrane protein	Rv2387
ORTHO_02210	AJW49764.1	-1,74277	6,248521	10,241392	1,37E-03	3,98E-02	hypothetical protein	Rv2395A
ORTHO_02226	AJW49779.1	-2,980279	5,411994	14,673185	1,28E-04	6,43E-03	hypothetical protein	Rv2411c
ORTHO_02279	AJW49825.1	3,485595	6,312074	29,313818	6,17E-08	8,93E-06	aminopeptidase N	Rv2467
ORTHO_02302	AJW49844.1	-2,779936	5,37552	12,676052	3,71E-04	1,40E-02	2-oxoisovalerate dehydrogenase	Rv2496c
ORTHO_02307	AJW49848.1	2,387394	5,91722	13,432556	2,47E-04	1,11E-02	acetyl-COA carboxylase	Rv2501c
ORTHO_02356	AJW49894.1	-2,872578	5,390929	13,529274	2,64E-04	1,11E-02	alanyl-tRNA synthetase	Rv2555c
ORTHO_02414	AJW49947.1	-2,156894	6,030408	13,155677	2,87E-04	1,13E-02	universal stress protein	Rv2623
ORTHO_02501	AJW50020.1	-2,798178	5,376056	12,631258	6,43E-04	2,21E-02	pyridine nucleotide-disulfide oxidoreductase	Rv2713
ORTHO_02637	AJW50149.1	-2,973398	5,408958	14,438915	2,64E-04	1,11E-02	GCN5 family acetyltransferase	Rv2867c
ORTHO_02655	AJW50166.1	-5,56799	8,866833	71,013152	3,61E-17	2,17E-14	amidase	Rv2888c
ORTHO_02657	AJW50168.1	-2,499102	5,328498	9,890831	1,66E-03	4,09E-02	30S ribosomal protein S2	Rv2890c
ORTHO_02695	AJW50201.1	-2,605108	5,690094	13,156276	2,87E-04	1,13E-02	acyl-CoA synthetase	Rv2930
ORTHO_02709	AJW50213.1	-3,198714	5,457317	17,19017	4,52E-05	2,82E-03	acyl-CoA synthetase	Rv2950c
ORTHO_02730	AJW50228.1	-2,492334	5,46988	9,959457	1,60E-03	4,02E-02	lipase	Rv2970c
ORTHO_02733	AJW50232.1	-2,55524	5,336195	10,295083	1,58E-03	3,99E-02	ATP-dependent DNA helicase RecG	Rv2973c
ORTHO_02734	AJW50233.1	2,124985	6,069052	12,205365	4,77E-04	1,74E-02	dihydroxyacetone kinase	Rv2974c
ORTHO_02744	AJW50243.1	-3,277393	5,475782	18,306577	1,88E-05	1,31E-03	polyphosphate kinase	Rv2984
ORTHO_02765	AJW50262.1	-2,530887	5,473681	10,269615	1,35E-03	3,95E-02	lipoprotein LppZ	Rv3006
ORTHO_02810	AJW50301.1	-2,598615	5,342321	10,610835	1,58E-03	3,99E-02	ribonucleotide reductase	Rv3052c
ORTHO_02811	AJW50302.1	-3,586118	5,554777	22,61083	3,30E-06	2,85E-04	glutaredoxin	Rv3053c
ORTHO_02833	AJW50321.1	-2,712999	5,362251	11,844932	6,43E-04	2,21E-02	hydrolase	Rv3077
ORTHO_02883	AJW50371.1	-1,979942	5,973305	10,941578	9,41E-04	3,04E-02	diacylglycerol O-acyltransferase	Rv3130c
ORTHO_02956	AJW50436.1	-2,616047	5,628954	13,155229	2,87E-04	1,13E-02	molybdopterin biosynthesis-like protein MoeZ	Rv3206c
ORTHO_02968	AJW50447.1	-2,489961	6,370676	20,050351	7,55E-06	5,81E-04	WhiB family transcriptional regulator	Rv3219
ORTHO_02973	AJW50451.1	-3,106913	5,437867	16,091673	6,04E-05	3,52E-03	RNA polymerase sigma factor RpoE	Rv3223c
ORTHO_02998	AJW50472.1	-3,489586	6,262538	32,218157	1,38E-08	2,50E-06	S-adenosyl-L-homocysteine hydrolase	Rv3248c
ORTHO_03019	AJW50493.1	-2,802267	5,378889	12,859433	3,36E-04	1,29E-02	membrane protein	Rv3271c
ORTHO_03038	AJW50510.1	-3,154324	5,448957	16,836118	4,08E-05	2,68E-03	L-lysine aminotransferase	Rv3290c
ORTHO_03055	AJW50527.1	-2,55625	6,179685	19,134002	1,22E-05	8,83E-04	phosphomannomutase	Rv3308
ORTHO_03083	AJW50554.1	-3,036618	5,424217	15,331221	9,03E-05	4,87E-03	hypothetical protein	Rv3333c
ORTHO_03178	AJW50639.1	-2,580392	5,339631	10,471912	1,58E-03	3,99E-02	phosphoglucosamine mutase	Rv3441c
ORTHO_03184	AJW50644.1	-6,707929	14,4796	225,519266	6,64E-51	2,40E-47	secretion protein EccB	Rv3448
ORTHO_03242	AJW50698.1	-2,59869	5,344986	10,806018	1,01E-03	3,16E-02	acetoacetate decarboxylase	Rv3519
ORTHO_03244	AJW50700.1	-2,547278	5,338187	10,436153	1,24E-03	3,70E-02	DNA-binding protein	Rv3521
ORTHO_03265	AJW50719.1	-2,898268	5,39532	13,762048	2,64E-04	1,11E-02	acyl-CoA dehydrogenase	Rv3544c
ORTHO_03266	AJW50720.1	1,472219	7,190695	9,499006	2,06E-03	4,77E-02	steroid C27-monooxygenase	Rv3545c
ORTHO_03402	AJW50844.1	-3,88942	5,900562	30,710432	3,00E-08	5,18E-06	membrane protein	Rv3689
ORTHO_03441	AJW50880.1	2,081525	13,003184	22,390013	2,23E-06	2,17E-04	transferase	Rv3729
ORTHO_03502	AJW50934.1	1,984271	6,383302	12,835394	3,40E-04	1,30E-02	arabinofuranosyltransferase	Rv3792
ORTHO_03504	AJW50937.1	-4,27387	5,780046	33,682874	6,51E-09	1,39E-06	metal dependent hydrolase	Rv3796
ORTHO_03559	AJW50982.1	-2,837913	5,384986	13,203763	2,80E-04	1,13E-02	FAD-containing monooxygenase EthA	Rv3854c
ORTHO_03585	AJW51008.1	-2,243958	6,271165	16,033345	6,23E-05	3,58E-03	peptidase S8	Rv3886c
ORTHO_03608	AJW51029.1	-2,88103	5,392142	13,58608	2,64E-04	1,11E-02	thioredoxin reductase	Rv3913
ORTHO_00075	AJW51048.1	-2,04589	5,825558	10,312118	1,32E-03	3,89E-02	hypothetical protein	Rv0079
ORTHO_00085	AJW51052.1	-3,999219	5,681762	28,783332	8,12E-08	1,02E-05	MTA/SAH nucleosidase	Rv0091
ORTHO_00167	AJW51067.1	3,216145	7,459273	34,436059	4,42E-09	1,00E-06	RNA polymerase factor sigma-70	Rv0182c
ORTHO_00202	AJW51073.1	-2,579504	5,342465	10,656406	1,10E-03	3,36E-02	esterase	Rv0220
ORTHO_00219	AJW51076.1	2,514736	17,639803	150,41577	1,51E-34	2,73E-31	membrane protein	Rv0236c
ORTHO_00452	AJW51096.1	-2,588857	5,343912	10,743223	1,05E-03	3,24E-02	XRE family transcriptional regulator	Rv0491
ORTHO_00569	AJW51111.1	-2,210012	5,686541	10,018906	1,55E-03	3,99E-02	tetratricopeptide repeat family protein	Rv0613c
ORTHO_00772	AJW51130.1	2,485322	9,152905	21,666105	3,25E-06	2,85E-04	tRNA-dihydrouridine synthase	Rv0823c
ORTHO_00794	AJW51135.1	-5,946055	7,127582	74,074715	7,66E-18	8,60E-15	hypothetical protein	Rv0847
ORTHO_00945	AJW51161.1	-5,706597	7,837884	73,206174	1,19E-17	8,60E-15	4-diphosphocytidyl-2C-methyl-D-erythritol kinase	Rv1011
ORTHO_00952	AJW51163.1	-2,549396	5,33542	10,255037	1,58E-03	3,99E-02	TetR family transcriptional regulator	Rv1019
ORTHO_01006	AJW51172.1	-2,275721	5,67333	10,553848	1,16E-03	3,51E-02	acetyl-CoA acetyltransferase	Rv1074c
ORTHO_01060	AJW51180.1	-4,039308	5,693948	29,564435	5,42E-08	8,18E-06	citrate synthase	Rv1131
ORTHO_01157	AJW51196.1	4,764653	7,310846	55,015365	1,21E-13	4,85E-11	lipoprotein LpqZ	Rv1244
ORTHO_01303	AJW51211.1	-2,447854	5,32183	9,534602	2,02E-03	4,74E-02	membrane protein	Rv1401
ORTHO_01892	AJW51280.1	1,817508	6,11987	9,603988	1,94E-03	4,59E-02	dolichol-phosphate mannosyltransferase	*
ORTHO_02240	AJW51340.1	-4,803001	6,375278	49,973545	1,57E-12	5,36E-10	ATPase	Rv2426c
ORTHO_02528	AJW51385.1	1,917982	6,206493	11,275848	7,86E-04	2,63E-02	membrane protein	Rv2743c
ORTHO_02645	AJW51398.1	-2,509454	5,329468	9,938584	1,62E-03	4,04E-02	cell surface protein	Rv2875
ORTHO_03031	AJW51460.1	-2,96562	5,407638	14,380775	2,64E-04	1,11E-02	thiosulfate sulfurtransferase	Rv3283
ORTHO_03215	AJW51492.1	-3,014734	5,594938	16,244964	5,57E-05	3,30E-03	transcriptional regulator, LytR family protein	Rv3484
ORTHO_03218	AJW51494.1	-2,518678	5,333757	10,198268	1,41E-03	3,99E-02	esterase	Rv3487c
ORTHO_03362	AJW51512.1	-2,853572	6,33246	24,59397	7,09E-07	7,77E-05	DEAD/DEAH box helicase	Rv3649
ORTHO_03404	AJW51517.1	2,504406	5,508955	9,719684	1,82E-03	4,40E-02	membrane protein	Rv3691
ORTHO_03539	AJW51536.1	-2,515287	5,330815	10,014339	1,58E-03	3,99E-02	methyltransferase type 11	Rv3832c
	RVnc0024_mcr7	-1,901853	6,284258	12,886352	3,31E-04	1,21E-02
	RVnc0036_MTS1338	-2,390528	5,297001	9,434518	2,13E-03	4,65E-02
	RVnc0036a_MTS2823	-2,05864	10,151579	20,180407	7,06E-06	4,94E-04
	UB21_20845_RNAse_P_RNA	-2,404229	11,229733	29,179861	6,61E-08	8,31E-06
